# Supplementary material for: Introgressed Manihot glaziovii Alleles in Modern Cassava Germplasm Benefit Important Traits and Are Under Balancing Selection
Source: bioRxiv preprint, doi:10.1101/624114, version 1 (2019-05-01)
Supplement: SI_Datasets [file 624114_file03.xlsx]

## Sheet: TableS01
SNP	Chr	Pos	EscFreq	GlazFreq	AbsFreqDiff	CountedAllele	AltAllele	GlazAllele	IDMtype	cM
S1_26576	1	26576	0.15	0	0.15	C	A		nonIDM	2.7
S1_26624	1	26624	0	0	0	C	T		tagIDM	2.7
S1_26659	1	26659	0	0	0	G	C		tagIDM	2.7
S1_27720	1	27720	0	0	0	A	C		tagIDM	2.7
S1_27739	1	27739	0.05	0	0.05	G	A		nonIDM	2.7
S1_27746	1	27746	0	1	1	G	A	G	Strict	2.7
S1_27861	1	27861	0.1	0	0.1	T	C		nonIDM	2.7
S1_27874	1	27874	0.1	1	0.9	A	G		tagIDM	2.7
S1_75465	1	75465	0.3	0.94	0.64	T	C		nonIDM	3
S1_75629	1	75629	0.5	0.94	0.44	A	T		nonIDM	3
S1_84637	1	84637	0.05	0	0.05	G	A		nonIDM	3.3
S1_84746	1	84746	0.05	0	0.05	A	T		nonIDM	3.3
S1_84843	1	84843	0.15	0	0.15	A	C		nonIDM	3.3
S1_84868	1	84868	0.05	0	0.05	C	T		nonIDM	3.3
S1_84975	1	84975	0	0.31	0.31	G	A	G	GlazPoly	3.3
S1_126181	1	126181	0	1	1	T	C	T	Strict	2.5
S1_126189	1	126189	0	1	1	G	A	G	Strict	2.5
S1_126230	1	126230	0	1	1	G	A	G	Strict	2.5
S1_126277	1	126277	0	0	0	G	A		nonIDM	2.5
S1_126282	1	126282	0	0.88	0.88	G	A	G	GlazPoly	2.5
S1_126289	1	126289	0.05	0	0.05	A	C		nonIDM	2.5
S1_126406	1	126406	0.4	0	0.4	A	G		nonIDM	2.5
S1_126442	1	126442	0.4	0	0.4	G	A		nonIDM	2.5
S1_126463	1	126463	0	1	1	G	A	G	Strict	2.5
S1_126501	1	126501	0	1	1	A	G	A	Strict	2.5
S1_126511	1	126511	0.35	0	0.35	T	C		nonIDM	2.5
S1_143855	1	143855	0	0.94	0.94	A	G	A	GlazPoly	4.1
S1_143943	1	143943	0	0.38	0.38	T	G	T	GlazPoly	4.1
S1_144275	1	144275	0	1	1	T	C	T	Strict	4
S1_144281	1	144281	0	0.06	0.06	G	A	G	GlazPoly	4
S1_145739	1	145739	0	0	0	C	G		nonIDM	4
S1_145889	1	145889	0.15	0	0.15	T	A		nonIDM	4
S1_145960	1	145960	0	0.88	0.88	A	G	A	GlazPoly	4
S1_146000	1	146000	0	0.06	0.06	G	C	G	GlazPoly	4
S1_146013	1	146013	0	0	0	C	G		nonIDM	4
S1_146026	1	146026	0	0.06	0.06	C	T	C	GlazPoly	4
S1_147839	1	147839	0	0.06	0.06	A	G	A	GlazPoly	4
S1_147849	1	147849	0	0	0	A	G		nonIDM	4
S1_252301	1	252301	0	0	0	A	T		nonIDM	1.5
S1_252326	1	252326	0.05	1	0.95	A	T		nonIDM	1.5
S1_252376	1	252376	0	0	0	G	C		tagIDM	1.5
S1_252382	1	252382	0.2	0	0.2	T	C		nonIDM	1.5
S1_252391	1	252391	0	0.38	0.38	T	G	T	GlazPoly	1.5
S1_252397	1	252397	0	0	0	A	C		nonIDM	1.5
S1_252403	1	252403	0.05	0	0.05	G	C		nonIDM	1.5
S1_252409	1	252409	0.1	0.44	0.34	C	G		nonIDM	1.5
S1_252441	1	252441	0.1	1	0.9	T	C		nonIDM	1.5
S1_252450	1	252450	0.05	0	0.05	A	G		nonIDM	1.5
S1_253194	1	253194	0	0	0	A	T		nonIDM	1.5
S1_253294	1	253294	0	0	0	A	T		tagIDM	1.5
S1_253550	1	253550	0	0	0	A	T		tagIDM	1.3
S1_253596	1	253596	0	0	0	T	A		nonIDM	1.3
S1_253605	1	253605	0.1	0	0.1	G	C		nonIDM	1.3
S1_253684	1	253684	0	0	0	G	C		tagIDM	1.3
S1_253728	1	253728	0	0	0	G	A		tagIDM	1.3
S1_253935	1	253935	0	0	0	C	A		tagIDM	1.3
S1_254029	1	254029	0	0.5	0.5	G	A	G	GlazPoly	1.3
S1_254074	1	254074	0	0.06	0.06	G	A	G	GlazPoly	1.3
S1_254121	1	254121	0	0	0	A	T		nonIDM	1.3
S1_254148	1	254148	0.15	0	0.15	C	T		nonIDM	1.3
S1_255877	1	255877	0.2	0	0.2	A	C		nonIDM	1.3
S1_255889	1	255889	0.06	0	0.06	C	G		nonIDM	1.3
S1_255925	1	255925	0	0	0	A	G		nonIDM	1.3
S1_260659	1	260659	0.05	0	0.05	T	A		nonIDM	1.2
S1_260691	1	260691	0.6	1	0.4	C	A		nonIDM	1.2
S1_260701	1	260701	0	0	0	A	G		nonIDM	1.2
S1_260716	1	260716	0.1	1	0.9	G	A		nonIDM	1.2
S1_260788	1	260788	0	0.19	0.19	G	A	G	GlazPoly	1.2
S1_260807	1	260807	0.1	0	0.1	A	G		nonIDM	1.2
S1_260815	1	260815	0.55	1	0.45	G	A		nonIDM	1.2
S1_260833	1	260833	0.1	1	0.9	G	C		tagIDM	1.2
S1_292067	1	292067	0.1	1	0.9	T	G		tagIDM	0.5
S1_292079	1	292079	0	0.5	0.5	C	A	C	GlazPoly	0.5
S1_292090	1	292090	0.05	0	0.05	G	A		nonIDM	0.5
S1_292197	1	292197	0.05	0	0.05	C	A		nonIDM	0.5
S1_292219	1	292219	0.1	1	0.9	A	G		tagIDM	0.5
S1_292227	1	292227	0	0	0	A	T		nonIDM	0.5
S1_292233	1	292233	0	1	1	A	G	A	Strict	0.5
S1_294221	1	294221	0.1	0	0.1	A	G		nonIDM	0.6
S1_294550	1	294550	0.1	0	0.1	C	T		nonIDM	0.6
S1_307950	1	307950	0	0.38	0.38	T	A	T	GlazPoly	1
S1_307957	1	307957	0	0.38	0.38	C	G	C	GlazPoly	1
S1_307966	1	307966	0.2	1	0.8	G	A		nonIDM	1
S1_308014	1	308014	0	1	1	G	C	G	Strict	1
S1_308025	1	308025	0.2	1	0.8	T	C		nonIDM	1
S1_308066	1	308066	0.2	1	0.8	A	T		nonIDM	1
S1_308324	1	308324	0.2	1	0.8	A	T		nonIDM	1
S1_308345	1	308345	0.1	0	0.1	G	T		nonIDM	1
S1_308381	1	308381	0	1	1	T	C	T	Strict	1
S1_311450	1	311450	0	0	0	G	T		nonIDM	1
S1_340005	1	340005	0	0.06	0.06	T	C	T	GlazPoly	1
S1_340133	1	340133	0	0.06	0.06	T	A	T	GlazPoly	1
S1_342688	1	342688	0	1	1	G	A	G	Strict	1.2
S1_342781	1	342781	0	1	1	C	A	C	Strict	1.2
S1_342806	1	342806	0.1	0	0.1	G	A		nonIDM	1.2
S1_346031	1	346031	0.5	0	0.5	C	T		nonIDM	1.3
S1_346219	1	346219	0.45	0	0.45	T	C		nonIDM	1.3
S1_346224	1	346224	0.2	1	0.8	G	A		nonIDM	1.3
S1_354684	1	354684	0	1	1	T	C	T	Strict	1.5
S1_354795	1	354795	0	0.38	0.38	G	A	G	GlazPoly	1.5
S1_354840	1	354840	0.2	0	0.2	A	G		nonIDM	1.5
S1_354888	1	354888	0.1	0	0.1	C	T		nonIDM	1.5
S1_356953	1	356953	0.5	1	0.5	G	C		nonIDM	1.5
S1_428070	1	428070	0	1	1	T	G	T	Strict	2.1
S1_428075	1	428075	0	1	1	A	C	A	Strict	2.1
S1_432870	1	432870	0	1	1	G	A	G	Strict	2.1
S1_432876	1	432876	0	1	1	G	A	G	Strict	2.1
S1_432921	1	432921	0	1	1	T	C	T	Strict	2.1
S1_508729	1	508729	0.05	0	0.05	A	T		nonIDM	2.8
S1_510204	1	510204	0	0	0	T	A		nonIDM	2.9
S1_572056	1	572056	0	0.88	0.88	A	G	A	GlazPoly	3.8
S1_572123	1	572123	0	0.38	0.38	A	G	A	GlazPoly	3.8
S1_572133	1	572133	0.25	0	0.25	G	A		nonIDM	3.8
S1_581139	1	581139	0.2	0	0.2	A	G		nonIDM	3.9
S1_581162	1	581162	0.1	0.12	0.02	G	A		nonIDM	3.9
S1_582708	1	582708	0	0	0	G	A		nonIDM	3.9
S1_582718	1	582718	0.1	0	0.1	G	C		nonIDM	3.9
S1_582761	1	582761	0.05	0	0.05	C	T		nonIDM	3.9
S1_582943	1	582943	0.15	0	0.15	A	G		nonIDM	3.9
S1_583200	1	583200	0	1	1	T	G	T	Strict	3.9
S1_583366	1	583366	0.3	0	0.3	C	A		nonIDM	3.9
S1_615032	1	615032	0	1	1	C	A	C	Strict	3.7
S1_615055	1	615055	0	0	0	T	C		nonIDM	3.7
S1_615060	1	615060	0.05	0	0.05	C	T		nonIDM	3.7
S1_618844	1	618844	0	1	1	C	T	C	Strict	3.7
S1_618870	1	618870	0	0.19	0.19	T	G	T	GlazPoly	3.7
S1_618906	1	618906	0	1	1	A	T	A	Strict	3.7
S1_632331	1	632331	0	0	0	C	T		nonIDM	3.6
S1_632359	1	632359	0	0.19	0.19	C	G	C	GlazPoly	3.6
S1_632382	1	632382	0.55	1	0.45	T	C		nonIDM	3.6
S1_633894	1	633894	0.15	0	0.15	C	G		nonIDM	3.6
S1_633941	1	633941	0.1	1	0.9	G	A		nonIDM	3.6
S1_635988	1	635988	0.15	0	0.15	T	A		nonIDM	3.5
S1_636002	1	636002	0	0	0	A	G		nonIDM	3.5
S1_636018	1	636018	0.05	0	0.05	C	T		nonIDM	3.5
S1_639631	1	639631	0.15	0	0.15	G	C		nonIDM	3.6
S1_640019	1	640019	0	0.38	0.38	C	T	C	GlazPoly	3.6
S1_640044	1	640044	0	1	1	C	T	C	Strict	3.6
S1_647714	1	647714	0.1	0	0.1	T	C		nonIDM	3.9
S1_647734	1	647734	0.4	0	0.4	G	A		nonIDM	3.9
S1_647747	1	647747	0.5	0	0.5	T	G		nonIDM	3.9
S1_647760	1	647760	0.35	0	0.35	C	A		nonIDM	3.9
S1_652613	1	652613	0.05	0	0.05	A	T		nonIDM	4
S1_652653	1	652653	0.05	0	0.05	G	T		nonIDM	3.4
S1_652699	1	652699	0.1	1	0.9	C	G		nonIDM	3.4
S1_652720	1	652720	0.05	0.1	0.05	G	A		nonIDM	3.4
S1_652836	1	652836	0	1	1	A	G	A	Strict	3.3
S1_652842	1	652842	0.15	1	0.85	T	A		nonIDM	3.3
S1_695262	1	695262	0.1	0	0.1	G	C		nonIDM	4
S1_695276	1	695276	0	0.17	0.17	A	G	A	GlazPoly	4
S1_697904	1	697904	0.1	0	0.1	C	T		nonIDM	4.1
S1_719560	1	719560	0	0	0	T	C		nonIDM	4
S1_719628	1	719628	0.25	1	0.75	A	C		nonIDM	4
S1_719688	1	719688	0	0	0	G	A		nonIDM	4
S1_719722	1	719722	0	0	0	T	G		nonIDM	4
S1_719884	1	719884	0.05	0	0.05	C	T		nonIDM	4.1
S1_753162	1	753162	0	0	0	T	C		nonIDM	3.8
S1_764473	1	764473	0	0	0	A	G		nonIDM	3.8
S1_793289	1	793289	0.05	0	0.05	G	C		nonIDM	3.4
S1_793325	1	793325	0.1	0	0.1	C	T		nonIDM	3.4
S1_793335	1	793335	0	0	0	A	C		nonIDM	3.4
S1_793343	1	793343	0.05	0	0.05	C	G		nonIDM	3.4
S1_793386	1	793386	0.1	0	0.1	G	A		nonIDM	3.4
S1_793415	1	793415	0	0	0	G	A		nonIDM	3.4
S1_793451	1	793451	0.2	0	0.2	C	T		nonIDM	3.4
S1_793742	1	793742	0.05	0	0.05	G	C		nonIDM	3.4
S1_793775	1	793775	0.05	0	0.05	A	G		nonIDM	3.4
S1_793787	1	793787	0.05	0	0.05	C	T		nonIDM	3.4
S1_794146	1	794146	0	0	0	A	T		nonIDM	3.4
S1_797318	1	797318	0	0	0	A	T		nonIDM	3.4
S1_797352	1	797352	0	0.19	0.19	A	G	A	GlazPoly	3.4
S1_797373	1	797373	0.1	0	0.1	A	G		nonIDM	3.4
S1_805990	1	805990	0	0	0	C	G		nonIDM	3.9
S1_811711	1	811711	0.05	0	0.05	T	A		nonIDM	3.6
S1_811720	1	811720	0	0	0	T	C		nonIDM	3.6
S1_811739	1	811739	0	0	0	T	G		nonIDM	3.6
S1_811750	1	811750	0.05	0	0.05	T	C		nonIDM	3.6
S1_811756	1	811756	0.45	1	0.55	C	G		nonIDM	3.6
S1_816599	1	816599	0.05	0	0.05	T	G		nonIDM	3.7
S1_816736	1	816736	0	1	1	A	G	A	Strict	3.7
S1_816743	1	816743	0.1	0	0.1	G	A		nonIDM	3.7
S1_816752	1	816752	0	0	0	C	G		nonIDM	3.7
S1_816779	1	816779	0	0	0	T	A		nonIDM	3.7
S1_816788	1	816788	0	1	1	T	A	T	Strict	3.7
S1_829890	1	829890	0.35	1	0.65	A	G		nonIDM	4.1
S1_829912	1	829912	0.1	1	0.9	A	G		nonIDM	4.1
S1_829930	1	829930	0.1	0.88	0.78	G	A		nonIDM	4.1
S1_830449	1	830449	0.1	0	0.1	A	G		nonIDM	4.1
S1_832434	1	832434	0.05	0	0.05	C	T		nonIDM	4.2
S1_832443	1	832443	0.05	0	0.05	A	T		nonIDM	4.2
S1_832448	1	832448	0	0.25	0.25	T	G	T	GlazPoly	4.2
S1_832654	1	832654	0	0.25	0.25	G	T	G	GlazPoly	4.2
S1_832751	1	832751	0.05	0	0.05	A	C		nonIDM	4.2
S1_832786	1	832786	0.55	0	0.55	C	T		nonIDM	4.2
S1_844765	1	844765	0	0	0	C	T		nonIDM	4.9
S1_847182	1	847182	0	0.69	0.69	A	G	A	GlazPoly	5.1
S1_847206	1	847206	0.45	0	0.45	G	T		nonIDM	5.1
S1_847822	1	847822	0.35	0	0.35	C	T		nonIDM	5.1
S1_863034	1	863034	0.15	1	0.85	A	C		tagIDM	5.5
S1_863046	1	863046	0	0.38	0.38	A	C	A	GlazPoly	5.5
S1_863080	1	863080	0.1	1	0.9	A	G		tagIDM	5.5
S1_863098	1	863098	0	0.38	0.38	A	T	A	GlazPoly	5.5
S1_868883	1	868883	0	0.06	0.06	G	A	G	GlazPoly	5.6
S1_868895	1	868895	0	1	1	T	A	T	Strict	5.6
S1_868916	1	868916	0.05	0	0.05	A	G		nonIDM	5.6
S1_868929	1	868929	0.3	0	0.3	T	G		nonIDM	5.6
S1_868965	1	868965	0.05	0	0.05	G	C		nonIDM	5.6
S1_868970	1	868970	0.5	1	0.5	T	G		nonIDM	5.6
S1_868981	1	868981	0.05	0	0.05	G	T		nonIDM	5.6
S1_869000	1	869000	0	0.31	0.31	A	G	A	GlazPoly	5.6
S1_876586	1	876586	0.45	1	0.55	T	G		nonIDM	5.9
S1_876608	1	876608	0.7	1	0.3	T	A		nonIDM	5.9
S1_876617	1	876617	0.35	1	0.65	C	A		nonIDM	5.9
S1_878221	1	878221	0	1	1	A	C	A	Strict	5.9
S1_878387	1	878387	0	0.25	0.25	G	A	G	GlazPoly	5.9
S1_878406	1	878406	0	0.25	0.25	A	G	A	GlazPoly	5.9
S1_878422	1	878422	0	1	1	T	C	T	Strict	5.9
S1_880050	1	880050	0.35	0.12	0.22	A	G		nonIDM	5.9
S1_881807	1	881807	0	1	1	C	T	C	Strict	5.9
S1_881840	1	881840	0.25	0	0.25	G	C		nonIDM	5.9
S1_885211	1	885211	0.1	1	0.9	A	G		nonIDM	6
S1_885234	1	885234	0.15	0	0.15	T	C		nonIDM	6
S1_885305	1	885305	0.2	0	0.2	C	T		nonIDM	6
S1_885619	1	885619	0.7	1	0.3	A	T		nonIDM	6
S1_885944	1	885944	0.7	1	0.3	A	C		nonIDM	6
S1_885961	1	885961	0.35	1	0.65	A	T		nonIDM	6
S1_885971	1	885971	0.35	0	0.35	T	G		nonIDM	6
S1_885995	1	885995	0.15	0	0.15	T	A		nonIDM	6
S1_947465	1	947465	0	0	0	A	G		nonIDM	6.3
S1_947479	1	947479	0	1	1	T	A	T	Strict	6.3
S1_950675	1	950675	0	0.5	0.5	G	A	G	GlazPoly	6.3
S1_950680	1	950680	0	0.5	0.5	T	C	T	GlazPoly	6.3
S1_950692	1	950692	0	0.5	0.5	A	C	A	GlazPoly	6.3
S1_964392	1	964392	0	0	0	A	G		nonIDM	6.4
S1_964546	1	964546	0	0	0	G	A		nonIDM	6.4
S1_964594	1	964594	0	0	0	C	A		nonIDM	6.4
S1_970056	1	970056	0.1	1	0.9	G	A		nonIDM	6.3
S1_970119	1	970119	0	0.56	0.56	A	G	A	GlazPoly	6.3
S1_1075541	1	1075541	0.15	1	0.85	T	G		nonIDM	6.8
S1_1077841	1	1077841	0.7	1	0.3	A	T		nonIDM	6.9
S1_1077846	1	1077846	0.15	0	0.15	G	C		nonIDM	6.9
S1_1078141	1	1078141	0.25	0	0.25	T	A		nonIDM	6.9
S1_1080759	1	1080759	0	0	0	T	A		nonIDM	6.7
S1_1084450	1	1084450	0.7	1	0.3	T	C		nonIDM	6.7
S1_1084456	1	1084456	0.7	1	0.3	A	G		nonIDM	6.7
S1_1132830	1	1132830	0.65	1	0.35	T	A		nonIDM	6.9
S1_1135600	1	1135600	0.65	1	0.35	T	A		nonIDM	7.1
S1_1135693	1	1135693	0	0.19	0.19	G	A	G	GlazPoly	7.1
S1_1135712	1	1135712	0.1	0	0.1	G	A		nonIDM	7.1
S1_1135717	1	1135717	0	0	0	G	A		nonIDM	7.1
S1_1135722	1	1135722	0	0.38	0.38	T	C	T	GlazPoly	7.1
S1_1135728	1	1135728	0.2	0	0.2	C	T		nonIDM	7.1
S1_1135757	1	1135757	0.05	0	0.05	A	G		nonIDM	7.1
S1_1135777	1	1135777	0	0.44	0.44	C	T	C	GlazPoly	7.1
S1_1135811	1	1135811	0	1	1	G	C	G	Strict	7.1
S1_1136022	1	1136022	0.25	1	0.75	T	C		nonIDM	7.1
S1_1148933	1	1148933	0	0.44	0.44	A	G	A	GlazPoly	7.2
S1_1152126	1	1152126	0.2	0	0.2	T	C		nonIDM	7.2
S1_1152160	1	1152160	0	0	0	G	T		nonIDM	7.2
S1_1152190	1	1152190	0	1	1	C	G	C	Strict	7.2
S1_1152201	1	1152201	0	1	1	A	G	A	Strict	7.2
S1_1154974	1	1154974	0.05	0	0.05	C	G		nonIDM	7.3
S1_1155000	1	1155000	0.05	0	0.05	A	T		nonIDM	7.3
S1_1155014	1	1155014	0	0	0	C	T		nonIDM	7.3
S1_1155112	1	1155112	0.05	0	0.05	T	A		nonIDM	7.3
S1_1155117	1	1155117	0.05	0	0.05	A	G		nonIDM	7.3
S1_1155148	1	1155148	0.05	0	0.05	T	A		nonIDM	7.3
S1_1155187	1	1155187	0.1	0.75	0.65	G	A		nonIDM	7.3
S1_1163486	1	1163486	0	0	0	C	T		nonIDM	7.4
S1_1163492	1	1163492	0.05	1	0.95	T	C		tagIDM	7.4
S1_1174219	1	1174219	0.1	0	0.1	A	C		nonIDM	7.6
S1_1210849	1	1210849	0.65	0	0.65	A	G		nonIDM	8.4
S1_1210868	1	1210868	0.3	0	0.3	A	T		nonIDM	8.4
S1_1210902	1	1210902	0.65	1	0.35	T	C		nonIDM	8.4
S1_1211141	1	1211141	0.05	0	0.05	G	C		nonIDM	8.4
S1_1211270	1	1211270	0	1	1	A	T	A	Strict	8.5
S1_1211525	1	1211525	0.05	0	0.05	A	T		nonIDM	8.3
S1_1212882	1	1212882	0	0.25	0.25	T	A	T	GlazPoly	8.6
S1_1212969	1	1212969	0	0.25	0.25	C	T	C	GlazPoly	8.6
S1_1214719	1	1214719	0.1	0	0.1	T	G		nonIDM	8.6
S1_1216563	1	1216563	0.1	0	0.1	C	T		nonIDM	8.5
S1_1220931	1	1220931	0	0.12	0.12	G	A	G	GlazPoly	8.5
S1_1220940	1	1220940	0.15	0	0.15	A	C		nonIDM	8.5
S1_1220950	1	1220950	0.2	0.12	0.08	G	A		nonIDM	8.5
S1_1262935	1	1262935	0.1	0	0.1	T	C		nonIDM	8.7
S1_1263300	1	1263300	0	1	1	A	G	A	Strict	8.7
S1_1264653	1	1264653	0	1	1	C	A	C	Strict	8.8
S1_1267649	1	1267649	0	1	1	C	T	C	Strict	8.8
S1_1267662	1	1267662	0	1	1	C	A	C	Strict	8.8
S1_1267675	1	1267675	0	0.44	0.44	T	C	T	GlazPoly	8.8
S1_1270452	1	1270452	0	0.12	0.12	T	G	T	GlazPoly	9
S1_1270478	1	1270478	0	0.94	0.94	C	T	C	GlazPoly	9
S1_1291241	1	1291241	0.6	1	0.4	C	G		nonIDM	9.3
S1_1291900	1	1291900	0	0.19	0.19	A	C	A	GlazPoly	9.3
S1_1292012	1	1292012	0.85	0	0.85	C	T		nonIDM	9.3
S1_1292059	1	1292059	0	0.25	0.25	T	C	T	GlazPoly	9.3
S1_1292197	1	1292197	0	1	1	G	A	G	Strict	9.3
S1_1292835	1	1292835	0.6	0	0.6	A	T		nonIDM	9.3
S1_1292856	1	1292856	0	0.44	0.44	G	A	G	GlazPoly	9.3
S1_1293095	1	1293095	0	0	0	C	T		nonIDM	9.3
S1_1293114	1	1293114	0	0.69	0.69	T	A	T	GlazPoly	9.3
S1_1293126	1	1293126	0	0.5	0.5	A	G	A	GlazPoly	9.3
S1_1293144	1	1293144	0	0	0	C	T		tagIDM	9.3
S1_1293303	1	1293303	0.4	0	0.4	A	G		nonIDM	9.3
S1_1310706	1	1310706	0.4	1	0.6	T	A		nonIDM	9.5
S1_1310749	1	1310749	0	1	1	C	A	C	Strict	9.5
S1_1310762	1	1310762	0	0	0	A	C		tagIDM	9.5
S1_1310768	1	1310768	0	0.38	0.38	G	A	G	GlazPoly	9.5
S1_1312505	1	1312505	0	0.38	0.38	C	T	C	GlazPoly	9.5
S1_1313587	1	1313587	0	0	0	T	C		nonIDM	9.5
S1_1313992	1	1313992	0	1	1	A	T	A	Strict	9.5
S1_1314066	1	1314066	0.15	0	0.15	C	T		nonIDM	9.5
S1_1314094	1	1314094	0.2	0	0.2	A	C		nonIDM	9.5
S1_1314373	1	1314373	0.85	1	0.15	A	G		nonIDM	9.5
S1_1314857	1	1314857	0	1	1	C	T	C	Strict	9.5
S1_1315076	1	1315076	0	0.38	0.38	T	C	T	GlazPoly	9.5
S1_1343882	1	1343882	0.05	0	0.05	A	C		nonIDM	9.6
S1_1343892	1	1343892	0.05	0	0.05	A	G		nonIDM	9.5
S1_1345512	1	1345512	0	1	1	A	G	A	Strict	9.4
S1_1345559	1	1345559	0	0	0	T	A		nonIDM	9.4
S1_1345678	1	1345678	0	0.12	0.12	A	T	A	GlazPoly	9.4
S1_1345726	1	1345726	0	0.12	0.12	A	T	A	GlazPoly	9.4
S1_1345736	1	1345736	0	0.19	0.19	G	C	G	GlazPoly	9.4
S1_1345788	1	1345788	0.15	1	0.85	T	A		nonIDM	9.4
S1_1361323	1	1361323	0	0	0	G	A		nonIDM	9.4
S1_1361364	1	1361364	0	1	1	T	A	T	Strict	9.4
S1_1361373	1	1361373	0	1	1	G	T	G	Strict	9.4
S1_1361434	1	1361434	0.65	1	0.35	C	A		nonIDM	9.4
S1_1361440	1	1361440	0	1	1	G	C	G	Strict	9.4
S1_1361475	1	1361475	0.65	1	0.35	A	G		nonIDM	9.4
S1_1361501	1	1361501	0	1	1	A	G	A	Strict	9.4
S1_1361508	1	1361508	0	1	1	G	A	G	Strict	9.4
S1_1361517	1	1361517	0	1	1	T	G	T	Strict	9.4
S1_1361524	1	1361524	0.1	0.5	0.4	T	C		nonIDM	9.4
S1_1361585	1	1361585	0	0.25	0.25	T	C	T	GlazPoly	9.4
S1_1363081	1	1363081	0	0	0	T	A		nonIDM	9.5
S1_1367954	1	1367954	0	0	0	C	T		nonIDM	9.5
S1_1374141	1	1374141	0	0	0	T	C		nonIDM	9.7
S1_1374420	1	1374420	0.2	1	0.8	C	T		nonIDM	9.7
S1_1374438	1	1374438	0.2	0	0.2	T	A		nonIDM	9.7
S1_1376070	1	1376070	0.2	1	0.8	A	G		nonIDM	9.6
S1_1376109	1	1376109	0	0.88	0.88	C	T	C	GlazPoly	9.6
S1_1376187	1	1376187	0	0	0	T	C		nonIDM	9.6
S1_1376196	1	1376196	0.05	0	0.05	T	G		nonIDM	9.6
S1_1380992	1	1380992	0	0.12	0.12	C	A	C	GlazPoly	9.7
S1_1381958	1	1381958	0.65	1	0.35	A	T		nonIDM	9.7
S1_1381966	1	1381966	0.05			T	A		nonIDM	9.7
S1_1381983	1	1381983	0	0	0	G	A		nonIDM	9.7
S1_1411716	1	1411716	0.25	0	0.25	A	T		nonIDM	10
S1_1419661	1	1419661	0	0	0	G	A		nonIDM	10.2
S1_1420950	1	1420950	0	0	0	T	G		nonIDM	10.3
S1_1421059	1	1421059	0	0	0	C	A		nonIDM	10.3
S1_1421085	1	1421085	0.75	0	0.75	C	T		nonIDM	10.3
S1_1427074	1	1427074	0	0.88	0.88	C	A	C	GlazPoly	10.4
S1_1427092	1	1427092	0.55	1	0.45	A	T		nonIDM	10.4
S1_1427103	1	1427103	0	0.88	0.88	G	A	G	GlazPoly	10.4
S1_1427108	1	1427108	0	0	0	G	A		nonIDM	10.4
S1_1427241	1	1427241	0	0	0	A	G		nonIDM	10.4
S1_1427259	1	1427259	0	0.88	0.88	G	C	G	GlazPoly	10.4
S1_1427518	1	1427518	0.2	0	0.2	G	A		nonIDM	10.4
S1_1427538	1	1427538	0.2	0	0.2	C	G		nonIDM	10.4
S1_1430528	1	1430528	0	1	1	T	C	T	Strict	10.5
S1_1430540	1	1430540	0.1	0	0.1	T	C		nonIDM	10.5
S1_1430546	1	1430546	0	0.06	0.06	G	A	G	GlazPoly	10.5
S1_1437922	1	1437922	0.05	0.94	0.89	A	G		nonIDM	10.6
S1_1437961	1	1437961	0			T	G		nonIDM	10.6
S1_1438142	1	1438142	0.2	0	0.2	A	C		nonIDM	10.6
S1_1438155	1	1438155	0.15	0	0.15	A	G		nonIDM	10.6
S1_1438161	1	1438161	0.05	0	0.05	C	A		nonIDM	10.6
S1_1438203	1	1438203	0.05	0.06	0.01	A	C		nonIDM	10.6
S1_1454085	1	1454085	0.2	0	0.2	C	T		nonIDM	10.9
S1_1454229	1	1454229	0.2	0	0.2	A	G		nonIDM	10.9
S1_1454465	1	1454465	0.2	0	0.2	A	G		nonIDM	10.9
S1_1457519	1	1457519	0	0	0	C	G		nonIDM	11
S1_1538986	1	1538986	0.55	0	0.55	T	C		nonIDM	13.3
S1_1539000	1	1539000	0.55	0	0.55	C	T		nonIDM	13.4
S1_1542376	1	1542376	0	0	0	G	A		nonIDM	13
S1_1542432	1	1542432	0	1	1	T	C	T	Strict	13
S1_1542453	1	1542453	0	1	1	C	T	C	Strict	13
S1_1556776	1	1556776	0	0	0	T	C		nonIDM	14.1
S1_1556859	1	1556859	0	0.38	0.38	T	G	T	GlazPoly	14.1
S1_1556864	1	1556864	0	1	1	G	T	G	Strict	14.1
S1_1561623	1	1561623	0	1	1	G	A	G	Strict	13.6
S1_1561635	1	1561635	0	1	1	C	G	C	Strict	13.6
S1_1561645	1	1561645	0	0	0	G	A		nonIDM	13.6
S1_1561653	1	1561653	0	0	0	C	T		nonIDM	13.6
S1_1561683	1	1561683	0	0	0	C	G		nonIDM	13.5
S1_1561688	1	1561688	0	1	1	G	T	G	Strict	13.5
S1_1561696	1	1561696	0	1	1	A	G	A	Strict	13.5
S1_1561702	1	1561702	0	0	0	A	C		nonIDM	13.5
S1_1561732	1	1561732	0	0	0	A	T		nonIDM	13.5
S1_1561737	1	1561737	0	0.08	0.08	G	A	G	GlazPoly	13.5
S1_1561773	1	1561773	0.1	0.12	0.02	C	A		nonIDM	13.5
S1_1561784	1	1561784	0	0.88	0.88	A	C	A	GlazPoly	13.5
S1_1561921	1	1561921	0	0.38	0.38	C	T	C	GlazPoly	13.4
S1_1561965	1	1561965	0	1	1	G	C	G	Strict	13.4
S1_1566091	1	1566091	0.1	0	0.1	C	G		nonIDM	12.7
S1_1566101	1	1566101	0.35	0	0.35	A	G		nonIDM	12.7
S1_1576656	1	1576656	0.05	1	0.95	A	G		nonIDM	12.6
S1_1576663	1	1576663	0.05	1	0.95	C	A		nonIDM	12.6
S1_1576672	1	1576672	0.05	1	0.95	A	G		nonIDM	12.6
S1_1576678	1	1576678	0	0	0	G	A		nonIDM	12.6
S1_1576710	1	1576710	0.05	1	0.95	C	T		nonIDM	12.6
S1_1576962	1	1576962	0	0	0	C	G		nonIDM	12.6
S1_1576996	1	1576996	0.45	0.44	0.01	C	A		nonIDM	12.6
S1_1577002	1	1577002	0.45	0.06	0.39	G	T		nonIDM	12.6
S1_1577025	1	1577025	0.45	0.06	0.39	T	A		nonIDM	12.6
S1_1583020	1	1583020	0.5	0	0.5	C	A		nonIDM	12.2
S1_1583036	1	1583036	0	0	0	G	A		nonIDM	12.2
S1_1583247	1	1583247	0.4	0	0.4	C	T		nonIDM	12.2
S1_1583263	1	1583263	0	0	0	C	T		nonIDM	12.2
S1_1584915	1	1584915	0.1	0	0.1	A	T		nonIDM	12.4
S1_1584942	1	1584942	0.4	0	0.4	A	C		nonIDM	12.4
S1_1585093	1	1585093	0.4	0	0.4	T	G		nonIDM	12.5
S1_1585100	1	1585100	0	0	0	T	C		nonIDM	12.6
S1_1585120	1	1585120	0.4	0	0.4	T	C		nonIDM	12.6
S1_1585147	1	1585147	0.4	0.5	0.1	G	A		nonIDM	12.6
S1_1585775	1	1585775	0.4	0	0.4	A	C		nonIDM	12.3
S1_1585782	1	1585782	0.4	1	0.6	G	A		nonIDM	12.3
S1_1585794	1	1585794	0.4	0	0.4	T	C		nonIDM	12.3
S1_1585827	1	1585827	0	0	0	A	G		nonIDM	12.3
S1_1585840	1	1585840	0.4	0.44	0.04	T	C		nonIDM	12.3
S1_1585851	1	1585851	0.15	0	0.15	A	T		nonIDM	12.3
S1_1585867	1	1585867	0.4	0	0.4	T	C		nonIDM	12.3
S1_1586833	1	1586833	0.1	1	0.9	G	C		nonIDM	12.2
S1_1586839	1	1586839	0	0	0	A	G		nonIDM	12.2
S1_1586863	1	1586863	0.1	1	0.9	A	G		nonIDM	12.2
S1_1586870	1	1586870	0	0.12	0.12	A	C	A	GlazPoly	12.2
S1_1588485	1	1588485	0	1	1	C	T	C	Strict	12.7
S1_1588728	1	1588728	0.1	1	0.9	C	T		nonIDM	12.7
S1_1589412	1	1589412	0.1	0	0.1	C	A		nonIDM	12.6
S1_1589423	1	1589423	0.1	0	0.1	T	G		nonIDM	12.6
S1_1589434	1	1589434	0	0	0	C	G		nonIDM	12.7
S1_1589494	1	1589494	0.1	0	0.1	A	G		nonIDM	12.7
S1_1589597	1	1589597	0	0	0	C	G		nonIDM	12.7
S1_1589652	1	1589652	0	0	0	T	G		nonIDM	12.7
S1_1590008	1	1590008	0.1	0	0.1	G	T		nonIDM	12.6
S1_1590018	1	1590018	0.05	0	0.05	G	A		nonIDM	12.6
S1_1590031	1	1590031	0	0	0	T	C		nonIDM	12.6
S1_1590037	1	1590037	0.1	0	0.1	A	G		nonIDM	12.6
S1_1590069	1	1590069	0.5	0	0.5	T	A		nonIDM	12.6
S1_1615784	1	1615784	0	0.38	0.38	A	C	A	GlazPoly	12.5
S1_1615831	1	1615831	0	0	0	T	A		nonIDM	12.5
S1_1615908	1	1615908	0	1	1	C	A	C	Strict	12.5
S1_1615914	1	1615914	0	0	0	C	G		nonIDM	12.5
S1_1616585	1	1616585	0	0.38	0.38	T	A	T	GlazPoly	12.5
S1_1616596	1	1616596	0	0.62	0.62	G	A	G	GlazPoly	12.5
S1_1616612	1	1616612	0	0.38	0.38	C	T	C	GlazPoly	12.5
S1_1616652	1	1616652	0.15	1	0.85	C	T		nonIDM	12.5
S1_1617549	1	1617549	0	0.38	0.38	T	C	T	GlazPoly	12.6
S1_1617596	1	1617596	0.15	0	0.15	T	A		nonIDM	12.6
S1_1617693	1	1617693	0.4	0	0.4	A	C		nonIDM	12.6
S1_1618982	1	1618982	0	1	1	A	G	A	Strict	12.9
S1_1623128	1	1623128	0.05	0	0.05	C	G		nonIDM	12.6
S1_1623165	1	1623165	0	1	1	A	G	A	Strict	12.6
S1_1623174	1	1623174	0	0	0	C	A		nonIDM	12.6
S1_1646082	1	1646082	0.1	0	0.1	T	A		nonIDM	13.2
S1_1646727	1	1646727	0.05	0.12	0.08	C	A		nonIDM	13.2
S1_1646754	1	1646754	0.65	0	0.65	C	A		nonIDM	13.2
S1_1648969	1	1648969	0.4	0	0.4	A	T		nonIDM	13.3
S1_1653285	1	1653285	0	1	1	A	G	A	Strict	13.5
S1_1653315	1	1653315	0	0	0	A	C		nonIDM	13.5
S1_1653403	1	1653403	0.3	0	0.3	G	C		nonIDM	13.5
S1_1653436	1	1653436	0	0.38	0.38	T	C	T	GlazPoly	13.5
S1_1653441	1	1653441	0	0.38	0.38	A	G	A	GlazPoly	13.5
S1_1653449	1	1653449	0	0	0	T	G		nonIDM	13.5
S1_1709772	1	1709772	0.15	0	0.15	C	A		nonIDM	15.4
S1_1709927	1	1709927	0.2	0	0.2	A	T		nonIDM	15.4
S1_1709934	1	1709934	0	0	0	C	T		nonIDM	15.4
S1_1709948	1	1709948	0.2	0.44	0.24	C	G		nonIDM	15.4
S1_1709964	1	1709964	0.1	0.44	0.34	A	G		nonIDM	15.4
S1_1710835	1	1710835	0.05	0	0.05	T	C		nonIDM	15.6
S1_1710877	1	1710877	0	0	0	A	G		nonIDM	15.6
S1_1710938	1	1710938	0.1	0	0.1	C	T		nonIDM	15.6
S1_1725912	1	1725912	0.35	0	0.35	C	T		nonIDM	16.1
S1_1725941	1	1725941	0	0	0	G	T		nonIDM	16.1
S1_1725996	1	1725996	0.35	0	0.35	A	T		nonIDM	16.1
S1_1726035	1	1726035	0.05	0	0.05	T	A		nonIDM	16.1
S1_1764397	1	1764397	0	0.57	0.57	A	G	A	GlazPoly	16.9
S1_1764419	1	1764419	0.15	0	0.15	C	A		nonIDM	16.9
S1_1764542	1	1764542	0.15	1	0.85	C	A		nonIDM	16.9
S1_1764579	1	1764579	0	1	1	C	T	C	Strict	16.9
S1_1764584	1	1764584	0.1	0	0.1	C	T		nonIDM	16.9
S1_1764657	1	1764657	0	0	0	T	G		nonIDM	16.9
S1_1764662	1	1764662	0	1	1	G	A	G	Strict	16.9
S1_1764701	1	1764701	0	1	1	T	C	T	Strict	16.9
S1_1764757	1	1764757	0	0	0	A	G		nonIDM	16.9
S1_1765222	1	1765222	0.1	0	0.1	C	T		nonIDM	16.9
S1_1765256	1	1765256	0.1	0	0.1	C	T		nonIDM	16.9
S1_1765328	1	1765328	0	0	0	G	A		nonIDM	16.9
S1_1798281	1	1798281	0	0.31	0.31	A	C	A	GlazPoly	16.9
S1_1798309	1	1798309	0	0.31	0.31	A	G	A	GlazPoly	16.9
S1_1798338	1	1798338	0.05	0	0.05	T	A		nonIDM	16.9
S1_1798348	1	1798348	0	0.06	0.06	A	G	A	GlazPoly	16.9
S1_1808116	1	1808116	0	0	0	T	A		nonIDM	17.7
S1_1974849	1	1974849	0.5	0	0.5	C	A		nonIDM	19.5
S1_1975092	1	1975092	0.5	0	0.5	A	C		nonIDM	19.4
S1_1976249	1	1976249	1	0.56	0.44	C	T	T	GlazPoly	18.6
S1_1976258	1	1976258	0.3	0	0.3	C	T		nonIDM	18.5
S1_1989947	1	1989947	0	0	0	A	T		nonIDM	19.1
S1_1990070	1	1990070	0	0	0	T	A		nonIDM	19.1
S1_1990255	1	1990255	0	0.25	0.25	C	T	C	GlazPoly	19.1
S1_1996103	1	1996103	0	0	0	C	T		nonIDM	18.9
S1_1996234	1	1996234	0.4	1	0.6	T	C		nonIDM	18.9
S1_1996243	1	1996243	0.3	0	0.3	C	T		nonIDM	18.9
S1_1996258	1	1996258	0	0	0	T	C		nonIDM	18.9
S1_1996285	1	1996285	0	1	1	A	C	A	Strict	18.9
S1_2022817	1	2022817	0.1	0	0.1	A	G		nonIDM	17.9
S1_2022859	1	2022859	0.65	0	0.65	G	A		nonIDM	17.9
S1_2022883	1	2022883	0	0.12	0.12	C	T	C	GlazPoly	17.9
S1_2022907	1	2022907	0	1	1	G	A	G	Strict	17.9
S1_2022932	1	2022932	0.2	0	0.2	A	C		nonIDM	17.9
S1_2022966	1	2022966	0.25	0	0.25	C	G		nonIDM	17.9
S1_2051192	1	2051192	0.15	0.31	0.16	T	G		nonIDM	18.2
S1_2051274	1	2051274	0.2	0	0.2	T	C		nonIDM	18.3
S1_2051661	1	2051661	0.7	1	0.3	G	A		nonIDM	18.3
S1_2051701	1	2051701	0	0.31	0.31	A	G	A	GlazPoly	18.3
S1_2051724	1	2051724	0	0.06	0.06	A	G	A	GlazPoly	18.3
S1_2073351	1	2073351	0.6	0	0.6	G	A		nonIDM	18.8
S1_2073379	1	2073379	0.05	0	0.05	C	T		nonIDM	18.8
S1_2073468	1	2073468	0	1	1	G	A	G	Strict	18.8
S1_2073510	1	2073510	0	0	0	C	T		nonIDM	18.8
S1_2095232	1	2095232	0	0	0	C	T		nonIDM	18.9
S1_2095341	1	2095341	0	1	1	G	A	G	Strict	18.9
S1_2095354	1	2095354	0	1	1	C	A	C	Strict	18.9
S1_2095379	1	2095379	0	1	1	C	G	C	Strict	18.9
S1_2095388	1	2095388	0	1	1	A	C	A	Strict	18.9
S1_2095406	1	2095406	0	1	1	G	T	G	Strict	18.9
S1_2095570	1	2095570	0.1	1	0.9	T	C		nonIDM	18.9
S1_2095579	1	2095579	0.1	0	0.1	A	G		nonIDM	18.9
S1_2103812	1	2103812	0	0.12	0.12	G	A	G	GlazPoly	19.3
S1_2103977	1	2103977	0	1	1	G	A	G	Strict	19.3
S1_2103988	1	2103988	0	0.19	0.19	C	G	C	GlazPoly	19.3
S1_2104036	1	2104036	0.4	1	0.6	A	T		nonIDM	19.3
S1_2104050	1	2104050	0	0	0	G	C		nonIDM	19.3
S1_2104056	1	2104056	0	0.75	0.75	T	G	T	GlazPoly	19.3
S1_2104061	1	2104061	0.4	0.06	0.34	C	G		nonIDM	19.3
S1_2104071	1	2104071	0.25	0	0.25	T	G		nonIDM	19.3
S1_2104111	1	2104111	0	0.88	0.88	T	C	T	GlazPoly	19.3
S1_2142209	1	2142209	0	0.88	0.88	A	G	A	GlazPoly	20.3
S1_2142358	1	2142358	0.65	1	0.35	T	C		nonIDM	20.3
S1_2142379	1	2142379	0.5	0	0.5	A	G		nonIDM	20.3
S1_2147171	1	2147171	0	1	1	C	G	C	Strict	20.3
S1_2147232	1	2147232	0.1	0	0.1	T	G		nonIDM	20.3
S1_2147700	1	2147700	0.15	1	0.85	A	T		nonIDM	20.3
S1_2147889	1	2147889	0.1	0.12	0.02	A	G		nonIDM	20.3
S1_2147894	1	2147894	0.15	0.81	0.66	G	A		nonIDM	20.3
S1_2150280	1	2150280	0	1	1	A	G	A	Strict	20.3
S1_2150891	1	2150891	0.05	0	0.05	G	T		nonIDM	20.4
S1_2155453	1	2155453	0	1	1	A	C	A	Strict	20.4
S1_2155483	1	2155483	0.65	1	0.35	C	A		nonIDM	20.4
S1_2155529	1	2155529	0.1	0	0.1	G	A		nonIDM	20.4
S1_2164798	1	2164798	0.05	0	0.05	C	A		nonIDM	20.6
S1_2164879	1	2164879	0.05	0	0.05	T	C		nonIDM	20.6
S1_2179164	1	2179164	0.55	0	0.55	G	T		nonIDM	20.6
S1_2179198	1	2179198	0.55	0	0.55	A	C		nonIDM	20.6
S1_2185432	1	2185432	0.4	0	0.4	T	A		nonIDM	20.7
S1_2185447	1	2185447	0	1	1	T	G	T	Strict	20.7
S1_2197841	1	2197841	0.05	0	0.05	C	T		nonIDM	21
S1_2197849	1	2197849	0.33	0	0.33	G	C		nonIDM	21
S1_2197889	1	2197889	0	0.12	0.12	A	G	A	GlazPoly	21
S1_2198022	1	2198022	0.2	0.31	0.11	T	C		nonIDM	21.1
S1_2198062	1	2198062	0.35	0	0.35	T	C		nonIDM	21.1
S1_2198073	1	2198073	0	0	0	C	T		nonIDM	21.1
S1_2198081	1	2198081	0.35	0	0.35	G	A		nonIDM	21.1
S1_2198088	1	2198088	0.05	0	0.05	A	G		nonIDM	21.1
S1_2198095	1	2198095	0.35	0	0.35	G	C		nonIDM	21.1
S1_2198129	1	2198129	0.1	0.12	0.02	A	G		nonIDM	21.1
S1_2198138	1	2198138	0.4	0.69	0.29	G	A		nonIDM	21.1
S1_2198148	1	2198148	0.05	0	0.05	A	G		nonIDM	21.1
S1_2198178	1	2198178	0	0.25	0.25	G	A	G	GlazPoly	21.1
S1_2198183	1	2198183	0	0	0	A	C		nonIDM	21.1
S1_2198190	1	2198190	0	0.31	0.31	A	G	A	GlazPoly	21.1
S1_2198202	1	2198202	0.15	0	0.15	A	T		nonIDM	21.1
S1_2198213	1	2198213	0	0.31	0.31	T	A	T	GlazPoly	21.1
S1_2198237	1	2198237	0.2	0	0.2	A	G		nonIDM	21.1
S1_2198283	1	2198283	0.5	1	0.5	A	G		nonIDM	21.1
S1_2198291	1	2198291	0.05	0	0.05	G	A		nonIDM	21.1
S1_2208776	1	2208776	0.15	0.31	0.16	T	G		nonIDM	21.3
S1_2211946	1	2211946	0.35	1	0.65	A	C		nonIDM	21.3
S1_2215080	1	2215080	0.15	0.36	0.21	A	G		nonIDM	21.4
S1_2215105	1	2215105	0.4	0	0.4	C	G		nonIDM	21.4
S1_2215123	1	2215123	0.35	0	0.35	T	G		nonIDM	21.4
S1_2215354	1	2215354	0	0.31	0.31	T	C	T	GlazPoly	21.4
S1_2215376	1	2215376	0.15	0	0.15	G	A		nonIDM	21.4
S1_2215449	1	2215449	0.05	0	0.05	A	C		nonIDM	21.4
S1_2215475	1	2215475	0.05	1	0.95	G	T		nonIDM	21.4
S1_2215483	1	2215483	0.25	0	0.25	C	T		nonIDM	21.4
S1_2215489	1	2215489	0	0.19	0.19	A	C	A	GlazPoly	21.4
S1_2215494	1	2215494	0	0	0	G	A		nonIDM	21.4
S1_2215521	1	2215521	0.05	0.69	0.64	T	C		tagIDM	21.4
S1_2215562	1	2215562	0	0.25	0.25	T	A	T	GlazPoly	21.4
S1_2215697	1	2215697	0	0.12	0.12	A	C	A	GlazPoly	21.4
S1_2215708	1	2215708	0.1	0	0.1	A	G		nonIDM	21.4
S1_2215729	1	2215729	0	0	0	T	A		nonIDM	21.4
S1_2215782	1	2215782	0.1	0	0.1	G	A		nonIDM	21.4
S1_2215793	1	2215793	0.1	0.88	0.78	C	T		nonIDM	21.4
S1_2215798	1	2215798	0.1	0.86	0.76	A	C		nonIDM	21.4
S1_2217275	1	2217275	0.05	0	0.05	T	C		nonIDM	21.4
S1_2220167	1	2220167	0.15	0	0.15	G	C		nonIDM	21.5
S1_2220189	1	2220189	0.05	0.38	0.32	A	G		nonIDM	21.5
S1_2220237	1	2220237	0.35	0	0.35	T	C		nonIDM	21.5
S1_2223141	1	2223141	0.1	0	0.1	G	A		nonIDM	21.5
S1_2223150	1	2223150	0	0.19	0.19	T	G	T	GlazPoly	21.5
S1_2227321	1	2227321	0	0.19	0.19	G	A	G	GlazPoly	21.5
S1_2227397	1	2227397	0.05	0	0.05	T	C		nonIDM	21.5
S1_2227407	1	2227407	0.3	1	0.7	C	T		nonIDM	21.5
S1_2227435	1	2227435	0	0.6	0.6	A	T	A	GlazPoly	21.5
S1_2227444	1	2227444	0	0.94	0.94	T	C	T	GlazPoly	21.5
S1_2227465	1	2227465	0	0.62	0.62	T	C	T	GlazPoly	21.5
S1_2227497	1	2227497	0.2	0	0.2	A	G		nonIDM	21.5
S1_2227826	1	2227826	0.05	0	0.05	G	A		nonIDM	21.5
S1_2227840	1	2227840	0	0.57	0.57	A	G	A	GlazPoly	21.5
S1_2227858	1	2227858	0.25	0.5	0.25	G	A		nonIDM	21.5
S1_2227885	1	2227885	0	1	1	A	T	A	Strict	21.5
S1_2227893	1	2227893	0	1	1	G	A	G	Strict	21.5
S1_2227898	1	2227898	0.2	0	0.2	C	G		nonIDM	21.5
S1_2227906	1	2227906	0	0.25	0.25	T	C	T	GlazPoly	21.5
S1_2227923	1	2227923	0.05	0	0.05	C	A		nonIDM	21.5
S1_2228074	1	2228074	0.22	1	0.78	C	G		nonIDM	21.5
S1_2228101	1	2228101	0.05	0	0.05	C	T		nonIDM	21.5
S1_2228106	1	2228106	0.1	0	0.1	G	A		nonIDM	21.5
S1_2228111	1	2228111	0.05	0.44	0.39	T	C		nonIDM	21.5
S1_2228142	1	2228142	0.3	0	0.3	A	G		nonIDM	21.5
S1_2228156	1	2228156	0.1	0	0.1	T	G		nonIDM	21.5
S1_2228193	1	2228193	0.15	0.38	0.22	T	C		nonIDM	21.5
S1_2230748	1	2230748	0	1	1	C	A	C	Strict	21.5
S1_2230764	1	2230764	0	0	0	T	C		nonIDM	21.5
S1_2234457	1	2234457	0.05	0	0.05	C	G		nonIDM	21.3
S1_2235988	1	2235988	0	0.25	0.25	C	T	C	GlazPoly	21.4
S1_2237583	1	2237583	0.1	0	0.1	T	C		nonIDM	21.4
S1_2237619	1	2237619	0	0.25	0.25	A	G	A	GlazPoly	21.4
S1_2239276	1	2239276	0	0	0	C	T		nonIDM	21.5
S1_2250748	1	2250748	0	0	0	G	A		nonIDM	21.6
S1_2250883	1	2250883	0	0	0	T	C		nonIDM	21.6
S1_2253132	1	2253132	0	0	0	T	C		nonIDM	21.6
S1_2257107	1	2257107	0	0.06	0.06	A	G	A	GlazPoly	21.5
S1_2257120	1	2257120	0	0	0	A	G		nonIDM	21.5
S1_2257152	1	2257152	0	0	0	T	C		nonIDM	21.5
S1_2281969	1	2281969	0.05	0	0.05	C	T		nonIDM	20.4
S1_2282013	1	2282013	0	0.38	0.38	C	T	C	GlazPoly	20.4
S1_2282036	1	2282036	0	0	0	A	T		nonIDM	20.4
S1_2282042	1	2282042	0	1	1	A	G	A	Strict	20.4
S1_2282061	1	2282061	0.6	0	0.6	G	C		nonIDM	20.4
S1_2282113	1	2282113	0.15	0	0.15	G	A		nonIDM	20.4
S1_2282126	1	2282126	0.15	0	0.15	A	G		nonIDM	20.4
S1_2282138	1	2282138	0	0	0	G	A		nonIDM	20.4
S1_2282143	1	2282143	0.75	0	0.75	A	T		nonIDM	20.4
S1_2282281	1	2282281	0.25	1	0.75	T	C		nonIDM	20.4
S1_2282651	1	2282651	0.55	0	0.55	A	G		nonIDM	20.3
S1_2282698	1	2282698	0.3	0	0.3	C	G		nonIDM	20.3
S1_2365691	1	2365691	0	1	1	C	T	C	Strict	21.7
S1_2365716	1	2365716	0	0	0	G	A		nonIDM	21.7
S1_2365727	1	2365727	0.15	0	0.15	C	G		nonIDM	21.7
S1_2365747	1	2365747	0	0.31	0.31	T	A	T	GlazPoly	21.7
S1_2365947	1	2365947	0	0	0	A	G		nonIDM	21.7
S1_2366020	1	2366020	0	1	1	T	C	T	Strict	21.7
S1_2386692	1	2386692	0	0	0	T	C		nonIDM	21.8
S1_2386706	1	2386706	0	0	0	C	T		nonIDM	21.8
S1_2386742	1	2386742	0	0	0	C	T		nonIDM	21.8
S1_2386777	1	2386777	0	0	0	T	A		nonIDM	21.8
S1_2386783	1	2386783	0	0	0	G	C		nonIDM	21.8
S1_2391459	1	2391459	0.6	0.75	0.15	A	G		nonIDM	22
S1_2391483	1	2391483	0.05	0.06	0.01	G	T		nonIDM	21.8
S1_2391503	1	2391503	0.6	0.94	0.34	A	G		nonIDM	21.8
S1_2411447	1	2411447	0	0.44	0.44	A	G	A	GlazPoly	22.8
S1_2411480	1	2411480	0	0.12	0.12	G	A	G	GlazPoly	22.8
S1_2436296	1	2436296	0	0	0	G	A		nonIDM	23
S1_2436303	1	2436303	0.1	0	0.1	C	G		nonIDM	23
S1_2459395	1	2459395	0	0	0	T	C		nonIDM	23.4
S1_2459407	1	2459407	0.05	0	0.05	A	T		nonIDM	23.4
S1_2459432	1	2459432	0.3	1	0.7	A	T		nonIDM	23.4
S1_2461452	1	2461452	0.3	0	0.3	A	G		nonIDM	23.4
S1_2462391	1	2462391	0	0.06	0.06	C	A	C	GlazPoly	23.4
S1_2462459	1	2462459	0	0	0	T	A		nonIDM	23.4
S1_2462513	1	2462513	0	0	0	C	A		nonIDM	23.4
S1_2462652	1	2462652	0.3	0	0.3	A	G		nonIDM	23.4
S1_2462660	1	2462660	0.15	0	0.15	G	C		nonIDM	23.4
S1_2482145	1	2482145	0	0.38	0.38	A	G	A	GlazPoly	23.6
S1_2483181	1	2483181	0.1	0	0.1	G	A		nonIDM	23.6
S1_2483412	1	2483412	0.65	0.69	0.04	T	C		nonIDM	23.6
S1_2483456	1	2483456	0	0.69	0.69	C	T	C	GlazPoly	23.6
S1_2483473	1	2483473	0.1	0	0.1	C	A		nonIDM	23.6
S1_2483494	1	2483494	0	0.12	0.12	T	C	T	GlazPoly	23.6
S1_2483526	1	2483526	0	0	0	A	T		nonIDM	23.6
S1_2489839	1	2489839	0.35	1	0.65	A	G		nonIDM	23.4
S1_2489881	1	2489881	0	0.06	0.06	G	A	G	GlazPoly	23.5
S1_2490119	1	2490119	0	0.38	0.38	G	T	G	GlazPoly	23.5
S1_2490180	1	2490180	0	0	0	C	T		nonIDM	23.5
S1_2490221	1	2490221	0	1	1	T	C	T	Strict	23.5
S1_2490392	1	2490392	0	0	0	A	G		nonIDM	23.6
S1_2490406	1	2490406	0	0	0	A	C		nonIDM	23.6
S1_2490431	1	2490431	0	1	1	C	T	C	Strict	23.6
S1_2490438	1	2490438	0	0.56	0.56	A	C	A	GlazPoly	23.6
S1_2490450	1	2490450	0	0	0	G	A		nonIDM	23.6
S1_2490474	1	2490474	0	0	0	G	A		nonIDM	23.6
S1_2490508	1	2490508	0.4	0	0.4	C	T		nonIDM	23.6
S1_2490577	1	2490577	0	0	0	C	T		nonIDM	23.6
S1_2490668	1	2490668	0.1	0	0.1	C	G		nonIDM	23.6
S1_2490681	1	2490681	0.1	0	0.1	G	T		nonIDM	23.6
S1_2498025	1	2498025	0	0.62	0.62	A	G	A	GlazPoly	23.7
S1_2501166	1	2501166	0.15	0	0.15	G	A		nonIDM	23.8
S1_2501179	1	2501179	0	0	0	G	T		nonIDM	23.8
S1_2501192	1	2501192	0.25	0	0.25	C	A		nonIDM	23.8
S1_2501203	1	2501203	0	0.25	0.25	C	T	C	GlazPoly	23.8
S1_2501409	1	2501409	0	1	1	A	G	A	Strict	23.8
S1_2502011	1	2502011	0.2	0	0.2	T	G		nonIDM	23.8
S1_2502017	1	2502017	0.2	0	0.2	T	C		nonIDM	23.8
S1_2502219	1	2502219	0.4	0.69	0.29	C	G		nonIDM	23.8
S1_2502227	1	2502227	0	0	0	A	T		nonIDM	23.8
S1_2582299	1	2582299	0.35	0.31	0.04	C	T		nonIDM	24.2
S1_2582581	1	2582581	0	1	1	G	C	G	Strict	24.2
S1_2595032	1	2595032	0	1	1	C	T	C	Strict	24.3
S1_2595139	1	2595139	0.1	0	0.1	G	T		nonIDM	24.3
S1_2597780	1	2597780	0	1	1	A	C	A	Strict	24.3
S1_2602697	1	2602697	0	0	0	G	T		nonIDM	24.3
S1_2602733	1	2602733	0	0	0	T	C		nonIDM	24.3
S1_2602741	1	2602741	0.5	0	0.5	G	A		nonIDM	24.3
S1_2605155	1	2605155	0	0.94	0.94	A	C	A	GlazPoly	24.3
S1_2605178	1	2605178	0.05	0	0.05	T	A		nonIDM	24.3
S1_2605198	1	2605198	0.05	1	0.95	C	G		nonIDM	24.3
S1_2605211	1	2605211	0	0	0	A	G		nonIDM	24.3
S1_2605261	1	2605261	0.45	0	0.45	A	G		nonIDM	24.3
S1_2615428	1	2615428	0	1	1	A	G	A	Strict	24.4
S1_2615444	1	2615444	0.05	0	0.05	G	T		nonIDM	24.4
S1_2615540	1	2615540	0	0.31	0.31	G	C	G	GlazPoly	24.4
S1_2615569	1	2615569	0	1	1	G	A	G	Strict	24.4
S1_2615591	1	2615591	0	1	1	A	T	A	Strict	24.4
S1_2620616	1	2620616	0.1	0	0.1	T	C		nonIDM	24.5
S1_2620622	1	2620622	0	0.12	0.12	T	C	T	GlazPoly	24.5
S1_2620628	1	2620628	0.1	0	0.1	A	G		nonIDM	24.5
S1_2620642	1	2620642	0.05	0.12	0.08	A	G		nonIDM	24.5
S1_2620647	1	2620647	0.3	0	0.3	T	C		nonIDM	24.5
S1_2620710	1	2620710	0	1	1	A	G	A	Strict	24.5
S1_2620715	1	2620715	0.05	0	0.05	C	T		nonIDM	24.5
S1_2620726	1	2620726	0.05	0	0.05	A	G		nonIDM	24.5
S1_2620763	1	2620763	0	1	1	C	T	C	Strict	24.5
S1_2620771	1	2620771	0.55	1	0.45	G	A		nonIDM	24.5
S1_2628090	1	2628090	0	0	0	T	G		nonIDM	24.6
S1_2630749	1	2630749	0.45	1	0.55	C	A		nonIDM	24.6
S1_2630761	1	2630761	0	0	0	G	A		nonIDM	24.6
S1_2630770	1	2630770	0.1	0	0.1	G	A		nonIDM	24.6
S1_2630869	1	2630869	0.1	0	0.1	A	G		nonIDM	24.6
S1_2630876	1	2630876	0.1	0	0.1	G	A		nonIDM	24.6
S1_2630920	1	2630920	0.1	0	0.1	A	G		nonIDM	24.6
S1_2641668	1	2641668	0	0.31	0.31	A	T	A	GlazPoly	24.5
S1_2643261	1	2643261	0.5	0	0.5	A	G		nonIDM	24.3
S1_2643309	1	2643309	0.5	0	0.5	C	T		nonIDM	24.3
S1_2650773	1	2650773	0.3	0	0.3	C	A		nonIDM	24.3
S1_2650809	1	2650809	0	0	0	A	G		nonIDM	24.3
S1_2650821	1	2650821	0.3	0	0.3	G	A		nonIDM	24.3
S1_2653030	1	2653030	0	0.88	0.88	A	C	A	GlazPoly	24.3
S1_2653042	1	2653042	0	1	1	C	G	C	Strict	24.3
S1_2653047	1	2653047	0	1	1	C	T	C	Strict	24.3
S1_2655159	1	2655159	0.4	0	0.4	A	G		nonIDM	24.3
S1_2655164	1	2655164	0	0	0	C	T		nonIDM	24.3
S1_2655174	1	2655174	1	0.44	0.56	T	C	C	GlazPoly	24.3
S1_2655180	1	2655180	0	0	0	G	T		nonIDM	24.3
S1_2660470	1	2660470	0	1	1	T	C	T	Strict	24.4
S1_2660485	1	2660485	0	1	1	G	A	G	Strict	24.4
S1_2660539	1	2660539	0	1	1	G	C	G	Strict	24.4
S1_2660544	1	2660544	0.25	0	0.25	T	C		nonIDM	24.4
S1_2667350	1	2667350	0.35	0	0.35	C	T		nonIDM	24.3
S1_2667386	1	2667386	0	0	0	T	C		nonIDM	24.3
S1_2667416	1	2667416	0.25	0	0.25	C	G		nonIDM	24.3
S1_2667423	1	2667423	0	1	1	C	A	C	Strict	24.3
S1_2667430	1	2667430	0	0	0	G	T		nonIDM	24.3
S1_2667453	1	2667453	0	0.94	0.94	A	G	A	GlazPoly	24.3
S1_2671913	1	2671913	0	1	1	C	T	C	Strict	24.1
S1_2671918	1	2671918	0	0	0	G	A		nonIDM	24.1
S1_2671927	1	2671927	0	0	0	A	T		nonIDM	24.1
S1_2675440	1	2675440	0	0	0	A	G		nonIDM	24.3
S1_2675446	1	2675446	0.45	0	0.45	A	G		nonIDM	24.3
S1_2675464	1	2675464	0	0	0	G	A		nonIDM	24.3
S1_2700314	1	2700314	0.3	0	0.3	G	T		nonIDM	24.7
S1_2700329	1	2700329	0.25	0	0.25	G	A		nonIDM	24.7
S1_2700342	1	2700342	0.4	0	0.4	C	T		nonIDM	24.7
S1_2701316	1	2701316	0.4	0.62	0.22	T	G		nonIDM	24.7
S1_2701369	1	2701369	0.4	1	0.6	T	G		nonIDM	24.7
S1_2701379	1	2701379	0.4	1	0.6	T	A		nonIDM	24.7
S1_2701395	1	2701395	0.3	0	0.3	T	C		nonIDM	24.7
S1_2703220	1	2703220	0	0	0	A	G		nonIDM	24.7
S1_2703267	1	2703267	0	0	0	G	A		nonIDM	24.7
S1_2703277	1	2703277	0.3	1	0.7	G	A		nonIDM	24.7
S1_2703304	1	2703304	0.5	0	0.5	G	T		nonIDM	24.7
S1_2703309	1	2703309	0.35	1	0.65	T	C		nonIDM	24.7
S1_2705585	1	2705585	0	0	0	C	T		nonIDM	24.9
S1_2705979	1	2705979	0	0	0	T	C		nonIDM	24.9
S1_2706108	1	2706108	0	1	1	C	T	C	Strict	24.9
S1_2708095	1	2708095	0	0	0	T	C		nonIDM	24.9
S1_2708146	1	2708146	0	0	0	G	A		nonIDM	24.9
S1_2708183	1	2708183	0.25	0	0.25	G	C		nonIDM	24.9
S1_2708260	1	2708260	0.4	0	0.4	A	C		nonIDM	24.9
S1_2708294	1	2708294	0	0	0	C	T		nonIDM	24.9
S1_2730019	1	2730019	0.75	1	0.25	A	T		nonIDM	25.2
S1_2736323	1	2736323	0	0	0	T	C		nonIDM	25.5
S1_2736335	1	2736335	0	0.25	0.25	A	C	A	GlazPoly	25.5
S1_2748399	1	2748399	0	1	1	C	T	C	Strict	25.4
S1_2748418	1	2748418	0	1	1	G	C	G	Strict	25.4
S1_2748714	1	2748714	0	0.94	0.94	G	A	G	GlazPoly	25.4
S1_2752474	1	2752474	0.2	0	0.2	C	G		nonIDM	25.4
S1_2753239	1	2753239	0.25	0	0.25	G	A		nonIDM	25.4
S1_2753397	1	2753397	0	0	0	A	C		nonIDM	25.4
S1_2753403	1	2753403	0	0	0	C	G		nonIDM	25.4
S1_2753442	1	2753442	0.2	0	0.2	G	T		nonIDM	25.4
S1_2816664	1	2816664	0.05	0.06	0.01	C	A		nonIDM	25.4
S1_2983724	1	2983724	0.2	1	0.8	A	C		nonIDM	25.8
S1_2983765	1	2983765	0	0.56	0.56	T	C	T	GlazPoly	25.8
S1_2983773	1	2983773	0	0.44	0.44	A	C	A	GlazPoly	25.8
S1_2999570	1	2999570	0	0	0	C	T		nonIDM	25.8
S1_2999590	1	2999590	0	0.25	0.25	C	G	C	GlazPoly	25.8
S1_2999604	1	2999604	0	0	0	C	T		nonIDM	25.8
S1_2999615	1	2999615	0.05	0	0.05	T	C		nonIDM	25.8
S1_2999628	1	2999628	0.2	0	0.2	G	A		nonIDM	25.8
S1_2999635	1	2999635	0	0	0	A	G		nonIDM	25.8
S1_3026491	1	3026491	0.4	0	0.4	G	A		nonIDM	25.9
S1_3026501	1	3026501	0	0.12	0.12	C	T	C	GlazPoly	25.9
S1_3028563	1	3028563	0	0	0	T	G		nonIDM	25.9
S1_3028568	1	3028568	0.15	0	0.15	C	G		nonIDM	25.9
S1_3031032	1	3031032	0	0.38	0.38	G	C	G	GlazPoly	25.9
S1_3031041	1	3031041	0	0.38	0.38	G	A	G	GlazPoly	25.9
S1_3031141	1	3031141	0	0	0	G	A		nonIDM	25.9
S1_3031156	1	3031156	0	0.1	0.1	C	T	C	GlazPoly	25.9
S1_3031206	1	3031206	0.2	0	0.2	G	A		nonIDM	25.9
S1_3031211	1	3031211	0	0	0	C	T		nonIDM	25.9
S1_3037292	1	3037292	0	1	1	C	T	C	Strict	25.9
S1_3037303	1	3037303	0.2	0	0.2	T	G		nonIDM	25.9
S1_3037334	1	3037334	0	0	0	T	G		nonIDM	25.9
S1_3037340	1	3037340	0	1	1	A	T	A	Strict	25.9
S1_3037372	1	3037372	0	0.31	0.31	C	T	C	GlazPoly	25.9
S1_3037380	1	3037380	0	0.38	0.38	C	A	C	GlazPoly	25.9
S1_3037387	1	3037387	0	1	1	A	T	A	Strict	25.9
S1_3047789	1	3047789	0	0	0	G	T		nonIDM	26
S1_3047834	1	3047834	0	0.25	0.25	A	T	A	GlazPoly	26
S1_3047840	1	3047840	0	0	0	T	G		nonIDM	26
S1_3063589	1	3063589	0.3	0	0.3	C	G		nonIDM	26.4
S1_3071113	1	3071113	0.05	1	0.95	A	G		nonIDM	26.5
S1_3071134	1	3071134	0	0	0	C	T		nonIDM	26.4
S1_3071141	1	3071141	0.45	1	0.55	G	A		nonIDM	26.4
S1_3073360	1	3073360	0.15	0	0.15	C	T		nonIDM	25.8
S1_3073498	1	3073498	0.15	0	0.15	G	T		nonIDM	26.1
S1_3073708	1	3073708	0.3	0	0.3	A	G		nonIDM	25.8
S1_3073717	1	3073717	0.15	0	0.15	C	A		nonIDM	25.8
S1_3077765	1	3077765	0	0	0	T	C		nonIDM	26.1
S1_3077878	1	3077878	0	0.12	0.12	A	T	A	GlazPoly	26.1
S1_3084278	1	3084278	0	0.25	0.25	A	G	A	GlazPoly	26.2
S1_3084288	1	3084288	0.25	0	0.25	G	C		nonIDM	26.2
S1_3084297	1	3084297	0.05	0	0.05	C	T		nonIDM	26.2
S1_3084319	1	3084319	0.35	0.19	0.16	G	A		nonIDM	26.2
S1_3084568	1	3084568	0.45	0	0.45	T	A		nonIDM	26.2
S1_3084577	1	3084577	0.05	0.31	0.26	A	G		nonIDM	26.2
S1_3084731	1	3084731	0.4	0	0.4	A	G		nonIDM	26.2
S1_3084751	1	3084751	0.25	0	0.25	A	G		nonIDM	26.2
S1_3096066	1	3096066	0	0	0	G	C		nonIDM	26.5
S1_3096078	1	3096078	0.05	0	0.05	T	C		nonIDM	26.5
S1_3096087	1	3096087	0	0	0	T	C		nonIDM	26.5
S1_3096220	1	3096220	0	0.12	0.12	G	T	G	GlazPoly	26.6
S1_3096228	1	3096228	0	0.12	0.12	A	C	A	GlazPoly	26.6
S1_3096260	1	3096260	0	0	0	A	G		nonIDM	26.6
S1_3096420	1	3096420	0.1	0	0.1	C	A		nonIDM	26.6
S1_3096447	1	3096447	0	0	0	C	A		nonIDM	26.6
S1_3096459	1	3096459	0.8	0.19	0.61	T	C		nonIDM	26.6
S1_3096464	1	3096464	0	0	0	C	A		nonIDM	26.6
S1_3096530	1	3096530	0.15	0	0.15	G	A		nonIDM	26.6
S1_3096738	1	3096738	0.05	0	0.05	C	T		nonIDM	26.5
S1_3096747	1	3096747	0.3	0	0.3	C	T		nonIDM	26.5
S1_3096757	1	3096757	0.25	0	0.25	A	G		nonIDM	26.5
S1_3097718	1	3097718	0.15	0	0.15	T	C		nonIDM	26.5
S1_3131696	1	3131696	0.05	0	0.05	C	T		nonIDM	26.5
S1_3131701	1	3131701	0.05	0.06	0.01	T	C		nonIDM	26.5
S1_3134590	1	3134590	0.4	0.81	0.41	T	C		nonIDM	26.5
S1_3134599	1	3134599	0.2	0	0.2	A	T		nonIDM	26.5
S1_3186362	1	3186362	0	0.56	0.56	C	G	C	GlazPoly	26.6
S1_3192359	1	3192359	0.15	0	0.15	G	A		nonIDM	26.7
S1_3192396	1	3192396	0	0.19	0.19	A	T	A	GlazPoly	26.7
S1_3192411	1	3192411	0.2	1	0.8	A	G		nonIDM	26.7
S1_3208892	1	3208892	0.05	0	0.05	A	C		nonIDM	26.7
S1_3208907	1	3208907	0.05	0	0.05	C	T		nonIDM	26.7
S1_3208972	1	3208972	0	0.38	0.38	T	C	T	GlazPoly	26.7
S1_3208984	1	3208984	0.15	0	0.15	A	C		nonIDM	26.7
S1_3266972	1	3266972	0	0.38	0.38	T	C	T	GlazPoly	27.6
S1_3267030	1	3267030	0.15	0	0.15	T	A		nonIDM	27.6
S1_3267041	1	3267041	0.3	0	0.3	C	T		nonIDM	27.6
S1_3267059	1	3267059	0	0	0	T	A		nonIDM	27.6
S1_3267232	1	3267232	0	0	0	T	C		nonIDM	27.7
S1_3267855	1	3267855	0	1	1	A	T	A	Strict	27.7
S1_3274004	1	3274004	0.05	1	0.95	C	T		tagIDM	28
S1_3274079	1	3274079	0	0.5	0.5	C	G	C	GlazPoly	28
S1_3274544	1	3274544	0.3	0	0.3	A	T		nonIDM	27.7
S1_3274560	1	3274560	0.3	0	0.3	G	T		nonIDM	27.8
S1_3275217	1	3275217	0	0.62	0.62	G	T	G	GlazPoly	28
S1_3275226	1	3275226	0.3	0	0.3	A	G		nonIDM	28
S1_3276694	1	3276694	0	0.38	0.38	C	T	C	GlazPoly	27.1
S1_3410772	1	3410772	0.25	0	0.25	C	T		nonIDM	28.3
S1_3410782	1	3410782	0.05	0	0.05	T	C		nonIDM	28.3
S1_3410865	1	3410865	0	0	0	A	C		nonIDM	28.3
S1_3410890	1	3410890	0.05	0	0.05	G	A		nonIDM	28.3
S1_3416158	1	3416158	0	0	0	T	G		nonIDM	28.3
S1_3416164	1	3416164	0.15	0	0.15	G	A		nonIDM	28.3
S1_3416176	1	3416176	0	0.62	0.62	C	T	C	GlazPoly	28.3
S1_3416181	1	3416181	0.15	0	0.15	T	C		nonIDM	28.3
S1_3416198	1	3416198	0	0.12	0.12	C	T	C	GlazPoly	28.3
S1_3416218	1	3416218	0.15	1	0.85	C	T		nonIDM	28.3
S1_3416225	1	3416225	0.05	0.62	0.57	A	T		nonIDM	28.3
S1_3416405	1	3416405	0.15	0	0.15	G	A		nonIDM	28.3
S1_3425542	1	3425542	0	0.25	0.25	T	C	T	GlazPoly	28.4
S1_3425782	1	3425782	0.1	0	0.1	G	T		nonIDM	28.4
S1_3425802	1	3425802	0.35	1	0.65	G	A		nonIDM	28.4
S1_3425844	1	3425844	0	0.12	0.12	C	T	C	GlazPoly	28.4
S1_3425861	1	3425861	0	0.25	0.25	T	A	T	GlazPoly	28.4
S1_3425897	1	3425897	0.1	0	0.1	A	G		nonIDM	28.4
S1_3425997	1	3425997	0	0	0	A	G		nonIDM	28.4
S1_3432997	1	3432997	0.15	0	0.15	G	A		nonIDM	28.4
S1_3433013	1	3433013	0.7	1	0.3	T	G		nonIDM	28.4
S1_3433683	1	3433683	0	0.69	0.69	C	G	C	GlazPoly	28.4
S1_3433688	1	3433688	0.05	0	0.05	G	A		nonIDM	28.4
S1_3433762	1	3433762	0.05	1	0.95	G	A		tagIDM	28.4
S1_3433774	1	3433774	0.05	1	0.95	A	T		tagIDM	28.4
S1_3433833	1	3433833	0	1	1	G	A	G	Strict	28.4
S1_3433851	1	3433851	0	1	1	T	C	T	Strict	28.4
S1_3443621	1	3443621	0	0.06	0.06	T	G	T	GlazPoly	28.5
S1_3443854	1	3443854	0	0	0	G	A		nonIDM	28.5
S1_3443860	1	3443860	0.25	0	0.25	T	C		nonIDM	28.5
S1_3443879	1	3443879	0	0.19	0.19	G	T	G	GlazPoly	28.5
S1_3443892	1	3443892	0	0	0	A	T		nonIDM	28.5
S1_3443930	1	3443930	0	0	0	A	G		nonIDM	28.5
S1_3443952	1	3443952	0.6	1	0.4	G	A		nonIDM	28.5
S1_3443984	1	3443984	0.5	0	0.5	T	C		nonIDM	28.5
S1_3444014	1	3444014	0.55	0	0.55	A	G		nonIDM	28.5
S1_3455734	1	3455734	0.55	1	0.45	T	C		nonIDM	28.5
S1_3455769	1	3455769	0	1	1	A	T	A	Strict	28.5
S1_3458996	1	3458996	0.55	0	0.55	G	A		nonIDM	28.5
S1_3463185	1	3463185	0.6	0	0.6	G	A		nonIDM	28.6
S1_3463212	1	3463212	0	0	0	T	C		nonIDM	28.6
S1_3463451	1	3463451	0.55	1	0.45	T	G		nonIDM	28.6
S1_3463468	1	3463468	0.55	1	0.45	A	C		nonIDM	28.6
S1_3463475	1	3463475	0	0	0	G	A		nonIDM	28.6
S1_3463565	1	3463565	0	0	0	G	T		nonIDM	28.6
S1_3463779	1	3463779	0.55	1	0.45	T	C		nonIDM	28.6
S1_3463838	1	3463838	0	0	0	C	T		nonIDM	28.6
S1_3463927	1	3463927	0.55	1	0.45	A	G		nonIDM	28.6
S1_3464033	1	3464033	0	0	0	G	T		nonIDM	28.6
S1_3465753	1	3465753	0.45	1	0.55	G	A		nonIDM	28.6
S1_3465794	1	3465794	0	0	0	A	G		nonIDM	28.6
S1_3467989	1	3467989	0	1	1	G	A	G	Strict	28.6
S1_3468154	1	3468154	0	0.12	0.12	G	C	G	GlazPoly	28.6
S1_3468162	1	3468162	0	0.25	0.25	A	G	A	GlazPoly	28.6
S1_3468183	1	3468183	0	0	0	T	A		nonIDM	28.6
S1_3468196	1	3468196	0.35	0	0.35	T	A		nonIDM	28.6
S1_3468223	1	3468223	0	1	1	T	A	T	Strict	28.6
S1_3468231	1	3468231	0.35	0	0.35	G	A		nonIDM	28.6
S1_3469226	1	3469226	0.55	1	0.45	T	C		nonIDM	28.6
S1_3478442	1	3478442	0	0	0	T	C		nonIDM	28.6
S1_3478556	1	3478556	0.1	0	0.1	A	G		nonIDM	28.6
S1_3478571	1	3478571	0	0.94	0.94	G	A	G	GlazPoly	28.6
S1_3478629	1	3478629	0.35	1	0.65	G	A		nonIDM	28.6
S1_3478848	1	3478848	0.35	0	0.35	A	T		nonIDM	28.6
S1_3478854	1	3478854	0	0	0	G	A		nonIDM	28.6
S1_3485833	1	3485833	0	0	0	A	C		nonIDM	28.5
S1_3485932	1	3485932	0	0.56	0.56	T	G	T	GlazPoly	28.5
S1_3485938	1	3485938	0.1	0.25	0.15	G	A		nonIDM	28.5
S1_3485963	1	3485963	0	0	0	C	T		nonIDM	28.5
S1_3486022	1	3486022	0.45	0	0.45	G	A		nonIDM	28.5
S1_3490064	1	3490064	0	0	0	C	T		nonIDM	28.4
S1_3490074	1	3490074	0.2	0	0.2	C	T		nonIDM	28.4
S1_3490082	1	3490082	0	0	0	T	C		nonIDM	28.4
S1_3490089	1	3490089	0.55	0	0.55	T	G		nonIDM	28.4
S1_3492323	1	3492323	0.05	0	0.05	G	A		nonIDM	28.4
S1_3492350	1	3492350	0.05	0	0.05	T	G		nonIDM	28.4
S1_3502157	1	3502157	0.9	0	0.9	A	T		nonIDM	28.4
S1_3502190	1	3502190	0	1	1	G	A	G	Strict	28.4
S1_3502281	1	3502281	0.05	0	0.05	C	T		nonIDM	28.4
S1_3503203	1	3503203	0.05	1	0.95	G	A		tagIDM	28.4
S1_3503267	1	3503267	0	1	1	T	G	T	Strict	28.4
S1_3503300	1	3503300	0.05	0	0.05	A	T		nonIDM	28.4
S1_3503337	1	3503337	0	0	0	T	G		nonIDM	28.2
S1_3503824	1	3503824	0	0.56	0.56	G	T	G	GlazPoly	28.2
S1_3532500	1	3532500	0.95	1	0.05	G	T		nonIDM	28.4
S1_3532526	1	3532526	0.95	0.38	0.57	G	C		nonIDM	28.4
S1_3532535	1	3532535	0	0.88	0.88	A	T	A	GlazPoly	28.4
S1_3532570	1	3532570	0.45	0	0.45	G	C		nonIDM	28.4
S1_3532578	1	3532578	0.5	0	0.5	T	C		nonIDM	28.4
S1_3532776	1	3532776	0.2	0	0.2	G	T		nonIDM	28.4
S1_3542272	1	3542272	0	0.38	0.38	C	A	C	GlazPoly	28.5
S1_3551696	1	3551696	0	0.75	0.75	C	G	C	GlazPoly	28.5
S1_3551737	1	3551737	0	0	0	T	C		nonIDM	28.5
S1_3554587	1	3554587	0.05	0	0.05	G	A		nonIDM	28.6
S1_3555409	1	3555409	0.3	0	0.3	C	T		nonIDM	28.6
S1_3555442	1	3555442	0	1	1	A	T	A	Strict	28.6
S1_3555466	1	3555466	0	0.31	0.31	G	A	G	GlazPoly	28.6
S1_3555580	1	3555580	0	0.75	0.75	C	T	C	GlazPoly	28.6
S1_3556174	1	3556174	0.3	0	0.3	A	G		nonIDM	28.6
S1_3556207	1	3556207	0.05	0	0.05	A	T		nonIDM	28.6
S1_3556424	1	3556424	0.45	0	0.45	C	T		nonIDM	28.6
S1_3556445	1	3556445	0	0.75	0.75	G	A	G	GlazPoly	28.6
S1_3556511	1	3556511	0.05	0	0.05	G	A		nonIDM	28.6
S1_3556549	1	3556549	0.35	0	0.35	C	T		nonIDM	28.6
S1_3556554	1	3556554	0	1	1	A	G	A	Strict	28.6
S1_3585162	1	3585162	0.3	0	0.3	G	T		nonIDM	28.6
S1_3593193	1	3593193	0	0	0	A	T		nonIDM	28.7
S1_3593214	1	3593214	0			G	A		nonIDM	28.7
S1_3593229	1	3593229	0	0	0	A	C		nonIDM	28.7
S1_3593280	1	3593280	0	0.38	0.38	A	G	A	GlazPoly	28.7
S1_3593302	1	3593302	0	1	1	G	A	G	Strict	28.7
S1_3600041	1	3600041	0.05	0	0.05	A	C		nonIDM	28.7
S1_3604364	1	3604364	0.25	0	0.25	C	A		nonIDM	28.8
S1_3604382	1	3604382	0	0.38	0.38	A	C	A	GlazPoly	28.8
S1_3604389	1	3604389	0.25	0	0.25	C	T		nonIDM	28.8
S1_3604394	1	3604394	0.15	0	0.15	T	C		nonIDM	28.8
S1_3613120	1	3613120	0	0.69	0.69	T	C	T	GlazPoly	29.1
S1_3616117	1	3616117	0.5	1	0.5	A	G		nonIDM	28.7
S1_3616576	1	3616576	0	0	0	G	A		nonIDM	28.7
S1_3616628	1	3616628	0.05	0	0.05	G	T		nonIDM	28.7
S1_3623534	1	3623534	0.1	0	0.1	C	A		nonIDM	28.8
S1_3623539	1	3623539	0.1	1	0.9	A	G		nonIDM	28.9
S1_3623582	1	3623582	0.1	1	0.9	G	C		nonIDM	28.7
S1_3625444	1	3625444	0	0	0	T	A		nonIDM	28.8
S1_3625590	1	3625590	0	0	0	A	C		nonIDM	28.8
S1_3625612	1	3625612	0	0	0	G	C		nonIDM	28.8
S1_3625741	1	3625741	0	0	0	T	A		nonIDM	28.8
S1_3625755	1	3625755	0.6	0.06	0.54	C	T		nonIDM	28.8
S1_3625785	1	3625785	0.6	0.06	0.54	C	T		nonIDM	28.8
S1_3638240	1	3638240	0.05	0	0.05	T	C		nonIDM	29
S1_3638279	1	3638279	0.05	0.31	0.26	A	G		nonIDM	29
S1_3638307	1	3638307	0.1	0	0.1	C	T		nonIDM	29
S1_3638327	1	3638327	0.05	0	0.05	T	C		nonIDM	29
S1_3638361	1	3638361	0.15	0	0.15	G	C		nonIDM	29
S1_3648760	1	3648760	0	0	0	G	A		nonIDM	29.6
S1_3648939	1	3648939	0	1	1	G	A	G	Strict	29.6
S1_3648962	1	3648962	0	0	0	A	G		nonIDM	29.6
S1_3649025	1	3649025	0.2	0	0.2	A	G		nonIDM	29.7
S1_3657040	1	3657040	0.15	0	0.15	G	C		nonIDM	29.7
S1_3657065	1	3657065	0	0	0	G	T		nonIDM	29.7
S1_3666589	1	3666589	0	0.31	0.31	C	G	C	GlazPoly	29.6
S1_3666675	1	3666675	0.1	0	0.1	A	T		nonIDM	29.6
S1_3666932	1	3666932	0	0.69	0.69	A	T	A	GlazPoly	29.6
S1_3666939	1	3666939	0	1	1	G	A	G	Strict	29.6
S1_3666953	1	3666953	0	0.69	0.69	A	C	A	GlazPoly	29.6
S1_3667179	1	3667179	0.05	1	0.95	C	T		nonIDM	29.6
S1_3667743	1	3667743	0.05	1	0.95	T	C		nonIDM	29.6
S1_3668498	1	3668498	0.05	0	0.05	C	A		nonIDM	29.5
S1_3668517	1	3668517	0	0	0	T	A		nonIDM	29.5
S1_3670397	1	3670397	0	0.69	0.69	G	A	G	GlazPoly	29.6
S1_3670409	1	3670409	0.05	0.94	0.89	T	C		nonIDM	29.6
S1_3670424	1	3670424	0	0.81	0.81	G	C	G	GlazPoly	29.6
S1_3670448	1	3670448	0	0	0	A	G		nonIDM	29.6
S1_3670558	1	3670558	0.1	0	0.1	G	A		nonIDM	29.6
S1_3670581	1	3670581	0.5	0	0.5	G	T		nonIDM	29.6
S1_3670733	1	3670733	0	0	0	T	C		nonIDM	29.6
S1_3670750	1	3670750	0.4	0	0.4	T	G		nonIDM	29.6
S1_3676775	1	3676775	0.2	0	0.2	G	A		nonIDM	29.7
S1_3676781	1	3676781	0.05	0	0.05	T	C		nonIDM	29.7
S1_3679133	1	3679133	0	0	0	T	G		nonIDM	29.7
S1_3679142	1	3679142	0	0	0	G	C		nonIDM	29.7
S1_3679164	1	3679164	0	0.12	0.12	T	C	T	GlazPoly	29.7
S1_3679176	1	3679176	0	1	1	C	T	C	Strict	29.7
S1_3704298	1	3704298	0	0.25	0.25	G	C	G	GlazPoly	29.9
S1_3706113	1	3706113	0	0	0	T	C		nonIDM	29.9
S1_3706122	1	3706122	0	0.25	0.25	A	G	A	GlazPoly	29.9
S1_3706133	1	3706133	0	1	1	A	G	A	Strict	29.9
S1_3710230	1	3710230	0	0	0	G	T		nonIDM	30
S1_3710360	1	3710360	0.05	1	0.95	G	A		nonIDM	30
S1_3710400	1	3710400	0	1	1	T	G	T	Strict	30
S1_3710411	1	3710411	0	1	1	T	A	T	Strict	30
S1_3710422	1	3710422	0	0.94	0.94	C	T	C	GlazPoly	30
S1_3710644	1	3710644	0	1	1	C	T	C	Strict	30
S1_3710666	1	3710666	0.05	0	0.05	G	C		nonIDM	30
S1_3710684	1	3710684	0.6			C	T		nonIDM	30
S1_3715232	1	3715232	0	0	0	A	C		nonIDM	30
S1_3716356	1	3716356	0.1	0	0.1	T	C		nonIDM	30
S1_3716599	1	3716599	0	0	0	G	A		nonIDM	30
S1_3716616	1	3716616	0	0.88	0.88	A	C	A	GlazPoly	30
S1_3720062	1	3720062	0	0.31	0.31	C	T	C	GlazPoly	30
S1_3720092	1	3720092	0	0	0	A	C		nonIDM	30
S1_3720099	1	3720099	0	0.31	0.31	G	C	G	GlazPoly	30
S1_3720342	1	3720342	0	0.62	0.62	A	G	A	GlazPoly	30
S1_3720359	1	3720359	0	1	1	C	A	C	Strict	30
S1_3720386	1	3720386	0.1	0	0.1	C	T		nonIDM	30
S1_3720392	1	3720392	0	0.12	0.12	T	C	T	GlazPoly	30
S1_3720432	1	3720432	0.1	0	0.1	T	C		nonIDM	30
S1_3736128	1	3736128	0	1	1	G	T	G	Strict	30
S1_3754766	1	3754766	0.35	0.19	0.16	T	C		nonIDM	30.2
S1_3754800	1	3754800	0	0.62	0.62	T	A	T	GlazPoly	30.2
S1_3754817	1	3754817	0	0.19	0.19	T	A	T	GlazPoly	30.2
S1_3754964	1	3754964	0.25	0	0.25	A	T		nonIDM	30.2
S1_3763612	1	3763612	0.6	1	0.4	T	C		nonIDM	30.4
S1_3781436	1	3781436	0	0	0	C	T		nonIDM	29.4
S1_3781504	1	3781504	0.05	0	0.05	A	T		nonIDM	29.4
S1_3783953	1	3783953	0	0	0	A	G		nonIDM	29.5
S1_3783965	1	3783965	0.1	0	0.1	G	T		nonIDM	29.5
S1_3783978	1	3783978	0	0.38	0.38	G	A	G	GlazPoly	29.5
S1_3784391	1	3784391	0.55	0	0.55	A	T		nonIDM	29.5
S1_3784516	1	3784516	0	0	0	G	A		nonIDM	29.5
S1_3785919	1	3785919	0	0	0	G	A		nonIDM	29.5
S1_3859351	1	3859351	0	0.75	0.75	G	A	G	GlazPoly	31.3
S1_3859356	1	3859356	0	1	1	T	C	T	Strict	31.3
S1_3859382	1	3859382	0.4	0	0.4	A	G		nonIDM	31.3
S1_3859440	1	3859440	0.15	0	0.15	T	A		nonIDM	31.3
S1_3859446	1	3859446	0	0.75	0.75	T	G	T	GlazPoly	31.3
S1_3859470	1	3859470	0.1	0	0.1	G	C		nonIDM	31.3
S1_3859506	1	3859506	0.1	0	0.1	C	A		nonIDM	31.3
S1_3859515	1	3859515	0.1	0	0.1	G	A		nonIDM	31.3
S1_3866988	1	3866988	0.2	1	0.8	G	A		nonIDM	31.4
S1_3867035	1	3867035	0	1	1	G	A	G	Strict	31.4
S1_3867047	1	3867047	0	1	1	T	C	T	Strict	31.4
S1_3867053	1	3867053	0	0.56	0.56	C	T	C	GlazPoly	31.4
S1_3867064	1	3867064	0.2	0	0.2	T	G		nonIDM	31.4
S1_3867075	1	3867075	0.35	0	0.35	T	G		nonIDM	31.4
S1_3867093	1	3867093	0	0	0	G	C		nonIDM	31.4
S1_3867099	1	3867099	0	1	1	T	C	T	Strict	31.4
S1_3867276	1	3867276	0.25	0	0.25	A	C		nonIDM	31.4
S1_3874868	1	3874868	0.85	0	0.85	T	A		nonIDM	31.3
S1_3874894	1	3874894	0.1	0	0.1	A	T		nonIDM	31.4
S1_3878444	1	3878444	0	0	0	T	C		nonIDM	31.5
S1_3878450	1	3878450	0	1	1	C	G	C	Strict	31.5
S1_3885967	1	3885967	0.05	0	0.05	G	C		nonIDM	31.5
S1_3885999	1	3885999	0.05	0.06	0.01	G	A		nonIDM	31.5
S1_3886010	1	3886010	0.05	0.5	0.45	T	C		nonIDM	31.5
S1_3895137	1	3895137	0	0.12	0.12	G	C	G	GlazPoly	31.6
S1_3997280	1	3997280	0.15	0	0.15	T	C		nonIDM	32.7
S1_3997316	1	3997316	0.15	0	0.15	T	C		nonIDM	32.7
S1_3997330	1	3997330	0.1	0	0.1	A	G		nonIDM	32.7
S1_3997443	1	3997443	0.1	0	0.1	G	T		nonIDM	32.7
S1_4006138	1	4006138	0.05	0	0.05	C	G		nonIDM	32.7
S1_4006147	1	4006147	0.7	0	0.7	T	C		nonIDM	32.7
S1_4007905	1	4007905	0	0.69	0.69	G	A	G	GlazPoly	32.7
S1_4007919	1	4007919	0	0	0	C	T		nonIDM	32.7
S1_4007925	1	4007925	0	1	1	A	C	A	Strict	32.7
S1_4007935	1	4007935	0	0.62	0.62	G	A	G	GlazPoly	32.7
S1_4007943	1	4007943	0.2	1	0.8	A	G		nonIDM	32.7
S1_4007979	1	4007979	0	0.62	0.62	G	A	G	GlazPoly	32.7
S1_4009368	1	4009368	0.25	0.06	0.19	G	C		nonIDM	32.7
S1_4009449	1	4009449	0	0	0	C	A		nonIDM	32.7
S1_4009456	1	4009456	0	0	0	G	A		nonIDM	32.7
S1_4010046	1	4010046	0.05	0	0.05	A	C		nonIDM	32.8
S1_4010057	1	4010057	0.05	1	0.95	A	G		nonIDM	32.8
S1_4010073	1	4010073	0.1	1	0.9	A	C		nonIDM	32.8
S1_4010204	1	4010204	0	1	1	T	A	T	Strict	32.8
S1_4010210	1	4010210	0.6	0	0.6	C	G		nonIDM	32.8
S1_4010253	1	4010253	0	0.44	0.44	T	G	T	GlazPoly	32.8
S1_4017450	1	4017450	0	0	0	T	G		nonIDM	32.7
S1_4017490	1	4017490	0.05	0	0.05	A	C		nonIDM	32.7
S1_4018519	1	4018519	0	0	0	A	C		nonIDM	32.8
S1_4018540	1	4018540	0	0	0	T	A		nonIDM	32.8
S1_4019939	1	4019939	0	0.25	0.25	A	C	A	GlazPoly	32.8
S1_4019969	1	4019969	0	0.25	0.25	C	T	C	GlazPoly	32.8
S1_4020079	1	4020079	0.7	0	0.7	G	A		nonIDM	32.8
S1_4023158	1	4023158	0.05	0	0.05	C	T		nonIDM	32.9
S1_4023171	1	4023171	0	0	0	A	G		nonIDM	32.9
S1_4023177	1	4023177	0.05	0	0.05	A	G		nonIDM	32.9
S1_4023191	1	4023191	0.15	1	0.85	A	G		nonIDM	32.9
S1_4037744	1	4037744	0.3	1	0.7	G	A		nonIDM	33.1
S1_4037783	1	4037783	0	0.06	0.06	T	C	T	GlazPoly	33.1
S1_4048202	1	4048202	0.1	1	0.9	A	G		nonIDM	33.1
S1_4048292	1	4048292	0.05	0	0.05	T	C		nonIDM	33
S1_4048299	1	4048299	0.1	1	0.9	C	A		nonIDM	33
S1_4048312	1	4048312	0.05	0	0.05	T	C		nonIDM	33
S1_4048350	1	4048350	0.35	0	0.35	A	T		nonIDM	33
S1_4048366	1	4048366	0	0.29	0.29	A	T	A	GlazPoly	33
S1_4048380	1	4048380	0	0.94	0.94	T	C	T	GlazPoly	33
S1_4048387	1	4048387	0	0	0	G	T		nonIDM	33
S1_4048395	1	4048395	0	0.12	0.12	A	T	A	GlazPoly	33
S1_4072062	1	4072062	0.25	1	0.75	C	G		nonIDM	33.3
S1_4072102	1	4072102	0	0	0	A	T		nonIDM	33.2
S1_4092407	1	4092407	0	1	1	A	G	A	Strict	33.8
S1_4094603	1	4094603	0	1	1	A	G	A	Strict	33.8
S1_4094612	1	4094612	0.1	0	0.1	C	T		nonIDM	33.8
S1_4098667	1	4098667	0	1	1	T	C	T	Strict	33.8
S1_4098674	1	4098674	0.5	0	0.5	C	G		nonIDM	33.8
S1_4098850	1	4098850	0.15	0	0.15	T	G		nonIDM	33.9
S1_4098928	1	4098928	0.45	0	0.45	T	C		nonIDM	33.9
S1_4098944	1	4098944	0	0.38	0.38	G	A	G	GlazPoly	33.9
S1_4098956	1	4098956	0	0.25	0.25	G	A	G	GlazPoly	33.9
S1_4098967	1	4098967	0.4	1	0.6	T	G		nonIDM	33.9
S1_4098973	1	4098973	0.3	0	0.3	C	T		nonIDM	33.9
S1_4099009	1	4099009	0.4	1	0.6	A	G		nonIDM	33.9
S1_4099014	1	4099014	0	0	0	A	T		nonIDM	33.9
S1_4113626	1	4113626	0	0	0	T	C		nonIDM	34
S1_4113632	1	4113632	0	1	1	T	A	T	Strict	34
S1_4113858	1	4113858	0	0.25	0.25	A	T	A	GlazPoly	34
S1_4140125	1	4140125	0	1	1	C	G	C	Strict	34.1
S1_4140131	1	4140131	0.55	1	0.45	G	C		nonIDM	34.1
S1_4141369	1	4141369	0	0.56	0.56	A	G	A	GlazPoly	34.1
S1_4141403	1	4141403	0	0	0	T	C		nonIDM	34.1
S1_4141411	1	4141411	0	0.12	0.12	G	A	G	GlazPoly	34.1
S1_4141418	1	4141418	0	0	0	G	T		nonIDM	34.1
S1_4141459	1	4141459	0	1	1	G	A	G	Strict	34.1
S1_4141472	1	4141472	0	0.06	0.06	A	G	A	GlazPoly	34.1
S1_4141506	1	4141506	0.2	0	0.2	G	T		nonIDM	34.1
S1_4141541	1	4141541	0.2	0	0.2	A	C		nonIDM	34.1
S1_4141598	1	4141598	0	0	0	C	G		nonIDM	34.1
S1_4141739	1	4141739	0	0	0	G	A		nonIDM	34.1
S1_4141760	1	4141760	0	0	0	A	G		nonIDM	34.1
S1_4148837	1	4148837	0.25	0.06	0.19	A	G		nonIDM	34.1
S1_4153597	1	4153597	0	1	1	A	C	A	Strict	34.1
S1_4153702	1	4153702	0	0.25	0.25	T	A	T	GlazPoly	34.1
S1_4153715	1	4153715	0.15	0	0.15	T	C		nonIDM	34.2
S1_4153757	1	4153757	0	1	1	G	A	G	Strict	34.2
S1_4153782	1	4153782	0	1	1	G	A	G	Strict	34.2
S1_4153793	1	4153793	0	0.81	0.81	G	C	G	GlazPoly	34.2
S1_4153810	1	4153810	0	0.12	0.12	T	C	T	GlazPoly	34.2
S1_4153875	1	4153875	0	0.06	0.06	A	T	A	GlazPoly	34.2
S1_4153922	1	4153922	0	0.38	0.38	G	A	G	GlazPoly	34.2
S1_4154066	1	4154066	0.2	0	0.2	A	C		nonIDM	34.1
S1_4265507	1	4265507	0	0	0	A	C		nonIDM	35.2
S1_4265515	1	4265515	0.15	0	0.15	C	A		nonIDM	35.2
S1_4265533	1	4265533	0.3	1	0.7	G	A		nonIDM	35.2
S1_4265700	1	4265700	0	0.19	0.19	T	A	T	GlazPoly	35.2
S1_4265802	1	4265802	0.25	1	0.75	A	G		nonIDM	35.2
S1_4270204	1	4270204	0	0	0	T	C		nonIDM	35.3
S1_4270230	1	4270230	0.3	1	0.7	G	T		nonIDM	35.3
S1_4270241	1	4270241	0	0	0	A	G		nonIDM	35.3
S1_4270652	1	4270652	0.25	0.38	0.12	C	T		nonIDM	35.3
S1_4270664	1	4270664	0.05	0	0.05	T	C		nonIDM	35.3
S1_4270770	1	4270770	0	0	0	G	A		nonIDM	35.3
S1_4271825	1	4271825	0.1	0	0.1	G	A		nonIDM	35.3
S1_4271830	1	4271830	0.25	0	0.25	C	T		nonIDM	35.3
S1_4271864	1	4271864	0	0	0	G	A		nonIDM	35.3
S1_4271877	1	4271877	0.05	0	0.05	T	C		nonIDM	35.3
S1_4271887	1	4271887	0.25	0	0.25	A	G		nonIDM	35.3
S1_4271903	1	4271903	0.35	1	0.65	A	G		nonIDM	35.3
S1_4271911	1	4271911	0.25	0	0.25	A	T		nonIDM	35.3
S1_4271927	1	4271927	0.25	1	0.75	A	G		nonIDM	35.3
S1_4271963	1	4271963	0.2	0	0.2	A	C		nonIDM	35.3
S1_4286608	1	4286608	0.1	1	0.9	T	G		nonIDM	35.5
S1_4353270	1	4353270	0.05	0	0.05	G	T		nonIDM	36.1
S1_4357055	1	4357055	0.25	0	0.25	G	A		nonIDM	35.6
S1_4357068	1	4357068	0	0.19	0.19	G	A	G	GlazPoly	35.6
S1_4357086	1	4357086	0.1	0	0.1	G	A		nonIDM	35.7
S1_4357094	1	4357094	0.3	0.19	0.11	G	A		nonIDM	35.7
S1_4357115	1	4357115	0	0	0	G	A		nonIDM	35.7
S1_4357199	1	4357199	0.1	0	0.1	T	C		nonIDM	35.7
S1_4357325	1	4357325	0.05	0	0.05	C	T		nonIDM	36
S1_4357492	1	4357492	0	1	1	T	A	T	Strict	35.5
S1_4357513	1	4357513	0	1	1	T	A	T	Strict	35.5
S1_4365599	1	4365599	0.6	0	0.6	G	T		nonIDM	35.4
S1_4365880	1	4365880	0.4	0	0.4	C	T		nonIDM	35.4
S1_4365947	1	4365947	0.05	0	0.05	C	T		nonIDM	35.4
S1_4369804	1	4369804	0.05	0	0.05	G	T		nonIDM	35.4
S1_4369840	1	4369840	0.05	1	0.95	G	A		nonIDM	35.4
S1_4371286	1	4371286	0.05	0	0.05	T	C		nonIDM	35.4
S1_4371403	1	4371403	0.05	0	0.05	G	A		nonIDM	35.4
S1_4371808	1	4371808	0	0.38	0.38	T	G	T	GlazPoly	35.4
S1_4371849	1	4371849	0	1	1	T	A	T	Strict	35.4
S1_4371873	1	4371873	0	0	0	C	A		nonIDM	35.4
S1_4371886	1	4371886	0	0	0	C	T		nonIDM	35.4
S1_4371949	1	4371949	0	1	1	T	C	T	Strict	35.4
S1_4375964	1	4375964	0.05	1	0.95	T	A		nonIDM	35.4
S1_4375969	1	4375969	0.15	0	0.15	A	C		nonIDM	35.4
S1_4376099	1	4376099	0	0.56	0.56	C	T	C	GlazPoly	35.4
S1_4376144	1	4376144	0.05	0	0.05	G	C		nonIDM	35.4
S1_4376201	1	4376201	0.05	0	0.05	T	C		nonIDM	35.4
S1_4376380	1	4376380	0.3	0	0.3	G	T		nonIDM	35.4
S1_4376914	1	4376914	0	0.64	0.64	T	A	T	GlazPoly	35.4
S1_4382541	1	4382541	0.35	0	0.35	C	A		nonIDM	35.6
S1_4382596	1	4382596	0.5	0	0.5	T	C		nonIDM	35.6
S1_4384341	1	4384341	0	0.38	0.38	A	T	A	GlazPoly	35.7
S1_4384348	1	4384348	0	0.38	0.38	A	G	A	GlazPoly	35.8
S1_4384395	1	4384395	0	0.06	0.06	A	C	A	GlazPoly	35.8
S1_4384471	1	4384471	0	0.94	0.94	C	G	C	GlazPoly	35.8
S1_4384480	1	4384480	0.4	0	0.4	G	A		nonIDM	35.8
S1_4392189	1	4392189	0.4	0.62	0.22	C	T		nonIDM	36.1
S1_4392194	1	4392194	0.4	0	0.4	A	G		nonIDM	36.1
S1_4392221	1	4392221	0.4	0.19	0.21	A	G		nonIDM	36.1
S1_4395519	1	4395519	0	0.19	0.19	T	G	T	GlazPoly	36.1
S1_4395531	1	4395531	0.55	1	0.45	T	C		nonIDM	36.1
S1_4398916	1	4398916	0	0	0	A	T		nonIDM	36.2
S1_4399181	1	4399181	0	0.31	0.31	C	A	C	GlazPoly	36.2
S1_4399257	1	4399257	0.35	1	0.65	A	T		nonIDM	36.2
S1_4399308	1	4399308	0.1	0	0.1	A	C		nonIDM	36.2
S1_4399347	1	4399347	0.05	0	0.05	C	T		nonIDM	36.2
S1_4399376	1	4399376	0	0	0	T	C		nonIDM	36.2
S1_4399382	1	4399382	0	0	0	C	T		nonIDM	36.2
S1_4399414	1	4399414	0	0.38	0.38	G	A	G	GlazPoly	36.2
S1_4399427	1	4399427	0.35	0.81	0.46	G	C		nonIDM	36.2
S1_4400963	1	4400963	0.05	0	0.05	A	T		nonIDM	36.2
S1_4401209	1	4401209	0.3	1	0.7	T	A		nonIDM	36.2
S1_4401230	1	4401230	0.2	0	0.2	T	G		nonIDM	36.2
S1_4401249	1	4401249	0.1	0	0.1	A	G		nonIDM	36.2
S1_4402202	1	4402202	0.5	1	0.5	A	G		nonIDM	36.2
S1_4412679	1	4412679	0.15	0	0.15	C	T		nonIDM	36.1
S1_4423877	1	4423877	0.1	0	0.1	T	C		nonIDM	36.1
S1_4423911	1	4423911	0	0.94	0.94	A	G	A	GlazPoly	36.1
S1_4424067	1	4424067	0	1	1	T	C	T	Strict	36.1
S1_4424097	1	4424097	0	0.75	0.75	T	C	T	GlazPoly	36.1
S1_4424326	1	4424326	0	1	1	A	G	A	Strict	36.2
S1_4424354	1	4424354	0	0.31	0.31	G	A	G	GlazPoly	36.2
S1_4424565	1	4424565	0	1	1	T	C	T	Strict	36.2
S1_4424610	1	4424610	0	0.31	0.31	G	A	G	GlazPoly	36.2
S1_4424658	1	4424658	0	1	1	A	G	A	Strict	36.2
S1_4424695	1	4424695	0	0	0	C	A		nonIDM	36.2
S1_4424963	1	4424963	0	0	0	A	T		nonIDM	36.2
S1_4426072	1	4426072	0	0	0	A	G		nonIDM	36.2
S1_4426227	1	4426227	0	0	0	G	A		nonIDM	36.2
S1_4426453	1	4426453	0	0	0	T	C		nonIDM	36.2
S1_4429990	1	4429990	0.05	0	0.05	C	A		nonIDM	36.3
S1_4430000	1	4430000	0.25	0	0.25	T	C		nonIDM	36.3
S1_4430018	1	4430018	0.6	1	0.4	C	T		nonIDM	36.3
S1_4437649	1	4437649	0	0	0	A	G		nonIDM	36.5
S1_4437730	1	4437730	0	1	1	G	A	G	Strict	36.5
S1_4438598	1	4438598	0	0	0	T	C		nonIDM	36.5
S1_4438604	1	4438604	0.05	0	0.05	T	A		nonIDM	36.5
S1_4442142	1	4442142	0	0	0	C	T		nonIDM	36.5
S1_4442189	1	4442189	0	0.38	0.38	C	A	C	GlazPoly	36.5
S1_4442275	1	4442275	0.55	0.88	0.32	C	A		nonIDM	36.5
S1_4442288	1	4442288	0	0.86	0.86	C	T	C	GlazPoly	36.5
S1_4442377	1	4442377	0	1	1	C	T	C	Strict	36.5
S1_4442668	1	4442668	0.3	1	0.7	C	T		nonIDM	36.7
S1_4442680	1	4442680	0	0	0	G	A		nonIDM	36.7
S1_4442714	1	4442714	0	0	0	A	G		nonIDM	36.5
S1_4443631	1	4443631	0.2	0	0.2	T	C		nonIDM	36.4
S1_4458519	1	4458519	0.05	0.12	0.08	T	G		nonIDM	36.7
S1_4458543	1	4458543	0.5	1	0.5	C	A		nonIDM	36.7
S1_4458566	1	4458566	0	0.19	0.19	C	G	C	GlazPoly	36.7
S1_4458610	1	4458610	0.25	0	0.25	C	T		nonIDM	36.7
S1_4458618	1	4458618	0.25	0	0.25	A	G		nonIDM	36.7
S1_4458628	1	4458628	0.5	1	0.5	A	C		nonIDM	36.7
S1_4458637	1	4458637	0.45	0	0.45	C	A		nonIDM	36.7
S1_4458642	1	4458642	0	0	0	A	C		nonIDM	36.7
S1_4474776	1	4474776	0	0	0	A	T		tagIDM	37.1
S1_4474804	1	4474804	0	0.38	0.38	C	T	C	GlazPoly	37.1
S1_4474836	1	4474836	0	0.38	0.38	A	C	A	GlazPoly	37.1
S1_4474857	1	4474857	0	0.38	0.38	T	G	T	GlazPoly	37.1
S1_4496313	1	4496313	0	0.62	0.62	G	C	G	GlazPoly	37.6
S1_4496380	1	4496380	0.05	0	0.05	C	A		nonIDM	37.6
S1_4496435	1	4496435	0.4	0	0.4	G	A		nonIDM	37.6
S1_4511809	1	4511809	0.05	0.88	0.82	C	T		nonIDM	37.7
S1_4511841	1	4511841	0.55	1	0.45	C	T		nonIDM	37.7
S1_4531522	1	4531522	0.75	0.62	0.12	T	C		nonIDM	37.7
S1_4533546	1	4533546	0.05	0	0.05	C	A		nonIDM	37.7
S1_4533569	1	4533569	0	0	0	C	T		nonIDM	37.7
S1_4564191	1	4564191	0	0.06	0.06	A	C	A	GlazPoly	38.1
S1_4565522	1	4565522	0	0	0	T	C		nonIDM	38.1
S1_4565554	1	4565554	0	0	0	C	A		tagIDM	38.1
S1_4565560	1	4565560	0.05	0	0.05	T	C		nonIDM	38.1
S1_4570855	1	4570855	0	1	1	G	A	G	Strict	38.3
S1_4570872	1	4570872	0	1	1	T	C	T	Strict	38.3
S1_4570886	1	4570886	0.05	0	0.05	A	C		nonIDM	38.3
S1_4573650	1	4573650	0.25	0.56	0.31	G	C		nonIDM	38.3
S1_4573682	1	4573682	0.65	0	0.65	C	G		nonIDM	38.3
S1_4576155	1	4576155	0.8	1	0.2	G	C		nonIDM	38.3
S1_4576167	1	4576167	0.55	0	0.55	A	G		nonIDM	38.3
S1_4576319	1	4576319	0	0.19	0.19	T	G	T	GlazPoly	38.3
S1_4610386	1	4610386	0.45	1	0.55	C	T		nonIDM	38.9
S1_4610434	1	4610434	0	0	0	C	G		nonIDM	38.9
S1_4664327	1	4664327	0	1	1	T	A	T	Strict	39.5
S1_4664334	1	4664334	0.65	0	0.65	A	G		nonIDM	39.5
S1_4664356	1	4664356	0.1	0	0.1	C	T		nonIDM	39.5
S1_4667911	1	4667911	0.3	1	0.7	G	C		nonIDM	39.5
S1_4667966	1	4667966	0	1	1	A	G	A	Strict	39.5
S1_4668044	1	4668044	0.65	1	0.35	T	G		nonIDM	39.5
S1_4668084	1	4668084	0	1	1	A	T	A	Strict	39.5
S1_4668132	1	4668132	0.35	1	0.65	A	G		nonIDM	39.5
S1_4668997	1	4668997	0	1	1	G	A	G	Strict	39.5
S1_4669160	1	4669160	0	1	1	T	C	T	Strict	39.5
S1_4673698	1	4673698	0	1	1	C	T	C	Strict	39.6
S1_4673705	1	4673705	0	1	1	C	T	C	Strict	39.6
S1_4673752	1	4673752	0	0	0	A	G		tagIDM	39.6
S1_4673804	1	4673804	0.05	0	0.05	A	C		nonIDM	39.6
S1_4683093	1	4683093	0	1	1	G	A	G	Strict	39.8
S1_4687582	1	4687582	0.45	1	0.55	T	C		nonIDM	39.9
S1_4687590	1	4687590	0.45	1	0.55	A	G		nonIDM	39.9
S1_4687596	1	4687596	0.05	0	0.05	T	A		nonIDM	39.9
S1_4687792	1	4687792	0	1	1	C	T	C	Strict	39.9
S1_4696087	1	4696087	0	0.44	0.44	C	T	C	GlazPoly	40
S1_4696096	1	4696096	0.4	0	0.4	T	A		nonIDM	40
S1_4696115	1	4696115	0.05	0	0.05	A	T		nonIDM	40
S1_4696138	1	4696138	0.4	0	0.4	C	T		nonIDM	40
S1_4696296	1	4696296	0	0	0	C	T		tagIDM	40
S1_4743569	1	4743569	0	0.12	0.12	A	C	A	GlazPoly	41
S1_4743583	1	4743583	0	0.25	0.25	A	G	A	GlazPoly	41
S1_4747122	1	4747122	0.05	0	0.05	G	T		nonIDM	41
S1_4747130	1	4747130	0.05	0	0.05	T	C		nonIDM	41
S1_4747170	1	4747170	0.05	0	0.05	G	C		nonIDM	41
S1_4751977	1	4751977	0	0	0	A	T		nonIDM	40.9
S1_4752012	1	4752012	0	0	0	G	T		nonIDM	40.9
S1_4752025	1	4752025	0	0.06	0.06	A	C	A	GlazPoly	40.9
S1_4752031	1	4752031	0	1	1	T	G	T	Strict	40.9
S1_4752100	1	4752100	0	0.12	0.12	G	A	G	GlazPoly	40.9
S1_4752301	1	4752301	0.2	0	0.2	T	A		nonIDM	41
S1_4752340	1	4752340	0	1	1	T	G	T	Strict	41
S1_4752777	1	4752777	0	0	0	C	T		nonIDM	41.2
S1_4752782	1	4752782	0	0.88	0.88	G	T	G	GlazPoly	41.2
S1_4752790	1	4752790	0.35	0	0.35	C	G		nonIDM	41.2
S1_4752800	1	4752800	0	0.56	0.56	G	T	G	GlazPoly	41.2
S1_4752810	1	4752810	0	0	0	A	G		nonIDM	41.2
S1_4752817	1	4752817	0	0	0	T	A		nonIDM	41.2
S1_4752847	1	4752847	0	0.12	0.12	T	C	T	GlazPoly	41.2
S1_4752857	1	4752857	0.15	0	0.15	T	C		nonIDM	41.2
S1_4752869	1	4752869	0.35	0	0.35	T	G		nonIDM	41.2
S1_4752875	1	4752875	0	0.25	0.25	T	G	T	GlazPoly	41.2
S1_4753261	1	4753261	0.2	0.06	0.14	G	T		nonIDM	41
S1_4753288	1	4753288	0.2	0.06	0.14	C	A		nonIDM	41
S1_4766161	1	4766161	0	1	1	C	T	C	Strict	41.3
S1_4766195	1	4766195	0	0.25	0.25	G	C	G	GlazPoly	41.3
S1_4766223	1	4766223	0	0.12	0.12	C	G	C	GlazPoly	41.3
S1_4766233	1	4766233	0.25	0	0.25	C	T		nonIDM	41.3
S1_4766248	1	4766248	0	0	0	G	T		nonIDM	41.3
S1_4766296	1	4766296	0	0	0	G	A		nonIDM	41.3
S1_4766303	1	4766303	0	1	1	A	G	A	Strict	41.3
S1_4766335	1	4766335	0	0.25	0.25	T	C	T	GlazPoly	41.3
S1_4766340	1	4766340	0	0	0	C	T		nonIDM	41.3
S1_4782380	1	4782380	0	0	0	G	A		nonIDM	41.5
S1_4782393	1	4782393	0	0	0	G	A		tagIDM	41.5
S1_4782414	1	4782414	0.2	0	0.2	A	G		nonIDM	41.5
S1_4782423	1	4782423	0	1	1	A	G	A	Strict	41.5
S1_4782585	1	4782585	0	0	0	C	A		nonIDM	41.5
S1_4782623	1	4782623	0	0	0	T	C		nonIDM	41.5
S1_4782697	1	4782697	0.5	0	0.5	T	C		nonIDM	41.5
S1_4782749	1	4782749	0	0	0	G	T		nonIDM	41.5
S1_4782968	1	4782968	0.45	0	0.45	C	T		nonIDM	41.5
S1_4782992	1	4782992	0	0	0	G	A		nonIDM	41.5
S1_4814833	1	4814833	0.15	0	0.15	G	T		nonIDM	41.6
S1_4814853	1	4814853	0	1	1	A	T	A	Strict	41.6
S1_4815421	1	4815421	0	0.25	0.25	C	T	C	GlazPoly	41.6
S1_4818247	1	4818247	0	0.25	0.25	G	A	G	GlazPoly	41.6
S1_4825085	1	4825085	0	1	1	A	G	A	Strict	41.7
S1_4825103	1	4825103	0	1	1	G	T	G	Strict	41.7
S1_4855733	1	4855733	0.15	0	0.15	A	G		nonIDM	42
S1_4855740	1	4855740	0	0.12	0.12	C	G	C	GlazPoly	42
S1_4855747	1	4855747	0	0.25	0.25	C	T	C	GlazPoly	42
S1_4855768	1	4855768	0	0.38	0.38	C	T	C	GlazPoly	42
S1_4855796	1	4855796	0	0.69	0.69	C	T	C	GlazPoly	42
S1_4857025	1	4857025	0.45	0	0.45	C	G		nonIDM	42
S1_4857043	1	4857043	0	0.38	0.38	A	C	A	GlazPoly	42
S1_4857057	1	4857057	0	1	1	C	T	C	Strict	42
S1_4857064	1	4857064	0	0.25	0.25	G	A	G	GlazPoly	42
S1_4857195	1	4857195	0	0.62	0.62	A	G	A	GlazPoly	42
S1_4857200	1	4857200	0	0.38	0.38	A	C	A	GlazPoly	42
S1_4861188	1	4861188	0.75	1	0.25	A	G		nonIDM	42
S1_4861218	1	4861218	0	0	0	C	G		nonIDM	41.9
S1_4885715	1	4885715	0	0.31	0.31	T	G	T	GlazPoly	42.1
S1_4885738	1	4885738	0	1	1	T	C	T	Strict	42.1
S1_4885764	1	4885764	0.1	0	0.1	T	C		nonIDM	42.1
S1_4885785	1	4885785	0	1	1	G	C	G	Strict	42.1
S1_4890146	1	4890146	0.85	0	0.85	C	A		nonIDM	42
S1_4890196	1	4890196	0	0.31	0.31	C	T	C	GlazPoly	42
S1_4890220	1	4890220	0.4	0	0.4	C	T		nonIDM	42
S1_4890290	1	4890290	0.05	0	0.05	C	T		nonIDM	42
S1_4890312	1	4890312	0	1	1	T	C	T	Strict	42
S1_4890330	1	4890330	0.05	0	0.05	C	A		nonIDM	42
S1_4890335	1	4890335	0.4	0	0.4	C	G		nonIDM	42
S1_4890344	1	4890344	0.5	0	0.5	C	T		nonIDM	42
S1_4893985	1	4893985	0	0.38	0.38	C	G	C	GlazPoly	42.1
S1_4894008	1	4894008	0	1	1	C	T	C	Strict	42.1
S1_4894014	1	4894014	0	0	0	T	C		nonIDM	42.1
S1_4894035	1	4894035	0.3	1	0.7	G	A		nonIDM	42.1
S1_4894068	1	4894068	0.1	0	0.1	G	A		nonIDM	42.1
S1_4894194	1	4894194	0	1	1	G	A	G	Strict	42.1
S1_4894810	1	4894810	0.4	0	0.4	A	G		nonIDM	42.1
S1_4894940	1	4894940	0.35	0	0.35	C	T		nonIDM	42.1
S1_4895008	1	4895008	0.25	1	0.75	G	A		nonIDM	42
S1_4895019	1	4895019	0	0.19	0.19	G	A	G	GlazPoly	42
S1_4895031	1	4895031	0.1	0	0.1	A	C		nonIDM	42
S1_4895247	1	4895247	0	0	0	G	T		nonIDM	41.9
S1_4895268	1	4895268	0.55	0	0.55	C	A		nonIDM	41.9
S1_4895280	1	4895280	0	0.19	0.19	T	C	T	GlazPoly	41.9
S1_4896289	1	4896289	0	0	0	C	G		nonIDM	42
S1_4896646	1	4896646	0	0	0	T	C		nonIDM	42
S1_4919374	1	4919374	0.05	0	0.05	T	G		nonIDM	42.2
S1_4928947	1	4928947	0.1	0	0.1	C	A		nonIDM	43
S1_4929751	1	4929751	0.15	0	0.15	C	G		nonIDM	43.1
S1_4935603	1	4935603	0.05	0	0.05	A	C		nonIDM	43.2
S1_4935645	1	4935645	0.75	0	0.75	C	T		nonIDM	43.2
S1_4935777	1	4935777	0.05	0	0.05	A	G		nonIDM	43.2
S1_4935782	1	4935782	0.15	0	0.15	A	G		nonIDM	43.2
S1_4935801	1	4935801	0.55	0	0.55	A	C		nonIDM	43.2
S1_4935815	1	4935815	0.1	0	0.1	A	G		nonIDM	43.2
S1_4935916	1	4935916	0.65	0	0.65	A	G		nonIDM	43
S1_4935935	1	4935935	0.2			G	A		nonIDM	43
S1_4936152	1	4936152	0.05	0	0.05	C	A		nonIDM	43.4
S1_4943385	1	4943385	0	0	0	C	A		nonIDM	43.4
S1_4944106	1	4944106	0	0.12	0.12	T	C	T	GlazPoly	43.4
S1_4980044	1	4980044	0.05	0	0.05	C	G		nonIDM	43.2
S1_5088188	1	5088188	0.1	0	0.1	A	C		nonIDM	43
S1_5088334	1	5088334	0.1	0	0.1	A	T		nonIDM	43
S1_5092230	1	5092230	0.2	0	0.2	A	G		nonIDM	43.1
S1_5092296	1	5092296	0.5	0	0.5	T	C		nonIDM	43.1
S1_5092305	1	5092305	0	0	0	T	C		nonIDM	43.1
S1_5130716	1	5130716	0.1	0	0.1	C	T		nonIDM	43.5
S1_5130866	1	5130866	0	0.38	0.38	C	T	C	GlazPoly	43.5
S1_5131376	1	5131376	0.4	1	0.6	T	A		nonIDM	43.5
S1_5134840	1	5134840	0.2	0	0.2	A	T		nonIDM	43.2
S1_5134879	1	5134879	0.2	0	0.2	C	T		nonIDM	43.2
S1_5137929	1	5137929	0	0.06	0.06	G	C	G	GlazPoly	43.3
S1_5138042	1	5138042	0.6	0	0.6	C	T		nonIDM	43.3
S1_5138070	1	5138070	0.25	0	0.25	C	T		nonIDM	43.3
S1_5148207	1	5148207	0.25	0	0.25	G	A		nonIDM	43.4
S1_5151547	1	5151547	0	0.25	0.25	C	T	C	GlazPoly	43.7
S1_5151618	1	5151618	0.15	0	0.15	G	A		nonIDM	43.7
S1_5151992	1	5151992	0.25	0.5	0.25	C	T		nonIDM	43.8
S1_5163712	1	5163712	0.3	0	0.3	G	A		nonIDM	43.4
S1_5167953	1	5167953	0.2	0	0.2	G	A		nonIDM	43.5
S1_5167960	1	5167960	0	0.44	0.44	G	A	G	GlazPoly	43.5
S1_5167969	1	5167969	0.05	0	0.05	G	A		nonIDM	43.6
S1_5170037	1	5170037	0.15	0	0.15	T	C		nonIDM	43.6
S1_5170066	1	5170066	0.45	0	0.45	C	A		nonIDM	43.6
S1_5170236	1	5170236	0.55	0	0.55	A	T		nonIDM	43.6
S1_5170242	1	5170242	0.1	0	0.1	C	T		nonIDM	43.6
S1_5178655	1	5178655	0.35	0	0.35	T	A		nonIDM	44.2
S1_5178662	1	5178662	0.25	0	0.25	G	C		nonIDM	44.2
S1_5178671	1	5178671	0.25	1	0.75	G	A		nonIDM	44.2
S1_5178763	1	5178763	0.25	0	0.25	T	C		nonIDM	44.2
S1_5178968	1	5178968	0.2	0	0.2	C	T		nonIDM	44.2
S1_5179086	1	5179086	0.05	0	0.05	G	A		nonIDM	44.2
S1_5180638	1	5180638	0.15	0	0.15	G	C		nonIDM	44.5
S1_5180680	1	5180680	0.5	1	0.5	A	G		nonIDM	44.5
S1_5180692	1	5180692	0	0	0	C	A		nonIDM	44.5
S1_5182011	1	5182011	0.15	0	0.15	C	A		nonIDM	44.7
S1_5182175	1	5182175	0.2	1	0.8	T	G		nonIDM	44.7
S1_5183599	1	5183599	0.3	0	0.3	A	C		nonIDM	44.9
S1_5195279	1	5195279	0.05	0	0.05	A	G		nonIDM	46.4
S1_5195287	1	5195287	0	0	0	G	C		nonIDM	46.4
S1_5209356	1	5209356	0.1	1	0.9	C	T		nonIDM	47.2
S1_5209377	1	5209377	0.1	0	0.1	T	C		nonIDM	47.2
S1_5209382	1	5209382	0.1	0	0.1	G	T		nonIDM	47.2
S1_5209389	1	5209389	0	0.12	0.12	T	C	T	GlazPoly	47.2
S1_5209415	1	5209415	0	0.12	0.12	G	A	G	GlazPoly	47.2
S1_5209420	1	5209420	0.1	0	0.1	G	C		nonIDM	47.2
S1_5209434	1	5209434	0	0.06	0.06	A	T	A	GlazPoly	47.2
S1_5244040	1	5244040	0.4	0	0.4	T	C		nonIDM	45.9
S1_5256078	1	5256078	0.45	0	0.45	T	C		nonIDM	45.5
S1_5256136	1	5256136	0	0.88	0.88	C	T	C	GlazPoly	45.5
S1_5256199	1	5256199	0.05	0	0.05	A	T		nonIDM	45.5
S1_5256559	1	5256559	0	1	1	A	G	A	Strict	45.6
S1_5256698	1	5256698	0.45	0	0.45	T	A		nonIDM	45.6
S1_5256709	1	5256709	0	0.69	0.69	A	C	A	GlazPoly	45.6
S1_5256756	1	5256756	0.3	0	0.3	T	G		nonIDM	45.6
S1_5256778	1	5256778	0	0.75	0.75	C	T	C	GlazPoly	45.6
S1_5256862	1	5256862	0.05	0	0.05	G	T		nonIDM	45.6
S1_5256870	1	5256870	0	0	0	A	G		nonIDM	45.6
S1_5256880	1	5256880	0.05	0	0.05	A	G		nonIDM	45.6
S1_5257099	1	5257099	0.45	0	0.45	C	G		nonIDM	45.6
S1_5264359	1	5264359	0.05	0	0.05	C	A		nonIDM	45.4
S1_5264372	1	5264372	0	1	1	A	T	A	Strict	45.4
S1_5264382	1	5264382	0	0.25	0.25	A	T	A	GlazPoly	45.4
S1_5268548	1	5268548	0	0.31	0.31	T	C	T	GlazPoly	45.3
S1_5268701	1	5268701	0	0.88	0.88	G	A	G	GlazPoly	45.3
S1_5268710	1	5268710	0	0	0	T	G		nonIDM	45.3
S1_5268732	1	5268732	0	0.88	0.88	C	G	C	GlazPoly	45.3
S1_5270733	1	5270733	0	0.25	0.25	T	A	T	GlazPoly	45.2
S1_5270778	1	5270778	0.05	0	0.05	T	A		nonIDM	45.2
S1_5275957	1	5275957	0	0	0	A	G		nonIDM	45
S1_5279804	1	5279804	0.1	0.12	0.02	C	T		nonIDM	44.9
S1_5279860	1	5279860	0.1	0	0.1	A	C		nonIDM	44.9
S1_5279883	1	5279883	0.25	0	0.25	C	T		nonIDM	44.9
S1_5286256	1	5286256	0.15	0	0.15	T	C		nonIDM	44.7
S1_5286266	1	5286266	0.1	0	0.1	T	A		nonIDM	44.7
S1_5298513	1	5298513	0.25	0.12	0.12	A	G		nonIDM	44.6
S1_5298532	1	5298532	0.05	0.12	0.08	T	C		nonIDM	44.6
S1_5299732	1	5299732	0.25	0.06	0.19	C	T		nonIDM	44.7
S1_5299746	1	5299746	0.3	0	0.3	C	T		nonIDM	44.5
S1_5300108	1	5300108	0	1	1	T	A	T	Strict	44.5
S1_5300114	1	5300114	0	1	1	G	T	G	Strict	44.5
S1_5300323	1	5300323	0	0.38	0.38	A	G	A	GlazPoly	44.6
S1_5300329	1	5300329	0.3	0	0.3	A	T		nonIDM	44.6
S1_5300337	1	5300337	0	1	1	A	C	A	Strict	44.6
S1_5300345	1	5300345	0.05	0	0.05	T	A		nonIDM	44.6
S1_5300564	1	5300564	0.05	0.12	0.08	A	C		nonIDM	44.6
S1_5300607	1	5300607	0.05	0	0.05	G	A		nonIDM	44.6
S1_5300657	1	5300657	0	1	1	G	A	G	Strict	44.6
S1_5300668	1	5300668	0.1	0	0.1	G	T		nonIDM	44.6
S1_5300698	1	5300698	0	0.94	0.94	A	G	A	GlazPoly	44.6
S1_5312881	1	5312881	0.05	0	0.05	G	T		nonIDM	44.8
S1_5312939	1	5312939	0.3	0	0.3	A	T		nonIDM	44.9
S1_5313170	1	5313170	0.15	0	0.15	A	G		nonIDM	44.9
S1_5313192	1	5313192	0.7	0	0.7	T	C		nonIDM	45.1
S1_5328330	1	5328330	0.05	0	0.05	C	T		nonIDM	44.9
S1_5332930	1	5332930	0.2	1	0.8	C	A		nonIDM	44.8
S1_5333090	1	5333090	0	1	1	A	C	A	Strict	44.8
S1_5333115	1	5333115	0.55	0.12	0.43	A	G		nonIDM	44.8
S1_5333132	1	5333132	0.55	0	0.55	G	C		nonIDM	44.8
S1_5333140	1	5333140	0	0.88	0.88	A	T	A	GlazPoly	44.8
S1_5333324	1	5333324	0.25	0	0.25	C	T		nonIDM	44.8
S1_5333336	1	5333336	0	0.88	0.88	C	T	C	GlazPoly	44.8
S1_5333343	1	5333343	0.45	0	0.45	G	A		nonIDM	44.8
S1_5333353	1	5333353	0	0.75	0.75	T	C	T	GlazPoly	44.8
S1_5333386	1	5333386	0.35	0	0.35	C	T		nonIDM	44.8
S1_5333396	1	5333396	0.05	0	0.05	G	A		nonIDM	44.8
S1_5333412	1	5333412	0	1	1	T	C	T	Strict	44.8
S1_5333418	1	5333418	0.25	0	0.25	T	A		nonIDM	44.9
S1_5333646	1	5333646	0	0.44	0.44	T	C	T	GlazPoly	45
S1_5333653	1	5333653	0	0.69	0.69	C	T	C	GlazPoly	45
S1_5350146	1	5350146	0	0.81	0.81	A	C	A	GlazPoly	45
S1_5350180	1	5350180	0.1	0	0.1	C	A		nonIDM	45
S1_5350249	1	5350249	0	0.19	0.19	C	T	C	GlazPoly	45
S1_5382600	1	5382600	0	0.75	0.75	C	T	C	GlazPoly	45.2
S1_5382683	1	5382683	0.2	0	0.2	C	T		nonIDM	45.2
S1_5404338	1	5404338	0	0.31	0.31	G	A	G	GlazPoly	45.4
S1_5409247	1	5409247	0.15	0	0.15	T	C		nonIDM	45.3
S1_5409255	1	5409255	0.1	0	0.1	G	C		nonIDM	45.3
S1_5409265	1	5409265	0	1	1	G	T	G	Strict	45.3
S1_5409292	1	5409292	0.15	0	0.15	A	G		nonIDM	45.3
S1_5409341	1	5409341	0	0	0	A	C		nonIDM	45.3
S1_5414164	1	5414164	0.3	0	0.3	C	T		nonIDM	45.3
S1_5414170	1	5414170	0	0	0	T	C		nonIDM	45.3
S1_5414407	1	5414407	0	0	0	A	G		nonIDM	45.3
S1_5414426	1	5414426	0.4	0.69	0.29	G	A		nonIDM	45.3
S1_6155551	1	6155551	0.55	0.88	0.32	A	G		nonIDM	45.9
S1_6222399	1	6222399	0	0	0	T	C		nonIDM	46.1
S1_6222426	1	6222426	0.05	0	0.05	A	C		nonIDM	46.1
S1_6222435	1	6222435	0	0.25	0.25	T	A	T	GlazPoly	46.1
S1_6222444	1	6222444	0	0.06	0.06	C	T	C	GlazPoly	46.1
S1_6222498	1	6222498	0	0.88	0.88	A	T	A	GlazPoly	46.1
S1_6222543	1	6222543	0.2	0	0.2	C	T		nonIDM	46.1
S1_6222550	1	6222550	0	0.06	0.06	G	A	G	GlazPoly	46.1
S1_6222600	1	6222600	0.5	0	0.5	T	A		nonIDM	46.1
S1_6222612	1	6222612	0	0	0	G	T		nonIDM	46.1
S1_6228608	1	6228608	0.15	0	0.15	T	C		nonIDM	46.1
S1_6228613	1	6228613	0	1	1	C	T	C	Strict	46.1
S1_6228641	1	6228641	0	1	1	T	G	T	Strict	46.1
S1_6228651	1	6228651	0.45	0	0.45	A	C		nonIDM	46.1
S1_6228661	1	6228661	0.6	0	0.6	C	T		nonIDM	46.1
S1_6231874	1	6231874	0	0	0	G	A		nonIDM	46.1
S1_6231910	1	6231910	0	0.12	0.12	T	A	T	GlazPoly	46.1
S1_6232002	1	6232002	0	0	0	C	G		nonIDM	46.1
S1_6232046	1	6232046	0	0.31	0.31	G	A	G	GlazPoly	46.1
S1_6232063	1	6232063	0.1	0	0.1	T	C		nonIDM	46.1
S1_6232076	1	6232076	0	0.12	0.12	C	G	C	GlazPoly	46.1
S1_6232092	1	6232092	0.35	1	0.65	T	C		nonIDM	46.1
S1_6232100	1	6232100	0	0.25	0.25	G	T	G	GlazPoly	46.1
S1_6232113	1	6232113	0	0.25	0.25	G	A	G	GlazPoly	46.1
S1_6234380	1	6234380	0	0.38	0.38	T	G	T	GlazPoly	46.2
S1_6234401	1	6234401	0	1	1	A	T	A	Strict	46.2
S1_6234416	1	6234416	0	0.5	0.5	A	G	A	GlazPoly	46.2
S1_6235687	1	6235687	0.1	0	0.1	A	G		nonIDM	46.2
S1_6236366	1	6236366	0	0.12	0.12	C	T	C	GlazPoly	46.2
S1_6237932	1	6237932	0	1	1	T	A	T	Strict	46.2
S1_6237976	1	6237976	0	1	1	C	G	C	Strict	46.2
S1_6238104	1	6238104	0	0	0	T	G		nonIDM	46.2
S1_6238133	1	6238133	0.15	0	0.15	T	A		nonIDM	46.2
S1_6238139	1	6238139	0	1	1	A	G	A	Strict	46.2
S1_6238220	1	6238220	0	1	1	G	A	G	Strict	46.2
S1_6238252	1	6238252	0.75	0	0.75	G	T		nonIDM	46.2
S1_6238258	1	6238258	0	1	1	G	A	G	Strict	46.2
S1_6238306	1	6238306	0.25	0	0.25	A	T		nonIDM	46.2
S1_6238353	1	6238353	0.25	0	0.25	G	C		nonIDM	46.2
S1_6238360	1	6238360	0.25	0	0.25	T	G		nonIDM	46.2
S1_6238380	1	6238380	0.4	0.06	0.34	A	G		nonIDM	46.2
S1_6238405	1	6238405	0.15	0	0.15	G	T		nonIDM	46.2
S1_6238486	1	6238486	0.25	0	0.25	C	T		nonIDM	46.2
S1_6241173	1	6241173	0.15	0	0.15	C	T		nonIDM	46.1
S1_6241319	1	6241319	0.2	0	0.2	A	G		nonIDM	46.1
S1_6241429	1	6241429	0	1	1	A	C	A	Strict	46.1
S1_6263640	1	6263640	0.3	0	0.3	C	T		nonIDM	45.9
S1_6263754	1	6263754	0.35	0	0.35	A	C		nonIDM	45.9
S1_6264725	1	6264725	0	1	1	C	T	C	Strict	45.8
S1_6264768	1	6264768	0	1	1	T	C	T	Strict	45.8
S1_6264800	1	6264800	0.05	0	0.05	C	T		nonIDM	45.8
S1_6264823	1	6264823	0	0.94	0.94	A	G	A	GlazPoly	45.8
S1_6265293	1	6265293	0.3	0	0.3	A	C		nonIDM	45.7
S1_6267268	1	6267268	0	1	1	G	T	G	Strict	46.1
S1_6267275	1	6267275	0	1	1	G	A	G	Strict	46.1
S1_6267344	1	6267344	0.1	0	0.1	C	T		nonIDM	46.1
S1_6267592	1	6267592	0	1	1	G	A	G	Strict	46.1
S1_6267664	1	6267664	0	1	1	G	A	G	Strict	46.1
S1_6267684	1	6267684	0.25	0	0.25	C	T		nonIDM	46.1
S1_6267825	1	6267825	0	0.12	0.12	G	A	G	GlazPoly	46.1
S1_6267892	1	6267892	0	0.29	0.29	G	A	G	GlazPoly	46.1
S1_6267932	1	6267932	0	0.19	0.19	G	C	G	GlazPoly	46.1
S1_6271931	1	6271931	0	1	1	G	A	G	Strict	46.1
S1_6272663	1	6272663	0	0.38	0.38	C	T	C	GlazPoly	46
S1_6275302	1	6275302	0.3	1	0.7	A	T		nonIDM	46
S1_6287598	1	6287598	0.25	0	0.25	A	G		nonIDM	46
S1_6287666	1	6287666	0	1	1	T	C	T	Strict	46
S1_6289573	1	6289573	0	0.25	0.25	A	T	A	GlazPoly	46
S1_6294463	1	6294463	0.55	0	0.55	G	C		nonIDM	46
S1_6294625	1	6294625	0.05	0	0.05	G	T		nonIDM	46
S1_6294710	1	6294710	0	0.06	0.06	A	T	A	GlazPoly	45.9
S1_6294715	1	6294715	0	0.31	0.31	G	A	G	GlazPoly	45.9
S1_6294817	1	6294817	0	0.81	0.81	A	G	A	GlazPoly	45.9
S1_6294827	1	6294827	0.05	0	0.05	C	T		nonIDM	45.9
S1_6294856	1	6294856	0	0.56	0.56	T	C	T	GlazPoly	46
S1_6294883	1	6294883	0.5	0	0.5	G	A		nonIDM	45.9
S1_6295180	1	6295180	0.5	0	0.5	G	T		nonIDM	46
S1_6295216	1	6295216	0.05	0	0.05	A	G		nonIDM	46
S1_6295255	1	6295255	0.5	0	0.5	C	T		nonIDM	46
S1_6295274	1	6295274	0	0.19	0.19	T	G	T	GlazPoly	46
S1_6295282	1	6295282	0.05	0	0.05	C	T		nonIDM	46
S1_6295339	1	6295339	0	0.06	0.06	C	T	C	GlazPoly	46
S1_6295396	1	6295396	0.2	0	0.2	A	T		nonIDM	46.1
S1_6295738	1	6295738	0.05	0	0.05	T	C		nonIDM	46.2
S1_6298625	1	6298625	0	0.31	0.31	G	T	G	GlazPoly	46.1
S1_6298639	1	6298639	0.35	0	0.35	G	A		nonIDM	46.1
S1_6298670	1	6298670	0.75	0	0.75	T	G		nonIDM	46.1
S1_6298680	1	6298680	0	0.31	0.31	G	T	G	GlazPoly	46.1
S1_6302382	1	6302382	0	1	1	G	C	G	Strict	46
S1_6302425	1	6302425	0.05	0	0.05	C	T		nonIDM	46
S1_6302623	1	6302623	0	0	0	G	T		nonIDM	46
S1_6302789	1	6302789	0.1	0	0.1	A	G		nonIDM	46
S1_6302824	1	6302824	0.05	0	0.05	C	G		nonIDM	46
S1_6303363	1	6303363	0	0.19	0.19	A	T	A	GlazPoly	46
S1_6303390	1	6303390	0	1	1	A	G	A	Strict	46
S1_6303403	1	6303403	0	0.19	0.19	T	C	T	GlazPoly	46
S1_6305217	1	6305217	0	0	0	T	A		nonIDM	46
S1_6305291	1	6305291	0.2	0	0.2	A	T		nonIDM	46
S1_6309613	1	6309613	0	0	0	G	C		nonIDM	46.2
S1_6314845	1	6314845	0.05	1	0.95	C	A		nonIDM	46.3
S1_6314856	1	6314856	0.05	0	0.05	C	A		nonIDM	46.3
S1_6318988	1	6318988	0.35	0	0.35	T	A		nonIDM	46.3
S1_6323228	1	6323228	0.15	0	0.15	T	A		nonIDM	46.4
S1_6323238	1	6323238	0.15	0	0.15	C	T		nonIDM	46.4
S1_6324499	1	6324499	0.6	1	0.4	C	A		nonIDM	46.4
S1_6324511	1	6324511	0	0	0	T	A		nonIDM	46.4
S1_6324522	1	6324522	0.5	1	0.5	A	G		nonIDM	46.4
S1_6324528	1	6324528	0	1	1	G	T	G	Strict	46.4
S1_6324540	1	6324540	0	0.19	0.19	A	C	A	GlazPoly	46.4
S1_6324610	1	6324610	0	0	0	T	G		nonIDM	46.4
S1_6324615	1	6324615	0	1	1	G	A	G	Strict	46.4
S1_6324647	1	6324647	0.05	0	0.05	C	T		nonIDM	46.4
S1_6324684	1	6324684	0	0.06	0.06	T	G	T	GlazPoly	46.4
S1_6324885	1	6324885	0.05	0	0.05	G	A		nonIDM	46.4
S1_6324939	1	6324939	0.05	0	0.05	A	T		nonIDM	46.4
S1_6324967	1	6324967	0.6	0	0.6	T	G		nonIDM	46.4
S1_6325036	1	6325036	0.35	0	0.35	T	C		nonIDM	46.4
S1_6325049	1	6325049	0.15	0	0.15	T	A		nonIDM	46.4
S1_6326906	1	6326906	0.35	0.38	0.03	T	C		nonIDM	46.5
S1_6326932	1	6326932	0.35	0	0.35	G	A		nonIDM	46.5
S1_6326950	1	6326950	0.6	0	0.6	T	C		nonIDM	46.5
S1_6326973	1	6326973	0	0.06	0.06	T	C	T	GlazPoly	46.5
S1_6327073	1	6327073	0.05	0	0.05	C	A		nonIDM	46.5
S1_6327094	1	6327094	0.05	0	0.05	A	T		nonIDM	46.5
S1_6327112	1	6327112	0	1	1	C	G	C	Strict	46.5
S1_6329956	1	6329956	0.5	1	0.5	G	A		nonIDM	46.5
S1_6337279	1	6337279	0	0.12	0.12	C	G	C	GlazPoly	46.5
S1_6337397	1	6337397	0	0.25	0.25	C	A	C	GlazPoly	46.5
S1_6339343	1	6339343	0.55	1	0.45	C	A		nonIDM	46.5
S1_6339352	1	6339352	0	0.5	0.5	A	C	A	GlazPoly	46.5
S1_6339358	1	6339358	0.35	1	0.65	A	G		nonIDM	46.5
S1_6369707	1	6369707	0	0.12	0.12	C	T	C	GlazPoly	46.3
S1_6369712	1	6369712	0	0.31	0.31	C	T	C	GlazPoly	46.3
S1_6369827	1	6369827	0.3	1	0.7	C	A		nonIDM	46.3
S1_6370505	1	6370505	0.3	1	0.7	A	G		nonIDM	46.3
S1_6371689	1	6371689	0	0.88	0.88	G	A	G	GlazPoly	46.3
S1_6371712	1	6371712	0.65	0.81	0.16	C	T		nonIDM	46.3
S1_6379547	1	6379547	0	1	1	A	T	A	Strict	46.6
S1_6379625	1	6379625	0.35	0	0.35	G	T		nonIDM	46.6
S1_6379666	1	6379666	0	1	1	T	A	T	Strict	46.6
S1_6379698	1	6379698	0	0.81	0.81	T	G	T	GlazPoly	46.6
S1_6379754	1	6379754	0	0.12	0.12	T	A	T	GlazPoly	46.6
S1_6380357	1	6380357	0.45	0	0.45	A	G		nonIDM	46.5
S1_6380372	1	6380372	0.2	0	0.2	A	G		nonIDM	46.5
S1_6380438	1	6380438	0.3	0	0.3	C	T		nonIDM	46.5
S1_6380450	1	6380450	0	0	0	G	T		nonIDM	46.5
S1_6380480	1	6380480	0.3	0	0.3	G	A		nonIDM	46.5
S1_6380531	1	6380531	0	1	1	T	G	T	Strict	46.5
S1_6381060	1	6381060	0.15	0	0.15	T	C		nonIDM	46.5
S1_6382705	1	6382705	0.45	0	0.45	C	G		nonIDM	46.4
S1_6382938	1	6382938	0.15	0	0.15	A	T		nonIDM	46.5
S1_6387682	1	6387682	0.6	0	0.6	T	A		nonIDM	46.6
S1_6387710	1	6387710	0.1	0	0.1	T	C		nonIDM	46.6
S1_6387728	1	6387728	0.6	1	0.4	T	C		nonIDM	46.6
S1_6391710	1	6391710	0.05	0	0.05	T	G		nonIDM	46.6
S1_6391742	1	6391742	0.2	0	0.2	G	A		nonIDM	46.6
S1_6391784	1	6391784	0	0.06	0.06	C	A	C	GlazPoly	46.6
S1_6391839	1	6391839	0.2	0	0.2	T	A		nonIDM	46.6
S1_6398101	1	6398101	0	1	1	G	A	G	Strict	46.6
S1_6398123	1	6398123	0	1	1	G	T	G	Strict	46.6
S1_6398806	1	6398806	0	1	1	G	T	G	Strict	46.6
S1_6398823	1	6398823	0	1	1	A	T	A	Strict	46.6
S1_6398942	1	6398942	0	0	0	C	T		nonIDM	46.6
S1_6399771	1	6399771	0	1	1	G	C	G	Strict	46.6
S1_6410295	1	6410295	0.05	0	0.05	C	A		nonIDM	46.6
S1_6506358	1	6506358	0.15	0	0.15	G	T		nonIDM	46.2
S1_6506380	1	6506380	0.5	0.06	0.44	T	C		nonIDM	46.2
S1_6506393	1	6506393	0.05	0.12	0.08	A	T		nonIDM	46.2
S1_6525507	1	6525507	0	0	0	A	C		nonIDM	46.2
S1_6525790	1	6525790	0	0.94	0.94	G	A	G	GlazPoly	46.2
S1_6525808	1	6525808	0.15	0.12	0.02	A	G		nonIDM	46.3
S1_6525832	1	6525832	0	0.94	0.94	T	C	T	GlazPoly	46.3
S1_6531862	1	6531862	0	0	0	A	C		nonIDM	46.3
S1_6533591	1	6533591	0.15	0.17	0.02	T	C		nonIDM	46.3
S1_6535330	1	6535330	0.15	0	0.15	A	G		nonIDM	46.3
S1_6535363	1	6535363	0.15	0	0.15	T	G		nonIDM	46.3
S1_6535477	1	6535477	0	0	0	C	A		nonIDM	46.3
S1_6535482	1	6535482	0.05	0	0.05	C	T		nonIDM	46.3
S1_6555094	1	6555094	0.3	0.06	0.24	A	T		nonIDM	46.2
S1_6555732	1	6555732	0	1	1	T	A	T	Strict	46.2
S1_6555758	1	6555758	0.5	0	0.5	T	C		nonIDM	46.2
S1_6555776	1	6555776	0	1	1	G	T	G	Strict	46.2
S1_6588961	1	6588961	0.1	0	0.1	C	T		nonIDM	46.2
S1_6589140	1	6589140	0	0.38	0.38	C	G	C	GlazPoly	46.2
S1_6589177	1	6589177	0.05	0.81	0.76	A	G		tagIDM	46.2
S1_6589200	1	6589200	0.1	0	0.1	C	A		nonIDM	46.2
S1_6589208	1	6589208	0.05	1	0.95	C	A		tagIDM	46.2
S1_6639790	1	6639790	0.6	0	0.6	G	T		nonIDM	46
S1_6639832	1	6639832	0.6	0	0.6	A	C		nonIDM	46
S1_6639973	1	6639973	0	0	0	G	C		nonIDM	46
S1_6639988	1	6639988	0	1	1	T	C	T	Strict	46
S1_6640125	1	6640125	0	1	1	C	T	C	Strict	46
S1_6656872	1	6656872	0	0.38	0.38	G	C	G	GlazPoly	46
S1_6656896	1	6656896	0.05	0	0.05	C	T		nonIDM	46
S1_6667507	1	6667507	0.25	0	0.25	C	T		nonIDM	46
S1_6667532	1	6667532	0.4	0	0.4	A	G		nonIDM	46
S1_6667618	1	6667618	0	0.62	0.62	T	C	T	GlazPoly	46
S1_6689276	1	6689276	0.15	0	0.15	C	T		nonIDM	46.2
S1_6689283	1	6689283	0.25	0	0.25	C	A		nonIDM	46.2
S1_6689312	1	6689312	0.05	0	0.05	C	G		nonIDM	46.3
S1_6689333	1	6689333	0	0.62	0.62	G	C	G	GlazPoly	46.2
S1_6689354	1	6689354	0.05	1	0.95	G	A		nonIDM	46.3
S1_6689567	1	6689567	0.65	0	0.65	G	T		nonIDM	46.4
S1_6692913	1	6692913	0.25	0	0.25	C	T		nonIDM	46.3
S1_6693233	1	6693233	0	1	1	T	C	T	Strict	46.4
S1_6696064	1	6696064	0.25	0	0.25	A	T		nonIDM	46.2
S1_6708477	1	6708477	0.1	0	0.1	T	G		nonIDM	46.2
S1_6710644	1	6710644	0	0	0	G	C		nonIDM	46.3
S1_6710649	1	6710649	0.1	0	0.1	G	A		nonIDM	46.3
S1_6710654	1	6710654	0	0.06	0.06	A	G	A	GlazPoly	46.3
S1_6710721	1	6710721	0.05	0	0.05	G	T		nonIDM	46.3
S1_6712091	1	6712091	0	0.5	0.5	T	A	T	GlazPoly	46.3
S1_6712097	1	6712097	0	0.75	0.75	T	A	T	GlazPoly	46.3
S1_6720832	1	6720832	0.3	1	0.7	G	A		nonIDM	46.5
S1_6793825	1	6793825	0.3	0	0.3	G	C		nonIDM	46.8
S1_6793850	1	6793850	0.1	0	0.1	T	G		nonIDM	46.8
S1_6793857	1	6793857	0	0	0	G	T		nonIDM	46.8
S1_6793869	1	6793869	0	0.88	0.88	A	T	A	GlazPoly	46.8
S1_6793874	1	6793874	0.1	0	0.1	G	T		nonIDM	46.8
S1_6795424	1	6795424	0	0	0	G	C		nonIDM	46.8
S1_6795436	1	6795436	0	0	0	T	C		nonIDM	46.8
S1_6795444	1	6795444	0.05	0	0.05	C	T		nonIDM	46.8
S1_6795471	1	6795471	0	0	0	A	C		nonIDM	46.8
S1_6798669	1	6798669	0.15	1	0.85	A	G		nonIDM	46.9
S1_6798793	1	6798793	0.35	1	0.65	G	T		nonIDM	46.9
S1_6798801	1	6798801	0.05	0	0.05	A	G		nonIDM	46.9
S1_6798814	1	6798814	0	1	1	T	G	T	Strict	46.9
S1_6803976	1	6803976	0.6	0	0.6	G	T		nonIDM	46.9
S1_6804048	1	6804048	0	0	0	C	T		nonIDM	46.9
S1_6804129	1	6804129	0	0	0	G	T		nonIDM	46.9
S1_6806511	1	6806511	0.1	0	0.1	C	T		nonIDM	46.9
S1_6806516	1	6806516	0	1	1	A	T	A	Strict	46.9
S1_6806522	1	6806522	0.45	0	0.45	A	G		nonIDM	46.9
S1_6806879	1	6806879	0	1	1	C	T	C	Strict	46.9
S1_6806957	1	6806957	0	0	0	T	A		nonIDM	46.9
S1_6807046	1	6807046	0.05	0	0.05	G	A		nonIDM	46.9
S1_6807089	1	6807089	0	1	1	A	G	A	Strict	46.9
S1_6813531	1	6813531	0.5	0	0.5	G	A		nonIDM	46.9
S1_6813548	1	6813548	0.55	0	0.55	A	T		nonIDM	46.9
S1_6814555	1	6814555	0	1	1	A	T	A	Strict	46.9
S1_6814577	1	6814577	0.05	1	0.95	T	A		nonIDM	46.9
S1_6814585	1	6814585	0.1	0	0.1	A	G		nonIDM	46.9
S1_6814596	1	6814596	0.15	0	0.15	T	C		nonIDM	46.9
S1_6814876	1	6814876	0.45	0	0.45	G	A		nonIDM	46.9
S1_6816463	1	6816463	0	1	1	A	T	A	Strict	46.9
S1_6816499	1	6816499	0.05	0	0.05	G	A		nonIDM	46.9
S1_6816748	1	6816748	0.25	0.06	0.19	T	A		nonIDM	46.9
S1_6816788	1	6816788	0	0.44	0.44	C	T	C	GlazPoly	46.9
S1_6816818	1	6816818	0	0.44	0.44	A	G	A	GlazPoly	46.9
S1_6817022	1	6817022	0	0.88	0.88	T	G	T	GlazPoly	46.9
S1_6817038	1	6817038	0.1	0	0.1	A	T		nonIDM	46.9
S1_6817068	1	6817068	0.25	0.06	0.19	T	C		nonIDM	46.9
S1_6817073	1	6817073	0.35	0	0.35	T	C		nonIDM	46.9
S1_6829883	1	6829883	0.3	0	0.3	A	G		nonIDM	46.9
S1_6831272	1	6831272	0.4	0	0.4	T	C		nonIDM	46.9
S1_6831296	1	6831296	0.15	0	0.15	A	T		nonIDM	46.9
S1_6832579	1	6832579	0.2	0	0.2	T	A		nonIDM	46.9
S1_6832609	1	6832609	0	0	0	T	C		nonIDM	46.9
S1_6832621	1	6832621	0.3	0	0.3	G	A		nonIDM	46.9
S1_6833808	1	6833808	0	1	1	C	A	C	Strict	46.9
S1_6833813	1	6833813	0.2	0	0.2	A	G		nonIDM	46.9
S1_6833863	1	6833863	0	0	0	T	G		nonIDM	46.9
S1_6833878	1	6833878	0.15	0	0.15	A	T		nonIDM	46.9
S1_6874231	1	6874231	0	0.25	0.25	T	G	T	GlazPoly	46.7
S1_6874240	1	6874240	0.1	0	0.1	C	G		nonIDM	46.7
S1_6874255	1	6874255	0	0	0	T	G		nonIDM	46.7
S1_6874330	1	6874330	0.1	0	0.1	C	T		nonIDM	46.7
S1_6874336	1	6874336	0.15	0	0.15	A	C		nonIDM	46.7
S1_6874443	1	6874443	0.15	0	0.15	G	T		nonIDM	46.7
S1_6874449	1	6874449	0.1	0	0.1	A	C		nonIDM	46.7
S1_6874466	1	6874466	0.1	0	0.1	G	T		nonIDM	46.7
S1_6874490	1	6874490	0	0.06	0.06	T	C	T	GlazPoly	46.7
S1_6874936	1	6874936	0.15	0	0.15	T	A		nonIDM	46.7
S1_6875177	1	6875177	0.15	0	0.15	T	A		nonIDM	46.7
S1_6875210	1	6875210	0.05	0	0.05	T	C		nonIDM	46.6
S1_6875228	1	6875228	0.2	0	0.2	A	T		nonIDM	46.6
S1_6875235	1	6875235	0	0.06	0.06	G	T	G	GlazPoly	46.6
S1_6875313	1	6875313	0.2	1	0.8	C	T		nonIDM	46.6
S1_6875322	1	6875322	0.2	0	0.2	G	A		nonIDM	46.6
S1_6875543	1	6875543	0.25	0	0.25	A	G		nonIDM	46.6
S1_6875603	1	6875603	0	0.25	0.25	A	T	A	GlazPoly	46.6
S1_6875623	1	6875623	0.05	0	0.05	A	G		nonIDM	46.6
S1_6875830	1	6875830	0.2	1	0.8	C	T		nonIDM	46.6
S1_6875984	1	6875984	0.15	0	0.15	T	A		nonIDM	46.6
S1_6876153	1	6876153	0.1	0	0.1	T	G		nonIDM	46.6
S1_6876176	1	6876176	0.6	1	0.4	A	G		nonIDM	46.6
S1_6876192	1	6876192	0.3	0	0.3	A	T		nonIDM	46.6
S1_6876365	1	6876365	0	0.5	0.5	G	A	G	GlazPoly	46.6
S1_6881032	1	6881032	0.15	0	0.15	C	T		nonIDM	46.6
S1_6881076	1	6881076	0	0	0	T	C		nonIDM	46.6
S1_6881097	1	6881097	0.05	0	0.05	G	A		nonIDM	46.6
S1_6892929	1	6892929	0	0	0	C	T		nonIDM	46.7
S1_6892934	1	6892934	0	1	1	T	G	T	Strict	46.7
S1_6892964	1	6892964	0	1	1	T	C	T	Strict	46.7
S1_6892969	1	6892969	0	0	0	G	A		nonIDM	46.7
S1_6893002	1	6893002	0	0	0	A	T		nonIDM	46.7
S1_6893060	1	6893060	0	1	1	T	A	T	Strict	46.7
S1_6893068	1	6893068	0.35	1	0.65	A	C		nonIDM	46.7
S1_6893073	1	6893073	0.2	0	0.2	A	G		nonIDM	46.7
S1_6893101	1	6893101	0	0.94	0.94	C	G	C	GlazPoly	46.7
S1_6893106	1	6893106	0.2	0	0.2	A	C		nonIDM	46.7
S1_6915023	1	6915023	0.25	0	0.25	C	T		nonIDM	46.8
S1_6915041	1	6915041	0	1	1	T	C	T	Strict	46.8
S1_6915050	1	6915050	0.15	0.06	0.09	A	G		nonIDM	46.8
S1_6917901	1	6917901	0.4	0	0.4	C	T		nonIDM	46.8
S1_6917914	1	6917914	0	0.19	0.19	A	G	A	GlazPoly	46.8
S1_6917929	1	6917929	0	0.19	0.19	A	G	A	GlazPoly	46.8
S1_6978791	1	6978791	0	1	1	T	A	T	Strict	47
S1_6979622	1	6979622	0	0.19	0.19	C	T	C	GlazPoly	47
S1_6979661	1	6979661	0	0	0	A	C		nonIDM	47
S1_7013292	1	7013292	0.1	0	0.1	T	C		nonIDM	47.1
S1_7013316	1	7013316	0	0	0	A	C		nonIDM	47.1
S1_7019805	1	7019805	0.1	0	0.1	C	T		nonIDM	47.1
S1_7022310	1	7022310	0.15	0	0.15	T	A		nonIDM	47.1
S1_7022321	1	7022321	0.1	0	0.1	T	C		nonIDM	47.1
S1_7022405	1	7022405	0	0.62	0.62	T	C	T	GlazPoly	47.1
S1_7022428	1	7022428	0	0	0	G	A		nonIDM	47.1
S1_7022437	1	7022437	0.05	0	0.05	C	T		nonIDM	47.1
S1_7022446	1	7022446	0.3	0	0.3	C	T		nonIDM	47.1
S1_7022497	1	7022497	0.05	1	0.95	T	C		nonIDM	47.1
S1_7032363	1	7032363	0	1	1	T	A	T	Strict	47
S1_7032368	1	7032368	0	0.38	0.38	G	T	G	GlazPoly	47
S1_7032376	1	7032376	0.5	1	0.5	A	G		nonIDM	47
S1_7034563	1	7034563	0.3	1	0.7	A	G		nonIDM	47.1
S1_7034590	1	7034590	0	0.38	0.38	T	C	T	GlazPoly	47.1
S1_7034650	1	7034650	0.1	0	0.1	A	G		nonIDM	47.1
S1_7034661	1	7034661	0.1	0	0.1	G	A		nonIDM	47.1
S1_7038013	1	7038013	0.1	0.88	0.78	C	T		nonIDM	47.1
S1_7041538	1	7041538	0	0	0	A	C		nonIDM	47.1
S1_7041563	1	7041563	0.2	0	0.2	G	C		nonIDM	47.1
S1_7041577	1	7041577	0.05	0	0.05	A	G		nonIDM	47.1
S1_7041592	1	7041592	0	0.81	0.81	C	A	C	GlazPoly	47.1
S1_7041907	1	7041907	0	1	1	G	T	G	Strict	47.1
S1_7041923	1	7041923	0.05	0	0.05	A	T		nonIDM	47.1
S1_7043651	1	7043651	0.15	0	0.15	G	T		nonIDM	47.1
S1_7043682	1	7043682	0	1	1	G	A	G	Strict	47.1
S1_7047624	1	7047624	0	0.62	0.62	T	C	T	GlazPoly	47.1
S1_7047641	1	7047641	0.1	0	0.1	G	C		nonIDM	47.1
S1_7047646	1	7047646	0.05	0	0.05	A	C		nonIDM	47.1
S1_7047669	1	7047669	0	0.38	0.38	C	T	C	GlazPoly	47.1
S1_7047676	1	7047676	0	0.06	0.06	C	G	C	GlazPoly	47.1
S1_7047771	1	7047771	0.6	1	0.4	C	A		nonIDM	47.1
S1_7047801	1	7047801	0	0	0	T	G		nonIDM	47.1
S1_7050386	1	7050386	0.15	1	0.85	A	G		nonIDM	47.1
S1_7050408	1	7050408	0	1	1	G	A	G	Strict	47.1
S1_7050462	1	7050462	0.1	1	0.9	T	C		nonIDM	47.1
S1_7050533	1	7050533	0.1	1	0.9	A	G		nonIDM	47.1
S1_7050582	1	7050582	0.05	0	0.05	G	A		nonIDM	47.1
S1_7058179	1	7058179	0	0	0	A	G		nonIDM	47.1
S1_7096289	1	7096289	0.2	0	0.2	T	C		nonIDM	47.2
S1_7096296	1	7096296	0	0	0	G	A		nonIDM	47.2
S1_7096312	1	7096312	0	0	0	T	C		nonIDM	47.2
S1_7096758	1	7096758	0	1	1	T	C	T	Strict	47.2
S1_7258319	1	7258319	0.25	0.12	0.12	T	C		nonIDM	47.3
S1_7258355	1	7258355	0.25	0	0.25	A	T		nonIDM	47.3
S1_7303873	1	7303873	0.3	1	0.7	A	C		nonIDM	47.4
S1_7303989	1	7303989	0.1	0	0.1	G	T		nonIDM	47.4
S1_7307345	1	7307345	0.35	0	0.35	T	C		nonIDM	47.4
S1_7307361	1	7307361	0.05	0	0.05	A	G		nonIDM	47.4
S1_7318053	1	7318053	0.65	1	0.35	G	A		nonIDM	47.4
S1_7318439	1	7318439	0	1	1	A	G	A	Strict	47.4
S1_7318444	1	7318444	0	1	1	T	C	T	Strict	47.4
S1_7318474	1	7318474	0	0.31	0.31	A	G	A	GlazPoly	47.4
S1_7344326	1	7344326	0.85	1	0.15	A	C		nonIDM	47.5
S1_7344393	1	7344393	0	0.31	0.31	G	A	G	GlazPoly	47.5
S1_7344420	1	7344420	0	0.31	0.31	C	G	C	GlazPoly	47.5
S1_7344926	1	7344926	0.55	1	0.45	C	T		nonIDM	47.5
S1_7345085	1	7345085	0	1	1	A	G	A	Strict	47.5
S1_7345092	1	7345092	0.9	1	0.1	T	G		nonIDM	47.5
S1_7345157	1	7345157	0.2	0	0.2	G	A		nonIDM	47.5
S1_7345183	1	7345183	0	0.25	0.25	G	A	G	GlazPoly	47.5
S1_7345357	1	7345357	0.55	1	0.45	T	A		nonIDM	47.5
S1_7346342	1	7346342	0	1	1	G	C	G	Strict	47.5
S1_7346426	1	7346426	0.25	0	0.25	C	T		nonIDM	47.5
S1_7346467	1	7346467	0	0.31	0.31	A	G	A	GlazPoly	47.5
S1_7346476	1	7346476	0	1	1	G	T	G	Strict	47.5
S1_7438974	1	7438974	0	0.94	0.94	G	A	G	GlazPoly	47.5
S1_7439004	1	7439004	0.35	0	0.35	T	C		nonIDM	47.5
S1_7439120	1	7439120	0	0	0	G	C		nonIDM	47.5
S1_7439154	1	7439154	0	1	1	A	T	A	Strict	47.5
S1_7450200	1	7450200	0	0.25	0.25	C	T	C	GlazPoly	47.5
S1_7450645	1	7450645	0	1	1	C	T	C	Strict	47.5
S1_7450857	1	7450857	0	0.31	0.31	T	C	T	GlazPoly	47.5
S1_7451408	1	7451408	0.2	0	0.2	T	G		nonIDM	47.5
S1_7451420	1	7451420	0.1	0	0.1	A	C		nonIDM	47.5
S1_7451513	1	7451513	0.1	0	0.1	T	G		nonIDM	47.6
S1_7451530	1	7451530	0.1	0	0.1	C	G		nonIDM	47.6
S1_7457832	1	7457832	0.3	0.88	0.57	C	T		nonIDM	47.6
S1_7457868	1	7457868	0	0	0	A	G		nonIDM	47.6
S1_7460048	1	7460048	0.2	0	0.2	G	T		nonIDM	47.6
S1_7460073	1	7460073	0.4	1	0.6	A	C		nonIDM	47.6
S1_7460093	1	7460093	0.1	0	0.1	C	T		nonIDM	47.6
S1_7461314	1	7461314	0	0.25	0.25	A	G	A	GlazPoly	47.6
S1_7461335	1	7461335	0	1	1	G	A	G	Strict	47.6
S1_7461353	1	7461353	0.2	0	0.2	G	A		nonIDM	47.6
S1_7461672	1	7461672	0	1	1	A	T	A	Strict	47.6
S1_7461708	1	7461708	0	0.44	0.44	T	C	T	GlazPoly	47.6
S1_7461974	1	7461974	0.55	1	0.45	T	C		nonIDM	47.8
S1_7462004	1	7462004	0	0	0	G	A		nonIDM	47.8
S1_7462010	1	7462010	0.2	0	0.2	C	G		nonIDM	47.8
S1_7462070	1	7462070	0.2	0	0.2	A	T		nonIDM	47.7
[truncated: 119,020 more rows]

## Sheet: TableS02
Group	IID	Metric	Value	Region	NfieldPlots
GG	I9001554:250304732	PropMg	0.064885	GenomeWide
GG	I9000099:250304734	PropMg	0.0567398	GenomeWide
GG	I9100416:250304508	PropMg	0.0671088	GenomeWide
GG	TMEB1:250253593	PropMg	0.0147113	GenomeWide
GG	I9102324:250399839	PropMg	0.0730696	GenomeWide
GG	I9102322:250304504	PropMg	0.0150403	GenomeWide
GG	I9100459:250304509	PropMg	0.0508448	GenomeWide
GG	I9102325:250304510	PropMg	0.0151061	GenomeWide
GG	I9101730:250304520	PropMg	0.0733591	GenomeWide
GG	I9100420:250304512	PropMg	0.0158429	GenomeWide
GG	I9102312:250304506	PropMg	0.016093	GenomeWide
GG	I9100455:250304507	PropMg	0.0938865	GenomeWide
GG	I920397:250304486	PropMg	0.0581346	GenomeWide
GG	B9200061:250304482	PropMg	0.0277778	GenomeWide
GG	I920398:250304485	PropMg	0.0349097	GenomeWide
GG	I920342:250304487	PropMg	0.0169219	GenomeWide
GG	I920325:250304478	PropMg	0.0200668	GenomeWide
GG	I920326:250090768	PropMg	0.0168693	GenomeWide
GG	I920429:250304483	PropMg	0.0560951	GenomeWide
GG	I920110:250304479	PropMg	0.077912	GenomeWide
GG	I920067:250304490	PropMg	0.0152376	GenomeWide
GG	I920057:250304492	PropMg	0.0541213	GenomeWide
GG	I920427:250304489	PropMg	0.0150797	GenomeWide
GG	B9200068:250304480	PropMg	0.0157508	GenomeWide
GG	I930184:250304470	PropMg	0.091939	GenomeWide
GG	I930098:250304463	PropMg	0.0552397	GenomeWide
GG	I940239:250300602	PropMg	0.0609637	GenomeWide
GG	I940459:250300604	PropMg	0.0612006	GenomeWide
GG	I940561:250090825	PropMg	0.0655429	GenomeWide
GG	I940039:250300601	PropMg	0.0249487	GenomeWide
GG	I940270:250300606	PropMg	0.0168167	GenomeWide
GG	I940020:250300607	PropMg	0.023567	GenomeWide
GG	I940026:250300599	PropMg	0.0365809	GenomeWide
GG	I940237:250300605	PropMg	0.0451471	GenomeWide
GG	I940330:250090830	PropMg	0.0182378	GenomeWide
GG	I940263:250300608	PropMg	0.0589373	GenomeWide
GG	I940018:250300600	PropMg	0.0619638	GenomeWide
GG	I950211:250300573	PropMg	0.0461866	GenomeWide
GG	I950061:250300581	PropMg	0.0167904	GenomeWide
GG	I950058:250300572	PropMg	0.0367914	GenomeWide
GG	I950248:250300571	PropMg	0.037502	GenomeWide
GG	I950041:250300587	PropMg	0.0334623	GenomeWide
GG	I951038:250300590	PropMg	0.0279752	GenomeWide
GG	I950306:250300578	PropMg	0.0356992	GenomeWide
GG	I950269:250300574	PropMg	0.0796489	GenomeWide
GG	I950379:250300567	PropMg	0.0148429	GenomeWide
GG	I950971:250300591	PropMg	0.016343	GenomeWide
GG	I950645:250300568	PropMg	0.0613059	GenomeWide
GG	I950902:250300589	PropMg	0.0367783	GenomeWide
GG	I950279:250300585	PropMg	0.0710695	GenomeWide
GG	I950947:250300586	PropMg	0.0516606	GenomeWide
GG	I950063:250300569	PropMg	0.0261198	GenomeWide
GG	I950925:250090823	PropMg	0.0185668	GenomeWide
GG	I950528:250300570	PropMg	0.0583978	GenomeWide
GG	I950289:250300577	PropMg	0.0398179	GenomeWide
GG	I950104:250300592	PropMg	0.0568977	GenomeWide
GG	I960409:250300525	PropMg	0.0230012	GenomeWide
GG	I960603:250300536	PropMg	0.0562003	GenomeWide
GG	I961632:250300546	PropMg	0.0630428	GenomeWide
GG	I961089A:250300537	PropMg	0.0512527	GenomeWide
GG	I961630:250300545	PropMg	0.0359624	GenomeWide
GG	I961613:250090822	PropMg	0.0593715	GenomeWide
GG	I961317:250300534	PropMg	0.0587399	GenomeWide
GG	I960023:250300530	PropMg	0.0356861	GenomeWide
GG	I960596:250300528	PropMg	0.0201984	GenomeWide
GG	I960565:250300547	PropMg	0.0208827	GenomeWide
GG	I960557:250300551	PropMg	0.0154745	GenomeWide
GG	I960102:250300535	PropMg	0.0232381	GenomeWide
GG	I960304:250300522	PropMg	0.0347387	GenomeWide
GG	I960016:250300539	PropMg	0.0419759	GenomeWide
GG	I961439:250300549	PropMg	0.0703721	GenomeWide
GG	I960595:250300544	PropMg	0.0408048	GenomeWide
GG	I960590:250090800	PropMg	0.015685	GenomeWide
GG	I960619:250300526	PropMg	0.0221591	GenomeWide
GG	TMS961708:250107977	PropMg	0.0688326	GenomeWide
GG	I960035:250300532	PropMg	0.0177509	GenomeWide
GG	I960869:250300548	PropMg	0.0407127	GenomeWide
GG	I960986:250300524	PropMg	0.0226065	GenomeWide
GG	I961551:250300531	PropMg	0.0167377	GenomeWide
GG	I960062:250300527	PropMg	0.0165667	GenomeWide
GG	I961642:250300540	PropMg	0.0156324	GenomeWide
GG	I960963:250300550	PropMg	0.0142771	GenomeWide
GG	I960011:250300543	PropMg	0.0223301	GenomeWide
GG	I961427:250300542	PropMg	0.0419759	GenomeWide
GG	I960860:250300533	PropMg	0.0541871	GenomeWide
GG	I961569:250090799	PropMg	0.0690299	GenomeWide
GG	I961039:250090801	PropMg	0.0645166	GenomeWide
GG	I961087:250090813	PropMg	0.0581478	GenomeWide
GG	I960532:250090793	PropMg	0.0353176	GenomeWide
GG	I960249:250090818	PropMg	0.0507132	GenomeWide
GG	I8900250:250304521	PropMg	0.0501474	GenomeWide
GG	W4092:250304639	PropMg	0.078162	GenomeWide
GG	I8200058:250304538	PropMg	0.0778857	GenomeWide
GG	I30211:250304634	PropMg	0.0619506	GenomeWide
GG	I30555P3_2:250304647	PropMg	0.0782541	GenomeWide
GG	I30555:250254006	PropMg	0.0180667	GenomeWide
GG	I30040:250304627	PropMg	0.0151719	GenomeWide
GG	I8700052:250304530	PropMg	0.0375546	GenomeWide
GG	I60506:250304651	PropMg	0.0209222	GenomeWide
GG	I42025:250304628	PropMg	0.0600558	GenomeWide
GG	I8400353:250304535	PropMg	0.0774251	GenomeWide
GG	I40764:250090836	PropMg	0.0617796	GenomeWide
GG	TMS63397:250399764	PropMg	0.0303305	GenomeWide
GG	I8101635:250304540	PropMg	0.0335412	GenomeWide
GG	I91934:250304625	PropMg	0.0373704	GenomeWide
GG	O8400275:250304537	PropMg	0.0222512	GenomeWide
GG	I8900963:250304522	PropMg	0.0520422	GenomeWide
GG	I4_2_1425:250304632	PropMg	0.0762014	GenomeWide
GG	O71762:250304622	PropMg	0.0765961	GenomeWide
GG	W820249:250304637	PropMg	0.041068	GenomeWide
GG	I8902195:250304523	PropMg	0.0493184	GenomeWide
GG	I60142:250304629	PropMg	0.10319	GenomeWide
GG	I8500680:250304533	PropMg	0.0524633	GenomeWide
GG	I50395:250304623	PropMg	0.035765	GenomeWide
GG	I71673:250304633	PropMg	0.0317254	GenomeWide
GG	O8700813:250304531	PropMg	0.0501605	GenomeWide
GG	ICB5_10_80411_:250304646	PropMg	0.0475683	GenomeWide
GG	I30001:250304624	PropMg	0.0738065	GenomeWide
GG	I8802343:250304525	PropMg	0.0562398	GenomeWide
GG	O8500066:250304534	PropMg	0.0655692	GenomeWide
GG	TMEB6:250253598	PropMg	0.0146718	GenomeWide
GG	TMEB7:250253599	PropMg	0.0150139	GenomeWide
GG	TMEB8:250253600	PropMg	0.0154219	GenomeWide
GG	TMEB13:250253605	PropMg	0.0148429	GenomeWide
GG	TMEB239:250253789	PropMg	0.0177509	GenomeWide
GG	RB980113:250304475	PropMg	0.0192247	GenomeWide
GG	TMEB3:250253595	PropMg	0.0149087	GenomeWide
GG	TMEB12:250253604	PropMg	0.0152508	GenomeWide
GG	TMEB419:250253865	PropMg	0.019751	GenomeWide
GG	TMEB5:250253597	PropMg	0.0146981	GenomeWide
GG	TMEB11:250253603	PropMg	0.014435	GenomeWide
GG	TMEB4:250253596	PropMg	0.0144744	GenomeWide
GG	TMEB117:250304093	PropMg	0.015514	GenomeWide
GG	TMEB14:250253606	PropMg	0.0147113	GenomeWide
GG	TMEB279:250253802	PropMg	0.0163693	GenomeWide
GG	TMEB379:250253813	PropMg	0.0478315	GenomeWide
GG	TMEB282:250253803	PropMg	0.0250671	GenomeWide
GG	RB920099:250304498	PropMg	0.0197642	GenomeWide
GG	NR8212:250251147	PropMg	0.0567135	GenomeWide
GG	NR87184:250251131	PropMg	0.0605558	GenomeWide
GG	NR8949:250304645	PropMg	0.0573583	GenomeWide
GG	NR7734:250304644	PropMg	0.0624507	GenomeWide
GG	NR8082:250134459	PropMg	0.0655166	GenomeWide
GG	NR8421:250304641	PropMg	0.055424	GenomeWide
GG	NR89123:250304643	PropMg	0.0563714	GenomeWide
GG	I980406:250090810	PropMg	0.0267909	GenomeWide
GG	I980378:250090788	PropMg	0.0409232	GenomeWide
GG	SM1620_18:250304648	PropMg	0.0502921	GenomeWide
GG	I980581:250300439	PropMg	0.0572662	GenomeWide
GG	Z940153:250300614	PropMg	0.0256724	GenomeWide
GG	Z930151:250302826	PropMg	0.0213564	GenomeWide
GG	Z950415:250090829	PropMg	0.0674114	GenomeWide
GG	Z950432:250300597	PropMg	0.0668061	GenomeWide
GG	Z950680:250300580	PropMg	0.0376599	GenomeWide
GG	Z950826:250090828	PropMg	0.0239618	GenomeWide
GG	Z940394:250300615	PropMg	0.0499763	GenomeWide
GG	Z920250:250304497	PropMg	0.0173167	GenomeWide
GG	MM960093:250300560	PropMg	0.0737934	GenomeWide
GG	K950286:250300566	PropMg	0.0236723	GenomeWide
GG	I980510:250303662	PropMg	0.0153561	GenomeWide
GG	J920253:250304495	PropMg	0.0573583	GenomeWide
GG	J920230:250304494	PropMg	0.057253	GenomeWide
GG	I940006:250090826	PropMg	0.0764382	GenomeWide
GG	M940583:250304457	PropMg	0.032857	GenomeWide
GG	I930248:250304460	PropMg	0.0797805	GenomeWide
GG	I930266:250304458	PropMg	0.0287384	GenomeWide
GG	I930267:250304464	PropMg	0.0263698	GenomeWide
GG	I930272:250304467	PropMg	0.0156324	GenomeWide
GG	I930223:250304462	PropMg	0.0578583	GenomeWide
GG	I930134:250304468	PropMg	0.0243565	GenomeWide
GG	I930084:250304466	PropMg	0.0159745	GenomeWide
GG	I930114:250304469	PropMg	0.0650955	GenomeWide
GG	I930265:250302827	PropMg	0.0164219	GenomeWide
GG	I961165:250300541	PropMg	0.0350413	GenomeWide
GG	W940009:250300610	PropMg	0.0263567	GenomeWide
GG	W940017:250300613	PropMg	0.0405416	GenomeWide
GG	O920168:250304496	PropMg	0.0770567	GenomeWide
GG	I961556:250090808	PropMg	0.0524896	GenomeWide
GG	W940038:250300609	PropMg	0.0750039	GenomeWide
GG	I961431:250300538	PropMg	0.0159219	GenomeWide
GG	W940102:250300611	PropMg	0.0148297	GenomeWide
GG	W940727:250300612	PropMg	0.0612269	GenomeWide
GG	I980196:250300441	PropMg	0.0567398	GenomeWide
GG	I980002:250300438	PropMg	0.0755829	GenomeWide
GG	I974779:250300473	PropMg	0.0343571	GenomeWide
GG	I974766:250300468	PropMg	0.0666088	GenomeWide
GG	I982101:250090795	PropMg	0.0366467	GenomeWide
GG	I974763:250300463	PropMg	0.0792936	GenomeWide
GG	I980505:250301327	PropMg	0.0544897	GenomeWide
GG	I982132:250090792	PropMg	0.018251	GenomeWide
GG	I982226:250300440	PropMg	0.0418311	GenomeWide
GG	I972205:250301855	PropMg	0.078662	GenomeWide
GG	I9100153_3X_:250304514	PropMg	0.081478	GenomeWide
GG	I9100255_3X_:250304515	PropMg	0.0634244	GenomeWide
GG	I8400316_4X_:250304660	PropMg	0.0722143	GenomeWide
GG	I930602_4X_:250304474	PropMg	0.0779909	GenomeWide
GG	I8700018_42_4X_:250304532	PropMg	0.0696616	GenomeWide
GG	I91934_4X_:250304662	PropMg	0.0376994	GenomeWide
GG	I970296:250300469	PropMg	0.0328044	GenomeWide
GG	I970299:250300471	PropMg	0.0213038	GenomeWide
GG	I970425:250300465	PropMg	0.0797542	GenomeWide
GG	TMS970211:250399759	PropMg	0.0153034	GenomeWide
GG	I974580:250300467	PropMg	0.0652666	GenomeWide
GG	I970162:250090811	PropMg	0.0390021	GenomeWide
GG	I974013:250300470	PropMg	0.0497131	GenomeWide
GG	I970103:250090820	PropMg	0.039081	GenomeWide
GG	I971149:250300466	PropMg	0.0303963	GenomeWide
GG	I970335:250300464	PropMg	0.0297252	GenomeWide
GG	I970255:250300461	PropMg	0.0396863	GenomeWide
GG	I970286:250300462	PropMg	0.0195668	GenomeWide
GG	I971228:250300472	PropMg	0.0610427	GenomeWide
GG	I011813:250300321	PropMg	0.0159614	GenomeWide
GG	I010103:250300343	PropMg	0.0603979	GenomeWide
GG	I010265:250090781	PropMg	0.0213169	GenomeWide
GG	I010040:250300336	PropMg	0.0183431	GenomeWide
GG	I010046:250300307	PropMg	0.0453182	GenomeWide
GG	I010085:250300333	PropMg	0.0655561	GenomeWide
GG	I010034:250300320	PropMg	0.0562003	GenomeWide
GG	I010045:250300341	PropMg	0.0170272	GenomeWide
GG	I010098:250300331	PropMg	0.0161719	GenomeWide
GG	TMS010134:250134457	PropMg	0.0167904	GenomeWide
GG	I010131:250300316	PropMg	0.0303042	GenomeWide
GG	I010760:250090773	PropMg	0.0161456	GenomeWide
GG	I010903:250300322	PropMg	0.0381336	GenomeWide
GG	I010732:250300344	PropMg	0.0589768	GenomeWide
GG	I30572:250090764	PropMg	0.0783199	GenomeWide
GG	I010819:250300305	PropMg	0.0183168	GenomeWide
GG	I011115:250300311	PropMg	0.016264	GenomeWide
GG	I011206:250300325	PropMg	0.0319885	GenomeWide
GG	I011273:250300330	PropMg	0.0202511	GenomeWide
GG	I011659:250300327	PropMg	0.0480946	GenomeWide
GG	I011231:250300313	PropMg	0.0243039	GenomeWide
GG	I011635:250300301	PropMg	0.0298832	GenomeWide
GG	TMS011235:250367989	PropMg	0.0149218	GenomeWide
GG	I011560:250300317	PropMg	0.0160798	GenomeWide
GG	I011412:250302251	PropMg	0.068372	GenomeWide
GG	I011423:250300338	PropMg	0.0221985	GenomeWide
GG	I011371:250090769	PropMg	0.0692536	GenomeWide
GG	I011442:250300328	PropMg	0.0542134	GenomeWide
GG	I011646:250300329	PropMg	0.0196063	GenomeWide
GG	I011807:250300337	PropMg	0.0359493	GenomeWide
GG	I011735:250300319	PropMg	0.0539502	GenomeWide
GG	I011732:250300299	PropMg	0.0566082	GenomeWide
GG	I011760:250300324	PropMg	0.0294094	GenomeWide
GG	I011797:250090770	PropMg	0.0158561	GenomeWide
GG	I011802:250300302	PropMg	0.0573846	GenomeWide
GG	I011734:250090778	PropMg	0.0158693	GenomeWide
GG	TMS010090:250107946	PropMg	0.0410022	GenomeWide
GG	I010169:250300308	PropMg	0.0460945	GenomeWide
GG	I011097:250300304	PropMg	0.0715038	GenomeWide
GG	I010171:250300314	PropMg	0.0223828	GenomeWide
GG	I011335:250300345	PropMg	0.0368572	GenomeWide
GG	I011368:250300318	PropMg	0.0435681	GenomeWide
GG	I011331:250300340	PropMg	0.0183036	GenomeWide
GG	I011663:250300298	PropMg	0.0173167	GenomeWide
GG	I011413:250300332	PropMg	0.0321333	GenomeWide
GG	I011551:250399842	PropMg	0.0652929	GenomeWide
GG	I011404:250300300	PropMg	0.021659	GenomeWide
GG	I011296:250300297	PropMg	0.0165403	GenomeWide
GG	I011224:250300335	PropMg	0.0506474	GenomeWide
GG	TMS011731:250134498	PropMg	0.0575425	GenomeWide
GG	I000351:250300401	PropMg	0.0708195	GenomeWide
GG	I000203:250300407	PropMg	0.055595	GenomeWide
GG	I000214:250300403	PropMg	0.0442786	GenomeWide
GG	I000355:250300360	PropMg	0.0339492	GenomeWide
GG	I000350:250300359	PropMg	0.017172	GenomeWide
GG	I000378:250300406	PropMg	0.0150929	GenomeWide
GG	I000211:250300361	PropMg	0.0807279	GenomeWide
GG	I000061:250300410	PropMg	0.0433049	GenomeWide
GG	I000017:250300396	PropMg	0.070859	GenomeWide
GG	I000346:250300397	PropMg	0.0562266	GenomeWide
GG	I000345:250090783	PropMg	0.0713195	GenomeWide
GG	I000364:250300394	PropMg	0.0773199	GenomeWide
GG	I000354:250300408	PropMg	0.0224617	GenomeWide
GG	I000049:250300398	PropMg	0.0703853	GenomeWide
GG	I000338:250300400	PropMg	0.0717538	GenomeWide
GG	I000107:250300411	PropMg	0.0498184	GenomeWide
GG	I000222:250300409	PropMg	0.0341597	GenomeWide
GG	I000210:250300284	PropMg	0.0321333	GenomeWide
GG	I000070:250300358	PropMg	0.0227907	GenomeWide
GG	I000388:250300404	PropMg	0.0729775	GenomeWide
GG	I000101:250300399	PropMg	0.0412785	GenomeWide
GG	I991579:250300427	PropMg	0.0553845	GenomeWide
GG	I996016:250090791	PropMg	0.0183694	GenomeWide
GG	I990222:250300413	PropMg	0.0299226	GenomeWide
GG	I991590:250300425	PropMg	0.0754382	GenomeWide
GG	I990119:250300424	PropMg	0.0190931	GenomeWide
GG	I996076:250090776	PropMg	0.0203958	GenomeWide
GG	I990313:250090786	PropMg	0.0483578	GenomeWide
GG	I990240:250300431	PropMg	0.0367651	GenomeWide
GG	I990503:250090794	PropMg	0.0625822	GenomeWide
GG	TMS990558:250368046	PropMg	0.0272778	GenomeWide
GG	I991903:250300430	PropMg	0.06024	GenomeWide
GG	I997032:250090787	PropMg	0.0432523	GenomeWide
GG	I993073:250300423	PropMg	0.0715827	GenomeWide
GG	I992123:250300419	PropMg	0.0158956	GenomeWide
GG	I997533:250300428	PropMg	0.01933	GenomeWide
GG	I996012:250300416	PropMg	0.0178167	GenomeWide
GG	I990114:250300421	PropMg	0.035594	GenomeWide
GG	I990304:250300414	PropMg	0.0787278	GenomeWide
GG	I990111:250300412	PropMg	0.0757671	GenomeWide
GG	I990554:250300417	PropMg	0.0785962	GenomeWide
GG	I996017:250300415	PropMg	0.0162245	GenomeWide
GG	I996069:250300420	PropMg	0.0215011	GenomeWide
GG	I990411:250090802	PropMg	0.0348308	GenomeWide
GG	I990621:250300422	PropMg	0.0172246	GenomeWide
GG	I993151:250090777	PropMg	0.0158561	GenomeWide
GG	I991702:250090772	PropMg	0.0720827	GenomeWide
GG	I990564:250300426	PropMg	0.0356071	GenomeWide
GG	Z980190:250300460	PropMg	0.0376204	GenomeWide
GG	Z980137:250300459	PropMg	0.0260803	GenomeWide
GG	Z980139:250090803	PropMg	0.0661745	GenomeWide
GG	Z980135:250090816	PropMg	0.0486473	GenomeWide
GG	Z980144:250300457	PropMg	0.0552266	GenomeWide
GG	M980057:250090789	PropMg	0.0744118	GenomeWide
GG	M980004:250300454	PropMg	0.0356992	GenomeWide
GG	M980028:250300455	PropMg	0.022067	GenomeWide
GG	M980115:250300456	PropMg	0.0544502	GenomeWide
GG	M980040:250300453	PropMg	0.0295542	GenomeWide
GG	M980068:250300452	PropMg	0.0535291	GenomeWide
GG	MM971660:250300487	PropMg	0.051779	GenomeWide
GG	Z970474:250090812	PropMg	0.0599374	GenomeWide
GG	MM970016:250300474	PropMg	0.0587268	GenomeWide
GG	Z970002:250300521	PropMg	0.0533581	GenomeWide
GG	MM96JW1:250300559	PropMg	0.0205142	GenomeWide
GG	Z960058:250090817	PropMg	0.0198826	GenomeWide
GG	MM961871:250300561	PropMg	0.0568846	GenomeWide
GG	MM963665:250300558	PropMg	0.0482394	GenomeWide
GG	MM961751:250300552	PropMg	0.0163693	GenomeWide
GG	I960804:250300529	PropMg	0.0339492	GenomeWide
GG	MM964496:250300554	PropMg	0.0154087	GenomeWide
GG	MM965280:250300556	PropMg	0.0415153	GenomeWide
GG	96_1414:250254487	PropMg	0.0154877	GenomeWide
GG	Z950154:250300575	PropMg	0.0191721	GenomeWide
GG	MH950414:250134528	PropMg	0.0659903	GenomeWide
GG	I940066:250300603	PropMg	0.102045	GenomeWide
GG	I930007:250399843	PropMg	0.0732933	GenomeWide
GG	I930070:250304465	PropMg	0.0372388	GenomeWide
GG	TMS930330:250368042	PropMg	0.0179746	GenomeWide
GG	I920269:250304488	PropMg	0.0355808	GenomeWide
GG	I920457:250304484	PropMg	0.0166851	GenomeWide
GG	I920417:250303095	PropMg	0.0286989	GenomeWide
GG	I920211:250302962	PropMg	0.0167509	GenomeWide
GG	I920258:250304493	PropMg	0.083886	GenomeWide
GG	SM1799_21:250304731	PropMg	0.0755303	GenomeWide
GG	I930591_4X_:250304472	PropMg	0.0680167	GenomeWide
GG	BEN86052_4X_:250304661	PropMg	0.015264	GenomeWide
GG	I920057_4X_:250304501	PropMg	0.0543318	GenomeWide
GG	ISU_4X_:250304659	PropMg	0.015435	GenomeWide
GG	I9102325_4X_:250304518	PropMg	0.0159745	GenomeWide
GG	I920342_4X_:250304503	PropMg	0.0171851	GenomeWide
GG	I9101730_4X_:250304516	PropMg	0.0741618	GenomeWide
GG	I920067_4X_:250304502	PropMg	0.0153429	GenomeWide
GG	I9102316_4X_:250304517	PropMg	0.0151982	GenomeWide
GG	W820422:250304640	PropMg	0.0354492	GenomeWide
GG	I4_2_1443:250304626	PropMg	0.0369493	GenomeWide
GG	I90853:250090838	PropMg	0.0344492	GenomeWide
GG	W4080:250304636	PropMg	0.0779515	GenomeWide
GG	TMEB693:250304606	PropMg	0.0156982	GenomeWide
GG	TMEB778:250254008	PropMg	0.0605821	GenomeWide
GG	I020431:250300292	PropMg	0.0166456	GenomeWide
GG	I020091:250300286	PropMg	0.0772935	GenomeWide
GG	I020103:250300281	PropMg	0.0594242	GenomeWide
GG	I020105:250300277	PropMg	0.0425022	GenomeWide
GG	I020233:250300288	PropMg	0.0518843	GenomeWide
GG	I020452:250300289	PropMg	0.0215011	GenomeWide
GG	I020432:250300293	PropMg	0.0529107	GenomeWide
GG	I020129:250303091	PropMg	0.0300674	GenomeWide
GG	I020444:250300278	PropMg	0.0166982	GenomeWide
GG	I020388:250300280	PropMg	0.0156982	GenomeWide
GG	I020285:250300276	PropMg	0.0580425	GenomeWide
GG	I020133:250300275	PropMg	0.0397784	GenomeWide
GG	I020134:250300296	PropMg	0.0164877	GenomeWide
GG	I020131:250301245	PropMg	0.0510158	GenomeWide
GG	I020409:250300274	PropMg	0.0380546	GenomeWide
GG	I030075:250300232	PropMg	0.0155008	GenomeWide
GG	I030061:250300215	PropMg	0.0315675	GenomeWide
GG	I030177:250300271	PropMg	0.0424101	GenomeWide
GG	I030141:250300223	PropMg	0.019501	GenomeWide
GG	I030213:250300270	PropMg	0.0598058	GenomeWide
GG	I011086:250300303	PropMg	0.0556082	GenomeWide
GG	I991734:250300418	PropMg	0.0361861	GenomeWide
GG	I990543:250300429	PropMg	0.0193958	GenomeWide
GG	I950725:250300596	PropMg	0.0661219	GenomeWide
GG	I920053:250304481	PropMg	0.0497395	GenomeWide
GG	M000068:250304656	PropMg	0.0169351	GenomeWide
GG	M000004:250090775	PropMg	0.0717011	GenomeWide
GG	M000112:250090774	PropMg	0.0158298	GenomeWide
GG	M000142:250304655	PropMg	0.0564767	GenomeWide
GG	M000115C:250304653	PropMg	0.0709116	GenomeWide
GG	M000141:250304652	PropMg	0.0167114	GenomeWide
GG	M000146:250304727	PropMg	0.0714774	GenomeWide
GG	Z000120:250304736	PropMg	0.0402653	GenomeWide
GG	MM990302:250300437	PropMg	0.0161193	GenomeWide
GG	MM990214:250090815	PropMg	0.0476341	GenomeWide
GG	MM990477:250090809	PropMg	0.0170009	GenomeWide
GG	MM980163:250300450	PropMg	0.0550818	GenomeWide
GG	BEN86052:250304593	PropMg	0.0151192	GenomeWide
GG	I070520:250300165	PropMg	0.0188431	GenomeWide
GG	I070048:250300156	PropMg	0.0695168	GenomeWide
GG	I070258:250300140	PropMg	0.0553713	GenomeWide
GG	I070498:250399886	PropMg	0.0238302	GenomeWide
GG	I070835:250090834	PropMg	0.0176983	GenomeWide
GG	I071313:250300154	PropMg	0.078662	GenomeWide
GG	I070094:250300159	PropMg	0.0786357	GenomeWide
GG	I070632:250300155	PropMg	0.0305542	GenomeWide
GG	I070593:250300163	PropMg	0.0175272	GenomeWide
GG	I070749:250300162	PropMg	0.0187247	GenomeWide
GG	I070649:250300166	PropMg	0.0448181	GenomeWide
GG	I070620:250300161	PropMg	0.0478841	GenomeWide
GG	I070874:250300175	PropMg	0.0766751	GenomeWide
GG	I071295:250300158	PropMg	0.0242381	GenomeWide
GG	I070756:250300160	PropMg	0.0349229	GenomeWide
GG	I070675:250300167	PropMg	0.0494105	GenomeWide
GG	I070481:250300164	PropMg	0.0450155	GenomeWide
GG	I070134:250300151	PropMg	0.062727	GenomeWide
GG	I070751:250300152	PropMg	0.0182246	GenomeWide
GG	I070337:250300150	PropMg	0.0191063	GenomeWide
GG	I070299:250300168	PropMg	0.0572399	GenomeWide
GG	I070045:250300153	PropMg	0.0614111	GenomeWide
GG	I070974:250300149	PropMg	0.0172772	GenomeWide
GG	I070004:250300146	PropMg	0.0576609	GenomeWide
GG	I070752:250300143	PropMg	0.0172377	GenomeWide
GG	I071393:250300148	PropMg	0.0678588	GenomeWide
GG	I070539:250300145	PropMg	0.0263303	GenomeWide
GG	I070126:250300933	PropMg	0.0566477	GenomeWide
GG	I070576:250090831	PropMg	0.0179746	GenomeWide
GG	I070067:250300141	PropMg	0.0782936	GenomeWide
GG	I071378:250300142	PropMg	0.0789252	GenomeWide
GG	I070952:250300144	PropMg	0.0475551	GenomeWide
GG	I070553:250300173	PropMg	0.038752	GenomeWide
GG	I070910:250090835	PropMg	0.0173825	GenomeWide
GG	I070614:250300187	PropMg	0.0163166	GenomeWide
GG	I070374:250300157	PropMg	0.016764	GenomeWide
GG	I070808:250300176	PropMg	0.0443839	GenomeWide
GG	I050186:250090840	PropMg	0.0433707	GenomeWide
GG	I051601:250300201	PropMg	0.0303963	GenomeWide
GG	I050303:250300200	PropMg	0.0301332	GenomeWide
GG	I051631:250300199	PropMg	0.0596216	GenomeWide
GG	I051652:250090833	PropMg	0.0203958	GenomeWide
GG	I050311:250300193	PropMg	0.0190931	GenomeWide
GG	TMS051636:250134536	PropMg	0.0178167	GenomeWide
GG	I050286:250090839	PropMg	0.0570688	GenomeWide
GG	I051646:250300203	PropMg	0.0530291	GenomeWide
GG	I050998:250300197	PropMg	0.0175667	GenomeWide
GG	I051654:250300194	PropMg	0.0187378	GenomeWide
GG	I050099:250300198	PropMg	0.0160666	GenomeWide
GG	I051632:250300196	PropMg	0.0439234	GenomeWide
GG	I051658:250300195	PropMg	0.017672	GenomeWide
GG	I051274:250090837	PropMg	0.0818596	GenomeWide
GG	I051814:250300207	PropMg	0.0161456	GenomeWide
GG	I051626:250300213	PropMg	0.0175799	GenomeWide
GG	I050327:250300192	PropMg	0.0298042	GenomeWide
GG	I050231:250300209	PropMg	0.062648	GenomeWide
GG	I051740:250301195	PropMg	0.0171983	GenomeWide
GG	I051599:250300210	PropMg	0.026883	GenomeWide
GG	TMS051600:250399892	PropMg	0.0186852	GenomeWide
GG	I051553:250300205	PropMg	0.0353834	GenomeWide
GG	I050127:250300202	PropMg	0.0514632	GenomeWide
GG	I051625:250300211	PropMg	0.0174614	GenomeWide
GG	I050100:250300208	PropMg	0.0159877	GenomeWide
GG	I050128:250300204	PropMg	0.0173299	GenomeWide
GG	TMS050024:250107934	PropMg	0.0205932	GenomeWide
GG	I030256:250300226	PropMg	0.0281199	GenomeWide
GG	I030242:250090853	PropMg	0.0633586	GenomeWide
GG	I030042:250300216	PropMg	0.0296595	GenomeWide
GG	I030059:250300217	PropMg	0.0729512	GenomeWide
GG	I030055A:250300218	PropMg	0.0283041	GenomeWide
GG	I030305:250300224	PropMg	0.0485157	GenomeWide
GG	I030279:250300228	PropMg	0.0516869	GenomeWide
GG	I030264:250300234	PropMg	0.05924	GenomeWide
GG	I030007:250300231	PropMg	0.0568319	GenomeWide
GG	I030292:250300225	PropMg	0.0463314	GenomeWide
GG	I030275:250300230	PropMg	0.0813859	GenomeWide
GG	I030284:250300269	PropMg	0.0198826	GenomeWide
GG	I030030:250300266	PropMg	0.0643323	GenomeWide
GG	I030265:250090846	PropMg	0.0541607	GenomeWide
GG	I030013:250300268	PropMg	0.0251066	GenomeWide
GG	I030060:250303093	PropMg	0.027462	GenomeWide
GG	I030276:250300219	PropMg	0.0523843	GenomeWide
GG	I030028:250300229	PropMg	0.0590031	GenomeWide
GG	I030060A:250300227	PropMg	0.0453708	GenomeWide
GG	I030224:250090849	PropMg	0.0630954	GenomeWide
GG	I030254:250300272	PropMg	0.0291463	GenomeWide
GG	I030057:250090841	PropMg	0.0176325	GenomeWide
GG	I030006A:250300221	PropMg	0.0751882	GenomeWide
GG	I030273:250300220	PropMg	0.0663061	GenomeWide
GG	I030015:250300214	PropMg	0.0215011	GenomeWide
GG	I030006B:250300222	PropMg	0.0281331	GenomeWide
GG	I020516:250300291	PropMg	0.0616085	GenomeWide
GG	I020100:250300294	PropMg	0.0538976	GenomeWide
GG	I020510:250399884	PropMg	0.0734907	GenomeWide
GG	I020509:250300279	PropMg	0.0718722	GenomeWide
GG	I020527:250300287	PropMg	0.0852676	GenomeWide
GG	I020540:250300283	PropMg	0.0536607	GenomeWide
GG	I020514:250300273	PropMg	0.0435681	GenomeWide
GG	I020588:250300290	PropMg	0.0644902	GenomeWide
GG	I020570:250300282	PropMg	0.0642929	GenomeWide
GG	I011752:250300342	PropMg	0.0164219	GenomeWide
GG	I011417:250300334	PropMg	0.0581083	GenomeWide
GG	I010606:250300312	PropMg	0.0466998	GenomeWide
GG	I011811:250300309	PropMg	0.0153034	GenomeWide
GG	I010615:250300326	PropMg	0.0493052	GenomeWide
GG	I010622:250300339	PropMg	0.0414101	GenomeWide
GG	I010728:250300315	PropMg	0.0191063	GenomeWide
GG	I010536:250300310	PropMg	0.0156719	GenomeWide
GG	I010753:250300306	PropMg	0.0406469	GenomeWide
GG	MM013004:250300354	PropMg	0.0246724	GenomeWide
GG	MM011196:250300357	PropMg	0.0144744	GenomeWide
GG	MM010540:250300356	PropMg	0.0179352	GenomeWide
GG	MM011161:250300355	PropMg	0.0165798	GenomeWide
GG	Z010053:250300352	PropMg	0.020159	GenomeWide
GG	Z010055:250300350	PropMg	0.0358966	GenomeWide
GG	Z010087:250300349	PropMg	0.0153429	GenomeWide
GG	Z010130:250300353	PropMg	0.0677667	GenomeWide
GG	Z010153:250300346	PropMg	0.0541081	GenomeWide
GG	Z010116:250300347	PropMg	0.02083	GenomeWide
GG	Z010071:250300351	PropMg	0.0609243	GenomeWide
GG	Z010125:250300348	PropMg	0.0591742	GenomeWide
GG	I000028:250300405	PropMg	0.0322122	GenomeWide
GG	I000342:250300393	PropMg	0.032778	GenomeWide
GG	I000093:250300402	PropMg	0.0284752	GenomeWide
GG	M000175:250304657	PropMg	0.0617138	GenomeWide
GG	M000044:250090784	PropMg	0.0534765	GenomeWide
GG	M000015:250304654	PropMg	0.0717538	GenomeWide
GG	M000063:250090779	PropMg	0.0579767	GenomeWide
GG	Z000012:250090782	PropMg	0.0646481	GenomeWide
GG	Z000200:250304737	PropMg	0.0288041	GenomeWide
GG	Z000104:250090785	PropMg	0.0160403	GenomeWide
GG	Z000156:250090771	PropMg	0.0207906	GenomeWide
GG	I997578:250300432	PropMg	0.0158035	GenomeWide
GG	MM990268:250300436	PropMg	0.0171851	GenomeWide
GG	MM990276:250090819	PropMg	0.0167509	GenomeWide
GG	Z990207:250300435	PropMg	0.0155798	GenomeWide
GG	Z980098:250300458	PropMg	0.0763066	GenomeWide
GG	MM980931:250300442	PropMg	0.0717275	GenomeWide
GG	MM985136:250300448	PropMg	0.0389626	GenomeWide
GG	MM980299:250300451	PropMg	0.0363045	GenomeWide
GG	MM980604:250300446	PropMg	0.0285673	GenomeWide
GG	MM980747:250300443	PropMg	0.0331728	GenomeWide
GG	MM981020:250300444	PropMg	0.034686	GenomeWide
GG	MM980034:250300447	PropMg	0.0660693	GenomeWide
GG	MM983437:250300445	PropMg	0.034186	GenomeWide
GG	MM980057:250300449	PropMg	0.0740828	GenomeWide
GG	MM980471:250090845	PropMg	0.044226	GenomeWide
GG	I970219:250090796	PropMg	0.0417259	GenomeWide
GG	I970290:250090804	PropMg	0.0601874	GenomeWide
GG	I974045:250090797	PropMg	0.0314227	GenomeWide
GG	MM972480:250300475	PropMg	0.0567398	GenomeWide
GG	MM971405:250090821	PropMg	0.0588189	GenomeWide
GG	MM971750:250300485	PropMg	0.0433312	GenomeWide
GG	MM970287:250300488	PropMg	0.0258303	GenomeWide
GG	MM971141:250300478	PropMg	0.0507395	GenomeWide
GG	MM970092:250300476	PropMg	0.0158166	GenomeWide
GG	MM970646:250300486	PropMg	0.0541871	GenomeWide
GG	MM970806:250300484	PropMg	0.0543844	GenomeWide
GG	MM970227:250090807	PropMg	0.0609901	GenomeWide
GG	MM972961:250090850	PropMg	0.0405021	GenomeWide
GG	MM972346:250300479	PropMg	0.0174351	GenomeWide
GG	MM972320:250300483	PropMg	0.038831	GenomeWide
GG	MM970043:250300482	PropMg	0.0544897	GenomeWide
GG	MM970134:250300480	PropMg	0.0384494	GenomeWide
GG	MM972220:250300481	PropMg	0.0426865	GenomeWide
GG	MM971909:250090798	PropMg	0.0510948	GenomeWide
GG	MM974580:250300520	PropMg	0.0411732	GenomeWide
GG	MM971899:250090806	PropMg	0.0163166	GenomeWide
GG	MM97JW2:250300477	PropMg	0.0164877	GenomeWide
GG	I960129:250090814	PropMg	0.0239749	GenomeWide
GG	MM960259:250300557	PropMg	0.0569898	GenomeWide
GG	MM965055:250090843	PropMg	0.0160666	GenomeWide
GG	MM963635:250300563	PropMg	0.0633981	GenomeWide
GG	MM967204_DRC_:250300565	PropMg	0.0166061	GenomeWide
GG	MM961669:250090847	PropMg	0.0239355	GenomeWide
GG	MM961839:250399876	PropMg	0.0324359	GenomeWide
GG	MM966583:250300553	PropMg	0.017593	GenomeWide
GG	MM964019:250090855	PropMg	0.076333	GenomeWide
GG	MM964500:250300562	PropMg	0.0175799	GenomeWide
GG	MM960287:250300555	PropMg	0.0159745	GenomeWide
GG	I950442:250300588	PropMg	0.0393179	GenomeWide
GG	I950961:250300584	PropMg	0.0647534	GenomeWide
GG	I950594:250300583	PropMg	0.0494368	GenomeWide
GG	I950286:250300594	PropMg	0.0455287	GenomeWide
GG	I950986:250300582	PropMg	0.0260014	GenomeWide
GG	95NA_00063:250300579	PropMg	0.0252908	GenomeWide
GG	BA95070:250300598	PropMg	0.0924786	GenomeWide
GG	K930061:250304471	PropMg	0.0278041	GenomeWide
GG	CH92108:250090858	PropMg	0.0776357	GenomeWide
GG	KIBANDAMENO:250254266	PropMg	0.016843	GenomeWide
GG	AGBELIFIA:250304616	PropMg	0.0213827	GenomeWide
GG	SIMONYE:250254432	PropMg	0.0175141	GenomeWide
GG	RB98509:250304477	PropMg	0.0199089	GenomeWide
GG	TMEB296:250253808	PropMg	0.0164351	GenomeWide
GG	DOKUNBAHKYE:250304546	PropMg	0.0541476	GenomeWide
GG	NASE8:250304588	PropMg	0.0802279	GenomeWide
GG	MV990395:250300434	PropMg	0.0326859	GenomeWide
GG	KIZIMBANI:250304603	PropMg	0.017922	GenomeWide
GG	UKG41_9:250304600	PropMg	0.0176457	GenomeWide
GG	TMEB1309:250254237	PropMg	0.0176457	GenomeWide
GG	KALESO:250304590	PropMg	0.12048	GenomeWide
GG	KARAMA:250304596	PropMg	0.0163561	GenomeWide
GG	BAHKYEHEMAA:250304601	PropMg	0.0341202	GenomeWide
GG	L9_304_25:250253934	PropMg	0.017593	GenomeWide
GG	SLICASS6:250304591	PropMg	0.0546213	GenomeWide
GG	SLICASS4:250304551	PropMg	0.0692273	GenomeWide
GG	TMEB1349:250254259	PropMg	0.0473314	GenomeWide
GG	TMEB1346:250254256	PropMg	0.0353834	GenomeWide
GG	TMEB64:250253637	PropMg	0.015764	GenomeWide
GG	TMEB1341:250254253	PropMg	0.0703721	GenomeWide
GG	MKONDEZI:250253662	PropMg	0.0205142	GenomeWide
GG	TMEB1788:250254431	PropMg	0.0674114	GenomeWide
GG	KIBANDAMENO_WHITE:250304552	PropMg	0.0761356	GenomeWide
GG	TMEB1332:250254245	PropMg	0.0638323	GenomeWide
GG	TMEB145:250253685	PropMg	0.022317	GenomeWide
GG	TMEB1347:250254257	PropMg	0.0653324	GenomeWide
GG	TMEB2:250253594	PropMg	0.0166719	GenomeWide
GG	ESAMBAHKYE:250304547	PropMg	0.0206985	GenomeWide
GG	BANGWEULU:250304615	PropMg	0.0159877	GenomeWide
GG	TMEB1334:250254247	PropMg	0.0813201	GenomeWide
GG	TMEB590:250253931	PropMg	0.0774909	GenomeWide
GG	SLICASS5:250304614	PropMg	0.0707932	GenomeWide
GG	SL861:250304610	PropMg	0.0690168	GenomeWide
GG	NASE12:250304608	PropMg	0.0650429	GenomeWide
GG	TMEB1776:250254426	PropMg	0.0174088	GenomeWide
GG	TMEB594:250253935	PropMg	0.0172509	GenomeWide
GG	KIBAHA:250304598	PropMg	0.017843	GenomeWide
GG	TMEB1310:250304612	PropMg	0.0668193	GenomeWide
GG	TMEB388:250253850	PropMg	0.0733591	GenomeWide
GG	TMEB1336:250304542	PropMg	0.0657666	GenomeWide
GG	I30555_7:250304630	PropMg	0.0777278	GenomeWide
GG	I83672:250304733	PropMg	0.0601611	GenomeWide
GG	I8801504:250304527	PropMg	0.0793068	GenomeWide
GG	O8800119:250304528	PropMg	0.0196721	GenomeWide
GG	O8800279:250304526	PropMg	0.0663982	GenomeWide
GG	O8400401:250304536	PropMg	0.0405942	GenomeWide
GG	I9100090_4X_:250304519	PropMg	0.0805042	GenomeWide
GG	I920509_4X_:250304500	PropMg	0.0790436	GenomeWide
GG	I930614_4X_:250304473	PropMg	0.0765303	GenomeWide
GG	I061348:250300191	PropMg	0.0176588	GenomeWide
GG	I020093:250300285	PropMg	0.0491605	GenomeWide
GG	I061679:250300190	PropMg	0.0648718	GenomeWide
GG	I061101:250300189	PropMg	0.0173167	GenomeWide
GG	I061365:250300182	PropMg	0.0428707	GenomeWide
GG	I061766:250300180	PropMg	0.0161456	GenomeWide
GG	I070999:250300169	PropMg	0.0653587	GenomeWide
GG	I060889:250300179	PropMg	0.0186062	GenomeWide
GG	I070824:250300170	PropMg	0.0260803	GenomeWide
GG	I070628:250300171	PropMg	0.0195405	GenomeWide
GG	I061635:250300186	PropMg	0.0422785	GenomeWide
GG	I061404:250300188	PropMg	0.0482657	GenomeWide
GG	I58308:250304631	PropMg	0.0759777	GenomeWide
GG	I061856:250300184	PropMg	0.0223959	GenomeWide
GG	I061744:250300178	PropMg	0.0691615	GenomeWide
GG	I061155:250300183	PropMg	0.0421733	GenomeWide
GG	I070962:250300172	PropMg	0.0295147	GenomeWide
GG	I070525:250300174	PropMg	0.0490421	GenomeWide
GG	I063046:250300177	PropMg	0.0725433	GenomeWide
GG	I062630:250300181	PropMg	0.0790831	GenomeWide
GG	I062052:250300185	PropMg	0.0229354	GenomeWide
GG	I030555:250300233	PropMg	0.052108	GenomeWide
GG	I970353:250090805	PropMg	0.0562924	GenomeWide
GG	I960325:250090790	PropMg	0.0273172	GenomeWide
GG	MM968676:250090857	PropMg	0.0343702	GenomeWide
GG	MM968876:250300564	PropMg	0.0348834	GenomeWide
GG	NR930199:250304476	PropMg	0.054766	GenomeWide
GG	B9100462:250304505	PropMg	0.0155798	GenomeWide
GG	B9100455:250304511	PropMg	0.0152376	GenomeWide
GG	I9102324_4X_:250304513	PropMg	0.0296989	GenomeWide
GG	I8900003:250304524	PropMg	0.046963	GenomeWide
GG	I8800695:250304529	PropMg	0.0577136	GenomeWide
GG	I8100045:250304539	PropMg	0.0336991	GenomeWide
GG	I083568:250099295	PropMg	0.0520554	GenomeWide
GG	I083426:250099314	PropMg	0.0178036	GenomeWide
GG	I083718:250099297	PropMg	0.0725301	GenomeWide
GG	I082425:250399888	PropMg	0.0429759	GenomeWide
GG	I061673:250304668	PropMg	0.0197642	GenomeWide
GG	I061911:250304669	PropMg	0.0495947	GenomeWide
GG	I070753:250304670	PropMg	0.017843	GenomeWide
GG	I062231:250304671	PropMg	0.0173693	GenomeWide
GG	I070736:250304672	PropMg	0.0482394	GenomeWide
GG	I061577:250304673	PropMg	0.024646	GenomeWide
GG	I083565:250099307	PropMg	0.0384494	GenomeWide
GG	I083535:250099291	PropMg	0.0435023	GenomeWide
GG	I082432:250099294	PropMg	0.0633718	GenomeWide
GG	I083739:250099305	PropMg	0.0746223	GenomeWide
GG	I082393:250099312	PropMg	0.0367783	GenomeWide
GG	I083774:250099296	PropMg	0.017593	GenomeWide
GG	I070536:250304711	PropMg	0.023146	GenomeWide
GG	I070683:250304712	PropMg	0.0452129	GenomeWide
GG	I062116:250304713	PropMg	0.0532923	GenomeWide
GG	I070670:250304714	PropMg	0.032357	GenomeWide
GG	I062021:250304715	PropMg	0.0547529	GenomeWide
GG	I061640:250304716	PropMg	0.064806	GenomeWide
GG	I083043:250099290	PropMg	0.0220275	GenomeWide
GG	I082189:250099301	PropMg	0.0572267	GenomeWide
GG	I082159:250099306	PropMg	0.0618717	GenomeWide
GG	I083580:250099289	PropMg	0.0517922	GenomeWide
GG	I083389:250099303	PropMg	0.0714643	GenomeWide
GG	I083196:250099293	PropMg	0.0211722	GenomeWide
GG	I082418:250099302	PropMg	0.0186589	GenomeWide
GG	I082993:250099308	PropMg	0.0529896	GenomeWide
GG	I083579:250099300	PropMg	0.0619506	GenomeWide
GG	I070557:250304728	PropMg	0.0173957	GenomeWide
GG	TME204:250329653	PropMg	0.020159	GenomeWide
GG	TMEB237:250253788	PropMg	0.031199	GenomeWide
GG	TMEB199:250253760	PropMg	0.0209222	GenomeWide
GG	TMEB785:250254011	PropMg	0.0597795	GenomeWide
GG	TMEB207:250253766	PropMg	0.0173957	GenomeWide
GG	MM000142:250302433	PropMg	0.0561345	GenomeWide
GG	TMS050741:250107950	PropMg	0.0298832	GenomeWide
GG	TMS051662:250399909	PropMg	0.019001	GenomeWide
GG	TMS051570:250107964	PropMg	0.0220933	GenomeWide
GG	TMS050125:250107971	PropMg	0.0787541	GenomeWide
GG	TMEB1775:250254425	PropMg	0.0645034	GenomeWide
GG	SILIRA:250254229	PropMg	0.0707142	GenomeWide
GG	TMEB539:250253919	PropMg	0.0216459	GenomeWide
GG	TMEB9:250253601	PropMg	0.0149087	GenomeWide
GG	TMS050473:250134585	PropMg	0.0292384	GenomeWide
GG	SLICASS3:250304550	PropMg	0.0172641	GenomeWide
GG	NANCHINYAYA:250254381	PropMg	0.017172	GenomeWide
GG	NR010004:250107855	PropMg	0.057003	GenomeWide
GG	MAHUNGU:250304602	PropMg	0.0476078	GenomeWide
GG	I070703:250099144	PropMg	0.0465946	GenomeWide
GG	I082636:250099311	PropMg	0.048371	GenomeWide
GG	I090523:250099191	PropMg	0.0741618	GenomeWide
GG	I090581:250099170	PropMg	0.0179352	GenomeWide
GG	I090521:250099172	PropMg	0.0578451	GenomeWide
GG	I090576:250099182	PropMg	0.0588978	GenomeWide
GG	I090574:250099175	PropMg	0.0175536	GenomeWide
GG	I090516:250099187	PropMg	0.112664	GenomeWide
GG	I090522:250099176	PropMg	0.073517	GenomeWide
GG	I090498:250399887	PropMg	0.0737934	GenomeWide
GG	I090590:250099196	PropMg	0.0406337	GenomeWide
GG	I090504:250099192	PropMg	0.0455287	GenomeWide
GG	I090546:250099169	PropMg	0.072767	GenomeWide
GG	I090510:250099174	PropMg	0.0695037	GenomeWide
GG	I090537:250099180	PropMg	0.057253	GenomeWide
GG	I090454:250099188	PropMg	0.0589373	GenomeWide
GG	I090508:250099168	PropMg	0.0951761	GenomeWide
GG	I090564:250099179	PropMg	0.0299489	GenomeWide
GG	I090520:250099183	PropMg	0.0924786	GenomeWide
GG	I090486:250099173	PropMg	0.0167509	GenomeWide
GG	I090509:250099171	PropMg	0.0383704	GenomeWide
GG	I102708:250099035	PropMg	0.0208037	GenomeWide
GG	I102721:250099096	PropMg	0.0596216	GenomeWide
GG	I102480:250099051	PropMg	0.0549897	GenomeWide
GG	I102731:250099032	PropMg	0.0889126	GenomeWide
GG	I102612:250099090	PropMg	0.0288305	GenomeWide
GG	I102427:250099076	PropMg	0.0349097	GenomeWide
GG	I102289:250099039	PropMg	0.0220012	GenomeWide
GG	I102910:250099020	PropMg	0.018422	GenomeWide
GG	I102535:250399885	PropMg	0.0212906	GenomeWide
GG	I083724:250099304	PropMg	0.0643587	GenomeWide
GG	TMEB119:250253667	PropMg	0.0195537	GenomeWide
LG	TMEB1:250253593	PropMg	0.0147113	GenomeWide
LG	TMEB2:250253594	PropMg	0.0166719	GenomeWide
LG	TMEB3:250253595	PropMg	0.0149087	GenomeWide
LG	TMEB4:250253596	PropMg	0.0144744	GenomeWide
LG	TMEB5:250253597	PropMg	0.0146981	GenomeWide
LG	TMEB6:250253598	PropMg	0.0146718	GenomeWide
LG	TMEB7:250253599	PropMg	0.0150139	GenomeWide
LG	TMEB8:250253600	PropMg	0.0154219	GenomeWide
LG	TMEB9:250253601	PropMg	0.0149087	GenomeWide
LG	TMEB10:250253602	PropMg	0.015185	GenomeWide
LG	TMEB11:250253603	PropMg	0.014435	GenomeWide
LG	I30572:250090764	PropMg	0.0783199	GenomeWide
LG	TMEB12:250253604	PropMg	0.0152508	GenomeWide
LG	TMEB13:250253605	PropMg	0.0148429	GenomeWide
LG	TMEB14:250253606	PropMg	0.0147113	GenomeWide
LG	TMEB15:250253607	PropMg	0.0168035	GenomeWide
LG	TMEB17:250253608	PropMg	0.0156587	GenomeWide
LG	TMEB19:250253610	PropMg	0.0174483	GenomeWide
LG	TMEB20:250253611	PropMg	0.0165798	GenomeWide
LG	TMEB21:250253612	PropMg	0.021738	GenomeWide
LG	TMEB23:250253613	PropMg	0.0155403	GenomeWide
LG	TMEB24:250253614	PropMg	0.0151982	GenomeWide
LG	TMEB25:250253615	PropMg	0.0170667	GenomeWide
LG	TMEB26:250253616	PropMg	0.0158298	GenomeWide
LG	TMEB28:250253617	PropMg	0.0196326	GenomeWide
LG	TMEB30:250253618	PropMg	0.0277778	GenomeWide
LG	TMEB31:250253619	PropMg	0.0214748	GenomeWide
LG	TMEB33:250253620	PropMg	0.0220275	GenomeWide
LG	TMEB34:250253621	PropMg	0.015264	GenomeWide
LG	TMEB35:250253622	PropMg	0.0145402	GenomeWide
LG	TMEB37:250253623	PropMg	0.0161324	GenomeWide
LG	TMEB43:250253624	PropMg	0.0154877	GenomeWide
LG	TMEB47:250253625	PropMg	0.0149745	GenomeWide
LG	TMEB49:250253627	PropMg	0.0775699	GenomeWide
LG	TMEB51:250253628	PropMg	0.0160008	GenomeWide
LG	TMEB52:250253629	PropMg	0.0153692	GenomeWide
LG	TMEB55:250253630	PropMg	0.0172377	GenomeWide
LG	TMEB56:250253631	PropMg	0.0158298	GenomeWide
LG	TMEB57:250253632	PropMg	0.0157903	GenomeWide
LG	TMEB59:250253633	PropMg	0.0155008	GenomeWide
LG	TMEB60:250253634	PropMg	0.0168825	GenomeWide
LG	TMEB62:250253635	PropMg	0.016264	GenomeWide
LG	TMEB63:250253636	PropMg	0.0156719	GenomeWide
LG	TMEB64:250253637	PropMg	0.015764	GenomeWide
LG	TMEB67:250253638	PropMg	0.0150929	GenomeWide
LG	TMEB69:250253639	PropMg	0.0153298	GenomeWide
LG	TMEB72:250253640	PropMg	0.0152113	GenomeWide
LG	TMEB75:250253641	PropMg	0.0158298	GenomeWide
LG	TMEB78:250253644	PropMg	0.0160666	GenomeWide
LG	TMEB81:250253645	PropMg	0.0157508	GenomeWide
LG	TMEB84:250253647	PropMg	0.0232117	GenomeWide
LG	TMEB86:250253648	PropMg	0.0157114	GenomeWide
LG	TMEB90:250253649	PropMg	0.0152245	GenomeWide
LG	TMEB91:250253650	PropMg	0.015435	GenomeWide
LG	TMEB93:250253651	PropMg	0.0155666	GenomeWide
LG	TMEB95:250253652	PropMg	0.0153824	GenomeWide
LG	TMEB96:250253653	PropMg	0.0157114	GenomeWide
LG	TMEB98:250253654	PropMg	0.0175141	GenomeWide
LG	TMEB99:250253655	PropMg	0.0605427	GenomeWide
LG	TMEB101:250253656	PropMg	0.0156587	GenomeWide
LG	TMEB102:250253657	PropMg	0.0168956	GenomeWide
LG	TMEB103:250253658	PropMg	0.0152771	GenomeWide
LG	TMEB104:250253659	PropMg	0.0170141	GenomeWide
LG	TMEB107:250253660	PropMg	0.0153298	GenomeWide
LG	TMEB108:250253661	PropMg	0.0172114	GenomeWide
LG	TMEB109:250253663	PropMg	0.0285936	GenomeWide
LG	TMEB111:250253664	PropMg	0.0156324	GenomeWide
LG	TMEB117:250304093	PropMg	0.015514	GenomeWide
LG	TMEB119:250253667	PropMg	0.0195537	GenomeWide
LG	TMEB120:250253668	PropMg	0.0279225	GenomeWide
LG	TMEB121:250253669	PropMg	0.0168562	GenomeWide
LG	TMEB123:250253670	PropMg	0.0206721	GenomeWide
LG	TMEB126:250253671	PropMg	0.0672667	GenomeWide
LG	TMEB127:250253672	PropMg	0.0692668	GenomeWide
LG	TMEB128:250253673	PropMg	0.0688326	GenomeWide
LG	TMEB130:250253674	PropMg	0.043397	GenomeWide
LG	TMEB131:250253675	PropMg	0.0186589	GenomeWide
LG	TMEB132:250253676	PropMg	0.0440023	GenomeWide
LG	TMEB133:250253677	PropMg	0.0788463	GenomeWide
LG	TMEB134:250253678	PropMg	0.0691221	GenomeWide
LG	TMEB135:250253680	PropMg	0.0434891	GenomeWide
LG	TMEB136:250253681	PropMg	0.0438049	GenomeWide
LG	TMEB137:250253682	PropMg	0.0426733	GenomeWide
LG	TMEB138:250253683	PropMg	0.0165798	GenomeWide
LG	TMEB139:250253684	PropMg	0.0435023	GenomeWide
LG	TMEB145:250253685	PropMg	0.022317	GenomeWide
LG	TMEB146:250253686	PropMg	0.0250145	GenomeWide
LG	TMEB147:250253687	PropMg	0.0395416	GenomeWide
LG	TMEB148:250253719	PropMg	0.0724643	GenomeWide
LG	TMEB150:250253721	PropMg	0.0171325	GenomeWide
LG	TMEB151:250253722	PropMg	0.0572135	GenomeWide
LG	TMEB152:250253723	PropMg	0.0285278	GenomeWide
LG	TMEB153:250253724	PropMg	0.0470814	GenomeWide
LG	TMEB154:250253725	PropMg	0.0466077	GenomeWide
LG	TMEB156:250253726	PropMg	0.0436207	GenomeWide
LG	TMEB158:250253729	PropMg	0.0901232	GenomeWide
LG	TMEB159:250253730	PropMg	0.0907021	GenomeWide
LG	TMEB160:250253731	PropMg	0.0247776	GenomeWide
LG	TMEB161:250253732	PropMg	0.0565424	GenomeWide
LG	TMEB162:250253733	PropMg	0.0451076	GenomeWide
LG	TMEB164:250253734	PropMg	0.0729249	GenomeWide
LG	TMEB165:250253735	PropMg	0.0477657	GenomeWide
LG	TMEB168:250253737	PropMg	0.0539765	GenomeWide
LG	TMEB169:250253738	PropMg	0.0685168	GenomeWide
LG	TMEB170:250253739	PropMg	0.0553187	GenomeWide
LG	TMEB171:250253740	PropMg	0.0612532	GenomeWide
LG	TMEB172:250253741	PropMg	0.0188957	GenomeWide
LG	TMEB173:250253742	PropMg	0.0174878	GenomeWide
LG	TMEB174:250253743	PropMg	0.0460945	GenomeWide
LG	TMEB175:250253744	PropMg	0.0457919	GenomeWide
LG	TMEB176:250253745	PropMg	0.0246329	GenomeWide
LG	TMEB179:250253747	PropMg	0.0553055	GenomeWide
LG	TMEB182:250253748	PropMg	0.0681878	GenomeWide
LG	TMEB183:250253749	PropMg	0.0321464	GenomeWide
LG	TMEB185:250253750	PropMg	0.0331465	GenomeWide
LG	TMEB186:250253751	PropMg	0.0518975	GenomeWide
LG	TMEB187:250253752	PropMg	0.0451997	GenomeWide
LG	TMEB188:250253753	PropMg	0.0779252	GenomeWide
LG	TMEB189:250253754	PropMg	0.0781752	GenomeWide
LG	TMEB191:250253755	PropMg	0.0489763	GenomeWide
LG	TMEB192:250253756	PropMg	0.0364361	GenomeWide
LG	TMEB193:250253757	PropMg	0.0371072	GenomeWide
LG	TMEB197:250253758	PropMg	0.0205011	GenomeWide
LG	TMEB198:250253759	PropMg	0.0316069	GenomeWide
LG	TMEB199:250253760	PropMg	0.0209222	GenomeWide
LG	TMEB202:250253762	PropMg	0.0233433	GenomeWide
LG	TMEB203:250253763	PropMg	0.0154087	GenomeWide
LG	TME204:250329653	PropMg	0.020159	GenomeWide
LG	TMEB205:250253764	PropMg	0.0447918	GenomeWide
LG	TMEB206:250253765	PropMg	0.0438313	GenomeWide
LG	TMEB207:250253766	PropMg	0.0173957	GenomeWide
LG	TMEB208:250253767	PropMg	0.0186852	GenomeWide
LG	TMEB209:250253768	PropMg	0.0777541	GenomeWide
LG	TMEB210:250253769	PropMg	0.0290278	GenomeWide
LG	TMEB211:250253770	PropMg	0.0902679	GenomeWide
LG	TMEB212:250253771	PropMg	0.0602926	GenomeWide
LG	TMEB213:250253772	PropMg	0.0183168	GenomeWide
LG	TMEB215:250253774	PropMg	0.018922	GenomeWide
LG	TMEB216:250253775	PropMg	0.0593452	GenomeWide
LG	TMEB219:250253776	PropMg	0.0582925	GenomeWide
LG	TMEB220:250253777	PropMg	0.0202511	GenomeWide
LG	TMEB221:250253779	PropMg	0.021159	GenomeWide
LG	TMEB222:250253780	PropMg	0.0193036	GenomeWide
LG	TMEB223:250253781	PropMg	0.01983	GenomeWide
LG	TMEB224:250253782	PropMg	0.0167772	GenomeWide
LG	TMEB225:250253783	PropMg	0.0197642	GenomeWide
LG	TMEB232:250253785	PropMg	0.0722012	GenomeWide
LG	TMEB234:250253787	PropMg	0.016014	GenomeWide
LG	TMEB235:250253786	PropMg	0.015764	GenomeWide
LG	TMEB237:250253788	PropMg	0.031199	GenomeWide
LG	TMEB239:250253789	PropMg	0.0177509	GenomeWide
LG	TMEB243:250253790	PropMg	0.0199879	GenomeWide
LG	TMEB247:250253791	PropMg	0.0149876	GenomeWide
LG	TMEB251:250253792	PropMg	0.0460945	GenomeWide
LG	TMEB252:250253793	PropMg	0.0185668	GenomeWide
LG	TMEB255:250253794	PropMg	0.0585162	GenomeWide
LG	TMEB256:250253796	PropMg	0.016764	GenomeWide
LG	TMEB258:250253797	PropMg	0.0793068	GenomeWide
LG	TMEB262:250253798	PropMg	0.0259619	GenomeWide
LG	TMEB265:250253799	PropMg	0.0168298	GenomeWide
LG	TMEB270:250253800	PropMg	0.0240276	GenomeWide
LG	TMEB274:250253801	PropMg	0.0747539	GenomeWide
LG	TMEB279:250253802	PropMg	0.0163693	GenomeWide
LG	TMEB282:250253803	PropMg	0.0250671	GenomeWide
LG	TMEB286:250253804	PropMg	0.0268435	GenomeWide
LG	TMEB287:250253805	PropMg	0.0341992	GenomeWide
LG	TMEB288:250253806	PropMg	0.0186457	GenomeWide
LG	TMEB291:250253807	PropMg	0.0158035	GenomeWide
LG	TMEB296:250253808	PropMg	0.0164351	GenomeWide
LG	TMEB299:250253809	PropMg	0.0198037	GenomeWide
LG	TMEB329:250253810	PropMg	0.0170535	GenomeWide
LG	TMEB339:250253811	PropMg	0.0593847	GenomeWide
LG	TMEB340:250253812	PropMg	0.0224749	GenomeWide
LG	TMEB379:250253813	PropMg	0.0478315	GenomeWide
LG	TMEB380:250253846	PropMg	0.0156587	GenomeWide
LG	TMEB381:250253847	PropMg	0.0151455	GenomeWide
LG	TMEB388:250253850	PropMg	0.0733591	GenomeWide
LG	TMEB394:250253852	PropMg	0.030449	GenomeWide
LG	TMEB396:250253853	PropMg	0.0309753	GenomeWide
LG	TMEB397:250253854	PropMg	0.0156061	GenomeWide
LG	TMEB398:250253855	PropMg	0.0305148	GenomeWide
LG	TMEB401:250253856	PropMg	0.0168298	GenomeWide
LG	TMEB402:250253857	PropMg	0.0151719	GenomeWide
LG	TMEB403:250253858	PropMg	0.0163693	GenomeWide
LG	TMEB408:250253859	PropMg	0.0312385	GenomeWide
LG	TMEB410:250253860	PropMg	0.0215011	GenomeWide
LG	TMEB412:250253861	PropMg	0.0153824	GenomeWide
LG	TMEB416:250253862	PropMg	0.0149087	GenomeWide
LG	TMEB418:250253864	PropMg	0.0165535	GenomeWide
LG	TMEB419:250253865	PropMg	0.019751	GenomeWide
LG	TMEB421:250253866	PropMg	0.0166456	GenomeWide
LG	TMEB422:250253867	PropMg	0.0378704	GenomeWide
LG	TMEB423:250253868	PropMg	0.0574372	GenomeWide
LG	TMEB424:250253869	PropMg	0.0576215	GenomeWide
LG	TMEB427:250253870	PropMg	0.0370019	GenomeWide
LG	TMEB428:250253871	PropMg	0.0616875	GenomeWide
LG	TMEB430:250253872	PropMg	0.0595426	GenomeWide
LG	TMEB431:250253873	PropMg	0.0604374	GenomeWide
LG	TMEB433:250253874	PropMg	0.0147376	GenomeWide
LG	TMEB435:250253875	PropMg	0.0195537	GenomeWide
LG	TMEB437:250253876	PropMg	0.0145139	GenomeWide
LG	TMEB439:250253877	PropMg	0.0609374	GenomeWide
LG	TMEB440:250253878	PropMg	0.0601742	GenomeWide
LG	TMEB443:250253879	PropMg	0.0157377	GenomeWide
LG	TMEB445:250253881	PropMg	0.0176062	GenomeWide
LG	TMEB449:250253883	PropMg	0.0147245	GenomeWide
LG	TMEB454:250253884	PropMg	0.0312122	GenomeWide
LG	TMEB455:250253885	PropMg	0.0199089	GenomeWide
LG	TMEB459:250253886	PropMg	0.027712	GenomeWide
LG	TMEB463:250253887	PropMg	0.0152903	GenomeWide
LG	TMEB468:250253888	PropMg	0.0166193	GenomeWide
LG	TMEB469:250253889	PropMg	0.0190273	GenomeWide
LG	TMEB470:250253890	PropMg	0.0277646	GenomeWide
LG	TMEB474:250253891	PropMg	0.0152903	GenomeWide
LG	TMEB477:250253892	PropMg	0.0201458	GenomeWide
LG	TMEB478:250253893	PropMg	0.014435	GenomeWide
LG	TMEB480:250253894	PropMg	0.0200668	GenomeWide
LG	TMEB481:250253895	PropMg	0.0200274	GenomeWide
LG	TMEB482:250253896	PropMg	0.0196063	GenomeWide
LG	TMEB486:250253897	PropMg	0.0152508	GenomeWide
LG	TMEB491:250253898	PropMg	0.0182904	GenomeWide
LG	TMEB494:250253899	PropMg	0.0202379	GenomeWide
LG	TMEB496:250253900	PropMg	0.0159745	GenomeWide
LG	TMEB497:250253901	PropMg	0.0165272	GenomeWide
LG	TMEB499:250253902	PropMg	0.0298042	GenomeWide
LG	TMEB503:250253904	PropMg	0.0175141	GenomeWide
LG	TMEB508:250253907	PropMg	0.017922	GenomeWide
LG	TMEB514:250253909	PropMg	0.0180009	GenomeWide
LG	TMEB515:250253910	PropMg	0.0302121	GenomeWide
LG	TMEB516:250253911	PropMg	0.0171062	GenomeWide
LG	TMEB518:250253912	PropMg	0.0314095	GenomeWide
LG	TMEB527:250253914	PropMg	0.0196852	GenomeWide
LG	TMEB533:250253915	PropMg	0.0157903	GenomeWide
LG	TMEB534:250253916	PropMg	0.015764	GenomeWide
LG	TMEB537:250253917	PropMg	0.0182378	GenomeWide
LG	TMEB538:250253918	PropMg	0.0166456	GenomeWide
LG	TMEB539:250253919	PropMg	0.0216459	GenomeWide
LG	TMEB540:250253920	PropMg	0.0168167	GenomeWide
LG	TMEB542:250253921	PropMg	0.0730433	GenomeWide
LG	TMEB546:250253923	PropMg	0.0163824	GenomeWide
LG	TMEB557:250253922	PropMg	0.0195668	GenomeWide
LG	TMEB568:250253924	PropMg	0.0164351	GenomeWide
LG	TMEB570:250253925	PropMg	0.0176325	GenomeWide
LG	TMEB574:250253926	PropMg	0.077583	GenomeWide
LG	TMEB577:250253927	PropMg	0.0411601	GenomeWide
LG	TMEB583:250253928	PropMg	0.0305148	GenomeWide
LG	TMEB585:250253929	PropMg	0.0163956	GenomeWide
LG	TMEB586:250253930	PropMg	0.0182378	GenomeWide
LG	TMEB590:250253931	PropMg	0.0774909	GenomeWide
LG	TMEB591:250253932	PropMg	0.024896	GenomeWide
LG	TMEB592:250253933	PropMg	0.0170141	GenomeWide
LG	TMEB594:250253935	PropMg	0.0172509	GenomeWide
LG	TMEB597:250253936	PropMg	0.0165535	GenomeWide
LG	TMEB599:250253937	PropMg	0.0170798	GenomeWide
LG	TMEB600:250253938	PropMg	0.0196326	GenomeWide
LG	TMEB604:250253939	PropMg	0.0392652	GenomeWide
LG	TMEB613:250253940	PropMg	0.0602137	GenomeWide
LG	TMEB614:250253941	PropMg	0.0211853	GenomeWide
LG	TMEB615:250253973	PropMg	0.0771225	GenomeWide
LG	TMEB620:250253974	PropMg	0.0158035	GenomeWide
LG	TMEB621:250253975	PropMg	0.0290147	GenomeWide
LG	TMEB624:250253977	PropMg	0.0153429	GenomeWide
LG	TMEB625:250253978	PropMg	0.0272383	GenomeWide
LG	TMEB628:250253979	PropMg	0.0502	GenomeWide
LG	TMEB629:250253980	PropMg	0.0499632	GenomeWide
LG	TMEB630:250253981	PropMg	0.0500421	GenomeWide
LG	TMEB633:250253982	PropMg	0.0166193	GenomeWide
LG	TMEB634:250253983	PropMg	0.0151192	GenomeWide
LG	TMEB636:250253984	PropMg	0.0154482	GenomeWide
LG	TMEB637:250253986	PropMg	0.0154087	GenomeWide
LG	TMEB638:250253987	PropMg	0.0152508	GenomeWide
LG	TMEB640:250253988	PropMg	0.0142771	GenomeWide
LG	TMEB641:250253989	PropMg	0.0151982	GenomeWide
LG	TMEB644:250253990	PropMg	0.0174878	GenomeWide
LG	TMEB693:250304606	PropMg	0.0156982	GenomeWide
LG	TMEB700:250253992	PropMg	0.017093	GenomeWide
LG	TMEB702:250253994	PropMg	0.0174351	GenomeWide
LG	TMEB708:250253995	PropMg	0.0165667	GenomeWide
LG	TMEB711:250253996	PropMg	0.016593	GenomeWide
LG	TMEB713:250253997	PropMg	0.0147639	GenomeWide
LG	TMEB721:250253998	PropMg	0.0209222	GenomeWide
LG	TMEB735:250253999	PropMg	0.0744513	GenomeWide
LG	TMEB738:250254000	PropMg	0.0183168	GenomeWide
LG	TMEB745:250254001	PropMg	0.0157508	GenomeWide
LG	TMEB746:250254002	PropMg	0.0154482	GenomeWide
LG	TMEB757:250254004	PropMg	0.0157245	GenomeWide
LG	TMEB762:250254005	PropMg	0.0161061	GenomeWide
LG	TMEB771:250254007	PropMg	0.0780436	GenomeWide
LG	TMEB778:250254008	PropMg	0.0605821	GenomeWide
LG	TMEB781:250254009	PropMg	0.0602532	GenomeWide
LG	TMEB783:250254010	PropMg	0.066464	GenomeWide
LG	TMEB785:250254011	PropMg	0.0597795	GenomeWide
LG	TMEB786:250254012	PropMg	0.0585162	GenomeWide
LG	TMEB790:250254013	PropMg	0.0176588	GenomeWide
LG	TMEB791:250254014	PropMg	0.0191326	GenomeWide
LG	TMEB829:250254017	PropMg	0.0773199	GenomeWide
LG	TMEB885:250254020	PropMg	0.0153034	GenomeWide
LG	TMEB898:250254021	PropMg	0.0158956	GenomeWide
LG	TMEB900:250254022	PropMg	0.0168167	GenomeWide
LG	TMEB909:250254023	PropMg	0.0696089	GenomeWide
LG	TMEB911:250254024	PropMg	0.0693721	GenomeWide
LG	TMEB916:250254025	PropMg	0.0285147	GenomeWide
LG	TMEB921:250254026	PropMg	0.0191457	GenomeWide
LG	TMEB922:250254027	PropMg	0.0201326	GenomeWide
LG	TMEB923:250254028	PropMg	0.0226591	GenomeWide
LG	TMEB930:250254029	PropMg	0.0166193	GenomeWide
LG	TMEB931:250254030	PropMg	0.078241	GenomeWide
LG	TMEB933:250254031	PropMg	0.0276594	GenomeWide
LG	TMEB934:250254032	PropMg	0.0144087	GenomeWide
LG	TMEB937:250254033	PropMg	0.0764251	GenomeWide
LG	TMEB939:250254034	PropMg	0.0153429	GenomeWide
LG	TMEB941:250254035	PropMg	0.0754119	GenomeWide
LG	TMEB945:250254036	PropMg	0.0281989	GenomeWide
LG	TMEB947:250254037	PropMg	0.0768461	GenomeWide
LG	TMEB948:250254038	PropMg	0.0772146	GenomeWide
LG	TMEB949:250254040	PropMg	0.0160403	GenomeWide
LG	TMEB952:250254041	PropMg	0.0586873	GenomeWide
LG	TMEB953:250254042	PropMg	0.0207511	GenomeWide
LG	TMEB955:250254043	PropMg	0.0221854	GenomeWide
LG	TMEB956:250254044	PropMg	0.0664509	GenomeWide
LG	TMEB960:250254045	PropMg	0.0159219	GenomeWide
LG	TMEB961:250254046	PropMg	0.0331333	GenomeWide
LG	TMEB965:250254047	PropMg	0.0261198	GenomeWide
LG	TMEB971:250254049	PropMg	0.0197247	GenomeWide
LG	TMEB975:250254050	PropMg	0.0194747	GenomeWide
LG	TMEB979:250254052	PropMg	0.0230144	GenomeWide
LG	TMEB981:250254053	PropMg	0.0156456	GenomeWide
LG	TMEB982:250254054	PropMg	0.0216196	GenomeWide
LG	TMEB983:250254055	PropMg	0.0712143	GenomeWide
LG	TMEB984:250254056	PropMg	0.0146981	GenomeWide
LG	TMEB985:250254057	PropMg	0.0174614	GenomeWide
LG	TMEB990:250254058	PropMg	0.03037	GenomeWide
LG	TMEB992:250254060	PropMg	0.0155798	GenomeWide
LG	TMEB994:250254061	PropMg	0.0170272	GenomeWide
LG	TMEB996:250254062	PropMg	0.0148692	GenomeWide
LG	TMEB998:250254063	PropMg	0.0147639	GenomeWide
LG	TMEB1000:250254064	PropMg	0.0190142	GenomeWide
LG	TMEB1001:250254065	PropMg	0.0244618	GenomeWide
LG	TMEB1002:250254066	PropMg	0.0170404	GenomeWide
LG	TMEB1008:250254068	PropMg	0.013606	GenomeWide
LG	TMEB1009:250254100	PropMg	0.0164877	GenomeWide
LG	TMEB1010:250254101	PropMg	0.0147639	GenomeWide
LG	TMEB1018:250254102	PropMg	0.0350282	GenomeWide
LG	TMEB1019:250254103	PropMg	0.0151324	GenomeWide
LG	TMEB1021:250254105	PropMg	0.0151587	GenomeWide
LG	TMEB1022:250254106	PropMg	0.056753	GenomeWide
LG	TMEB1024:250254107	PropMg	0.0169877	GenomeWide
LG	TMEB1025:250254108	PropMg	0.0154613	GenomeWide
LG	TMEB1027:250254109	PropMg	0.0782146	GenomeWide
LG	TMEB1032:250254111	PropMg	0.0766751	GenomeWide
LG	TMEB1034:250254112	PropMg	0.0764514	GenomeWide
LG	TMEB1038:250254113	PropMg	0.0304884	GenomeWide
LG	TMEB1040:250254114	PropMg	0.0289884	GenomeWide
LG	TMEB1042:250254115	PropMg	0.0203432	GenomeWide
LG	TMEB1044:250254116	PropMg	0.0205274	GenomeWide
LG	TMEB1045:250254117	PropMg	0.0161061	GenomeWide
LG	TMEB1046:250254118	PropMg	0.0153166	GenomeWide
LG	TMEB1047:250254119	PropMg	0.0149087	GenomeWide
LG	TMEB1048:250254120	PropMg	0.0564109	GenomeWide
LG	TMEB1049:250254121	PropMg	0.0162772	GenomeWide
LG	TMEB1050:250254122	PropMg	0.0288963	GenomeWide
LG	TMEB1052:250254123	PropMg	0.0151192	GenomeWide
LG	TMEB1070:250254124	PropMg	0.0784647	GenomeWide
LG	TMEB1072:250254125	PropMg	0.0567661	GenomeWide
LG	TMEB1099:250254127	PropMg	0.0613322	GenomeWide
LG	TMEB1105:250254128	PropMg	0.0600163	GenomeWide
LG	TMEB1108:250254129	PropMg	0.0181325	GenomeWide
LG	TMEB1109:250254130	PropMg	0.0563319	GenomeWide
LG	TMEB1116:250254132	PropMg	0.0619769	GenomeWide
LG	TMEB1120:250254133	PropMg	0.0754119	GenomeWide
LG	TMEB1131:250254134	PropMg	0.0171456	GenomeWide
LG	TMEB1135:250254135	PropMg	0.0612006	GenomeWide
LG	TMEB1142:250254136	PropMg	0.0238565	GenomeWide
LG	TMEB1143:250254137	PropMg	0.0146192	GenomeWide
LG	TMEB1164:250254140	PropMg	0.0232249	GenomeWide
LG	TMEB1199:250254142	PropMg	0.015264	GenomeWide
LG	TMEB1200:250254143	PropMg	0.0712801	GenomeWide
LG	TMEB1212:250254144	PropMg	0.0616348	GenomeWide
LG	TMEB1215:250254145	PropMg	0.0645692	GenomeWide
LG	TMEB1218:250254146	PropMg	0.0151061	GenomeWide
LG	TMEB1221:250254147	PropMg	0.0303569	GenomeWide
LG	TMEB1222:250254148	PropMg	0.0380152	GenomeWide
LG	TMEB1224:250254149	PropMg	0.0185404	GenomeWide
LG	TMEB1227:250254150	PropMg	0.0147245	GenomeWide
LG	TMEB1228:250254151	PropMg	0.0478578	GenomeWide
LG	TMEB1231:250254152	PropMg	0.0191194	GenomeWide
LG	TMEB1232:250254153	PropMg	0.0433839	GenomeWide
LG	TMEB1234:250254154	PropMg	0.0148429	GenomeWide
LG	TMEB1237:250254155	PropMg	0.0161851	GenomeWide
LG	TMEB1238:250254156	PropMg	0.0159087	GenomeWide
LG	TMEB1240:250254157	PropMg	0.101111	GenomeWide
LG	TMEB1241:250254158	PropMg	0.0370283	GenomeWide
LG	TMEB1242:250254159	PropMg	0.0166851	GenomeWide
LG	TMEB1243:250254160	PropMg	0.0166456	GenomeWide
LG	TMEB1244:250254161	PropMg	0.0186326	GenomeWide
LG	TMEB1245:250254162	PropMg	0.0296858	GenomeWide
LG	TMEB1246:250254163	PropMg	0.0173299	GenomeWide
LG	TMEB1248:250254165	PropMg	0.0533581	GenomeWide
LG	TMEB1249:250254166	PropMg	0.0160008	GenomeWide
LG	TMEB1253:250254167	PropMg	0.0154745	GenomeWide
LG	TMEB1254:250254168	PropMg	0.0601611	GenomeWide
LG	TMEB1255:250254169	PropMg	0.0612795	GenomeWide
LG	TMEB1257:250254170	PropMg	0.0180799	GenomeWide
LG	TMEB1258:250254171	PropMg	0.0184352	GenomeWide
LG	TMEB1260:250254172	PropMg	0.0506737	GenomeWide
LG	TMEB1262:250254173	PropMg	0.0302779	GenomeWide
LG	TMEB1263:250254174	PropMg	0.0194616	GenomeWide
LG	TMEB1264:250254175	PropMg	0.0724775	GenomeWide
LG	TMEB1266:250254176	PropMg	0.0368967	GenomeWide
LG	TMEB1267:250254177	PropMg	0.0394494	GenomeWide
LG	TMEB1268:250254178	PropMg	0.0300279	GenomeWide
LG	TMEB1269:250254179	PropMg	0.0324228	GenomeWide
LG	TMEB1272:250254180	PropMg	0.0157245	GenomeWide
LG	TMEB1273:250254182	PropMg	0.0657929	GenomeWide
LG	TMEB1274:250254183	PropMg	0.0191063	GenomeWide
LG	TMEB1275:250254184	PropMg	0.0197116	GenomeWide
LG	TMEB1276:250254185	PropMg	0.0771093	GenomeWide
LG	TMEB1277:250254186	PropMg	0.0330807	GenomeWide
LG	TMEB1278:250254187	PropMg	0.0167377	GenomeWide
LG	TMEB1279:250254188	PropMg	0.0352387	GenomeWide
LG	TMEB1282:250254190	PropMg	0.0172114	GenomeWide
LG	TMEB1280:250254189	PropMg	0.0304227	GenomeWide
LG	TMEB1283:250254191	PropMg	0.018501	GenomeWide
LG	TMEB1284:250254192	PropMg	0.0193563	GenomeWide
LG	TMEB1286:250254193	PropMg	0.035765	GenomeWide
LG	TMEB1289:250254194	PropMg	0.0201326	GenomeWide
LG	TMEB1291:250254195	PropMg	0.0151587	GenomeWide
LG	TMEB1294:250254227	PropMg	0.0245539	GenomeWide
LG	TMEB1295:250254228	PropMg	0.0508448	GenomeWide
LG	TMEB1296:250254230	PropMg	0.0780567	GenomeWide
LG	TMEB1298:250254231	PropMg	0.0479499	GenomeWide
LG	TMEB1299:250254233	PropMg	0.0762014	GenomeWide
LG	TMEB1303:250254234	PropMg	0.0189484	GenomeWide
LG	TMEB1304:250254235	PropMg	0.0286199	GenomeWide
LG	TMEB1305:250254236	PropMg	0.0156324	GenomeWide
LG	TMEB1309:250254237	PropMg	0.0176457	GenomeWide
LG	TMEB1310:250304612	PropMg	0.0668193	GenomeWide
LG	TMEB1314:250254239	PropMg	0.0606611	GenomeWide
LG	TMEB1317:250254241	PropMg	0.0330281	GenomeWide
LG	TMEB1321:250254242	PropMg	0.0353045	GenomeWide
LG	TMEB1329:250254243	PropMg	0.0158166	GenomeWide
LG	TMEB1332:250254245	PropMg	0.0638323	GenomeWide
LG	TMEB1333:250254246	PropMg	0.0648718	GenomeWide
LG	TMEB1334:250254247	PropMg	0.0813201	GenomeWide
LG	TMEB1335:250254248	PropMg	0.0193168	GenomeWide
LG	TMEB1336:250304542	PropMg	0.0657666	GenomeWide
LG	TMEB1367:250254267	PropMg	0.0164219	GenomeWide
LG	TMEB1340:250254252	PropMg	0.020409	GenomeWide
LG	TMEB1341:250254253	PropMg	0.0703721	GenomeWide
LG	TMEB1342:250254254	PropMg	0.0380415	GenomeWide
LG	TMEB1345:250254255	PropMg	0.0345808	GenomeWide
LG	TMEB1346:250254256	PropMg	0.0353834	GenomeWide
LG	TMEB1347:250254257	PropMg	0.0653324	GenomeWide
LG	TMEB1348:250254258	PropMg	0.0169088	GenomeWide
LG	TMEB1349:250254259	PropMg	0.0473314	GenomeWide
LG	TMEB1350:250254260	PropMg	0.0354756	GenomeWide
LG	TMEB1351:250254261	PropMg	0.0725696	GenomeWide
LG	TMEB1353:250254262	PropMg	0.0154482	GenomeWide
LG	TMEB1360:250254264	PropMg	0.0254619	GenomeWide
LG	TMEB1364:250254265	PropMg	0.0163693	GenomeWide
LG	TMEB1368:250254268	PropMg	0.0154613	GenomeWide
LG	TMEB1369:250254269	PropMg	0.014606	GenomeWide
LG	TMEB1370:250254270	PropMg	0.0161851	GenomeWide
LG	TMEB1380:250254272	PropMg	0.0167904	GenomeWide
LG	TMEB1381:250254273	PropMg	0.016014	GenomeWide
LG	TMEB1382:250254274	PropMg	0.0159219	GenomeWide
LG	TMEB1383:250254275	PropMg	0.0307253	GenomeWide
LG	TMEB1384:250254276	PropMg	0.0194616	GenomeWide
LG	TMEB1386:250254277	PropMg	0.0193431	GenomeWide
LG	TMEB1391:250254278	PropMg	0.0163298	GenomeWide
LG	TMEB1393:250254279	PropMg	0.0159745	GenomeWide
LG	TMEB1394:250254280	PropMg	0.0163693	GenomeWide
LG	TMEB1408:250254281	PropMg	0.0142244	GenomeWide
LG	TMEB1411:250254282	PropMg	0.0200537	GenomeWide
LG	TMEB1417:250254285	PropMg	0.0204221	GenomeWide
LG	TMEB1418:250254286	PropMg	0.0154482	GenomeWide
LG	TMEB1419:250254287	PropMg	0.0202379	GenomeWide
LG	TMEB1428:250254288	PropMg	0.0154877	GenomeWide
LG	TMEB1430:250254289	PropMg	0.0162772	GenomeWide
LG	TMEB1432:250254291	PropMg	0.0766225	GenomeWide
LG	TMEB1433:250254292	PropMg	0.0145666	GenomeWide
LG	TMEB1442:250254294	PropMg	0.0159087	GenomeWide
LG	TMEB1446:250254296	PropMg	0.0164877	GenomeWide
LG	TMEB1447:250254297	PropMg	0.0159745	GenomeWide
LG	TMEB1448:250254298	PropMg	0.0185141	GenomeWide
LG	TMEB1450:250254299	PropMg	0.0148824	GenomeWide
LG	TMEB1458:250254300	PropMg	0.0363045	GenomeWide
LG	TMEB1462:250254420	PropMg	0.0210932	GenomeWide
LG	TMEB1463:250254301	PropMg	0.0353176	GenomeWide
LG	TMEB1468:250254302	PropMg	0.0326333	GenomeWide
LG	TMEB1470:250254303	PropMg	0.0382389	GenomeWide
LG	TMEB1471:250254304	PropMg	0.0302253	GenomeWide
LG	TMEB1484:250254305	PropMg	0.015764	GenomeWide
LG	TMEB1485:250254306	PropMg	0.0199747	GenomeWide
LG	TMEB1486:250254307	PropMg	0.0304095	GenomeWide
LG	TMEB1488:250254308	PropMg	0.015685	GenomeWide
LG	TMEB1490:250254309	PropMg	0.0146192	GenomeWide
LG	TMEB1491:250254310	PropMg	0.0204484	GenomeWide
LG	TMEB1497:250254311	PropMg	0.0411337	GenomeWide
LG	TMEB1499:250254312	PropMg	0.0196852	GenomeWide
LG	TMEB1502:250254314	PropMg	0.0254355	GenomeWide
LG	TMEB1503:250254315	PropMg	0.077412	GenomeWide
LG	TMEB1509:250254317	PropMg	0.0160535	GenomeWide
LG	TMEB1510:250254318	PropMg	0.0161456	GenomeWide
LG	TMEB1515:250254319	PropMg	0.0767672	GenomeWide
LG	TMEB1517:250254321	PropMg	0.0435549	GenomeWide
LG	TMEB1519:250254322	PropMg	0.0156324	GenomeWide
LG	TMEB1529:250254354	PropMg	0.0159614	GenomeWide
LG	TMEB1531:250254355	PropMg	0.0303042	GenomeWide
LG	TMEB1534:250254356	PropMg	0.0158824	GenomeWide
LG	TMEB1540:250254357	PropMg	0.0601874	GenomeWide
LG	TMEB1541:250254358	PropMg	0.0602005	GenomeWide
LG	TMEB1548:250254359	PropMg	0.016264	GenomeWide
LG	TMEB1549:250254361	PropMg	0.0149613	GenomeWide
LG	TMEB1550:250254362	PropMg	0.016264	GenomeWide
LG	TMEB1552:250254364	PropMg	0.0602663	GenomeWide
LG	TMEB1553:250254366	PropMg	0.0172246	GenomeWide
LG	TMEB1556:250254367	PropMg	0.0150008	GenomeWide
LG	TMEB1560:250254369	PropMg	0.0153298	GenomeWide
LG	TMEB1571:250254370	PropMg	0.0612927	GenomeWide
LG	TMEB1572:250254371	PropMg	0.0177378	GenomeWide
LG	TMEB1574:250254372	PropMg	0.0157245	GenomeWide
LG	TMEB1575:250254373	PropMg	0.0600558	GenomeWide
LG	TMEB1582:250254374	PropMg	0.0158166	GenomeWide
LG	TMEB1585:250254375	PropMg	0.0149087	GenomeWide
LG	TMEB1589:250254377	PropMg	0.0160798	GenomeWide
LG	TMEB1590:250254378	PropMg	0.0157377	GenomeWide
LG	TMEB1591:250254379	PropMg	0.0329754	GenomeWide
LG	TMEB1592:250254380	PropMg	0.0578188	GenomeWide
LG	TMEB1593:250254382	PropMg	0.0146455	GenomeWide
LG	TMEB1597:250254383	PropMg	0.0151982	GenomeWide
LG	TMEB1599:250254384	PropMg	0.0197116	GenomeWide
LG	TMEB1600:250254385	PropMg	0.0155535	GenomeWide
LG	TMEB1601:250254386	PropMg	0.0150139	GenomeWide
LG	TMEB1602:250254387	PropMg	0.0151192	GenomeWide
LG	TMEB1607:250254388	PropMg	0.0777541	GenomeWide
LG	TMEB1608:250254320	PropMg	0.0223696	GenomeWide
LG	TMEB1609:250254271	PropMg	0.0172772	GenomeWide
LG	TMEB1612:250254263	PropMg	0.0170798	GenomeWide
LG	TMEB1620:250253908	PropMg	0.0212906	GenomeWide
LG	TMEB1622:250253882	PropMg	0.0173825	GenomeWide
LG	TMEB1624:250253880	PropMg	0.0156719	GenomeWide
LG	TMEB1625:250253849	PropMg	0.0156192	GenomeWide
LG	TMEB1627:250253773	PropMg	0.0497131	GenomeWide
LG	TMEB1628:250253784	PropMg	0.0170798	GenomeWide
LG	TMEB1631:250253746	PropMg	0.017172	GenomeWide
LG	TMEB1635:250253646	PropMg	0.0161061	GenomeWide
LG	TMEB1639:250254390	PropMg	0.0159087	GenomeWide
LG	TMEB1641:250254392	PropMg	0.0169088	GenomeWide
LG	TMEB1643:250254393	PropMg	0.0167509	GenomeWide
LG	TMEB1646:250254394	PropMg	0.0147639	GenomeWide
LG	TMEB1648:250254396	PropMg	0.0159482	GenomeWide
LG	TMEB1652:250254397	PropMg	0.0176062	GenomeWide
LG	TMEB1656:250254398	PropMg	0.0180667	GenomeWide
LG	TMEB1705:250254403	PropMg	0.0149745	GenomeWide
LG	TMEB1709:250254404	PropMg	0.0811227	GenomeWide
LG	TMEB1711:250254405	PropMg	0.0166456	GenomeWide
LG	TMEB1712:250254407	PropMg	0.0164219	GenomeWide
LG	TMEB1715:250254408	PropMg	0.0169746	GenomeWide
LG	TMEB1718:250254409	PropMg	0.0180141	GenomeWide
LG	TMEB1719:250254410	PropMg	0.014856	GenomeWide
LG	TMEB1720:250254411	PropMg	0.0148955	GenomeWide
LG	TMEB1723:250254412	PropMg	0.0166851	GenomeWide
LG	TMEB1732:250254413	PropMg	0.0153824	GenomeWide
LG	TMEB1733:250254414	PropMg	0.0224617	GenomeWide
LG	TMEB1735:250254415	PropMg	0.0571083	GenomeWide
LG	TMEB1736:250254416	PropMg	0.0183299	GenomeWide
LG	TMEB1783:250254428	PropMg	0.0173957	GenomeWide
LG	TMEB1785:250254429	PropMg	0.0288173	GenomeWide
LG	TMEB77:250253642	PropMg	0.0157245	GenomeWide
LG	TMEB507:250253906	PropMg	0.0299621	GenomeWide
LG	TMEB701:250253993	PropMg	0.0776883	GenomeWide
LG	TMEB849:250254018	PropMg	0.0612664	GenomeWide
LG	TMEB966:250254048	PropMg	0.0267382	GenomeWide
LG	TMEB1443:250254295	PropMg	0.0155666	GenomeWide
LG	TMEB1667:250254400	PropMg	0.0150666	GenomeWide
LG	TMEB1669:250254401	PropMg	0.0153824	GenomeWide
LG	TMEB1793:250254433	PropMg	0.038002	GenomeWide
LG	TMEB1794:250254434	PropMg	0.0342781	GenomeWide
LG	TMEB1795:250254435	PropMg	0.0180141	GenomeWide
LG	TMEB1796:250254436	PropMg	0.0265803	GenomeWide
LG	TMEB1800:250254439	PropMg	0.064306	GenomeWide
LG	TMEB1804:250254441	PropMg	0.0647666	GenomeWide
LG	TMEB1806:250254443	PropMg	0.0243302	GenomeWide
LG	TMEB1809:250254445	PropMg	0.0472393	GenomeWide
LG	TMEB1810:250254446	PropMg	0.0163298	GenomeWide
LG	TMEB1811:250254447	PropMg	0.017172	GenomeWide
LG	TMEB1812:250254448	PropMg	0.0221064	GenomeWide
LG	TMEB1813:250254449	PropMg	0.0218433	GenomeWide
LG	TMEB1815:250254481	PropMg	0.0321464	GenomeWide
LG	TMEB1816:250254482	PropMg	0.0538581	GenomeWide
LG	TMEB1817:250254483	PropMg	0.0593715	GenomeWide
LG	TMEB1818:250254484	PropMg	0.0192642	GenomeWide
LG	TMEB1822:250254486	PropMg	0.0156587	GenomeWide
LG	TMEB1831:250254493	PropMg	0.0197379	GenomeWide
LG	TMEB1833:250254494	PropMg	0.0470419	GenomeWide
LG	TMEB1837:250254495	PropMg	0.034515	GenomeWide
LG	TMEB1841:250254496	PropMg	0.014606	GenomeWide
LG	TMEB1842:250254497	PropMg	0.0145139	GenomeWide
LG	TMEB1845:250254498	PropMg	0.0150403	GenomeWide
LG	TMEB1846:250254499	PropMg	0.0144744	GenomeWide
LG	TMEB1848:250254500	PropMg	0.0154613	GenomeWide
LG	TMEB1851:250254502	PropMg	0.0156192	GenomeWide
LG	TMEB1853:250254503	PropMg	0.0147771	GenomeWide
LG	TMEB1854:250254504	PropMg	0.0168562	GenomeWide
LG	TMEB1855:250254506	PropMg	0.0145666	GenomeWide
LG	TMEB1858:250254507	PropMg	0.0174088	GenomeWide
LG	TMEB1865:250254508	PropMg	0.0150008	GenomeWide
LG	TMEB1869:250254509	PropMg	0.0173167	GenomeWide
LG	TMEB1875:250254510	PropMg	0.0173825	GenomeWide
LG	TMEB1876:250254511	PropMg	0.016014	GenomeWide
LG	TMEB1775:250254425	PropMg	0.0645034	GenomeWide
LG	TMEB1776:250254426	PropMg	0.0174088	GenomeWide
LG	TMEB1777:250254427	PropMg	0.0199089	GenomeWide
LG	TMEB1787:250254430	PropMg	0.117743	GenomeWide
LG	TMEB1788:250254431	PropMg	0.0674114	GenomeWide
LG	TMEB1879:250254512	PropMg	0.0286462	GenomeWide
LG	TMEB1882:250254513	PropMg	0.0329754	GenomeWide
LG	TMEB1883:250254514	PropMg	0.0350808	GenomeWide
LG	TMEB1884:250254515	PropMg	0.0379757	GenomeWide
LG	TMEB1885:250254516	PropMg	0.0345018	GenomeWide
LG	TMEB1886:250254517	PropMg	0.0739907	GenomeWide
LG	TMEB1887:250254518	PropMg	0.034686	GenomeWide
LG	TMEB1888:250254519	PropMg	0.0340413	GenomeWide
LG	TMEB1889:250254520	PropMg	0.0158561	GenomeWide
LG	TMEB1891:250254523	PropMg	0.0577399	GenomeWide
LG	TMEB1894:250254524	PropMg	0.0298832	GenomeWide
LG	TMEB1897:250254525	PropMg	0.016014	GenomeWide
LG	TMEB1902:250254526	PropMg	0.0179088	GenomeWide
LG	TMEB1907:250254529	PropMg	0.0663588	GenomeWide
LG	TMEB1909:250254531	PropMg	0.0237118	GenomeWide
LG	TMEB1913:250254533	PropMg	0.0171193	GenomeWide
LG	TMEB1914:250254534	PropMg	0.0312648	GenomeWide
LG	TMEB1915:250254535	PropMg	0.0240934	GenomeWide
LG	TMEB1916:250254536	PropMg	0.0374493	GenomeWide
LG	TMEB1917:250254537	PropMg	0.0329491	GenomeWide
LG	TMEB1921:250254538	PropMg	0.0208695	GenomeWide
LG	TMEB1922:250254539	PropMg	0.0277778	GenomeWide
LG	TMEB1923:250254540	PropMg	0.107558	GenomeWide
LG	TMEB1924:250254542	PropMg	0.0293568	GenomeWide
LG	TMEB1928:250254543	PropMg	0.0746618	GenomeWide
LG	TMEB1931:250254544	PropMg	0.0401337	GenomeWide
LG	TMEB1932:250254545	PropMg	0.0299884	GenomeWide
LG	TMEB1559:250254368	PropMg	0.0154087	GenomeWide
LG	TMEB1588:250254376	PropMg	0.0776093	GenomeWide
LG	TMEB1740:250254417	PropMg	0.0187641	GenomeWide
LG	TMEB1742:250254419	PropMg	0.0145402	GenomeWide
LG	TMEB1771:250254422	PropMg	0.0170798	GenomeWide
LG	TMEB1797:250254437	PropMg	0.0151455	GenomeWide
LG	TMEB1803:250254440	PropMg	0.0210669	GenomeWide
LG	TMEB1808:250254444	PropMg	0.0147639	GenomeWide
LG	TMEB1821:250254485	PropMg	0.0345281	GenomeWide
LG	TMEB1824:250254489	PropMg	0.0172377	GenomeWide
LG	TMEB1826:250254490	PropMg	0.0159482	GenomeWide
LG	TMEB1827:250254491	PropMg	0.0168562	GenomeWide
LG	TMEB857:250254019	PropMg	0.0178825	GenomeWide
LG	ANG26:250254693	PropMg	0.015935	GenomeWide
LG	96_1414:250254487	PropMg	0.0154877	GenomeWide
LG	KIGOMARED:250254541	PropMg	0.0322385	GenomeWide
LG	L9_204_1613:250254522	PropMg	0.0710564	GenomeWide
LG	L9_304_259:250253679	PropMg	0.0213169	GenomeWide
LG	L9_304_714:250253814	PropMg	0.0198563	GenomeWide
LG	MOCUBA:250254059	PropMg	0.0186457	GenomeWide
LG	NANCHINYAYA_II:250304545	PropMg	0.0385415	GenomeWide
LG	NO2PLAN:250254423	PropMg	0.0565424	GenomeWide
LG	NO7:250254575	PropMg	0.0195142	GenomeWide
LG	SIMONYE:250254432	PropMg	0.0175141	GenomeWide
LG	TMEB1156:250254139	PropMg	0.0167377	GenomeWide
LG	TMEB1315:250254240	PropMg	0.0192905	GenomeWide
LG	TMEB1330:250254244	PropMg	0.022067	GenomeWide
LG	TMEB1337:250254251	PropMg	0.0730433	GenomeWide
LG	TMEB1441:250254293	PropMg	0.0167509	GenomeWide
LG	TMEB1640:250254391	PropMg	0.0205274	GenomeWide
LG	TMEB1647:250254395	PropMg	0.0213827	GenomeWide
LG	TMEB1661:250254399	PropMg	0.015264	GenomeWide
LG	TMEB1741:250254418	PropMg	0.0148034	GenomeWide
LG	TMEB1774:250254424	PropMg	0.0181457	GenomeWide
LG	TMEB1829:250254492	PropMg	0.0157771	GenomeWide
LG	TMEB1890:250254521	PropMg	0.0164088	GenomeWide
LG	TMEB1906:250254528	PropMg	0.0723854	GenomeWide
LG	TMEB1908:250254530	PropMg	0.0234486	GenomeWide
LG	TMEB1942:250254547	PropMg	0.015935	GenomeWide
LG	TMEB1947:250254549	PropMg	0.0296331	GenomeWide
LG	TMEB1955:250254553	PropMg	0.0158429	GenomeWide
LG	TMEB1957:250254555	PropMg	0.0301726	GenomeWide
LG	TMEB1963:250254559	PropMg	0.075925	GenomeWide
LG	TMEB1989:250254563	PropMg	0.0194616	GenomeWide
LG	TMEB1992:250254564	PropMg	0.0167509	GenomeWide
LG	TMEB1997:250254567	PropMg	0.0173299	GenomeWide
LG	TMEB2004:250254571	PropMg	0.0144744	GenomeWide
LG	TMEB2010:250254576	PropMg	0.0178167	GenomeWide
LG	TMEB2012:250254609	PropMg	0.0154613	GenomeWide
LG	TMEB2015:250254611	PropMg	0.0196326	GenomeWide
LG	TMEB2020:250254614	PropMg	0.0144613	GenomeWide
LG	TMEB2023:250254617	PropMg	0.0157245	GenomeWide
LG	TMEB2026:250254619	PropMg	0.0149745	GenomeWide
LG	TMEB2032:250254624	PropMg	0.0147771	GenomeWide
LG	TMEB2036:250254626	PropMg	0.0303437	GenomeWide
LG	TMEB2040:250254630	PropMg	0.0196984	GenomeWide
LG	TMEB2049:250254637	PropMg	0.0167772	GenomeWide
LG	TMEB2050:250254638	PropMg	0.0173035	GenomeWide
LG	TMEB2053:250254639	PropMg	0.0197642	GenomeWide
LG	TMEB2055:250254642	PropMg	0.0297252	GenomeWide
LG	TMEB2064:250254649	PropMg	0.0217248	GenomeWide
LG	TMEB2068:250254653	PropMg	0.0161061	GenomeWide
LG	TMEB2075:250254661	PropMg	0.0209353	GenomeWide
LG	TMEB2077:250254663	PropMg	0.0211064	GenomeWide
LG	TMEB2081:250254666	PropMg	0.0299753	GenomeWide
LG	TMEB2083:250254668	PropMg	0.0157508	GenomeWide
LG	TMEB2085:250254670	PropMg	0.0153955	GenomeWide
LG	TMEB2089:250254673	PropMg	0.0280804	GenomeWide
LG	TMEB2092:250254676	PropMg	0.0155535	GenomeWide
LG	TMEB2096:250254679	PropMg	0.0204616	GenomeWide
LG	TMEB2100:250254683	PropMg	0.0183036	GenomeWide
LG	TMEB2102:250254685	PropMg	0.0283699	GenomeWide
LG	TMEB2104:250254687	PropMg	0.0197116	GenomeWide
LG	TMEB2106:250254689	PropMg	0.048121	GenomeWide
LG	TMEB2108:250254691	PropMg	0.0666219	GenomeWide
LG	TMEB2111:250254695	PropMg	0.0327254	GenomeWide
LG	TMEB2113:250254697	PropMg	0.0216985	GenomeWide
LG	TMEB2115:250254698	PropMg	0.0161851	GenomeWide
LG	TMEB2119:250254700	PropMg	0.017093	GenomeWide
LG	ANG20:250254681	PropMg	0.0191194	GenomeWide
LG	I30555:250254006	PropMg	0.0180667	GenomeWide
LG	KIBANDEMENO:250304621	PropMg	0.0251197	GenomeWide
LG	KIROBA:250253728	PropMg	0.0665956	GenomeWide
LG	L9_304_25:250253934	PropMg	0.017593	GenomeWide
LG	LEBAMBA:250253795	PropMg	0.0226986	GenomeWide
LG	M_TAI_25:250254283	PropMg	0.0302516	GenomeWide
LG	MKONDEZI:250253662	PropMg	0.0205142	GenomeWide
LG	NO1_P2:250254249	PropMg	0.0163561	GenomeWide
LG	NO3_P2:250254657	PropMg	0.0662666	GenomeWide
LG	SILIRA:250254229	PropMg	0.0707142	GenomeWide
LG	SL80_40:250254389	PropMg	0.0739644	GenomeWide
LG	TMEB1148:250254138	PropMg	0.0699774	GenomeWide
LG	TMEB1412:250254284	PropMg	0.0789515	GenomeWide
LG	TMEB1431:250254290	PropMg	0.0701747	GenomeWide
LG	TMEB1501:250254313	PropMg	0.0410022	GenomeWide
LG	TMEB1551:250254363	PropMg	0.0606216	GenomeWide
LG	TMEB157:250253727	PropMg	0.0477262	GenomeWide
LG	TMEB167:250253736	PropMg	0.0319754	GenomeWide
LG	TMEB1904:250254527	PropMg	0.0670693	GenomeWide
LG	TMEB1941:250254546	PropMg	0.0155008	GenomeWide
LG	TMEB1949:250254550	PropMg	0.0187905	GenomeWide
LG	TMEB1952:250254552	PropMg	0.0199747	GenomeWide
LG	TMEB1956:250254554	PropMg	0.0170141	GenomeWide
LG	TMEB1958:250254556	PropMg	0.029791	GenomeWide
LG	TMEB1960:250254557	PropMg	0.03012	GenomeWide
LG	TMEB1982:250254560	PropMg	0.0332123	GenomeWide
LG	TMEB1988:250254562	PropMg	0.0172377	GenomeWide
LG	TMEB1994:250254565	PropMg	0.019001	GenomeWide
LG	TMEB1999:250254568	PropMg	0.0158693	GenomeWide
LG	TMEB2002:250254570	PropMg	0.03037	GenomeWide
LG	TMEB2006:250254572	PropMg	0.0196589	GenomeWide
LG	TMEB2009:250254574	PropMg	0.0154745	GenomeWide
LG	TMEB2011:250254608	PropMg	0.0163956	GenomeWide
LG	TMEB2017:250254612	PropMg	0.0623322	GenomeWide
LG	TMEB2021:250254615	PropMg	0.0157771	GenomeWide
LG	TMEB2025:250254618	PropMg	0.0167114	GenomeWide
LG	TMEB2028:250254621	PropMg	0.0208169	GenomeWide
LG	TMEB2031:250254623	PropMg	0.0169351	GenomeWide
LG	TMEB2035:250254625	PropMg	0.0205932	GenomeWide
LG	TMEB2038:250254628	PropMg	0.0154219	GenomeWide
LG	TMEB2043:250254632	PropMg	0.0160535	GenomeWide
LG	TMEB2057:250254644	PropMg	0.0147376	GenomeWide
LG	TMEB2063:250254648	PropMg	0.0213038	GenomeWide
LG	TMEB2066:250254651	PropMg	0.0233039	GenomeWide
LG	TMEB2069:250254654	PropMg	0.0169614	GenomeWide
LG	TMEB2070:250254655	PropMg	0.0301332	GenomeWide
LG	TMEB2072:250254658	PropMg	0.016093	GenomeWide
LG	TMEB2074:250254660	PropMg	0.0211195	GenomeWide
LG	TMEB2076:250254662	PropMg	0.0313043	GenomeWide
LG	TMEB2078:250254664	PropMg	0.0205537	GenomeWide
LG	TMEB2080:250254665	PropMg	0.0212774	GenomeWide
LG	TMEB2082:250254667	PropMg	0.0154745	GenomeWide
LG	TMEB2084:250254669	PropMg	0.0164351	GenomeWide
LG	TMEB2088:250254672	PropMg	0.017093	GenomeWide
LG	TMEB2093:250254677	PropMg	0.0211853	GenomeWide
LG	TMEB2095:250254678	PropMg	0.014685	GenomeWide
LG	TMEB2099:250254682	PropMg	0.0586083	GenomeWide
LG	TMEB2101:250254684	PropMg	0.0171588	GenomeWide
LG	TMEB2103:250254686	PropMg	0.0158561	GenomeWide
LG	TMEB2105:250254688	PropMg	0.0313832	GenomeWide
LG	TMEB2107:250254690	PropMg	0.0278567	GenomeWide
LG	TMEB2109:250254692	PropMg	0.0427523	GenomeWide
LG	TMEB2110:250254694	PropMg	0.0276067	GenomeWide
LG	TMEB2112:250254696	PropMg	0.0768856	GenomeWide
LG	TMEB2118:250254699	PropMg	0.0173957	GenomeWide
LG	TMEB2121:250254701	PropMg	0.0165272	GenomeWide
LG	TMEB391:250253851	PropMg	0.0160798	GenomeWide
LG	TMEB793:250254015	PropMg	0.0168167	GenomeWide
LG	UKG41_9:250304600	PropMg	0.0176457	GenomeWide
LG	TMEB115:250253665	PropMg	0.0228828	GenomeWide
LG	TMEB506:250253905	PropMg	0.0165403	GenomeWide
LG	I920326:250090768	PropMg	0.0168693	GenomeWide
LG	I9102324:250399839	PropMg	0.0730696	GenomeWide
LG	I4_2_1425:250304632	PropMg	0.0762014	GenomeWide
LG	BANGWEULU:250304615	PropMg	0.0159877	GenomeWide
LG	MVUAMA:250304607	PropMg	0.065385	GenomeWide
LG	KALESO:250304590	PropMg	0.12048	GenomeWide
LG	TMEB813:250254016	PropMg	0.0170009	GenomeWide
LG	TMEB1765:250254421	PropMg	0.0154482	GenomeWide
LG	TMEB1805:250254442	PropMg	0.0332386	GenomeWide
LG	I974045:250090797	PropMg	0.0314227	GenomeWide
LG	TMEB977:250254051	PropMg	0.0153429	GenomeWide
LG	TMEB1006:250254067	PropMg	0.0185404	GenomeWide
LG	TMEB1670:250254402	PropMg	0.0153824	GenomeWide
LG	TMEB1798:250254438	PropMg	0.0294752	GenomeWide
LG	TMEB1945:250254548	PropMg	0.016593	GenomeWide
LG	TMEB1951:250254551	PropMg	0.0166719	GenomeWide
LG	TMEB1996:250254566	PropMg	0.0166982	GenomeWide
LG	TMEB2001:250254569	PropMg	0.0164351	GenomeWide
LG	TMEB2007:250254573	PropMg	0.0145271	GenomeWide
LG	TMEB2019:250254613	PropMg	0.0217248	GenomeWide
LG	TMEB2027:250254620	PropMg	0.0205537	GenomeWide
LG	TMEB2030:250254622	PropMg	0.0298174	GenomeWide
LG	TMEB2037:250254627	PropMg	0.015764	GenomeWide
LG	TMEB2039:250254629	PropMg	0.017672	GenomeWide
LG	TMEB2041:250254631	PropMg	0.0165535	GenomeWide
LG	TMEB2044:250254633	PropMg	0.0156192	GenomeWide
LG	TMEB2045:250254634	PropMg	0.0170272	GenomeWide
LG	TMEB2047:250254635	PropMg	0.0170009	GenomeWide
LG	TMEB2048:250254636	PropMg	0.022817	GenomeWide
LG	I972205:250301855	PropMg	0.078662	GenomeWide
LG	TMEB2054:250254641	PropMg	0.0302779	GenomeWide
LG	TMEB2056:250254643	PropMg	0.0285015	GenomeWide
LG	TMEB2058:250254645	PropMg	0.0146718	GenomeWide
LG	TMEB2059:250254646	PropMg	0.0148166	GenomeWide
LG	I961632:250300546	PropMg	0.0630428	GenomeWide
LG	TMEB2060:250254647	PropMg	0.016843	GenomeWide
LG	TMEB2065:250254650	PropMg	0.027962	GenomeWide
LG	TMEB2067:250254652	PropMg	0.0301595	GenomeWide
LG	TMEB2071:250254656	PropMg	0.0302911	GenomeWide
LG	TMEB2073:250254659	PropMg	0.0301726	GenomeWide
LG	TMEB2087:250254671	PropMg	0.0304358	GenomeWide
LG	TMEB2090:250254675	PropMg	0.0419101	GenomeWide
LG	TMEB2097:250254680	PropMg	0.0168167	GenomeWide
LG	TMEB2122:250254702	PropMg	0.0246987	GenomeWide
LG	TMEB2123:250254703	PropMg	0.0771356	GenomeWide
LG	TMEB1986:250254561	PropMg	0.0151455	GenomeWide
LG	ANG14:250254501	PropMg	0.0166982	GenomeWide
LG	ANG18:250253761	PropMg	0.0177509	GenomeWide
LG	B_BLILKP:250254110	PropMg	0.0440155	GenomeWide
LG	96_1444:250254674	PropMg	0.0174746	GenomeWide
LG	I980581:250300439	PropMg	0.0572662	GenomeWide
LG	ISSIANG:250253985	PropMg	0.017593	GenomeWide
LG	MAUNJILI:250254406	PropMg	0.0185668	GenomeWide
LG	MBOMA:250253863	PropMg	0.0210274	GenomeWide
LG	MESES:250254181	PropMg	0.0226986	GenomeWide
LG	TMEB1081:250254126	PropMg	0.0489236	GenomeWide
LG	TMEB525:250253903	PropMg	0.0156587	GenomeWide
LG	TMEB1168:250254141	PropMg	0.0158298	GenomeWide
LG	MBOM_9:250254640	PropMg	0.0338834	GenomeWide
LG	88713:250254558	PropMg	0.0196063	GenomeWide
LG	P8_P2B2:250254316	PropMg	0.0159219	GenomeWide
LG	L9_304_614:250254131	PropMg	0.0177641	GenomeWide
LG	MBOMA11:250254039	PropMg	0.0178299	GenomeWide
NR	AR124:250107818	PropMg	0.0218827	GenomeWide
NR	AR1410:250399917	PropMg	0.0563188	GenomeWide
NR	AR144:250107805	PropMg	0.0468709	GenomeWide
NR	AR155:250134515	PropMg	0.0166982	GenomeWide
NR	AR182:250134520	PropMg	0.0150534	GenomeWide
NR	AR311:250134529	PropMg	0.0166325	GenomeWide
NR	AR3913:250134481	PropMg	0.048871	GenomeWide
NR	AR945:250107873	PropMg	0.0558977	GenomeWide
NR	AR95:250107813	PropMg	0.0545292	GenomeWide
NR	COB1103:250107963	PropMg	0.0683457	GenomeWide
NR	COB1139:250107922	PropMg	0.0219354	GenomeWide
NR	COB1163:250107931	PropMg	0.0563582	GenomeWide
NR	COB4100:250107907	PropMg	0.0469104	GenomeWide
NR	COB427:250107965	PropMg	0.0372125	GenomeWide
NR	COB452:250107909	PropMg	0.048042	GenomeWide
NR	COB474:250107927	PropMg	0.0643587	GenomeWide
NR	COB475:250107987	PropMg	0.0770041	GenomeWide
NR	COB477:250107933	PropMg	0.0268567	GenomeWide
NR	COB479:250107962	PropMg	0.0777015	GenomeWide
NR	COB5104:250107932	PropMg	0.0737539	GenomeWide
NR	COB511:250399801	PropMg	0.0647139	GenomeWide
NR	COB512:250399908	PropMg	0.0646876	GenomeWide
NR	COB517:250107949	PropMg	0.0777409	GenomeWide
NR	COB524:250399896	PropMg	0.0649376	GenomeWide
NR	COB528:250107939	PropMg	0.0722406	GenomeWide
NR	COB536:250134468	PropMg	0.0732407	GenomeWide
NR	COB54:250107982	PropMg	0.0745039	GenomeWide
NR	COB544:250399903	PropMg	0.0352782	GenomeWide
NR	COB548:250399911	PropMg	0.0649639	GenomeWide
NR	COB553:250399902	PropMg	0.0737539	GenomeWide
NR	COB557:250107999	PropMg	0.0561082	GenomeWide
NR	COB561:250107915	PropMg	0.0548582	GenomeWide
NR	COB61:250108001	PropMg	0.0392521	GenomeWide
NR	COB619:250107990	PropMg	0.0472262	GenomeWide
NR	COB631:250107921	PropMg	0.0873862	GenomeWide
NR	COB641:250107985	PropMg	0.0358308	GenomeWide
NR	COB7180:250107993	PropMg	0.039331	GenomeWide
NR	COB7197:250107956	PropMg	0.0257119	GenomeWide
NR	COB725:250108000	PropMg	0.0543844	GenomeWide
NR	CR14B218:250107870	PropMg	0.0765961	GenomeWide
NR	CR14B67:250399914	PropMg	0.0169483	GenomeWide
NR	CR15B3:250107844	PropMg	0.0212774	GenomeWide
NR	CR15B4:250399907	PropMg	0.0164088	GenomeWide
NR	CR15B62:250107793	PropMg	0.0226591	GenomeWide
NR	CR15B7:250107830	PropMg	0.0169351	GenomeWide
NR	CR20A2:250107867	PropMg	0.034436	GenomeWide
NR	CR247:250134593	PropMg	0.0359098	GenomeWide
NR	CR249:250134541	PropMg	0.0766882	GenomeWide
NR	CR346:250399891	PropMg	0.0575688	GenomeWide
NR	CR3510:250399890	PropMg	0.0575293	GenomeWide
NR	CR3514:250134465	PropMg	0.0564372	GenomeWide
NR	CR362:250134532	PropMg	0.0173825	GenomeWide
NR	CR3913:250399906	PropMg	0.0486868	GenomeWide
NR	CR417:250134535	PropMg	0.0181325	GenomeWide
NR	CR424:250134508	PropMg	0.0158298	GenomeWide
NR	CR446:250134467	PropMg	0.0193694	GenomeWide
NR	CR4510:250134460	PropMg	0.0162114	GenomeWide
NR	CR492:250134476	PropMg	0.0221985	GenomeWide
NR	CR52A2:250134482	PropMg	0.0158561	GenomeWide
NR	CR52A26:250134519	PropMg	0.056424	GenomeWide
NR	CR52A31:250134530	PropMg	0.0157377	GenomeWide
NR	CR52A37:250134452	PropMg	0.0561214	GenomeWide
NR	CR52A4:250134509	PropMg	0.0358572	GenomeWide
NR	CR52A6:250134466	PropMg	0.018251	GenomeWide
NR	CR533:250134489	PropMg	0.0163166	GenomeWide
NR	CR594:250134544	PropMg	0.015935	GenomeWide
NR	CR60B10:250134512	PropMg	0.0161061	GenomeWide
NR	CR8A22:250399905	PropMg	0.045805	GenomeWide
NR	CW45036:250107868	PropMg	0.0259882	GenomeWide
NR	CW45046:250107796	PropMg	0.0570162	GenomeWide
NR	CW45072:250107871	PropMg	0.0557661	GenomeWide
NR	CW45133:250107872	PropMg	0.0250013	GenomeWide
NR	CW45180:250107866	PropMg	0.0365809	GenomeWide
NR	CW45617:250107782	PropMg	0.0171456	GenomeWide
NR	CW4823:250107826	PropMg	0.0205011	GenomeWide
NR	CW48515:250399889	PropMg	0.0167772	GenomeWide
NR	CW5251:250134472	PropMg	0.0643718	GenomeWide
NR	TMS000203:250134506	PropMg	0.0552661	GenomeWide
NR	TMS000338:250134525	PropMg	0.072438	GenomeWide
NR	TMS000346:250134474	PropMg	0.0557398	GenomeWide
NR	TMS000354:250134451	PropMg	0.0221854	GenomeWide
NR	TMS000364:250134538	PropMg	0.0564503	GenomeWide
NR	TMS000388:250134473	PropMg	0.0729907	GenomeWide
NR	TMS010034:250134527	PropMg	0.0563977	GenomeWide
NR	TMS010040:250107945	PropMg	0.0178957	GenomeWide
NR	TMS010046:250107911	PropMg	0.0476604	GenomeWide
NR	TMS010085:250107947	PropMg	0.0678325	GenomeWide
NR	TMS010090:250107946	PropMg	0.0410022	GenomeWide
NR	TMS010098:250107948	PropMg	0.0160008	GenomeWide
NR	TMS010103:250107914	PropMg	0.0432786	GenomeWide
NR	TMS010128:250399904	PropMg	0.0179615	GenomeWide
NR	TMS010131:250107953	PropMg	0.0330544	GenomeWide
NR	TMS010134:250134457	PropMg	0.0167904	GenomeWide
NR	TMS010169:250107913	PropMg	0.055424	GenomeWide
NR	TMS011086:250107973	PropMg	0.0550292	GenomeWide
NR	TMS011097:250107912	PropMg	0.0557398	GenomeWide
NR	TMS011206:250134484	PropMg	0.0303042	GenomeWide
NR	TMS011368:250134617	PropMg	0.0436602	GenomeWide
NR	TMS011371:250134517	PropMg	0.0679904	GenomeWide
NR	TMS011412:250134531	PropMg	0.0540028	GenomeWide
NR	TMS011663:250134491	PropMg	0.0181194	GenomeWide
NR	TMS011731:250134498	PropMg	0.0575425	GenomeWide
NR	TMS011797:250134493	PropMg	0.0159745	GenomeWide
NR	TMS011807:250134495	PropMg	0.0720169	GenomeWide
NR	TMS050024:250107934	PropMg	0.0205932	GenomeWide
NR	TMS050100:250134601	PropMg	0.0159877	GenomeWide
NR	TMS050125:250107971	PropMg	0.0787541	GenomeWide
NR	TMS050127:250399899	PropMg	0.0508316	GenomeWide
NR	TMS050128:250399901	PropMg	0.017422	GenomeWide
NR	TMS050186:250107920	PropMg	0.02083	GenomeWide
NR	TMS050231:250107998	PropMg	0.0628323	GenomeWide
NR	TMS050251:250107978	PropMg	0.0599374	GenomeWide
NR	TMS050286:250107924	PropMg	0.0596479	GenomeWide
NR	TMS050303:250399895	PropMg	0.0347255	GenomeWide
NR	TMS050311:250107951	PropMg	0.0189615	GenomeWide
NR	TMS050327:250107925	PropMg	0.0614638	GenomeWide
NR	TMS050473:250134585	PropMg	0.0292384	GenomeWide
NR	TMS050540:250107961	PropMg	0.0601216	GenomeWide
NR	TMS050741:250107950	PropMg	0.0298832	GenomeWide
NR	TMS050751:250134513	PropMg	0.0174878	GenomeWide
NR	TMS050752:250107969	PropMg	0.0182115	GenomeWide
NR	TMS050998:250134480	PropMg	0.0163035	GenomeWide
NR	TMS051553:250107972	PropMg	0.0359098	GenomeWide
NR	TMS051570:250107964	PropMg	0.0220933	GenomeWide
NR	TMS051599:250107944	PropMg	0.0373704	GenomeWide
NR	TMS051600:250399892	PropMg	0.0186852	GenomeWide
NR	TMS051601:250107968	PropMg	0.0310148	GenomeWide
NR	TMS051625:250134479	PropMg	0.0177246	GenomeWide
NR	TMS051626:250107943	PropMg	0.0178957	GenomeWide
NR	TMS051631:250107989	PropMg	0.0813859	GenomeWide
NR	TMS051636:250134536	PropMg	0.0178167	GenomeWide
NR	TMS051646:250134511	PropMg	0.0527791	GenomeWide
NR	TMS051652:250107919	PropMg	0.0258303	GenomeWide
NR	TMS051653:250399893	PropMg	0.0286989	GenomeWide
NR	TMS051654:250134514	PropMg	0.0182773	GenomeWide
NR	TMS051658:250399910	PropMg	0.0182641	GenomeWide
NR	TMS051662:250399909	PropMg	0.019001	GenomeWide
NR	TMS051740:250107967	PropMg	0.0625428	GenomeWide
NR	TMS051814:250107960	PropMg	0.016843	GenomeWide
NR	TMS061771:250107906	PropMg	0.0168956	GenomeWide
NR	TMS062426:250134507	PropMg	0.0170009	GenomeWide
NR	TMS070099:250134609	PropMg	0.0158035	GenomeWide
NR	TMS070352:250134524	PropMg	0.0294621	GenomeWide
NR	TMS070481:250107935	PropMg	0.0454498	GenomeWide
NR	TMS070489:250107955	PropMg	0.0245013	GenomeWide
NR	TMS070525:250107917	PropMg	0.0477394	GenomeWide
NR	TMS070553:250134503	PropMg	0.0333175	GenomeWide
NR	TMS070576:250107923	PropMg	0.018251	GenomeWide
NR	TMS070614:250107970	PropMg	0.0165403	GenomeWide
NR	TMS070620:250107984	PropMg	0.047542	GenomeWide
NR	TMS070632:250134577	PropMg	0.0303305	GenomeWide
NR	TMS070649:250107957	PropMg	0.0452129	GenomeWide
NR	TMS070675:250107975	PropMg	0.0493842	GenomeWide
NR	TMS070749:250107986	PropMg	0.0199089	GenomeWide
NR	TMS070756:250134483	PropMg	0.0359887	GenomeWide
NR	TMS070808:250107992	PropMg	0.0450813	GenomeWide
NR	TMS070824:250107910	PropMg	0.028212	GenomeWide
NR	TMS070863:250134461	PropMg	0.0503974	GenomeWide
NR	TMS070874:250107980	PropMg	0.0785436	GenomeWide
NR	TMS070952:250107938	PropMg	0.0189484	GenomeWide
NR	TMS070962:250107929	PropMg	0.0298963	GenomeWide
NR	TMS070974:250134477	PropMg	0.0176325	GenomeWide
NR	TMS070982:250107954	PropMg	0.0243565	GenomeWide
NR	TMS30572:250107810	PropMg	0.0773462	GenomeWide
NR	TMS9102324:250134500	PropMg	0.0728459	GenomeWide
NR	TMS950211:250107979	PropMg	0.0445287	GenomeWide
NR	TMS950289:250134464	PropMg	0.0387257	GenomeWide
NR	TMS961708:250107977	PropMg	0.0688326	GenomeWide
NR	TMS980505:250107981	PropMg	0.054345	GenomeWide
NR	TMS980510:250134496	PropMg	0.015764	GenomeWide
NR	TMS982132:250134450	PropMg	0.0177641	GenomeWide
NR	TMS990240:250107926	PropMg	0.0579636	GenomeWide
NR	TMS990554:250107991	PropMg	0.0790042	GenomeWide
NR	MH950414:250134528	PropMg	0.0659903	GenomeWide
NR	MM961751:250300552	PropMg	0.0163693	GenomeWide
NR	MM96JW1:250300559	PropMg	0.0205142	GenomeWide
NR	MM975280:250399926	PropMg	0.0780962	GenomeWide
NR	MM97JW2:250300477	PropMg	0.0164877	GenomeWide
NR	NR010004:250107855	PropMg	0.057003	GenomeWide
NR	NR050028:250107845	PropMg	0.0640823	GenomeWide
NR	NR050046:250107851	PropMg	0.0622533	GenomeWide
NR	NR050052:250399897	PropMg	0.0336202	GenomeWide
NR	NR050067:250107835	PropMg	0.0566082	GenomeWide
NR	NR050100:250107858	PropMg	0.0362256	GenomeWide
NR	NR050107:250107846	PropMg	0.037173	GenomeWide
NR	NR050200:250107852	PropMg	0.064635	GenomeWide
NR	NR050266:250107847	PropMg	0.0391073	GenomeWide
NR	NR050362:250107863	PropMg	0.061648	GenomeWide
NR	NR060080:250107840	PropMg	0.024475	GenomeWide
NR	NR060117:250107802	PropMg	0.0517264	GenomeWide
NR	NR060135:250107792	PropMg	0.0361598	GenomeWide
NR	NR060169:250107790	PropMg	0.0514632	GenomeWide
NR	NR060186:250399920	PropMg	0.0512264	GenomeWide
NR	NR060189:250107841	PropMg	0.0534897	GenomeWide
NR	NR060242:250107839	PropMg	0.0628059	GenomeWide
NR	NR060246:250107838	PropMg	0.0216327	GenomeWide
NR	NR060251:250399894	PropMg	0.0307121	GenomeWide
NR	NR060333:250107787	PropMg	0.017922	GenomeWide
NR	NR070632:250134533	PropMg	0.0300805	GenomeWide
NR	NR090022:250107797	PropMg	0.055595	GenomeWide
NR	NR090026:250107780	PropMg	0.0395152	GenomeWide
NR	NR090037:250399928	PropMg	0.0582399	GenomeWide
NR	NR090040:250107781	PropMg	0.0166193	GenomeWide
NR	NR090054:250134522	PropMg	0.0544239	GenomeWide
NR	NR090068:250107806	PropMg	0.0230012	GenomeWide
NR	NR090072:250107812	PropMg	0.0524896	GenomeWide
NR	NR090074:250107798	PropMg	0.0579241	GenomeWide
NR	NR090076:250107804	PropMg	0.0278304	GenomeWide
NR	NR090077:250134537	PropMg	0.0546213	GenomeWide
NR	NR090078:250107843	PropMg	0.0430417	GenomeWide
NR	NR090080:250134523	PropMg	0.0679378	GenomeWide
NR	NR090085:250107829	PropMg	0.0552266	GenomeWide
NR	NR090115:250107785	PropMg	0.016264	GenomeWide
NR	NR090116:250107784	PropMg	0.0608848	GenomeWide
NR	NR090119:250107786	PropMg	0.0538581	GenomeWide
NR	NR090127:250107822	PropMg	0.0205142	GenomeWide
NR	NR090128:250107789	PropMg	0.0193826	GenomeWide
NR	NR090146:250107824	PropMg	0.0583978	GenomeWide
NR	NR090150:250107811	PropMg	0.0456866	GenomeWide
NR	NR090162:250107821	PropMg	0.0197774	GenomeWide
NR	NR090165:250107823	PropMg	0.0236328	GenomeWide
NR	NR090176:250107779	PropMg	0.03037	GenomeWide
NR	NR090182:250107820	PropMg	0.0288305	GenomeWide
NR	NR090187:250107783	PropMg	0.0259224	GenomeWide
NR	NR090191:250107803	PropMg	0.043226	GenomeWide
NR	NR090200:250107814	PropMg	0.0340939	GenomeWide
NR	NR090206:250107836	PropMg	0.0218564	GenomeWide
NR	NR090290:250107788	PropMg	0.0202247	GenomeWide
NR	NR090310:250107828	PropMg	0.0553582	GenomeWide
NR	NR090317:250107815	PropMg	0.0567267	GenomeWide
NR	NR100011:250163983	PropMg	0.0433049	GenomeWide
NR	NR100012:250134599	PropMg	0.0156061	GenomeWide
NR	NR100013:250134741	PropMg	0.0221327	GenomeWide
NR	NR100017:250134705	PropMg	0.060069	GenomeWide
NR	NR100018:250134501	PropMg	0.0155403	GenomeWide
NR	NR100019:250134788	PropMg	0.0567398	GenomeWide
NR	NR100022:250134739	PropMg	0.0259619	GenomeWide
NR	NR100023:250134783	PropMg	0.0156324	GenomeWide
NR	NR100024:250134715	PropMg	0.0508843	GenomeWide
NR	NR100069:250134591	PropMg	0.0426207	GenomeWide
NR	NR100070:250164011	PropMg	0.075675	GenomeWide
NR	NR100077:250399925	PropMg	0.0411206	GenomeWide
NR	NR100079:250164003	PropMg	0.017343	GenomeWide
NR	NR100094:250163987	PropMg	0.054095	GenomeWide
NR	NR100105:250134651	PropMg	0.0593452	GenomeWide
NR	NR100106:250134736	PropMg	0.0199221	GenomeWide
NR	NR100116:250134795	PropMg	0.0456603	GenomeWide
NR	NR100122:250134748	PropMg	0.0268962	GenomeWide
NR	NR100126:250134765	PropMg	0.0430023	GenomeWide
NR	NR100131:250164010	PropMg	0.0178957	GenomeWide
NR	NR100145:250134728	PropMg	0.0299621	GenomeWide
NR	NR100155:250399916	PropMg	0.017672	GenomeWide
NR	NR100156:250134762	PropMg	0.0260935	GenomeWide
NR	NR100158:250164009	PropMg	0.0531212	GenomeWide
NR	NR100168:250163985	PropMg	0.0246987	GenomeWide
NR	NR100173:250134750	PropMg	0.016764	GenomeWide
NR	NR100185:250164014	PropMg	0.0431075	GenomeWide
NR	NR100194:250164000	PropMg	0.0263698	GenomeWide
NR	NR100196:250134725	PropMg	0.0419101	GenomeWide
NR	NR100199:250134647	PropMg	0.031778	GenomeWide
NR	NR100201:250164013	PropMg	0.0443576	GenomeWide
NR	NR100216:250134760	PropMg	0.0435944	GenomeWide
NR	NR100222:250134784	PropMg	0.0386468	GenomeWide
NR	NR100224:250164012	PropMg	0.0201984	GenomeWide
NR	NR100225:250134635	PropMg	0.0637928	GenomeWide
NR	NR100226:250134709	PropMg	0.0503448	GenomeWide
NR	NR100230:250163994	PropMg	0.0188957	GenomeWide
NR	NR100233:250399923	PropMg	0.0166719	GenomeWide
NR	NR100238:250134663	PropMg	0.0181194	GenomeWide
NR	NR100242:250163996	PropMg	0.0605295	GenomeWide
NR	NR100243:250163993	PropMg	0.0785041	GenomeWide
NR	NR100248:250163989	PropMg	0.0903074	GenomeWide
NR	NR100249:250134724	PropMg	0.0221196	GenomeWide
NR	NR100252:250134774	PropMg	0.0727275	GenomeWide
NR	NR100265:250163986	PropMg	0.0522001	GenomeWide
NR	NR100268:250134734	PropMg	0.0183694	GenomeWide
NR	NR100269:250134716	PropMg	0.0509501	GenomeWide
NR	NR100273:250164007	PropMg	0.0165403	GenomeWide
NR	NR100287:250134787	PropMg	0.0672009	GenomeWide
NR	NR100290:250134763	PropMg	0.041068	GenomeWide
NR	NR100291:250134726	PropMg	0.0551476	GenomeWide
NR	NR100297:250134776	PropMg	0.0361993	GenomeWide
NR	NR100299:250164008	PropMg	0.0464761	GenomeWide
NR	NR100302:250164019	PropMg	0.0581083	GenomeWide
NR	NR100306:250134792	PropMg	0.0178825	GenomeWide
NR	NR100310:250134731	PropMg	0.042397	GenomeWide
NR	NR100312:250134755	PropMg	0.018172	GenomeWide
NR	NR100313:250134655	PropMg	0.0426601	GenomeWide
NR	NR100321:250134746	PropMg	0.0378309	GenomeWide
NR	NR100322:250134744	PropMg	0.0176062	GenomeWide
NR	NR100323:250134747	PropMg	0.0420812	GenomeWide
NR	NR100324:250134773	PropMg	0.0554108	GenomeWide
NR	NR100325:250134717	PropMg	0.0409364	GenomeWide
NR	NR100327:250134770	PropMg	0.0560161	GenomeWide
NR	NR100329:250134485	PropMg	0.0806095	GenomeWide
NR	NR100334:250164005	PropMg	0.097163	GenomeWide
NR	NR100354:250134752	PropMg	0.0377388	GenomeWide
NR	NR100357:250134627	PropMg	0.0803595	GenomeWide
NR	NR100372:250134757	PropMg	0.0652798	GenomeWide
NR	NR100375:250134791	PropMg	0.0155271	GenomeWide
NR	NR100401:250134772	PropMg	0.0172114	GenomeWide
NR	NR100408:250134754	PropMg	0.0421864	GenomeWide
NR	NR100410:250134722	PropMg	0.0361072	GenomeWide
NR	NR100411:250399922	PropMg	0.0234223	GenomeWide
NR	NR100412:250134615	PropMg	0.0492394	GenomeWide
NR	NR100414:250134794	PropMg	0.029291	GenomeWide
NR	NR100417:250163998	PropMg	0.0224354	GenomeWide
NR	NR100418:250134607	PropMg	0.0359493	GenomeWide
NR	NR100420:250134749	PropMg	0.0227512	GenomeWide
NR	NR100424:250134488	PropMg	0.0631086	GenomeWide
NR	NR100429:250134671	PropMg	0.0558714	GenomeWide
NR	NR100431:250134600	PropMg	0.0609506	GenomeWide
NR	NR100432:250134742	PropMg	0.0171851	GenomeWide
NR	NR100433:250163991	PropMg	0.018751	GenomeWide
NR	NR100435:250163984	PropMg	0.0457261	GenomeWide
NR	NR100441:250134738	PropMg	0.0651087	GenomeWide
NR	NR100449:250134758	PropMg	0.0545818	GenomeWide
NR	NR100450:250163990	PropMg	0.0207511	GenomeWide
NR	NR100451:250163999	PropMg	0.0560687	GenomeWide
NR	NR100455:250164002	PropMg	0.0197642	GenomeWide
NR	NR100462:250134796	PropMg	0.0318306	GenomeWide
NR	NR100474:250163992	PropMg	0.0157903	GenomeWide
NR	NR100486:250163997	PropMg	0.0278567	GenomeWide
NR	NR100499:250134643	PropMg	0.0442129	GenomeWide
NR	NR100501:250163988	PropMg	0.0184878	GenomeWide
NR	NR110005:250134616	PropMg	0.0470683	GenomeWide
NR	NR110009:250134603	PropMg	0.0178036	GenomeWide
NR	NR110012:250134658	PropMg	0.0172904	GenomeWide
NR	NR110014:250134638	PropMg	0.0550161	GenomeWide
NR	NR110016:250134662	PropMg	0.017093	GenomeWide
NR	NR110017:250134583	PropMg	0.0532133	GenomeWide
NR	NR110021:250134463	PropMg	0.0196984	GenomeWide
NR	NR110025:250134704	PropMg	0.0415022	GenomeWide
NR	NR110030:250134595	PropMg	0.0503184	GenomeWide
NR	NR110031:250163982	PropMg	0.0413048	GenomeWide
NR	NR110036:250134586	PropMg	0.0415285	GenomeWide
NR	NR110043:250134727	PropMg	0.063727	GenomeWide
NR	NR110044:250134798	PropMg	0.0353045	GenomeWide
NR	NR110048:250134786	PropMg	0.0638191	GenomeWide
NR	NR110052:250134626	PropMg	0.0566346	GenomeWide
NR	NR110072:250134733	PropMg	0.0403048	GenomeWide
NR	NR110078:250134711	PropMg	0.0180404	GenomeWide
NR	NR110079:250134641	PropMg	0.0161061	GenomeWide
NR	NR110080:250134710	PropMg	0.0166719	GenomeWide
NR	NR110081:250134629	PropMg	0.0643587	GenomeWide
NR	NR110083:250134640	PropMg	0.051779	GenomeWide
NR	NR110084:250134668	PropMg	0.0371467	GenomeWide
NR	NR110088:250134648	PropMg	0.0451997	GenomeWide
NR	NR110092:250134761	PropMg	0.076083	GenomeWide
NR	NR110095:250134590	PropMg	0.0408443	GenomeWide
NR	NR110104:250134455	PropMg	0.0373046	GenomeWide
NR	NR110105:250134636	PropMg	0.0367783	GenomeWide
NR	NR110106:250134611	PropMg	0.0851887	GenomeWide
NR	NR110108:250134759	PropMg	0.111756	GenomeWide
NR	NR110109:250134656	PropMg	0.0588452	GenomeWide
NR	NR110110:250134604	PropMg	0.0768461	GenomeWide
NR	NR110112:250134579	PropMg	0.0298568	GenomeWide
NR	NR110115:250134610	PropMg	0.0166061	GenomeWide
NR	NR110118:250134608	PropMg	0.0293568	GenomeWide
NR	NR110122:250134713	PropMg	0.0605163	GenomeWide
NR	NR110126:250134618	PropMg	0.0433049	GenomeWide
NR	NR110133:250134633	PropMg	0.0564372	GenomeWide
NR	NR110141:250134587	PropMg	0.0463445	GenomeWide
NR	NR110143:250134594	PropMg	0.0162509	GenomeWide
NR	NR110145:250134743	PropMg	0.0482789	GenomeWide
NR	NR110153:250134578	PropMg	0.0502	GenomeWide
NR	NR110158:250134612	PropMg	0.0572662	GenomeWide
NR	NR110159:250134486	PropMg	0.0171851	GenomeWide
NR	NR110160:250134778	PropMg	0.0587663	GenomeWide
NR	NR110165:250134470	PropMg	0.0538449	GenomeWide
NR	NR110166:250134637	PropMg	0.0366203	GenomeWide
NR	NR110167:250134620	PropMg	0.0343571	GenomeWide
NR	NR110168:250134780	PropMg	0.0345413	GenomeWide
NR	NR110171:250134580	PropMg	0.063227	GenomeWide
NR	NR110176:250134706	PropMg	0.0713327	GenomeWide
NR	NR110178:250134592	PropMg	0.0534633	GenomeWide
NR	NR110179:250134634	PropMg	0.0169746	GenomeWide
NR	NR110181:250134771	PropMg	0.0153824	GenomeWide
NR	NR110183:250134582	PropMg	0.0819912	GenomeWide
NR	NR110194:250134666	PropMg	0.051029	GenomeWide
NR	NR110212:250134605	PropMg	0.0244881	GenomeWide
NR	NR110213:250134789	PropMg	0.0384494	GenomeWide
NR	NR110214:250134793	PropMg	0.0411469	GenomeWide
NR	NR110223:250134654	PropMg	0.0380152	GenomeWide
NR	NR110232:250134645	PropMg	0.0321201	GenomeWide
NR	NR110237:250134767	PropMg	0.0441207	GenomeWide
NR	NR110238:250399918	PropMg	0.0458182	GenomeWide
NR	NR110255:250134471	PropMg	0.059911	GenomeWide
NR	NR110260:250134753	PropMg	0.0413443	GenomeWide
[truncated: 82,631 more rows]

## Sheet: TableS03
Region	Stat	Group	PropMg	PropHomMg	PropDeleterious	PropHomDeleterious
GenomeWide	Mean	LG	0.03	0.008	0.15	0.072
GenomeWide	Mean	GG	0.042	0.011	0.163	0.077
GenomeWide	Mean	NR	0.041	0.012
GenomeWide	Mean	UG	0.041	0.012
GenomeWide	Mean	C1	0.095	0.033	0.167	0.085
GenomeWide	Mean	C2	0.116	0.041
GenomeWide	Mean	C3	0.115	0.05
GenomeWide	Mean	CIAT	0.018	0.007
Chr1_25MbPlus	Mean	LG	0.103	0.019	0.124	0.049
Chr1_25MbPlus	Mean	GG	0.199	0.039	0.166	0.049
Chr1_25MbPlus	Mean	NR	0.21	0.05
Chr1_25MbPlus	Mean	UG	0.136	0.028
Chr1_25MbPlus	Mean	C1	0.234	0.081	0.181	0.078
Chr1_25MbPlus	Mean	C2	0.331	0.123
Chr1_25MbPlus	Mean	C3	0.344	0.159
Chr1_25MbPlus	Mean	CIAT	0.016	0.005
Chr4_5to25Mb	Mean	LG	0.084	0.018	0.102	0.052
Chr4_5to25Mb	Mean	GG	0.145	0.033	0.122	0.052
Chr4_5to25Mb	Mean	NR	0.107	0.024
Chr4_5to25Mb	Mean	UG	0.232	0.067
Chr4_5to25Mb	Mean	C1	0.152	0.044	0.128	0.06
Chr4_5to25Mb	Mean	C2	0.159	0.045
Chr4_5to25Mb	Mean	C3	0.126	0.042
Chr4_5to25Mb	Mean	CIAT	0.014	0.006
GenomeWide	Min	LG	0.014	0.003	0.094	0.035
GenomeWide	Min	GG	0.014	0.004	0.09	0.042
GenomeWide	Min	NR	0.015	0.004
GenomeWide	Min	UG	0.014	0.004
GenomeWide	Min	C1	0.028	0.01	0.129	0.053
GenomeWide	Min	C2	0.03	0.009
GenomeWide	Min	C3	0.031	0.011
GenomeWide	Min	CIAT	0.013	0.004
Chr1_25MbPlus	Min	LG	0.008	0	0.047	0.004
Chr1_25MbPlus	Min	GG	0.009	0.001	0.044	0.002
Chr1_25MbPlus	Min	NR	0.009	0.001
Chr1_25MbPlus	Min	UG	0.009	0.001
Chr1_25MbPlus	Min	C1	0.006	0	0.049	0.006
Chr1_25MbPlus	Min	C2	0.007	0
Chr1_25MbPlus	Min	C3	0.008	0
Chr1_25MbPlus	Min	CIAT	0.005	0.002
Chr4_5to25Mb	Min	LG	0.007	0	0.039	0.011
Chr4_5to25Mb	Min	GG	0.009	0.001	0.047	0.01
Chr4_5to25Mb	Min	NR	0.009	0
Chr4_5to25Mb	Min	UG	0.008	0.001
Chr4_5to25Mb	Min	C1	0.005	0.001	0.05	0.01
Chr4_5to25Mb	Min	C2	0.007	0
Chr4_5to25Mb	Min	C3	0.007	0.001
Chr4_5to25Mb	Min	CIAT	0.006	0.001
GenomeWide	Max	LG	0.12	0.071	0.194	0.121
GenomeWide	Max	GG	0.12	0.077	0.2	0.166
GenomeWide	Max	NR	0.113	0.081
GenomeWide	Max	UG	0.136	0.073
GenomeWide	Max	C1	0.33	0.26	0.213	0.16
GenomeWide	Max	C2	0.3	0.274
GenomeWide	Max	C3	0.273	0.203
GenomeWide	Max	CIAT	0.077	0.021
Chr1_25MbPlus	Max	LG	0.776	0.692	0.519	0.519
Chr1_25MbPlus	Max	GG	0.827	0.793	0.53	0.53
Chr1_25MbPlus	Max	NR	0.827	0.793
Chr1_25MbPlus	Max	UG	0.829	0.736
Chr1_25MbPlus	Max	C1	0.951	0.945	0.533	0.533
Chr1_25MbPlus	Max	C2	0.951	0.942
Chr1_25MbPlus	Max	C3	0.948	0.94
Chr1_25MbPlus	Max	CIAT	0.437	0.098
Chr4_5to25Mb	Max	LG	0.793	0.743	0.413	0.392
Chr4_5to25Mb	Max	GG	0.825	0.806	0.415	0.415
Chr4_5to25Mb	Max	NR	0.825	0.806
Chr4_5to25Mb	Max	UG	0.812	0.776
Chr4_5to25Mb	Max	C1	0.936	0.92	0.424	0.424
Chr4_5to25Mb	Max	C2	0.933	0.917
Chr4_5to25Mb	Max	C3	0.704	0.49
Chr4_5to25Mb	Max	CIAT	0.426	0.048

## Sheet: TableS04
Criterion	Threshold	Matrix1	Matrix2	KinshipCoefficient
LDscore	300	IDM+tagIDM	IDM	1
LDscore	300	nonIDM	IDM	0.29
LDscore	300	tagIDM	IDM	0.91
LDscore	300	nonIDM	IDM+tagIDM	0.32
LDscore	300	tagIDM	IDM+tagIDM	0.94
LDscore	300	tagIDM	nonIDM	0.41
LDscore	500	IDM+tagIDM	IDM	1
LDscore	500	nonIDM	IDM	0.31
LDscore	500	tagIDM	IDM	0.97
LDscore	500	nonIDM	IDM+tagIDM	0.3
LDscore	500	tagIDM	IDM+tagIDM	0.98
LDscore	500	tagIDM	nonIDM	0.26
LDscore	700	IDM+tagIDM	IDM	1
LDscore	700	nonIDM	IDM	0.32
LDscore	700	tagIDM	IDM	0.97
LDscore	700	nonIDM	IDM+tagIDM	0.31
LDscore	700	tagIDM	IDM+tagIDM	0.98
LDscore	700	tagIDM	nonIDM	0.23
LDscore	900	IDM+tagIDM	IDM	1
LDscore	900	nonIDM	IDM	0.32
LDscore	900	tagIDM	IDM	0.94
LDscore	900	nonIDM	IDM+tagIDM	0.31
LDscore	900	tagIDM	IDM+tagIDM	0.95
LDscore	900	tagIDM	nonIDM	0.2
LDscore	1100	IDM+tagIDM	IDM	1
LDscore	1100	nonIDM	IDM	0.33
LDscore	1100	tagIDM	IDM	0.88
LDscore	1100	nonIDM	IDM+tagIDM	0.32
LDscore	1100	tagIDM	IDM+tagIDM	0.9
LDscore	1100	tagIDM	nonIDM	0.17
LDscore	1300	IDM+tagIDM	IDM	1
LDscore	1300	nonIDM	IDM	0.34
LDscore	1300	tagIDM	IDM	0.87
LDscore	1300	nonIDM	IDM+tagIDM	0.33
LDscore	1300	tagIDM	IDM+tagIDM	0.89
LDscore	1300	tagIDM	nonIDM	0.17
LDscore	1500	IDM+tagIDM	IDM	1
LDscore	1500	nonIDM	IDM	0.35
LDscore	1500	tagIDM	IDM	0.87
LDscore	1500	nonIDM	IDM+tagIDM	0.34
LDscore	1500	tagIDM	IDM+tagIDM	0.88
LDscore	1500	tagIDM	nonIDM	0.17
maxLD	0.1	IDM+tagIDM	IDM	0.63
maxLD	0.1	nonIDM	IDM	0.17
maxLD	0.1	tagIDM	IDM	0.37
maxLD	0.1	nonIDM	IDM+tagIDM	0.55
maxLD	0.1	tagIDM	IDM+tagIDM	0.95
maxLD	0.1	tagIDM	nonIDM	0.6
maxLD	0.3	IDM+tagIDM	IDM	0.74
maxLD	0.3	nonIDM	IDM	0.28
maxLD	0.3	tagIDM	IDM	0.4
maxLD	0.3	nonIDM	IDM+tagIDM	0.79
maxLD	0.3	tagIDM	IDM+tagIDM	0.92
maxLD	0.3	tagIDM	nonIDM	0.9
maxLD	0.5	IDM+tagIDM	IDM	0.87
maxLD	0.5	nonIDM	IDM	0.3
maxLD	0.5	tagIDM	IDM	0.46
maxLD	0.5	nonIDM	IDM+tagIDM	0.69
maxLD	0.5	tagIDM	IDM+tagIDM	0.84
maxLD	0.5	tagIDM	nonIDM	0.89
maxLD	0.7	IDM+tagIDM	IDM	0.94
maxLD	0.7	nonIDM	IDM	0.31
maxLD	0.7	tagIDM	IDM	0.53
maxLD	0.7	nonIDM	IDM+tagIDM	0.56
maxLD	0.7	tagIDM	IDM+tagIDM	0.78
maxLD	0.7	tagIDM	nonIDM	0.85
maxLD	0.9	IDM+tagIDM	IDM	0.99
maxLD	0.9	nonIDM	IDM	0.34
maxLD	0.9	tagIDM	IDM	0.69
maxLD	0.9	nonIDM	IDM+tagIDM	0.41
maxLD	0.9	tagIDM	IDM+tagIDM	0.76
maxLD	0.9	tagIDM	nonIDM	0.77
None		nonIDM	IDM	0.37

## Sheet: TableS05
Trait	LOCATION	YEAR.HARVESTED	LOC.YEAR	LOC.YEAR.TRIAL	TRIAL.TYPE	Nobs	Nclone	Nrep	ObsToCloneRatio	INSTITUTE
MCMDS	IBA	2001	IBA_2001	IBA_2001_00&01GGAINIB+RVA combined	GeneticGain	794	211	2	3.76303	IITA
MCMDS	IBA	2006	IBA_2006	IBA_2006_05ggainIB	GeneticGain	843	381	2	2.2126	IITA
MCMDS	IBA	2007	IBA_2007	IBA_2007_06ggainIB	GeneticGain	859	387	2	2.21964	IITA
MCMDS	IBA	2012	IBA_2012	IBA_2012_11ggainIB	GeneticGain	693	630	1	1.1	IITA
MCMDS	IBA	2014	IBA_2014	IBA_2014_2013.GG.IBA.harvest+preharvest	GeneticGain	715	661	1	1.08169	IITA
MCMDS	IBA	2006	IBA_2006	IBA_2006_LOCGERM.2005.IBA	LocalGermplasm	738	655	1	1.12672	IITA
MCMDS	IBA	2007	IBA_2007	IBA_2007_LOCGERM.2006.IBA	LocalGermplasm	672	627	1	1.07177	IITA
MCMDS	IBA	2013	IBA_2013	IBA_2013_LOCGERM.2012.IBA	LocalGermplasm	576	575	1	1.00174	IITA
MCMDS	IBA	2000	IBA_2000	IBA_2000_LOCGERM.1999.IBA	LocalGermplasm	278	241	1	1.15353	IITA
MCMDS	MOK	2006	MOK_2006	MOK_2006_05ggainMK	GeneticGain	631	308	2	2.0487	IITA
MCMDS	MOK	2007	MOK_2007	MOK_2007_06ggainMK	GeneticGain	694	320	2	2.16875	IITA
MCMDS	MOK	2008	MOK_2008	MOK_2008_07ggainMK	GeneticGain	813	368	2	2.20924	IITA
MCMDS	MOK	2011	MOK_2011	MOK_2011_10ggainMK	GeneticGain	583	553	1	1.05425	IITA
MCMDS	MOK	2003	MOK_2003	MOK_2003_LOCGERM.2002.MOK	LocalGermplasm	304	295	1	1.03051	IITA
MCMDS	MOK	2005	MOK_2005	MOK_2005_LOCGERM.2004.MOK	LocalGermplasm	283	239	1	1.1841	IITA
MCMDS	UBJ	2006	UBJ_2006	UBJ_2006_05ggainUB	GeneticGain	747	381	2	1.96063	IITA
MCMDS	UBJ	2007	UBJ_2007	UBJ_2007_06ggainUB	GeneticGain	825	412	2	2.00243	IITA
MCMDS	UBJ	2008	UBJ_2008	UBJ_2008_07ggainUB	GeneticGain	923	446	2	2.06951	IITA
MCMDS	UBJ	2009	UBJ_2009	UBJ_2009_08GgainUB	GeneticGain	554	532	1	1.04135	IITA
MCMDS	UBJ	2010	UBJ_2010	UBJ_2010_09ggainUB	GeneticGain	632	593	1	1.06577	IITA
MCMDS	UBJ	2011	UBJ_2011	UBJ_2011_10ggainUB	GeneticGain	1285	620	2	2.07258	IITA
MCMDS	UBJ	2013	UBJ_2013	UBJ_2013_2012.GG.UBJ	GeneticGain	1424	666	2	2.13814	IITA
MCMDS	UBJ	2015	UBJ_2015	UBJ_2015_2014.GG.UBJ_preharvest_harvest data	GeneticGain	715	669	1	1.06876	IITA
MCMDS	UBJ	2001	UBJ_2001	UBJ_2001_LOCGERM.2000.UBJ	LocalGermplasm	323	270	1	1.1963	IITA
MCMDS	UBJ	2002	UBJ_2002	UBJ_2002_LOCGERM.2001.UBJ	LocalGermplasm	359	299	1	1.20067	IITA
MCMDS	UBJ	2003	UBJ_2003	UBJ_2003_LOCGERM.2002.UBJ	LocalGermplasm	546	464	1	1.17672	IITA
MCMDS	UBJ	2004	UBJ_2004	UBJ_2004_LOCGERM.2003.UBJ	LocalGermplasm	599	518	1	1.15637	IITA
MCMDS	UBJ	2005	UBJ_2005	UBJ_2005_LOCGERM.2004.UBJ	LocalGermplasm	611	580	1	1.05345	IITA
MCMDS	UBJ	2006	UBJ_2006	UBJ_2006_LOCGERM.2005.UBJ	LocalGermplasm	618	583	1	1.06003	IITA
MCMDS	UBJ	2007	UBJ_2007	UBJ_2007_LOCGERM.2006.UBJ	LocalGermplasm	669	627	1	1.06699	IITA
MCMDS	UBJ	2010	UBJ_2010	UBJ_2010_LOCGERM.2009.UBJ	LocalGermplasm	823	791	1	1.04046	IITA
MCMDS	UBJ	2013	UBJ_2013	UBJ_2013_LOCGERM.2012.UBJ	LocalGermplasm	828	827	1	1.00121	IITA
MCMDS	UBJ	2014	UBJ_2014	UBJ_2014_LOCGERM.2013.UBJ	LocalGermplasm	881	836	1	1.05383	IITA
MCMDS	UBJ	2015	UBJ_2015	UBJ_2015_LOCGERM.2014.UBJ	LocalGermplasm	842	809	1	1.04079	IITA
MCMDS	UBJ	2016	UBJ_2016	UBJ_2016_LOCGERM.2015.UBJ	LocalGermplasm	824	796	1	1.03518	IITA
MCMDS	ZAR	2006	ZAR_2006	ZAR_2006_05ggainZA	GeneticGain	513	250	2	2.052	IITA
MCMDS	ZAR	2007	ZAR_2007	ZAR_2007_06ggainZA	GeneticGain	594	283	2	2.09894	IITA
MCMDS	ZAR	2008	ZAR_2008	ZAR_2008_07ggainZA	GeneticGain	658	310	2	2.12258	IITA
MCMDS	MAL	2007	MAL_2007	MAL_2007_06ggainMM	GeneticGain	529	257	2	2.05837	IITA
MCMDS	MAL	2006	MAL_2006	MAL_2006_LOCGERM.2005.MAL	LocalGermplasm	167	159	1	1.05031	IITA
MCMDS	ONNE	2007	ONNE_2007	ONNE_2007_06ggainON	GeneticGain	301	284	1	1.05986	IITA
MCMDS	ONNE	2008	ONNE_2008	ONNE_2008_07ggainON	GeneticGain	876	434	2	2.01843	IITA
MCBBS	IBA	2001	IBA_2001	IBA_2001_00&01GGAINIB+RVA combined	GeneticGain	793	211	2	3.75829	IITA
MCBBS	IBA	2006	IBA_2006	IBA_2006_05ggainIB	GeneticGain	832	381	2	2.18373	IITA
MCBBS	IBA	2007	IBA_2007	IBA_2007_06ggainIB	GeneticGain	857	387	2	2.21447	IITA
MCBBS	IBA	2012	IBA_2012	IBA_2012_11ggainIB	GeneticGain	692	630	1	1.09841	IITA
MCBBS	IBA	2014	IBA_2014	IBA_2014_2013.GG.IBA.harvest+preharvest	GeneticGain	714	660	1	1.08182	IITA
MCBBS	IBA	2006	IBA_2006	IBA_2006_LOCGERM.2005.IBA	LocalGermplasm	700	645	1	1.08527	IITA
MCBBS	IBA	2007	IBA_2007	IBA_2007_LOCGERM.2006.IBA	LocalGermplasm	660	617	1	1.06969	IITA
MCBBS	IBA	2013	IBA_2013	IBA_2013_LOCGERM.2012.IBA	LocalGermplasm	552	551	1	1.00181	IITA
MCBBS	IBA	2000	IBA_2000	IBA_2000_LOCGERM.1999.IBA	LocalGermplasm	278	241	1	1.15353	IITA
MCBBS	MOK	2006	MOK_2006	MOK_2006_05ggainMK	GeneticGain	631	308	2	2.0487	IITA
MCBBS	MOK	2007	MOK_2007	MOK_2007_06ggainMK	GeneticGain	694	320	2	2.16875	IITA
MCBBS	MOK	2008	MOK_2008	MOK_2008_07ggainMK	GeneticGain	813	368	2	2.20924	IITA
MCBBS	MOK	2011	MOK_2011	MOK_2011_10ggainMK	GeneticGain	583	553	1	1.05425	IITA
MCBBS	MOK	2003	MOK_2003	MOK_2003_LOCGERM.2002.MOK	LocalGermplasm	304	295	1	1.03051	IITA
MCBBS	MOK	2005	MOK_2005	MOK_2005_LOCGERM.2004.MOK	LocalGermplasm	282	238	1	1.18487	IITA
MCBBS	UBJ	2006	UBJ_2006	UBJ_2006_05ggainUB	GeneticGain	744	381	2	1.95276	IITA
MCBBS	UBJ	2007	UBJ_2007	UBJ_2007_06ggainUB	GeneticGain	824	412	2	2	IITA
MCBBS	UBJ	2008	UBJ_2008	UBJ_2008_07ggainUB	GeneticGain	923	446	2	2.06951	IITA
MCBBS	UBJ	2009	UBJ_2009	UBJ_2009_08GgainUB	GeneticGain	554	532	1	1.04135	IITA
MCBBS	UBJ	2010	UBJ_2010	UBJ_2010_09ggainUB	GeneticGain	632	593	1	1.06577	IITA
MCBBS	UBJ	2011	UBJ_2011	UBJ_2011_10ggainUB	GeneticGain	1284	620	2	2.07097	IITA
MCBBS	UBJ	2013	UBJ_2013	UBJ_2013_2012.GG.UBJ	GeneticGain	1423	666	2	2.13664	IITA
MCBBS	UBJ	2015	UBJ_2015	UBJ_2015_2014.GG.UBJ_preharvest_harvest data	GeneticGain	715	669	1	1.06876	IITA
MCBBS	UBJ	2001	UBJ_2001	UBJ_2001_LOCGERM.2000.UBJ	LocalGermplasm	323	270	1	1.1963	IITA
MCBBS	UBJ	2002	UBJ_2002	UBJ_2002_LOCGERM.2001.UBJ	LocalGermplasm	357	299	1	1.19398	IITA
MCBBS	UBJ	2003	UBJ_2003	UBJ_2003_LOCGERM.2002.UBJ	LocalGermplasm	545	464	1	1.17457	IITA
MCBBS	UBJ	2004	UBJ_2004	UBJ_2004_LOCGERM.2003.UBJ	LocalGermplasm	597	517	1	1.15474	IITA
MCBBS	UBJ	2005	UBJ_2005	UBJ_2005_LOCGERM.2004.UBJ	LocalGermplasm	611	580	1	1.05345	IITA
MCBBS	UBJ	2006	UBJ_2006	UBJ_2006_LOCGERM.2005.UBJ	LocalGermplasm	618	583	1	1.06003	IITA
MCBBS	UBJ	2007	UBJ_2007	UBJ_2007_LOCGERM.2006.UBJ	LocalGermplasm	667	627	1	1.0638	IITA
MCBBS	UBJ	2010	UBJ_2010	UBJ_2010_LOCGERM.2009.UBJ	LocalGermplasm	821	789	1	1.04056	IITA
MCBBS	UBJ	2013	UBJ_2013	UBJ_2013_LOCGERM.2012.UBJ	LocalGermplasm	828	827	1	1.00121	IITA
MCBBS	UBJ	2014	UBJ_2014	UBJ_2014_LOCGERM.2013.UBJ	LocalGermplasm	881	836	1	1.05383	IITA
MCBBS	UBJ	2015	UBJ_2015	UBJ_2015_LOCGERM.2014.UBJ	LocalGermplasm	843	810	1	1.04074	IITA
MCBBS	UBJ	2016	UBJ_2016	UBJ_2016_LOCGERM.2015.UBJ	LocalGermplasm	824	796	1	1.03518	IITA
MCBBS	ZAR	2006	ZAR_2006	ZAR_2006_05ggainZA	GeneticGain	513	250	2	2.052	IITA
MCBBS	ZAR	2007	ZAR_2007	ZAR_2007_06ggainZA	GeneticGain	594	283	2	2.09894	IITA
MCBBS	ZAR	2008	ZAR_2008	ZAR_2008_07ggainZA	GeneticGain	658	310	2	2.12258	IITA
MCBBS	ONNE	2007	ONNE_2007	ONNE_2007_06ggainON	GeneticGain	301	284	1	1.05986	IITA
MCBBS	ONNE	2008	ONNE_2008	ONNE_2008_07ggainON	GeneticGain	873	434	2	2.01152	IITA
logRTNO	IBA	2001	IBA_2001	IBA_2001_00&01GGAINIB+RVA combined	GeneticGain	771	210	2	3.67143	IITA
logRTNO	IBA	2006	IBA_2006	IBA_2006_05ggainIB	GeneticGain	819	380	2	2.15526	IITA
logRTNO	IBA	2007	IBA_2007	IBA_2007_06ggainIB	GeneticGain	810	384	2	2.10938	IITA
logRTNO	IBA	2012	IBA_2012	IBA_2012_11ggainIB	GeneticGain	673	614	1	1.09609	IITA
logRTNO	IBA	2014	IBA_2014	IBA_2014_2013.GG.IBA.harvest+preharvest	GeneticGain	711	658	1	1.08055	IITA
logRTNO	IBA	2006	IBA_2006	IBA_2006_LOCGERM.2005.IBA	LocalGermplasm	682	608	1	1.12171	IITA
logRTNO	IBA	2007	IBA_2007	IBA_2007_LOCGERM.2006.IBA	LocalGermplasm	539	500	1	1.078	IITA
logRTNO	IBA	2000	IBA_2000	IBA_2000_LOCGERM.1999.IBA	LocalGermplasm	242	205	1	1.18049	IITA
logRTNO	MOK	2006	MOK_2006	MOK_2006_05ggainMK	GeneticGain	622	307	2	2.02606	IITA
logRTNO	MOK	2007	MOK_2007	MOK_2007_06ggainMK	GeneticGain	688	320	2	2.15	IITA
logRTNO	MOK	2008	MOK_2008	MOK_2008_07ggainMK	GeneticGain	784	364	2	2.15385	IITA
logRTNO	MOK	2011	MOK_2011	MOK_2011_10ggainMK	GeneticGain	581	551	1	1.05445	IITA
logRTNO	MOK	2003	MOK_2003	MOK_2003_LOCGERM.2002.MOK	LocalGermplasm	206	206	1	1	IITA
logRTNO	MOK	2005	MOK_2005	MOK_2005_LOCGERM.2004.MOK	LocalGermplasm	183	152	1	1.20395	IITA
logRTNO	UBJ	2006	UBJ_2006	UBJ_2006_05ggainUB	GeneticGain	726	376	2	1.93085	IITA
logRTNO	UBJ	2007	UBJ_2007	UBJ_2007_06ggainUB	GeneticGain	822	412	2	1.99515	IITA
logRTNO	UBJ	2008	UBJ_2008	UBJ_2008_07ggainUB	GeneticGain	921	446	2	2.06502	IITA
logRTNO	UBJ	2009	UBJ_2009	UBJ_2009_08GgainUB	GeneticGain	471	463	1	1.01728	IITA
logRTNO	UBJ	2010	UBJ_2010	UBJ_2010_09ggainUB	GeneticGain	624	587	1	1.06303	IITA
logRTNO	UBJ	2011	UBJ_2011	UBJ_2011_10ggainUB	GeneticGain	1269	620	2	2.04677	IITA
logRTNO	UBJ	2013	UBJ_2013	UBJ_2013_2012.GG.UBJ	GeneticGain	1323	661	2	2.00151	IITA
logRTNO	UBJ	2015	UBJ_2015	UBJ_2015_2014.GG.UBJ_preharvest_harvest data	GeneticGain	713	667	1	1.06897	IITA
logRTNO	UBJ	2001	UBJ_2001	UBJ_2001_LOCGERM.2000.UBJ	LocalGermplasm	320	267	1	1.1985	IITA
logRTNO	UBJ	2002	UBJ_2002	UBJ_2002_LOCGERM.2001.UBJ	LocalGermplasm	352	292	1	1.20548	IITA
logRTNO	UBJ	2003	UBJ_2003	UBJ_2003_LOCGERM.2002.UBJ	LocalGermplasm	511	436	1	1.17202	IITA
logRTNO	UBJ	2004	UBJ_2004	UBJ_2004_LOCGERM.2003.UBJ	LocalGermplasm	573	495	1	1.15758	IITA
logRTNO	UBJ	2005	UBJ_2005	UBJ_2005_LOCGERM.2004.UBJ	LocalGermplasm	593	562	1	1.05516	IITA
logRTNO	UBJ	2006	UBJ_2006	UBJ_2006_LOCGERM.2005.UBJ	LocalGermplasm	602	569	1	1.058	IITA
logRTNO	UBJ	2007	UBJ_2007	UBJ_2007_LOCGERM.2006.UBJ	LocalGermplasm	642	606	1	1.05941	IITA
logRTNO	UBJ	2010	UBJ_2010	UBJ_2010_LOCGERM.2009.UBJ	LocalGermplasm	800	771	1	1.03761	IITA
logRTNO	UBJ	2014	UBJ_2014	UBJ_2014_LOCGERM.2013.UBJ	LocalGermplasm	829	786	1	1.05471	IITA
logRTNO	UBJ	2015	UBJ_2015	UBJ_2015_LOCGERM.2014.UBJ	LocalGermplasm	767	735	1	1.04354	IITA
logRTNO	UBJ	2016	UBJ_2016	UBJ_2016_LOCGERM.2015.UBJ	LocalGermplasm	809	781	1	1.03585	IITA
logRTNO	ZAR	2006	ZAR_2006	ZAR_2006_05ggainZA	GeneticGain	487	244	2	1.9959	IITA
logRTNO	ZAR	2007	ZAR_2007	ZAR_2007_06ggainZA	GeneticGain	593	283	2	2.09541	IITA
logRTNO	ZAR	2008	ZAR_2008	ZAR_2008_07ggainZA	GeneticGain	653	310	2	2.10645	IITA
logRTNO	MAL	2007	MAL_2007	MAL_2007_06ggainMM	GeneticGain	343	223	2	1.53812	IITA
logRTNO	MAL	2006	MAL_2006	MAL_2006_LOCGERM.2005.MAL	LocalGermplasm	132	126	1	1.04762	IITA
logRTNO	ONNE	2007	ONNE_2007	ONNE_2007_06ggainON	GeneticGain	300	283	1	1.06007	IITA
logRTNO	ONNE	2008	ONNE_2008	ONNE_2008_07ggainON	GeneticGain	861	434	2	1.98387	IITA
logRTWT	IBA	2001	IBA_2001	IBA_2001_00&01GGAINIB+RVA combined	GeneticGain	771	210	2	3.67143	IITA
logRTWT	IBA	2006	IBA_2006	IBA_2006_05ggainIB	GeneticGain	822	380	2	2.16316	IITA
logRTWT	IBA	2007	IBA_2007	IBA_2007_06ggainIB	GeneticGain	809	384	2	2.10677	IITA
logRTWT	IBA	2012	IBA_2012	IBA_2012_11ggainIB	GeneticGain	672	613	1	1.09625	IITA
logRTWT	IBA	2014	IBA_2014	IBA_2014_2013.GG.IBA.harvest+preharvest	GeneticGain	711	658	1	1.08055	IITA
logRTWT	IBA	2006	IBA_2006	IBA_2006_LOCGERM.2005.IBA	LocalGermplasm	682	609	1	1.11987	IITA
logRTWT	IBA	2007	IBA_2007	IBA_2007_LOCGERM.2006.IBA	LocalGermplasm	539	500	1	1.078	IITA
logRTWT	IBA	2000	IBA_2000	IBA_2000_LOCGERM.1999.IBA	LocalGermplasm	242	205	1	1.18049	IITA
logRTWT	MOK	2006	MOK_2006	MOK_2006_05ggainMK	GeneticGain	622	307	2	2.02606	IITA
logRTWT	MOK	2007	MOK_2007	MOK_2007_06ggainMK	GeneticGain	688	320	2	2.15	IITA
logRTWT	MOK	2008	MOK_2008	MOK_2008_07ggainMK	GeneticGain	783	364	2	2.1511	IITA
logRTWT	MOK	2011	MOK_2011	MOK_2011_10ggainMK	GeneticGain	572	542	1	1.05535	IITA
logRTWT	MOK	2003	MOK_2003	MOK_2003_LOCGERM.2002.MOK	LocalGermplasm	206	206	1	1	IITA
logRTWT	MOK	2005	MOK_2005	MOK_2005_LOCGERM.2004.MOK	LocalGermplasm	184	153	1	1.20261	IITA
logRTWT	UBJ	2006	UBJ_2006	UBJ_2006_05ggainUB	GeneticGain	726	376	2	1.93085	IITA
logRTWT	UBJ	2007	UBJ_2007	UBJ_2007_06ggainUB	GeneticGain	822	412	2	1.99515	IITA
logRTWT	UBJ	2008	UBJ_2008	UBJ_2008_07ggainUB	GeneticGain	921	446	2	2.06502	IITA
logRTWT	UBJ	2009	UBJ_2009	UBJ_2009_08GgainUB	GeneticGain	471	463	1	1.01728	IITA
logRTWT	UBJ	2010	UBJ_2010	UBJ_2010_09ggainUB	GeneticGain	624	587	1	1.06303	IITA
logRTWT	UBJ	2011	UBJ_2011	UBJ_2011_10ggainUB	GeneticGain	1270	620	2	2.04839	IITA
logRTWT	UBJ	2013	UBJ_2013	UBJ_2013_2012.GG.UBJ	GeneticGain	1323	661	2	2.00151	IITA
logRTWT	UBJ	2015	UBJ_2015	UBJ_2015_2014.GG.UBJ_preharvest_harvest data	GeneticGain	713	667	1	1.06897	IITA
logRTWT	UBJ	2001	UBJ_2001	UBJ_2001_LOCGERM.2000.UBJ	LocalGermplasm	320	267	1	1.1985	IITA
logRTWT	UBJ	2002	UBJ_2002	UBJ_2002_LOCGERM.2001.UBJ	LocalGermplasm	352	292	1	1.20548	IITA
logRTWT	UBJ	2003	UBJ_2003	UBJ_2003_LOCGERM.2002.UBJ	LocalGermplasm	512	436	1	1.17431	IITA
logRTWT	UBJ	2004	UBJ_2004	UBJ_2004_LOCGERM.2003.UBJ	LocalGermplasm	573	495	1	1.15758	IITA
logRTWT	UBJ	2005	UBJ_2005	UBJ_2005_LOCGERM.2004.UBJ	LocalGermplasm	592	561	1	1.05526	IITA
logRTWT	UBJ	2006	UBJ_2006	UBJ_2006_LOCGERM.2005.UBJ	LocalGermplasm	601	568	1	1.0581	IITA
logRTWT	UBJ	2007	UBJ_2007	UBJ_2007_LOCGERM.2006.UBJ	LocalGermplasm	642	606	1	1.05941	IITA
logRTWT	UBJ	2010	UBJ_2010	UBJ_2010_LOCGERM.2009.UBJ	LocalGermplasm	801	772	1	1.03756	IITA
logRTWT	UBJ	2014	UBJ_2014	UBJ_2014_LOCGERM.2013.UBJ	LocalGermplasm	829	786	1	1.05471	IITA
logRTWT	UBJ	2015	UBJ_2015	UBJ_2015_LOCGERM.2014.UBJ	LocalGermplasm	763	731	1	1.04378	IITA
logRTWT	UBJ	2016	UBJ_2016	UBJ_2016_LOCGERM.2015.UBJ	LocalGermplasm	809	781	1	1.03585	IITA
logRTWT	ZAR	2006	ZAR_2006	ZAR_2006_05ggainZA	GeneticGain	487	244	2	1.9959	IITA
logRTWT	ZAR	2007	ZAR_2007	ZAR_2007_06ggainZA	GeneticGain	593	283	2	2.09541	IITA
logRTWT	ZAR	2008	ZAR_2008	ZAR_2008_07ggainZA	GeneticGain	653	310	2	2.10645	IITA
logRTWT	MAL	2007	MAL_2007	MAL_2007_06ggainMM	GeneticGain	343	223	2	1.53812	IITA
logRTWT	MAL	2006	MAL_2006	MAL_2006_LOCGERM.2005.MAL	LocalGermplasm	132	126	1	1.04762	IITA
logRTWT	ONNE	2007	ONNE_2007	ONNE_2007_06ggainON	GeneticGain	300	283	1	1.06007	IITA
logRTWT	ONNE	2008	ONNE_2008	ONNE_2008_07ggainON	GeneticGain	860	434	2	1.98157	IITA
logSHTWT	IBA	2001	IBA_2001	IBA_2001_00&01GGAINIB+RVA combined	GeneticGain	771	210	2	3.67143	IITA
logSHTWT	IBA	2006	IBA_2006	IBA_2006_05ggainIB	GeneticGain	821	380	2	2.16053	IITA
logSHTWT	IBA	2007	IBA_2007	IBA_2007_06ggainIB	GeneticGain	819	384	2	2.13281	IITA
logSHTWT	IBA	2012	IBA_2012	IBA_2012_11ggainIB	GeneticGain	682	621	1	1.09823	IITA
logSHTWT	IBA	2006	IBA_2006	IBA_2006_LOCGERM.2005.IBA	LocalGermplasm	712	634	1	1.12303	IITA
logSHTWT	IBA	2007	IBA_2007	IBA_2007_LOCGERM.2006.IBA	LocalGermplasm	591	549	1	1.0765	IITA
logSHTWT	MOK	2006	MOK_2006	MOK_2006_05ggainMK	GeneticGain	622	307	2	2.02606	IITA
logSHTWT	MOK	2007	MOK_2007	MOK_2007_06ggainMK	GeneticGain	339	315	1	1.07619	IITA
logSHTWT	MOK	2008	MOK_2008	MOK_2008_07ggainMK	GeneticGain	381	350	1	1.08857	IITA
logSHTWT	MOK	2011	MOK_2011	MOK_2011_10ggainMK	GeneticGain	581	551	1	1.05445	IITA
logSHTWT	MOK	2005	MOK_2005	MOK_2005_LOCGERM.2004.MOK	LocalGermplasm	181	151	1	1.19868	IITA
logSHTWT	UBJ	2006	UBJ_2006	UBJ_2006_05ggainUB	GeneticGain	724	377	2	1.92042	IITA
logSHTWT	UBJ	2007	UBJ_2007	UBJ_2007_06ggainUB	GeneticGain	821	412	2	1.99272	IITA
logSHTWT	UBJ	2008	UBJ_2008	UBJ_2008_07ggainUB	GeneticGain	457	433	1	1.05543	IITA
logSHTWT	UBJ	2009	UBJ_2009	UBJ_2009_08GgainUB	GeneticGain	471	463	1	1.01728	IITA
logSHTWT	UBJ	2010	UBJ_2010	UBJ_2010_09ggainUB	GeneticGain	625	588	1	1.06293	IITA
logSHTWT	UBJ	2011	UBJ_2011	UBJ_2011_10ggainUB	GeneticGain	1272	620	2	2.05161	IITA
logSHTWT	UBJ	2013	UBJ_2013	UBJ_2013_2012.GG.UBJ	GeneticGain	1326	662	2	2.00302	IITA
logSHTWT	UBJ	2015	UBJ_2015	UBJ_2015_2014.GG.UBJ_preharvest_harvest data	GeneticGain	715	669	1	1.06876	IITA
logSHTWT	UBJ	2001	UBJ_2001	UBJ_2001_LOCGERM.2000.UBJ	LocalGermplasm	321	268	1	1.19776	IITA
logSHTWT	UBJ	2002	UBJ_2002	UBJ_2002_LOCGERM.2001.UBJ	LocalGermplasm	353	293	1	1.20478	IITA
logSHTWT	UBJ	2003	UBJ_2003	UBJ_2003_LOCGERM.2002.UBJ	LocalGermplasm	521	445	1	1.17079	IITA
logSHTWT	UBJ	2004	UBJ_2004	UBJ_2004_LOCGERM.2003.UBJ	LocalGermplasm	595	515	1	1.15534	IITA
logSHTWT	UBJ	2005	UBJ_2005	UBJ_2005_LOCGERM.2004.UBJ	LocalGermplasm	606	576	1	1.05208	IITA
logSHTWT	UBJ	2006	UBJ_2006	UBJ_2006_LOCGERM.2005.UBJ	LocalGermplasm	599	566	1	1.0583	IITA
logSHTWT	UBJ	2007	UBJ_2007	UBJ_2007_LOCGERM.2006.UBJ	LocalGermplasm	659	620	1	1.0629	IITA
logSHTWT	UBJ	2010	UBJ_2010	UBJ_2010_LOCGERM.2009.UBJ	LocalGermplasm	801	773	1	1.03622	IITA
logSHTWT	UBJ	2014	UBJ_2014	UBJ_2014_LOCGERM.2013.UBJ	LocalGermplasm	833	790	1	1.05443	IITA
logSHTWT	UBJ	2015	UBJ_2015	UBJ_2015_LOCGERM.2014.UBJ	LocalGermplasm	821	788	1	1.04188	IITA
logSHTWT	UBJ	2016	UBJ_2016	UBJ_2016_LOCGERM.2015.UBJ	LocalGermplasm	812	784	1	1.03571	IITA
logSHTWT	ZAR	2006	ZAR_2006	ZAR_2006_05ggainZA	GeneticGain	251	234	1	1.07265	IITA
logSHTWT	ZAR	2007	ZAR_2007	ZAR_2007_06ggainZA	GeneticGain	293	280	1	1.04643	IITA
logSHTWT	ZAR	2008	ZAR_2008	ZAR_2008_07ggainZA	GeneticGain	654	310	2	2.10968	IITA
logSHTWT	MAL	2007	MAL_2007	MAL_2007_06ggainMM	GeneticGain	215	208	1	1.03365	IITA
logSHTWT	MAL	2006	MAL_2006	MAL_2006_LOCGERM.2005.MAL	LocalGermplasm	131	125	1	1.048	IITA
logSHTWT	ONNE	2007	ONNE_2007	ONNE_2007_06ggainON	GeneticGain	300	283	1	1.06007	IITA
logSHTWT	ONNE	2008	ONNE_2008	ONNE_2008_07ggainON	GeneticGain	432	419	1	1.03103	IITA
HI	IBA	2001	IBA_2001	IBA_2001_00&01GGAINIB+RVA combined	GeneticGain	771	210	2	3.67143	IITA
HI	IBA	2006	IBA_2006	IBA_2006_05ggainIB	GeneticGain	820	380	2	2.15789	IITA
HI	IBA	2007	IBA_2007	IBA_2007_06ggainIB	GeneticGain	809	384	2	2.10677	IITA
HI	IBA	2012	IBA_2012	IBA_2012_11ggainIB	GeneticGain	671	612	1	1.09641	IITA
HI	IBA	2006	IBA_2006	IBA_2006_LOCGERM.2005.IBA	LocalGermplasm	681	609	1	1.11823	IITA
HI	MOK	2006	MOK_2006	MOK_2006_05ggainMK	GeneticGain	622	307	2	2.02606	IITA
HI	MOK	2007	MOK_2007	MOK_2007_06ggainMK	GeneticGain	339	315	1	1.07619	IITA
HI	MOK	2008	MOK_2008	MOK_2008_07ggainMK	GeneticGain	381	350	1	1.08857	IITA
HI	MOK	2011	MOK_2011	MOK_2011_10ggainMK	GeneticGain	572	542	1	1.05535	IITA
HI	MOK	2005	MOK_2005	MOK_2005_LOCGERM.2004.MOK	LocalGermplasm	181	151	1	1.19868	IITA
HI	UBJ	2006	UBJ_2006	UBJ_2006_05ggainUB	GeneticGain	721	376	2	1.91755	IITA
HI	UBJ	2007	UBJ_2007	UBJ_2007_06ggainUB	GeneticGain	820	412	2	1.99029	IITA
HI	UBJ	2008	UBJ_2008	UBJ_2008_07ggainUB	GeneticGain	456	432	1	1.05556	IITA
HI	UBJ	2009	UBJ_2009	UBJ_2009_08GgainUB	GeneticGain	471	463	1	1.01728	IITA
HI	UBJ	2010	UBJ_2010	UBJ_2010_09ggainUB	GeneticGain	624	587	1	1.06303	IITA
HI	UBJ	2011	UBJ_2011	UBJ_2011_10ggainUB	GeneticGain	1270	620	2	2.04839	IITA
HI	UBJ	2013	UBJ_2013	UBJ_2013_2012.GG.UBJ	GeneticGain	1323	661	2	2.00151	IITA
HI	UBJ	2015	UBJ_2015	UBJ_2015_2014.GG.UBJ_preharvest_harvest data	GeneticGain	713	667	1	1.06897	IITA
HI	UBJ	2001	UBJ_2001	UBJ_2001_LOCGERM.2000.UBJ	LocalGermplasm	320	267	1	1.1985	IITA
HI	UBJ	2002	UBJ_2002	UBJ_2002_LOCGERM.2001.UBJ	LocalGermplasm	352	292	1	1.20548	IITA
HI	UBJ	2003	UBJ_2003	UBJ_2003_LOCGERM.2002.UBJ	LocalGermplasm	495	420	1	1.17857	IITA
HI	UBJ	2004	UBJ_2004	UBJ_2004_LOCGERM.2003.UBJ	LocalGermplasm	573	495	1	1.15758	IITA
HI	UBJ	2005	UBJ_2005	UBJ_2005_LOCGERM.2004.UBJ	LocalGermplasm	588	558	1	1.05376	IITA
HI	UBJ	2006	UBJ_2006	UBJ_2006_LOCGERM.2005.UBJ	LocalGermplasm	588	555	1	1.05946	IITA
HI	UBJ	2007	UBJ_2007	UBJ_2007_LOCGERM.2006.UBJ	LocalGermplasm	642	605	1	1.06116	IITA
HI	UBJ	2010	UBJ_2010	UBJ_2010_LOCGERM.2009.UBJ	LocalGermplasm	794	766	1	1.03655	IITA
HI	ZAR	2006	ZAR_2006	ZAR_2006_05ggainZA	GeneticGain	250	233	1	1.07296	IITA
HI	ZAR	2007	ZAR_2007	ZAR_2007_06ggainZA	GeneticGain	293	280	1	1.04643	IITA
HI	ZAR	2008	ZAR_2008	ZAR_2008_07ggainZA	GeneticGain	653	310	2	2.10645	IITA
HI	MAL	2007	MAL_2007	MAL_2007_06ggainMM	GeneticGain	215	208	1	1.03365	IITA
HI	MAL	2006	MAL_2006	MAL_2006_LOCGERM.2005.MAL	LocalGermplasm	131	125	1	1.048	IITA
HI	ONNE	2007	ONNE_2007	ONNE_2007_06ggainON	GeneticGain	300	283	1	1.06007	IITA
HI	ONNE	2008	ONNE_2008	ONNE_2008_07ggainON	GeneticGain	432	419	1	1.03103	IITA
DM	IBA	2001	IBA_2001	IBA_2001_00&01GGAINIB+RVA combined	GeneticGain	753	209	2	3.60287	IITA
DM	IBA	2006	IBA_2006	IBA_2006_05ggainIB	GeneticGain	750	378	2	1.98413	IITA
DM	IBA	2007	IBA_2007	IBA_2007_06ggainIB	GeneticGain	772	382	2	2.02094	IITA
DM	IBA	2012	IBA_2012	IBA_2012_11ggainIB	GeneticGain	508	487	1	1.04312	IITA
DM	IBA	2014	IBA_2014	IBA_2014_2013.GG.IBA.harvest+preharvest	GeneticGain	701	648	1	1.08179	IITA
DM	IBA	2006	IBA_2006	IBA_2006_LOCGERM.2005.IBA	LocalGermplasm	459	399	1	1.15038	IITA
DM	IBA	2007	IBA_2007	IBA_2007_LOCGERM.2006.IBA	LocalGermplasm	402	372	1	1.08065	IITA
DM	IBA	2000	IBA_2000	IBA_2000_LOCGERM.1999.IBA	LocalGermplasm	224	189	1	1.18519	IITA
DM	MOK	2006	MOK_2006	MOK_2006_05ggainMK	GeneticGain	319	295	1	1.08136	IITA
DM	MOK	2007	MOK_2007	MOK_2007_06ggainMK	GeneticGain	327	304	1	1.07566	IITA
DM	MOK	2008	MOK_2008	MOK_2008_07ggainMK	GeneticGain	356	328	1	1.08537	IITA
DM	MOK	2003	MOK_2003	MOK_2003_LOCGERM.2002.MOK	LocalGermplasm	232	231	1	1.00433	IITA
DM	MOK	2005	MOK_2005	MOK_2005_LOCGERM.2004.MOK	LocalGermplasm	167	141	1	1.1844	IITA
DM	UBJ	2006	UBJ_2006	UBJ_2006_05ggainUB	GeneticGain	371	356	1	1.04213	IITA
DM	UBJ	2007	UBJ_2007	UBJ_2007_06ggainUB	GeneticGain	397	386	1	1.0285	IITA
DM	UBJ	2008	UBJ_2008	UBJ_2008_07ggainUB	GeneticGain	421	400	1	1.0525	IITA
DM	UBJ	2009	UBJ_2009	UBJ_2009_08GgainUB	GeneticGain	471	463	1	1.01728	IITA
DM	UBJ	2010	UBJ_2010	UBJ_2010_09ggainUB	GeneticGain	625	588	1	1.06293	IITA
DM	UBJ	2015	UBJ_2015	UBJ_2015_2014.GG.UBJ_preharvest_harvest data	GeneticGain	674	631	1	1.06815	IITA
DM	UBJ	2001	UBJ_2001	UBJ_2001_LOCGERM.2000.UBJ	LocalGermplasm	319	266	1	1.19925	IITA
DM	UBJ	2002	UBJ_2002	UBJ_2002_LOCGERM.2001.UBJ	LocalGermplasm	343	285	1	1.20351	IITA
DM	UBJ	2004	UBJ_2004	UBJ_2004_LOCGERM.2003.UBJ	LocalGermplasm	563	486	1	1.15844	IITA
DM	UBJ	2005	UBJ_2005	UBJ_2005_LOCGERM.2004.UBJ	LocalGermplasm	593	562	1	1.05516	IITA
DM	UBJ	2006	UBJ_2006	UBJ_2006_LOCGERM.2005.UBJ	LocalGermplasm	601	567	1	1.05996	IITA
DM	UBJ	2007	UBJ_2007	UBJ_2007_LOCGERM.2006.UBJ	LocalGermplasm	579	548	1	1.05657	IITA
DM	UBJ	2010	UBJ_2010	UBJ_2010_LOCGERM.2009.UBJ	LocalGermplasm	750	721	1	1.04022	IITA
DM	UBJ	2014	UBJ_2014	UBJ_2014_LOCGERM.2013.UBJ	LocalGermplasm	745	704	1	1.05824	IITA
DM	UBJ	2015	UBJ_2015	UBJ_2015_LOCGERM.2014.UBJ	LocalGermplasm	614	584	1	1.05137	IITA
DM	UBJ	2016	UBJ_2016	UBJ_2016_LOCGERM.2015.UBJ	LocalGermplasm	802	774	1	1.03618	IITA
DM	ZAR	2006	ZAR_2006	ZAR_2006_05ggainZA	GeneticGain	221	212	1	1.04245	IITA
DM	ZAR	2007	ZAR_2007	ZAR_2007_06ggainZA	GeneticGain	285	272	1	1.04779	IITA
DM	MAL	2007	MAL_2007	MAL_2007_06ggainMM	GeneticGain	192	186	1	1.03226	IITA
DM	MAL	2006	MAL_2006	MAL_2006_LOCGERM.2005.MAL	LocalGermplasm	123	117	1	1.05128	IITA
DM	ONNE	2007	ONNE_2007	ONNE_2007_06ggainON	GeneticGain	293	276	1	1.06159	IITA
DM	ONNE	2008	ONNE_2008	ONNE_2008_07ggainON	GeneticGain	429	416	1	1.03125	IITA
logRTWT	umu	2012	umu:2012	tp1:umu:2012:set1		1385	472	3	2.93432	NRCRI
logRTWT	kano	2013	kano:2013	tp1:kano:2013:set1		567	223	3	2.5426	NRCRI
logRTWT	oto	2013	oto:2013	tp1:oto:2013:set1		574	227	3	2.52863	NRCRI
logRTWT	umu	2014	umu:2014	tp1:umu:2014:set1		589	230	3	2.56087	NRCRI
logRTWT	umu	2014	umu:2014	tp2:umu:2014:set4		287	107	3	2.68224	NRCRI
logRTWT	oto	2014	oto:2014	tp1:oto:2014:set1		571	219	3	2.60731	NRCRI
logRTWT	umu	2013	umu:2013	tp1:umu:2013:set1		565	226	3	2.5	NRCRI
logRTWT	umu	2013	umu:2013	tp2:umu:2013:set4		246	107	3	2.29907	NRCRI
logRTWT	kano	2014	kano:2014	tp1:kano:2014:set1		142	140	1	1.01429	NRCRI
logRTWT	umu	2013	umu:2013	tp2:umu:2013:set2		323	114	3	2.83333	NRCRI
logRTWT	umu	2014	umu:2014	tp2:umu:2014:set2		314	112	3	2.80357	NRCRI
logRTWT	kano	2014	kano:2014	tp1:kano:2014:set2		266	184	3	1.44565	NRCRI
logRTWT	umu	2014	umu:2014	tp1:umu:2014:set2		608	216	3	2.81481	NRCRI
logRTWT	kano	2013	kano:2013	tp1:kano:2013:set2		540	236	3	2.28814	NRCRI
logRTWT	oto	2014	oto:2014	tp1:oto:2014:set2		650	237	3	2.74262	NRCRI
logRTWT	umu	2014	umu:2014	tp2:umu:2014:set1		334	115	3	2.90435	NRCRI
logRTWT	umu	2014	umu:2014	tp2:umu:2014:set3		243	97	3	2.50515	NRCRI
logRTWT	umu	2013	umu:2013	tp2:umu:2013:set3		288	110	3	2.61818	NRCRI
logRTWT	umu	2013	umu:2013	tp2:umu:2013:set1		302	114	3	2.64912	NRCRI
logRTWT	oto	2013	oto:2013	tp1:oto:2013:set2		572	236	3	2.42373	NRCRI
logRTWT	umu	2013	umu:2013	tp1:umu:2013:set2		551	223	3	2.47085	NRCRI
logRTNO	umu	2012	umu:2012	tp1:umu:2012:set1		1385	472	3	2.93432	NRCRI
logRTNO	kano	2013	kano:2013	tp1:kano:2013:set1		567	223	3	2.5426	NRCRI
logRTNO	umu	2014	umu:2014	tp1:umu:2014:set1		589	230	3	2.56087	NRCRI
logRTNO	umu	2014	umu:2014	tp2:umu:2014:set4		287	107	3	2.68224	NRCRI
logRTNO	oto	2014	oto:2014	tp1:oto:2014:set1		571	219	3	2.60731	NRCRI
logRTNO	umu	2013	umu:2013	tp1:umu:2013:set1		603	227	3	2.65639	NRCRI
logRTNO	umu	2013	umu:2013	tp2:umu:2013:set4		246	107	3	2.29907	NRCRI
logRTNO	kano	2014	kano:2014	tp1:kano:2014:set1		142	140	1	1.01429	NRCRI
logRTNO	umu	2013	umu:2013	tp2:umu:2013:set2		322	114	3	2.82456	NRCRI
logRTNO	umu	2014	umu:2014	tp2:umu:2014:set2		314	112	3	2.80357	NRCRI
logRTNO	kano	2014	kano:2014	tp1:kano:2014:set2		265	184	3	1.44022	NRCRI
logRTNO	umu	2014	umu:2014	tp1:umu:2014:set2		607	216	3	2.81019	NRCRI
logRTNO	kano	2013	kano:2013	tp1:kano:2013:set2		540	236	3	2.28814	NRCRI
logRTNO	oto	2014	oto:2014	tp1:oto:2014:set2		649	237	3	2.7384	NRCRI
logRTNO	umu	2014	umu:2014	tp2:umu:2014:set1		337	116	3	2.90517	NRCRI
logRTNO	umu	2014	umu:2014	tp2:umu:2014:set3		242	97	3	2.49485	NRCRI
logRTNO	umu	2013	umu:2013	tp2:umu:2013:set3		287	110	3	2.60909	NRCRI
logRTNO	umu	2013	umu:2013	tp2:umu:2013:set1		302	114	3	2.64912	NRCRI
logRTNO	oto	2013	oto:2013	tp1:oto:2013:set2		571	236	3	2.41949	NRCRI
logRTNO	umu	2013	umu:2013	tp1:umu:2013:set2		551	223	3	2.47085	NRCRI
logSHTWT	umu	2012	umu:2012	tp1:umu:2012:set1		1383	472	3	2.93008	NRCRI
logSHTWT	kano	2013	kano:2013	tp1:kano:2013:set1		570	223	3	2.55605	NRCRI
logSHTWT	oto	2013	oto:2013	tp1:oto:2013:set1		587	227	3	2.5859	NRCRI
logSHTWT	kano	2014	kano:2014	tp1:kano:2014:set1		144	142	1	1.01408	NRCRI
logSHTWT	umu	2014	umu:2014	tp1:umu:2014:set1		590	230	3	2.56522	NRCRI
logSHTWT	umu	2014	umu:2014	tp2:umu:2014:set4		287	107	3	2.68224	NRCRI
logSHTWT	oto	2014	oto:2014	tp1:oto:2014:set1		577	219	3	2.6347	NRCRI
logSHTWT	umu	2013	umu:2013	tp1:umu:2013:set1		565	226	3	2.5	NRCRI
logSHTWT	umu	2013	umu:2013	tp2:umu:2013:set4		246	107	3	2.29907	NRCRI
logSHTWT	umu	2013	umu:2013	tp2:umu:2013:set2		322	114	3	2.82456	NRCRI
logSHTWT	umu	2014	umu:2014	tp2:umu:2014:set2		314	112	3	2.80357	NRCRI
logSHTWT	kano	2014	kano:2014	tp1:kano:2014:set2		272	184	3	1.47826	NRCRI
logSHTWT	umu	2014	umu:2014	tp1:umu:2014:set2		606	215	3	2.8186	NRCRI
logSHTWT	kano	2013	kano:2013	tp1:kano:2013:set2		540	236	3	2.28814	NRCRI
logSHTWT	oto	2014	oto:2014	tp1:oto:2014:set2		651	237	3	2.74684	NRCRI
logSHTWT	umu	2014	umu:2014	tp2:umu:2014:set1		337	116	3	2.90517	NRCRI
logSHTWT	umu	2014	umu:2014	tp2:umu:2014:set3		244	97	3	2.51546	NRCRI
logSHTWT	umu	2013	umu:2013	tp2:umu:2013:set3		286	109	3	2.62385	NRCRI
logSHTWT	umu	2013	umu:2013	tp2:umu:2013:set1		301	114	3	2.64035	NRCRI
logSHTWT	oto	2013	oto:2013	tp1:oto:2013:set2		558	233	3	2.39485	NRCRI
logSHTWT	umu	2013	umu:2013	tp1:umu:2013:set2		553	223	3	2.47982	NRCRI
DM	umu	2012	umu:2012	tp1:umu:2012:set1		1385	472	3	2.93432	NRCRI
DM	kano	2013	kano:2013	tp1:kano:2013:set1		567	224	3	2.53125	NRCRI
DM	oto	2013	oto:2013	tp1:oto:2013:set1		481	221	3	2.17647	NRCRI
DM	umu	2014	umu:2014	tp1:umu:2014:set1		589	230	3	2.56087	NRCRI
DM	umu	2014	umu:2014	tp2:umu:2014:set4		280	105	3	2.66667	NRCRI
DM	oto	2014	oto:2014	tp1:oto:2014:set1		568	219	3	2.59361	NRCRI
DM	umu	2013	umu:2013	tp1:umu:2013:set1		572	225	3	2.54222	NRCRI
DM	umu	2013	umu:2013	tp2:umu:2013:set4		241	107	3	2.25234	NRCRI
DM	kano	2014	kano:2014	tp1:kano:2014:set1		69	66	1	1.04545	NRCRI
DM	umu	2013	umu:2013	tp2:umu:2013:set2		322	114	3	2.82456	NRCRI
DM	kano	2014	kano:2014	tp1:kano:2014:set2		245	173	3	1.41618	NRCRI
DM	umu	2014	umu:2014	tp1:umu:2014:set2		601	216	3	2.78241	NRCRI
DM	kano	2013	kano:2013	tp1:kano:2013:set2		525	234	3	2.24359	NRCRI
DM	oto	2014	oto:2014	tp1:oto:2014:set2		632	235	3	2.68936	NRCRI
DM	umu	2014	umu:2014	tp2:umu:2014:set1		333	115	3	2.89565	NRCRI
DM	umu	2014	umu:2014	tp2:umu:2014:set3		238	97	3	2.45361	NRCRI
DM	umu	2013	umu:2013	tp2:umu:2013:set3		283	110	3	2.57273	NRCRI
DM	umu	2013	umu:2013	tp2:umu:2013:set1		303	115	3	2.63478	NRCRI
DM	oto	2013	oto:2013	tp1:oto:2013:set2		569	236	3	2.41102	NRCRI
DM	umu	2013	umu:2013	tp1:umu:2013:set2		552	224	3	2.46429	NRCRI
HI	umu	2012	umu:2012	tp1:umu:2012:set1		1381	472	3	2.92585	NRCRI
HI	kano	2013	kano:2013	tp1:kano:2013:set1		567	223	3	2.5426	NRCRI
HI	oto	2013	oto:2013	tp1:oto:2013:set1		569	226	3	2.5177	NRCRI
HI	umu	2014	umu:2014	tp1:umu:2014:set1		589	230	3	2.56087	NRCRI
HI	umu	2014	umu:2014	tp2:umu:2014:set4		287	107	3	2.68224	NRCRI
HI	oto	2014	oto:2014	tp1:oto:2014:set1		569	219	3	2.59817	NRCRI
HI	umu	2013	umu:2013	tp1:umu:2013:set1		563	226	3	2.49115	NRCRI
HI	umu	2013	umu:2013	tp2:umu:2013:set4		246	107	3	2.29907	NRCRI
HI	kano	2014	kano:2014	tp1:kano:2014:set1		141	139	1	1.01439	NRCRI
HI	umu	2013	umu:2013	tp2:umu:2013:set2		322	114	3	2.82456	NRCRI
HI	umu	2014	umu:2014	tp2:umu:2014:set2		314	112	3	2.80357	NRCRI
HI	kano	2014	kano:2014	tp1:kano:2014:set2		252	178	3	1.41573	NRCRI
HI	umu	2014	umu:2014	tp1:umu:2014:set2		606	215	3	2.8186	NRCRI
HI	kano	2013	kano:2013	tp1:kano:2013:set2		540	236	3	2.28814	NRCRI
HI	oto	2014	oto:2014	tp1:oto:2014:set2		646	237	3	2.72574	NRCRI
HI	umu	2014	umu:2014	tp2:umu:2014:set1		333	115	3	2.89565	NRCRI
HI	umu	2014	umu:2014	tp2:umu:2014:set3		243	97	3	2.50515	NRCRI
HI	umu	2013	umu:2013	tp2:umu:2013:set3		285	109	3	2.61468	NRCRI
HI	umu	2013	umu:2013	tp2:umu:2013:set1		301	114	3	2.64035	NRCRI
HI	oto	2013	oto:2013	tp1:oto:2013:set2		558	233	3	2.39485	NRCRI
HI	umu	2013	umu:2013	tp1:umu:2013:set2		551	223	3	2.47085	NRCRI
MCMDS	umu	2012	umu:2012	tp1:umu:2012:set1		1391	472	3	2.94703	NRCRI
MCMDS	kano	2013	kano:2013	tp1:kano:2013:set1		639	232	3	2.75431	NRCRI
MCMDS	oto	2013	oto:2013	tp1:oto:2013:set1		665	234	3	2.84188	NRCRI
MCMDS	kano	2014	kano:2014	tp1:kano:2014:set1		209	202	1	1.03465	NRCRI
MCMDS	umu	2014	umu:2014	tp1:umu:2014:set1		612	231	3	2.64935	NRCRI
MCMDS	umu	2014	umu:2014	tp2:umu:2014:set4		298	107	3	2.78505	NRCRI
MCMDS	oto	2014	oto:2014	tp1:oto:2014:set1		594	220	3	2.7	NRCRI
MCMDS	umu	2013	umu:2013	tp1:umu:2013:set1		680	234	3	2.90598	NRCRI
MCMDS	umu	2013	umu:2013	tp2:umu:2013:set4		318	110	3	2.89091	NRCRI
MCMDS	umu	2013	umu:2013	tp2:umu:2013:set2		342	114	3	3	NRCRI
MCMDS	umu	2014	umu:2014	tp2:umu:2014:set2		332	113	3	2.93805	NRCRI
MCMDS	kano	2014	kano:2014	tp1:kano:2014:set2		397	217	3	1.82949	NRCRI
MCMDS	umu	2014	umu:2014	tp1:umu:2014:set2		640	220	3	2.90909	NRCRI
MCMDS	kano	2013	kano:2013	tp1:kano:2013:set2		630	247	3	2.55061	NRCRI
MCMDS	oto	2014	oto:2014	tp1:oto:2014:set2		700	237	3	2.95359	NRCRI
MCMDS	umu	2014	umu:2014	tp2:umu:2014:set1		345	116	3	2.97414	NRCRI
MCMDS	umu	2014	umu:2014	tp2:umu:2014:set3		280	99	3	2.82828	NRCRI
MCMDS	umu	2013	umu:2013	tp2:umu:2013:set3		324	110	3	2.94545	NRCRI
MCMDS	umu	2013	umu:2013	tp2:umu:2013:set1		327	116	3	2.81897	NRCRI
MCMDS	oto	2013	oto:2013	tp1:oto:2013:set2		730	250	3	2.92	NRCRI
MCMDS	umu	2013	umu:2013	tp1:umu:2013:set2		672	237	3	2.83544	NRCRI
MCBBS	umu	2012	umu:2012	tp1:umu:2012:set1		1392	472	3	2.94915	NRCRI
MCBBS	kano	2013	kano:2013	tp1:kano:2013:set1		631	231	3	2.7316	NRCRI
MCBBS	oto	2013	oto:2013	tp1:oto:2013:set1		658	233	3	2.82403	NRCRI
MCBBS	kano	2014	kano:2014	tp1:kano:2014:set1		209	202	1	1.03465	NRCRI
MCBBS	umu	2014	umu:2014	tp1:umu:2014:set1		612	231	3	2.64935	NRCRI
MCBBS	umu	2014	umu:2014	tp2:umu:2014:set4		298	107	3	2.78505	NRCRI
MCBBS	oto	2014	oto:2014	tp1:oto:2014:set1		594	220	3	2.7	NRCRI
MCBBS	umu	2013	umu:2013	tp1:umu:2013:set1		664	233	3	2.84979	NRCRI
MCBBS	umu	2013	umu:2013	tp2:umu:2013:set4		318	110	3	2.89091	NRCRI
MCBBS	umu	2013	umu:2013	tp2:umu:2013:set2		342	114	3	3	NRCRI
MCBBS	umu	2014	umu:2014	tp2:umu:2014:set2		332	113	3	2.93805	NRCRI
MCBBS	kano	2014	kano:2014	tp1:kano:2014:set2		397	217	3	1.82949	NRCRI
MCBBS	umu	2014	umu:2014	tp1:umu:2014:set2		640	220	3	2.90909	NRCRI
MCBBS	kano	2013	kano:2013	tp1:kano:2013:set2		615	242	3	2.54132	NRCRI
MCBBS	oto	2014	oto:2014	tp1:oto:2014:set2		705	237	3	2.97468	NRCRI
MCBBS	umu	2014	umu:2014	tp2:umu:2014:set1		345	116	3	2.97414	NRCRI
MCBBS	umu	2014	umu:2014	tp2:umu:2014:set3		278	99	3	2.80808	NRCRI
MCBBS	umu	2013	umu:2013	tp2:umu:2013:set3		324	110	3	2.94545	NRCRI
MCBBS	umu	2013	umu:2013	tp2:umu:2013:set1		327	116	3	2.81897	NRCRI
MCBBS	oto	2013	oto:2013	tp1:oto:2013:set2		731	250	3	2.924	NRCRI
MCBBS	umu	2013	umu:2013	tp1:umu:2013:set2		669	237	3	2.82278	NRCRI
CBSDRS	KASESE	2013	KASESE:2013	KASESE:2013		452	288	2	1.56944	NaCRRI
CBSDRS	NGETTA	2013	NGETTA:2013	NGETTA:2013		488	311	2	1.56913	NaCRRI
CBSDRS	NAMULONGE	2014	NAMULONGE:2014	NAMULONGE:2014		592	300	2	1.97333	NaCRRI
CBSDRS	NAMULONGE	2013	NAMULONGE:2013	NAMULONGE:2013		713	392	2	1.81888	NaCRRI
CBSDRS	NAMULONGE	2012	NAMULONGE:2012	NAMULONGE:2012		276	276	1	1	NaCRRI
MCMDS	KASESE	2013	KASESE:2013	KASESE:2013		520	308	2	1.68831	NaCRRI
MCMDS	NGETTA	2013	NGETTA:2013	NGETTA:2013		578	341	2	1.69501	NaCRRI
MCMDS	NAMULONGE	2014	NAMULONGE:2014	NAMULONGE:2014		713	327	2	2.18043	NaCRRI
MCMDS	NAMULONGE	2013	NAMULONGE:2013	NAMULONGE:2013		780	408	2	1.91176	NaCRRI
MCMDS	NAMULONGE	2012	NAMULONGE:2012	NAMULONGE:2012		288	288	1	1	NaCRRI
MCBSDS	KASESE	2013	KASESE:2013	KASESE:2013		520	308	2	1.68831	NaCRRI
MCBSDS	NGETTA	2013	NGETTA:2013	NGETTA:2013		583	343	2	1.69971	NaCRRI
MCBSDS	NAMULONGE	2014	NAMULONGE:2014	NAMULONGE:2014		710	326	2	2.17791	NaCRRI
MCBSDS	NAMULONGE	2013	NAMULONGE:2013	NAMULONGE:2013		780	408	2	1.91176	NaCRRI
MCBSDS	NAMULONGE	2012	NAMULONGE:2012	NAMULONGE:2012		288	288	1	1	NaCRRI
logRTWT	KASESE	2013	KASESE:2013	KASESE:2013		434	282	2	1.53901	NaCRRI
logRTWT	NAMULONGE	2013	NAMULONGE:2013	NAMULONGE:2013		711	388	2	1.83247	NaCRRI
logRTWT	NAMULONGE	2012	NAMULONGE:2012	NAMULONGE:2012		277	277	1	1	NaCRRI
logRTWT	NGETTA	2013	NGETTA:2013	NGETTA:2013		441	290	2	1.52069	NaCRRI
logRTNO	KASESE	2013	KASESE:2013	KASESE:2013		435	281	2	1.54804	NaCRRI
logRTNO	NAMULONGE	2013	NAMULONGE:2013	NAMULONGE:2013		705	389	2	1.81234	NaCRRI
logRTNO	NAMULONGE	2012	NAMULONGE:2012	NAMULONGE:2012		279	279	1	1	NaCRRI
logRTNO	NGETTA	2013	NGETTA:2013	NGETTA:2013		439	291	2	1.50859	NaCRRI

## Sheet: TableS06
Trait	LOCATION	YEAR.HARVESTED	LOC.YEAR	LOC.YEAR.TRIAL	TRIAL.TYPE	Nobs	Nclone	Nrep	ObsToCloneRatio	INSTITUTE	LRT_IDM	LRT_nonIDM	CorOfEsts_IDMvsNonIDM	LRTnullSig	Filter1	LRTnonIIDsig	Filter2	BestModel	AICdiffFrom2ndBest	SecondBestModel	Filter3
MCMDS	IBA	2001	IBA_2001	IBA_2001_00&01GGAINIB+RVA combined	GeneticGain	794	211	2	3.76303	IITA	0.00170777	0.622995	-0.36	TRUE	PASS	TRUE	PASS	nonIDM	-0.504166	ALL	PASS
MCMDS	IBA	2006	IBA_2006	IBA_2006_05ggainIB	GeneticGain	843	381	2	2.2126	IITA	8.72198e-10	0.944877	-0.22	TRUE	PASS	TRUE	PASS	nonIDM	-2.00478	PARTITIONED	PASS
MCMDS	IBA	2007	IBA_2007	IBA_2007_06ggainIB	GeneticGain	859	387	2	2.21964	IITA	1.01347e-05	0.0527043	-0.75	TRUE	PASS	TRUE	PASS	PARTITIONED	-0.542001	ALL	PASS
MCMDS	IBA	2012	IBA_2012	IBA_2012_11ggainIB	GeneticGain	693	630	1	1.1	IITA	9.98648e-08	0.977461	-0.15	TRUE	PASS	TRUE	PASS	nonIDM	-1.65808	ALL	PASS
MCMDS	IBA	2014	IBA_2014	IBA_2014_2013.GG.IBA.harvest+preharvest	GeneticGain	715	661	1	1.08169	IITA	1.17025e-09	0.939205	-0.15	TRUE	PASS	TRUE	PASS	nonIDM	-2.00582	PARTITIONED	PASS
MCMDS	IBA	2006	IBA_2006	IBA_2006_LOCGERM.2005.IBA	LocalGermplasm	738	655	1	1.12672	IITA	1.50033e-07	0.96997	-0.24	TRUE	PASS	TRUE	PASS	nonIDM	-1.14969	ALL	PASS
MCMDS	IBA	2007	IBA_2007	IBA_2007_LOCGERM.2006.IBA	LocalGermplasm	672	627	1	1.07177	IITA	2.03441e-06	0.0693186	-0.43	TRUE	PASS	TRUE	PASS	ALL	-1.71884	PARTITIONED	PASS
MCMDS	IBA	2013	IBA_2013	IBA_2013_LOCGERM.2012.IBA	LocalGermplasm	576	575	1	1.00174	IITA	3.32013e-06	0.916553	-0.23	TRUE	PASS	TRUE	PASS	nonIDM	-0.784117	ALL	PASS
MCMDS	IBA	2000	IBA_2000	IBA_2000_LOCGERM.1999.IBA	LocalGermplasm	278	241	1	1.15353	IITA	0.00265175	0.360962	-0.54	TRUE	PASS	TRUE	PASS	ALL	-0.706597	nonIDM	PASS
MCMDS	MOK	2006	MOK_2006	MOK_2006_05ggainMK	GeneticGain	631	308	2	2.0487	IITA	0.474291	0.00143382	-0.81	TRUE	PASS	TRUE	PASS	IDM	-1.48804	PARTITIONED	PASS
MCMDS	MOK	2007	MOK_2007	MOK_2007_06ggainMK	GeneticGain	694	320	2	2.16875	IITA	0.152816	0.275793	-0.74	TRUE	PASS	TRUE	PASS	ALL	-0.636383	nonIDM	PASS
MCMDS	MOK	2008	MOK_2008	MOK_2008_07ggainMK	GeneticGain	813	368	2	2.20924	IITA	0.193921	5.17622e-05	-0.8	TRUE	PASS	TRUE	PASS	IID	-13.5404	IDM	FAIL
MCMDS	MOK	2011	MOK_2011	MOK_2011_10ggainMK	GeneticGain	583	553	1	1.05425	IITA	7.98651e-08	0.95206	-0.16	TRUE	PASS	TRUE	PASS	nonIDM	-2.00361	PARTITIONED	PASS
MCMDS	MOK	2003	MOK_2003	MOK_2003_LOCGERM.2002.MOK	LocalGermplasm	304	295	1	1.03051	IITA	0.00078163	0.317198	-0.46	TRUE	PASS	TRUE	PASS	ALL	-0.971706	nonIDM	PASS
MCMDS	MOK	2005	MOK_2005	MOK_2005_LOCGERM.2004.MOK	LocalGermplasm	283	239	1	1.1841	IITA	0.000167014	0.603059	-0.48	TRUE	PASS	TRUE	PASS	IID	-0.169333	ALL	PASS
MCMDS	UBJ	2006	UBJ_2006	UBJ_2006_05ggainUB	GeneticGain	747	381	2	1.96063	IITA	0.138961	0.451924	-0.77	TRUE	PASS	TRUE	PASS	nonIDM	-1.43418	PARTITIONED	PASS
MCMDS	UBJ	2007	UBJ_2007	UBJ_2007_06ggainUB	GeneticGain	825	412	2	2.00243	IITA	0.00023991	0.720738	-0.23	TRUE	PASS	TRUE	PASS	nonIDM	-0.510131	ALL	PASS
MCMDS	UBJ	2008	UBJ_2008	UBJ_2008_07ggainUB	GeneticGain	923	446	2	2.06951	IITA	4.79512e-06	0.493827	-0.72	TRUE	PASS	TRUE	PASS	nonIDM	-1.59344	ALL	PASS
MCMDS	UBJ	2009	UBJ_2009	UBJ_2009_08GgainUB	GeneticGain	554	532	1	1.04135	IITA	1.84836e-06	0.921838	-0.15	TRUE	PASS	TRUE	PASS	nonIDM	-2.00963	PARTITIONED	PASS
MCMDS	UBJ	2010	UBJ_2010	UBJ_2010_09ggainUB	GeneticGain	632	593	1	1.06577	IITA	2.53694e-07	0.932382	-0.15	TRUE	PASS	TRUE	PASS	nonIDM	-2.0072	PARTITIONED	PASS
MCMDS	UBJ	2011	UBJ_2011	UBJ_2011_10ggainUB	GeneticGain	1285	620	2	2.07258	IITA	4.19624e-09	0.290516	-0.71	TRUE	PASS	TRUE	PASS	nonIDM	-0.882772	PARTITIONED	PASS
MCMDS	UBJ	2013	UBJ_2013	UBJ_2013_2012.GG.UBJ	GeneticGain	1424	666	2	2.13814	IITA	4.63031e-19	0.924824	-0.22	TRUE	PASS	TRUE	PASS	nonIDM	-2.0089	PARTITIONED	PASS
MCMDS	UBJ	2015	UBJ_2015	UBJ_2015_2014.GG.UBJ_preharvest_harvest data	GeneticGain	715	669	1	1.06876	IITA	7.59854e-12	0.920358	-0.15	TRUE	PASS	TRUE	PASS	nonIDM	-2.01	PARTITIONED	PASS
MCMDS	UBJ	2001	UBJ_2001	UBJ_2001_LOCGERM.2000.UBJ	LocalGermplasm	323	270	1	1.1963	IITA	0.301412	0.000776522	-0.74	TRUE	PASS	TRUE	PASS	IDM	-0.932064	PARTITIONED	PASS
MCMDS	UBJ	2002	UBJ_2002	UBJ_2002_LOCGERM.2001.UBJ	LocalGermplasm	359	299	1	1.20067	IITA	0.0858585	0.00784197	-0.71	TRUE	PASS	TRUE	PASS	PARTITIONED	-0.950359	IDM	PASS
MCMDS	UBJ	2003	UBJ_2003	UBJ_2003_LOCGERM.2002.UBJ	LocalGermplasm	546	464	1	1.17672	IITA	0.0668793	0.00798317	-0.68	TRUE	PASS	TRUE	PASS	PARTITIONED	-1.358	IDM	PASS
MCMDS	UBJ	2004	UBJ_2004	UBJ_2004_LOCGERM.2003.UBJ	LocalGermplasm	599	518	1	1.15637	IITA	0.0140525	0.0129689	-0.55	TRUE	PASS	TRUE	PASS	ALL	-0.521616	PARTITIONED	PASS
MCMDS	UBJ	2005	UBJ_2005	UBJ_2005_LOCGERM.2004.UBJ	LocalGermplasm	611	580	1	1.05345	IITA	0.000383731	0.00794291	-0.41	TRUE	PASS	TRUE	PASS	ALL	-1.29138	PARTITIONED	PASS
MCMDS	UBJ	2006	UBJ_2006	UBJ_2006_LOCGERM.2005.UBJ	LocalGermplasm	618	583	1	1.06003	IITA	0.00038249	0.0379095	-0.49	TRUE	PASS	TRUE	PASS	ALL	-1.34248	PARTITIONED	PASS
MCMDS	UBJ	2007	UBJ_2007	UBJ_2007_LOCGERM.2006.UBJ	LocalGermplasm	669	627	1	1.06699	IITA	0.000189561	0.460932	-0.33	TRUE	PASS	TRUE	PASS	ALL	-0.477407	nonIDM	PASS
MCMDS	UBJ	2010	UBJ_2010	UBJ_2010_LOCGERM.2009.UBJ	LocalGermplasm	823	791	1	1.04046	IITA	3.01173e-06	0.151375	-0.39	TRUE	PASS	TRUE	PASS	ALL	-1.96598	PARTITIONED	PASS
MCMDS	UBJ	2013	UBJ_2013	UBJ_2013_LOCGERM.2012.UBJ	LocalGermplasm	828	827	1	1.00121	IITA	8.06227e-15	0.918491	-0.2	TRUE	PASS	TRUE	PASS	nonIDM	-2.01047	PARTITIONED	PASS
MCMDS	UBJ	2014	UBJ_2014	UBJ_2014_LOCGERM.2013.UBJ	LocalGermplasm	881	836	1	1.05383	IITA	1.79475e-19	0.905632	-0.21	TRUE	PASS	TRUE	PASS	nonIDM	-2.01405	PARTITIONED	PASS
MCMDS	UBJ	2015	UBJ_2015	UBJ_2015_LOCGERM.2014.UBJ	LocalGermplasm	842	809	1	1.04079	IITA	1.67519e-18	0.878825	-0.22	TRUE	PASS	TRUE	PASS	nonIDM	-2.02324	PARTITIONED	PASS
MCMDS	UBJ	2016	UBJ_2016	UBJ_2016_LOCGERM.2015.UBJ	LocalGermplasm	824	796	1	1.03518	IITA	4.90141e-16	0.925231	-0.22	TRUE	PASS	TRUE	PASS	nonIDM	-2.00881	PARTITIONED	PASS
MCMDS	ZAR	2006	ZAR_2006	ZAR_2006_05ggainZA	GeneticGain	513	250	2	2.052	IITA	0.709659	8.37121e-05	-0.85	TRUE	PASS	TRUE	PASS	IDM	-2.13862	PARTITIONED	PASS
MCMDS	ZAR	2007	ZAR_2007	ZAR_2007_06ggainZA	GeneticGain	594	283	2	2.09894	IITA	0.314891	2.49675e-05	-0.82	TRUE	PASS	TRUE	PASS	IDM	-0.98995	PARTITIONED	PASS
MCMDS	ZAR	2008	ZAR_2008	ZAR_2008_07ggainZA	GeneticGain	658	310	2	2.12258	IITA	0.246725	0.000109318	-0.82	TRUE	PASS	TRUE	PASS	IDM	-0.658245	PARTITIONED	PASS
MCMDS	MAL	2007	MAL_2007	MAL_2007_06ggainMM	GeneticGain	529	257	2	2.05837	IITA	0.00448285	0.542851	-0.37	TRUE	PASS	TRUE	PASS	IID	-8.92055	nonIDM	FAIL
MCMDS	MAL	2006	MAL_2006	MAL_2006_LOCGERM.2005.MAL	LocalGermplasm	167	159	1	1.05031	IITA	0.000422513	0.829613	-0.39	TRUE	PASS	TRUE	PASS	nonIDM	-0.335466	ALL	PASS
MCMDS	ONNE	2007	ONNE_2007	ONNE_2007_06ggainON	GeneticGain	301	284	1	1.05986	IITA	0.145563	0.338054	-0.27	TRUE	PASS	TRUE	PASS	ALL	-0.887259	nonIDM	PASS
MCMDS	ONNE	2008	ONNE_2008	ONNE_2008_07ggainON	GeneticGain	876	434	2	2.01843	IITA	0.000339585	0.0583117	-0.76	TRUE	PASS	TRUE	PASS	IID	-18.5887	PARTITIONED	FAIL
MCBBS	IBA	2001	IBA_2001	IBA_2001_00&01GGAINIB+RVA combined	GeneticGain	793	211	2	3.75829	IITA	0.00101408	0.899425	-0.29	TRUE	PASS	TRUE	PASS	nonIDM	-0.95733	ALL	PASS
MCBBS	IBA	2006	IBA_2006	IBA_2006_05ggainIB	GeneticGain	832	381	2	2.18373	IITA	0.0107219	0.238908	-0.33	TRUE	PASS	TRUE	PASS	ALL	-1.36027	nonIDM	PASS
MCBBS	IBA	2007	IBA_2007	IBA_2007_06ggainIB	GeneticGain	857	387	2	2.21447	IITA	0.00764236	0.544071	-0.27	TRUE	PASS	TRUE	PASS	ALL	-0.337952	nonIDM	PASS
MCBBS	IBA	2012	IBA_2012	IBA_2012_11ggainIB	GeneticGain	692	630	1	1.09841	IITA	1.50484e-07	0.935833	-0.16	TRUE	PASS	TRUE	PASS	nonIDM	-2.00648	PARTITIONED	PASS
MCBBS	IBA	2014	IBA_2014	IBA_2014_2013.GG.IBA.harvest+preharvest	GeneticGain	714	660	1	1.08182	IITA	0.00191634	0.938068	-0.17	TRUE	PASS	TRUE	PASS	nonIDM	-1.39537	ALL	PASS
MCBBS	IBA	2007	IBA_2007	IBA_2007_LOCGERM.2006.IBA	LocalGermplasm	660	617	1	1.06969	IITA	0.705475	0.618889	-0.47	TRUE	PASS	TRUE	PASS	IID	-455.84	nonIDM	FAIL
MCBBS	IBA	2013	IBA_2013	IBA_2013_LOCGERM.2012.IBA	LocalGermplasm	552	551	1	1.00181	IITA	0.000532542	0.866837	-0.26	TRUE	PASS	TRUE	PASS	nonIDM	-1.26432	ALL	PASS
MCBBS	IBA	2000	IBA_2000	IBA_2000_LOCGERM.1999.IBA	LocalGermplasm	278	241	1	1.15353	IITA	0.0837936	0.480983	-0.47	TRUE	PASS	TRUE	PASS	ALL	-0.428156	nonIDM	PASS
MCBBS	MOK	2006	MOK_2006	MOK_2006_05ggainMK	GeneticGain	631	308	2	2.0487	IITA	0.0232213	0.974237	-0.22	TRUE	PASS	TRUE	PASS	IID	-3.86086	nonIDM	FAIL
MCBBS	MOK	2007	MOK_2007	MOK_2007_06ggainMK	GeneticGain	694	320	2	2.16875	IITA	0.0624024	0.466234	-0.39	TRUE	PASS	TRUE	PASS	IID	-3.89059	ALL	FAIL
MCBBS	MOK	2008	MOK_2008	MOK_2008_07ggainMK	GeneticGain	813	368	2	2.20924	IITA	0.0138427	0.783636	-0.23	TRUE	PASS	TRUE	PASS	IID	-3.51003	nonIDM	FAIL
MCBBS	MOK	2011	MOK_2011	MOK_2011_10ggainMK	GeneticGain	583	553	1	1.05425	IITA	0.0355128	0.942516	-0.19	TRUE	PASS	TRUE	PASS	nonIDM	-0.071103	ALL	PASS
MCBBS	MOK	2003	MOK_2003	MOK_2003_LOCGERM.2002.MOK	LocalGermplasm	304	295	1	1.03051	IITA	0.00353349	0.956693	-0.32	TRUE	PASS	TRUE	PASS	IID	-75.7989	nonIDM	FAIL
MCBBS	MOK	2005	MOK_2005	MOK_2005_LOCGERM.2004.MOK	LocalGermplasm	282	238	1	1.18487	IITA	0.78302	0.911929	-0.57	TRUE	PASS	TRUE	PASS	IDM	-0.0560936	ALL	PASS
MCBBS	UBJ	2006	UBJ_2006	UBJ_2006_05ggainUB	GeneticGain	744	381	2	1.95276	IITA	0.00664292	0.515632	-0.24	TRUE	PASS	TRUE	PASS	ALL	-0.156463	nonIDM	PASS
MCBBS	UBJ	2007	UBJ_2007	UBJ_2007_06ggainUB	GeneticGain	824	412	2	2	IITA	0.0186893	0.884688	-0.21	TRUE	PASS	TRUE	PASS	nonIDM	-1.0528	ALL	PASS
MCBBS	UBJ	2008	UBJ_2008	UBJ_2008_07ggainUB	GeneticGain	923	446	2	2.06951	IITA	8.91672e-06	0.273539	-0.25	TRUE	PASS	TRUE	PASS	ALL	-0.732144	nonIDM	PASS
MCBBS	UBJ	2009	UBJ_2009	UBJ_2009_08GgainUB	GeneticGain	554	532	1	1.04135	IITA	0.213209	0.840022	-0.2	TRUE	PASS	TRUE	PASS	nonIDM	-0.0338155	ALL	PASS
MCBBS	UBJ	2010	UBJ_2010	UBJ_2010_09ggainUB	GeneticGain	632	593	1	1.06577	IITA	6.6742e-07	0.376883	-0.17	TRUE	PASS	TRUE	PASS	nonIDM	-0.552259	ALL	PASS
MCBBS	UBJ	2011	UBJ_2011	UBJ_2011_10ggainUB	GeneticGain	1284	620	2	2.07097	IITA	5.09593e-11	0.329243	-0.34	TRUE	PASS	TRUE	PASS	ALL	-0.620928	nonIDM	PASS
MCBBS	UBJ	2013	UBJ_2013	UBJ_2013_2012.GG.UBJ	GeneticGain	1423	666	2	2.13664	IITA	0.00183232	0.236661	-0.41	TRUE	PASS	TRUE	PASS	ALL	-1.16994	nonIDM	PASS
MCBBS	UBJ	2015	UBJ_2015	UBJ_2015_2014.GG.UBJ_preharvest_harvest data	GeneticGain	715	669	1	1.06876	IITA	9.68083e-05	0.95507	-0.16	TRUE	PASS	TRUE	PASS	nonIDM	-1.72435	ALL	PASS
MCBBS	UBJ	2001	UBJ_2001	UBJ_2001_LOCGERM.2000.UBJ	LocalGermplasm	323	270	1	1.1963	IITA	0.000264818	0.970024	-0.37	TRUE	PASS	TRUE	PASS	nonIDM	-0.514968	ALL	PASS
MCBBS	UBJ	2002	UBJ_2002	UBJ_2002_LOCGERM.2001.UBJ	LocalGermplasm	357	299	1	1.19398	IITA	6.14129e-05	0.757124	-0.35	TRUE	PASS	TRUE	PASS	nonIDM	-1.54023	ALL	PASS
MCBBS	UBJ	2003	UBJ_2003	UBJ_2003_LOCGERM.2002.UBJ	LocalGermplasm	545	464	1	1.17457	IITA	4.57335e-05	0.914437	-0.28	TRUE	PASS	TRUE	PASS	nonIDM	-1.12139	ALL	PASS
MCBBS	UBJ	2004	UBJ_2004	UBJ_2004_LOCGERM.2003.UBJ	LocalGermplasm	597	517	1	1.15474	IITA	0.00306756	0.79854	-0.3	TRUE	PASS	TRUE	PASS	nonIDM	-1.14736	ALL	PASS
MCBBS	UBJ	2005	UBJ_2005	UBJ_2005_LOCGERM.2004.UBJ	LocalGermplasm	611	580	1	1.05345	IITA	7.27064e-05	0.951167	-0.26	TRUE	PASS	TRUE	PASS	nonIDM	-1.01897	ALL	PASS
MCBBS	UBJ	2006	UBJ_2006	UBJ_2006_LOCGERM.2005.UBJ	LocalGermplasm	618	583	1	1.06003	IITA	5.59717e-07	0.920527	-0.26	TRUE	PASS	TRUE	PASS	nonIDM	-1.68305	ALL	PASS
MCBBS	UBJ	2007	UBJ_2007	UBJ_2007_LOCGERM.2006.UBJ	LocalGermplasm	667	627	1	1.0638	IITA	0.0131297	0.677129	-0.29	TRUE	PASS	TRUE	PASS	ALL	-0.0356524	nonIDM	PASS
MCBBS	UBJ	2010	UBJ_2010	UBJ_2010_LOCGERM.2009.UBJ	LocalGermplasm	821	789	1	1.04056	IITA	3.48472e-05	0.610538	-0.25	TRUE	PASS	TRUE	PASS	nonIDM	-0.0604802	ALL	PASS
MCBBS	UBJ	2013	UBJ_2013	UBJ_2013_LOCGERM.2012.UBJ	LocalGermplasm	828	827	1	1.00121	IITA	0.74501	0.991912	-0.46	TRUE	PASS	TRUE	PASS	IID	-14.4087	ALL	FAIL
MCBBS	UBJ	2014	UBJ_2014	UBJ_2014_LOCGERM.2013.UBJ	LocalGermplasm	881	836	1	1.05383	IITA	0.000435037	0.980596	-0.23	TRUE	PASS	TRUE	PASS	nonIDM	-0.522958	ALL	PASS
MCBBS	UBJ	2015	UBJ_2015	UBJ_2015_LOCGERM.2014.UBJ	LocalGermplasm	843	810	1	1.04074	IITA	3.5375e-06	0.115314	-0.47	TRUE	PASS	TRUE	PASS	ALL	-1.61595	PARTITIONED	PASS
MCBBS	UBJ	2016	UBJ_2016	UBJ_2016_LOCGERM.2015.UBJ	LocalGermplasm	824	796	1	1.03518	IITA	0.00205536	0.955136	-0.23	TRUE	PASS	TRUE	PASS	nonIDM	-0.767889	ALL	PASS
MCBBS	ZAR	2006	ZAR_2006	ZAR_2006_05ggainZA	GeneticGain	513	250	2	2.052	IITA	0.0205182	0.899087	-0.23	TRUE	PASS	TRUE	PASS	nonIDM	-1.26697	ALL	PASS
MCBBS	ZAR	2007	ZAR_2007	ZAR_2007_06ggainZA	GeneticGain	594	283	2	2.09894	IITA	0.00118112	0.0672885	-0.34	TRUE	PASS	TRUE	PASS	ALL	-1.99708	PARTITIONED	PASS
MCBBS	ZAR	2008	ZAR_2008	ZAR_2008_07ggainZA	GeneticGain	658	310	2	2.12258	IITA	0.000285024	0.0378349	-0.38	TRUE	PASS	TRUE	PASS	ALL	-1.98629	PARTITIONED	PASS
MCBBS	ONNE	2007	ONNE_2007	ONNE_2007_06ggainON	GeneticGain	301	284	1	1.05986	IITA	0.540052	0.967466	-0.23	TRUE	PASS	TRUE	PASS	nonIDM	-0.121642	ALL	PASS
MCBBS	ONNE	2008	ONNE_2008	ONNE_2008_07ggainON	GeneticGain	873	434	2	2.01152	IITA	0.346743	0.994422	-0.24		FAIL	FALSE	FAIL	nonIDM	-0.17018	ALL	PASS
logRTNO	IBA	2001	IBA_2001	IBA_2001_00&01GGAINIB+RVA combined	GeneticGain	771	210	2	3.67143	IITA	1.87988e-05	0.29834	-0.37	TRUE	PASS	TRUE	PASS	ALL	-0.79978	nonIDM	PASS
logRTNO	IBA	2006	IBA_2006	IBA_2006_05ggainIB	GeneticGain	819	380	2	2.15526	IITA	2.15586e-06	0.962989	-0.21	TRUE	PASS	TRUE	PASS	nonIDM	-2.00215	PARTITIONED	PASS
logRTNO	IBA	2007	IBA_2007	IBA_2007_06ggainIB	GeneticGain	810	384	2	2.10938	IITA	0.000117144	0.0572825	-0.31	TRUE	PASS	TRUE	PASS	ALL	-1.96462	PARTITIONED	PASS
logRTNO	IBA	2012	IBA_2012	IBA_2012_11ggainIB	GeneticGain	673	614	1	1.09609	IITA	0.0324854	0.141325	-0.29	TRUE	PASS	TRUE	PASS	ALL	-1.80412	PARTITIONED	PASS
logRTNO	IBA	2014	IBA_2014	IBA_2014_2013.GG.IBA.harvest+preharvest	GeneticGain	711	658	1	1.08055	IITA	0.00614284	0.00838873	-0.27	TRUE	PASS	TRUE	PASS	ALL	-1.72448	PARTITIONED	PASS
logRTNO	IBA	2006	IBA_2006	IBA_2006_LOCGERM.2005.IBA	LocalGermplasm	682	608	1	1.12171	IITA	0.227949	0.0615097	-0.47	TRUE	PASS	TRUE	PASS	ALL	-0.437339	IDM	PASS
logRTNO	IBA	2007	IBA_2007	IBA_2007_LOCGERM.2006.IBA	LocalGermplasm	539	500	1	1.078	IITA	0.157824	0.0141035	-0.54	TRUE	PASS	TRUE	PASS	IDM	-0.00504317	PARTITIONED	PASS
logRTNO	IBA	2000	IBA_2000	IBA_2000_LOCGERM.1999.IBA	LocalGermplasm	242	205	1	1.18049	IITA	0.343816	0.388777	-0.55	TRUE	PASS	TRUE	PASS	ALL	-0.462275	nonIDM	PASS
logRTNO	MOK	2006	MOK_2006	MOK_2006_05ggainMK	GeneticGain	622	307	2	2.02606	IITA	0.00635601	0.797781	-0.24	TRUE	PASS	TRUE	PASS	nonIDM	-0.28051	ALL	PASS
logRTNO	MOK	2007	MOK_2007	MOK_2007_06ggainMK	GeneticGain	688	320	2	2.15	IITA	0.17132	0.0865691	-0.44	TRUE	PASS	TRUE	PASS	ALL	-1.19475	IID	PASS
logRTNO	MOK	2008	MOK_2008	MOK_2008_07ggainMK	GeneticGain	784	364	2	2.15385	IITA	0.039673	0.981146	-0.22	TRUE	PASS	TRUE	PASS	nonIDM	-0.241045	ALL	PASS
logRTNO	MOK	2011	MOK_2011	MOK_2011_10ggainMK	GeneticGain	581	551	1	1.05445	IITA	0.000144629	0.978158	-0.16	TRUE	PASS	TRUE	PASS	nonIDM	-1.26648	ALL	PASS
logRTNO	MOK	2003	MOK_2003	MOK_2003_LOCGERM.2002.MOK	LocalGermplasm	206	206	1	1	IITA	0.533323	0.856417	-0.47	TRUE	PASS	TRUE	PASS	nonIDM	-0.0737363	ALL	PASS
logRTNO	MOK	2005	MOK_2005	MOK_2005_LOCGERM.2004.MOK	LocalGermplasm	183	152	1	1.20395	IITA	0.167496	0.633382	-0.46	TRUE	PASS	TRUE	PASS	nonIDM	-0.349787	ALL	PASS
logRTNO	UBJ	2006	UBJ_2006	UBJ_2006_05ggainUB	GeneticGain	726	376	2	1.93085	IITA	0.442662	0.0858979	-0.46	TRUE	PASS	TRUE	PASS	IID	-1.89863	ALL	PASS
logRTNO	UBJ	2007	UBJ_2007	UBJ_2007_06ggainUB	GeneticGain	822	412	2	1.99515	IITA	0.000408118	0.43953	-0.23	TRUE	PASS	TRUE	PASS	IID	-3.77526	ALL	FAIL
logRTNO	UBJ	2008	UBJ_2008	UBJ_2008_07ggainUB	GeneticGain	921	446	2	2.06502	IITA	5.78459e-05	0.286074	-0.27	TRUE	PASS	TRUE	PASS	ALL	-0.758775	nonIDM	PASS
logRTNO	UBJ	2009	UBJ_2009	UBJ_2009_08GgainUB	GeneticGain	471	463	1	1.01728	IITA	0.0727629	0.492145	-0.2	TRUE	PASS	TRUE	PASS	ALL	-0.458449	nonIDM	PASS
logRTNO	UBJ	2010	UBJ_2010	UBJ_2010_09ggainUB	GeneticGain	624	587	1	1.06303	IITA	0.00850194	0.109172	-0.25	TRUE	PASS	TRUE	PASS	ALL	-1.92905	PARTITIONED	PASS
logRTNO	UBJ	2011	UBJ_2011	UBJ_2011_10ggainUB	GeneticGain	1269	620	2	2.04677	IITA	1.00691e-05	0.0025398	-0.39	TRUE	PASS	TRUE	PASS	ALL	-1.98723	PARTITIONED	PASS
logRTNO	UBJ	2013	UBJ_2013	UBJ_2013_2012.GG.UBJ	GeneticGain	1323	661	2	2.00151	IITA	6.96501e-10	0.663045	-0.2	TRUE	PASS	TRUE	PASS	nonIDM	-1.81015	PARTITIONED	PASS
logRTNO	UBJ	2015	UBJ_2015	UBJ_2015_2014.GG.UBJ_preharvest_harvest data	GeneticGain	713	667	1	1.06897	IITA	1.25501e-09	0.977727	-0.15	TRUE	PASS	TRUE	PASS	nonIDM	-2.00078	PARTITIONED	PASS
logRTNO	UBJ	2001	UBJ_2001	UBJ_2001_LOCGERM.2000.UBJ	LocalGermplasm	320	267	1	1.1985	IITA	0.00572406	0.885255	-0.37	TRUE	PASS	TRUE	PASS	nonIDM	-0.604231	ALL	PASS
logRTNO	UBJ	2002	UBJ_2002	UBJ_2002_LOCGERM.2001.UBJ	LocalGermplasm	352	292	1	1.20548	IITA	0.020284	0.296211	-0.56	TRUE	PASS	TRUE	PASS	ALL	-1.66959	nonIDM	PASS
logRTNO	UBJ	2003	UBJ_2003	UBJ_2003_LOCGERM.2002.UBJ	LocalGermplasm	511	436	1	1.17202	IITA	0.00144353	0.57677	-0.34	TRUE	PASS	TRUE	PASS	ALL	-0.250105	nonIDM	PASS
logRTNO	UBJ	2004	UBJ_2004	UBJ_2004_LOCGERM.2003.UBJ	LocalGermplasm	573	495	1	1.15758	IITA	0.00701093	0.151729	-0.43	TRUE	PASS	TRUE	PASS	ALL	-1.87228	PARTITIONED	PASS
logRTNO	UBJ	2005	UBJ_2005	UBJ_2005_LOCGERM.2004.UBJ	LocalGermplasm	593	562	1	1.05516	IITA	0.00943638	0.944468	-0.27	TRUE	PASS	TRUE	PASS	nonIDM	-0.464615	ALL	PASS
logRTNO	UBJ	2006	UBJ_2006	UBJ_2006_LOCGERM.2005.UBJ	LocalGermplasm	602	569	1	1.058	IITA	0.019205	0.420215	-0.36	TRUE	PASS	TRUE	PASS	ALL	-0.647602	nonIDM	PASS
logRTNO	UBJ	2007	UBJ_2007	UBJ_2007_LOCGERM.2006.UBJ	LocalGermplasm	642	606	1	1.05941	IITA	0.040207	0.974304	-0.31	TRUE	PASS	TRUE	PASS	nonIDM	-0.134778	ALL	PASS
logRTNO	UBJ	2010	UBJ_2010	UBJ_2010_LOCGERM.2009.UBJ	LocalGermplasm	800	771	1	1.03761	IITA	2.33543e-05	0.893731	-0.23	TRUE	PASS	TRUE	PASS	nonIDM	-1.31299	ALL	PASS
logRTNO	UBJ	2014	UBJ_2014	UBJ_2014_LOCGERM.2013.UBJ	LocalGermplasm	829	786	1	1.05471	IITA	0.000357676	0.960484	-0.23	TRUE	PASS	TRUE	PASS	nonIDM	-0.85206	ALL	PASS
logRTNO	UBJ	2015	UBJ_2015	UBJ_2015_LOCGERM.2014.UBJ	LocalGermplasm	767	735	1	1.04354	IITA	2.16927e-06	0.861242	-0.22	TRUE	PASS	TRUE	PASS	nonIDM	-2.03055	PARTITIONED	PASS
logRTNO	UBJ	2016	UBJ_2016	UBJ_2016_LOCGERM.2015.UBJ	LocalGermplasm	809	781	1	1.03585	IITA	0.00211984	0.459228	-0.35	TRUE	PASS	TRUE	PASS	ALL	-0.840155	nonIDM	PASS
logRTNO	ZAR	2006	ZAR_2006	ZAR_2006_05ggainZA	GeneticGain	487	244	2	1.9959	IITA	0.0679112	0.117549	-0.35	TRUE	PASS	TRUE	PASS	ALL	-1.85728	PARTITIONED	PASS
logRTNO	ZAR	2007	ZAR_2007	ZAR_2007_06ggainZA	GeneticGain	593	283	2	2.09541	IITA	1.47357e-05	0.939345	-0.23	TRUE	PASS	TRUE	PASS	nonIDM	-2.00579	PARTITIONED	PASS
logRTNO	ZAR	2008	ZAR_2008	ZAR_2008_07ggainZA	GeneticGain	653	310	2	2.10645	IITA	0.000142296	0.493882	-0.26	TRUE	PASS	TRUE	PASS	nonIDM	-0.0555853	ALL	PASS
logRTNO	MAL	2007	MAL_2007	MAL_2007_06ggainMM	GeneticGain	343	223	2	1.53812	IITA	0.00366877	0.701336	-0.26	TRUE	PASS	TRUE	PASS	nonIDM	-0.219176	ALL	PASS
logRTNO	MAL	2006	MAL_2006	MAL_2006_LOCGERM.2005.MAL	LocalGermplasm	132	126	1	1.04762	IITA	0.0730827	0.821318	-0.4	TRUE	PASS	TRUE	PASS	nonIDM	-0.365391	ALL	PASS
logRTNO	ONNE	2007	ONNE_2007	ONNE_2007_06ggainON	GeneticGain	300	283	1	1.06007	IITA	0.101509	0.993534	-0.19	TRUE	PASS	TRUE	PASS	nonIDM	-0.151932	ALL	PASS
logRTNO	ONNE	2008	ONNE_2008	ONNE_2008_07ggainON	GeneticGain	861	434	2	1.98387	IITA	5.18154e-05	0.497736	-0.21	TRUE	PASS	TRUE	PASS	nonIDM	-0.202409	ALL	PASS
logRTWT	IBA	2001	IBA_2001	IBA_2001_00&01GGAINIB+RVA combined	GeneticGain	771	210	2	3.67143	IITA	2.53487e-05	0.434877	-0.34	TRUE	PASS	TRUE	PASS	IID	-5.77531	nonIDM	FAIL
logRTWT	IBA	2006	IBA_2006	IBA_2006_05ggainIB	GeneticGain	822	380	2	2.16316	IITA	4.1278e-05	0.863428	-0.21	TRUE	PASS	TRUE	PASS	nonIDM	-2.02959	PARTITIONED	PASS
logRTWT	IBA	2007	IBA_2007	IBA_2007_06ggainIB	GeneticGain	809	384	2	2.10677	IITA	0.000180786	0.327996	-0.27	TRUE	PASS	TRUE	PASS	ALL	-0.740256	nonIDM	PASS
logRTWT	IBA	2012	IBA_2012	IBA_2012_11ggainIB	GeneticGain	672	613	1	1.09625	IITA	0.0311619	0.867166	-0.18	TRUE	PASS	TRUE	PASS	nonIDM	-1.15132	ALL	PASS
logRTWT	IBA	2014	IBA_2014	IBA_2014_2013.GG.IBA.harvest+preharvest	GeneticGain	711	658	1	1.08055	IITA	0.00124392	0.0306379	-0.23	TRUE	PASS	TRUE	PASS	ALL	-2.0032	PARTITIONED	PASS
logRTWT	IBA	2006	IBA_2006	IBA_2006_LOCGERM.2005.IBA	LocalGermplasm	682	609	1	1.11987	IITA	0.116627	0.00519612	-0.55	TRUE	PASS	TRUE	PASS	PARTITIONED	-0.462048	IDM	PASS
logRTWT	IBA	2007	IBA_2007	IBA_2007_LOCGERM.2006.IBA	LocalGermplasm	539	500	1	1.078	IITA	0.0238234	0.215665	-0.41	TRUE	PASS	TRUE	PASS	ALL	-1.30514	nonIDM	PASS
logRTWT	IBA	2000	IBA_2000	IBA_2000_LOCGERM.1999.IBA	LocalGermplasm	242	205	1	1.18049	IITA	0.255604	0.598637	-0.47	TRUE	PASS	TRUE	PASS	ALL	-0.223614	nonIDM	PASS
logRTWT	MOK	2006	MOK_2006	MOK_2006_05ggainMK	GeneticGain	622	307	2	2.02606	IITA	6.00752e-05	0.664246	-0.24	TRUE	PASS	TRUE	PASS	nonIDM	-0.574539	ALL	PASS
logRTWT	MOK	2007	MOK_2007	MOK_2007_06ggainMK	GeneticGain	688	320	2	2.15	IITA	0.000371932	0.424811	-0.27	TRUE	PASS	TRUE	PASS	IID	-4.73312	ALL	FAIL
logRTWT	MOK	2008	MOK_2008	MOK_2008_07ggainMK	GeneticGain	783	364	2	2.1511	IITA	0.000633802	0.829455	-0.22	TRUE	PASS	TRUE	PASS	nonIDM	-2.02162	ALL	PASS
logRTWT	MOK	2011	MOK_2011	MOK_2011_10ggainMK	GeneticGain	572	542	1	1.05535	IITA	4.12981e-06	0.890088	-0.16	TRUE	PASS	TRUE	PASS	nonIDM	-2.0191	PARTITIONED	PASS
logRTWT	MOK	2003	MOK_2003	MOK_2003_LOCGERM.2002.MOK	LocalGermplasm	206	206	1	1	IITA	0.325843	0.56378	-0.71	TRUE	PASS	TRUE	PASS	IDM	-0.632147	nonIDM	PASS
logRTWT	MOK	2005	MOK_2005	MOK_2005_LOCGERM.2004.MOK	LocalGermplasm	184	153	1	1.20261	IITA	0.0960272	0.739726	-0.44	TRUE	PASS	TRUE	PASS	nonIDM	-0.35908	ALL	PASS
logRTWT	UBJ	2006	UBJ_2006	UBJ_2006_05ggainUB	GeneticGain	726	376	2	1.93085	IITA	0.31971	0.048344	-0.65	TRUE	PASS	TRUE	PASS	IDM	-0.0201469	ALL	PASS
logRTWT	UBJ	2007	UBJ_2007	UBJ_2007_06ggainUB	GeneticGain	822	412	2	1.99515	IITA	0.000731869	0.949617	-0.19	TRUE	PASS	TRUE	PASS	IID	-5.66169	nonIDM	FAIL
logRTWT	UBJ	2008	UBJ_2008	UBJ_2008_07ggainUB	GeneticGain	921	446	2	2.06502	IITA	6.13301e-07	0.404391	-0.24	TRUE	PASS	TRUE	PASS	nonIDM	-0.966339	ALL	PASS
logRTWT	UBJ	2009	UBJ_2009	UBJ_2009_08GgainUB	GeneticGain	471	463	1	1.01728	IITA	0.0231694	0.611981	-0.18	TRUE	PASS	TRUE	PASS	ALL	-0.155204	nonIDM	PASS
logRTWT	UBJ	2010	UBJ_2010	UBJ_2010_09ggainUB	GeneticGain	624	587	1	1.06303	IITA	5.19756e-06	0.994802	-0.16	TRUE	PASS	TRUE	PASS	nonIDM	-1.95983	ALL	PASS
logRTWT	UBJ	2011	UBJ_2011	UBJ_2011_10ggainUB	GeneticGain	1270	620	2	2.04839	IITA	6.93547e-09	0.166048	-0.44	TRUE	PASS	TRUE	PASS	ALL	-1.87791	nonIDM	PASS
logRTWT	UBJ	2013	UBJ_2013	UBJ_2013_2012.GG.UBJ	GeneticGain	1323	661	2	2.00151	IITA	9.80413e-11	0.881425	-0.18	TRUE	PASS	TRUE	PASS	nonIDM	-2.02225	PARTITIONED	PASS
logRTWT	UBJ	2015	UBJ_2015	UBJ_2015_2014.GG.UBJ_preharvest_harvest data	GeneticGain	713	667	1	1.06897	IITA	7.24111e-12	0.850027	-0.16	TRUE	PASS	TRUE	PASS	nonIDM	-1.96425	PARTITIONED	PASS
logRTWT	UBJ	2001	UBJ_2001	UBJ_2001_LOCGERM.2000.UBJ	LocalGermplasm	320	267	1	1.1985	IITA	0.00089457	0.908231	-0.36	TRUE	PASS	TRUE	PASS	nonIDM	-0.852327	ALL	PASS
logRTWT	UBJ	2002	UBJ_2002	UBJ_2002_LOCGERM.2001.UBJ	LocalGermplasm	352	292	1	1.20548	IITA	0.00128676	0.249342	-0.43	TRUE	PASS	TRUE	PASS	ALL	-1.31006	nonIDM	PASS
logRTWT	UBJ	2003	UBJ_2003	UBJ_2003_LOCGERM.2002.UBJ	LocalGermplasm	512	436	1	1.17431	IITA	0.000169264	0.873639	-0.29	TRUE	PASS	TRUE	PASS	nonIDM	-1.36238	ALL	PASS
logRTWT	UBJ	2004	UBJ_2004	UBJ_2004_LOCGERM.2003.UBJ	LocalGermplasm	573	495	1	1.15758	IITA	0.000201771	0.351918	-0.34	TRUE	PASS	TRUE	PASS	ALL	-0.787438	nonIDM	PASS
logRTWT	UBJ	2005	UBJ_2005	UBJ_2005_LOCGERM.2004.UBJ	LocalGermplasm	592	561	1	1.05526	IITA	6.80089e-05	0.833059	-0.27	TRUE	PASS	TRUE	PASS	nonIDM	-1.51504	ALL	PASS
logRTWT	UBJ	2006	UBJ_2006	UBJ_2006_LOCGERM.2005.UBJ	LocalGermplasm	601	568	1	1.0581	IITA	0.00209996	0.982336	-0.29	TRUE	PASS	TRUE	PASS	nonIDM	-0.584257	ALL	PASS
logRTWT	UBJ	2007	UBJ_2007	UBJ_2007_LOCGERM.2006.UBJ	LocalGermplasm	642	606	1	1.05941	IITA	0.0272857	0.115067	-0.45	TRUE	PASS	TRUE	PASS	ALL	-1.22338	PARTITIONED	PASS
logRTWT	UBJ	2010	UBJ_2010	UBJ_2010_LOCGERM.2009.UBJ	LocalGermplasm	801	772	1	1.03756	IITA	3.99614e-08	0.849759	-0.23	TRUE	PASS	TRUE	PASS	nonIDM	-2.03588	PARTITIONED	PASS
logRTWT	UBJ	2014	UBJ_2014	UBJ_2014_LOCGERM.2013.UBJ	LocalGermplasm	829	786	1	1.05471	IITA	2.22135e-06	0.883474	-0.23	TRUE	PASS	TRUE	PASS	nonIDM	-1.9461	ALL	PASS
logRTWT	UBJ	2015	UBJ_2015	UBJ_2015_LOCGERM.2014.UBJ	LocalGermplasm	763	731	1	1.04378	IITA	2.2924e-06	0.907794	-0.22	TRUE	PASS	TRUE	PASS	nonIDM	-1.59945	ALL	PASS
logRTWT	UBJ	2016	UBJ_2016	UBJ_2016_LOCGERM.2015.UBJ	LocalGermplasm	809	781	1	1.03585	IITA	1.31493e-06	0.808306	-0.22	TRUE	PASS	TRUE	PASS	nonIDM	-2.05886	PARTITIONED	PASS
logRTWT	ZAR	2006	ZAR_2006	ZAR_2006_05ggainZA	GeneticGain	487	244	2	1.9959	IITA	0.0488892	0.280311	-0.32	TRUE	PASS	TRUE	PASS	ALL	-0.0785693	IID	PASS
logRTWT	ZAR	2007	ZAR_2007	ZAR_2007_06ggainZA	GeneticGain	593	283	2	2.09541	IITA	2.0305e-05	0.551092	-0.27	TRUE	PASS	TRUE	PASS	nonIDM	-0.474752	ALL	PASS
logRTWT	ZAR	2008	ZAR_2008	ZAR_2008_07ggainZA	GeneticGain	653	310	2	2.10645	IITA	7.64114e-06	0.943023	-0.22	TRUE	PASS	TRUE	PASS	nonIDM	-1.94693	ALL	PASS
logRTWT	MAL	2007	MAL_2007	MAL_2007_06ggainMM	GeneticGain	343	223	2	1.53812	IITA	0.0117381	0.60191	-0.27	TRUE	PASS	TRUE	PASS	ALL	-0.143405	nonIDM	PASS
logRTWT	MAL	2006	MAL_2006	MAL_2006_LOCGERM.2005.MAL	LocalGermplasm	132	126	1	1.04762	IITA	0.0055798	0.785903	-0.4	TRUE	PASS	TRUE	PASS	nonIDM	-0.0361485	ALL	PASS
logRTWT	ONNE	2007	ONNE_2007	ONNE_2007_06ggainON	GeneticGain	300	283	1	1.06007	IITA	0.61701	0.877812	-0.23	TRUE	PASS	TRUE	PASS	IID	-0.875238	nonIDM	PASS
logRTWT	ONNE	2008	ONNE_2008	ONNE_2008_07ggainON	GeneticGain	860	434	2	1.98157	IITA	8.15768e-05	0.897286	-0.19	TRUE	PASS	TRUE	PASS	nonIDM	-1.67073	ALL	PASS
logSHTWT	IBA	2001	IBA_2001	IBA_2001_00&01GGAINIB+RVA combined	GeneticGain	771	210	2	3.67143	IITA	0.00547315	0.248058	-0.45	TRUE	PASS	TRUE	PASS	IID	-8.71143	ALL	FAIL
logSHTWT	IBA	2006	IBA_2006	IBA_2006_05ggainIB	GeneticGain	821	380	2	2.16053	IITA	0.0108416	0.951513	-0.22	TRUE	PASS	TRUE	PASS	nonIDM	-0.683327	ALL	PASS
logSHTWT	IBA	2007	IBA_2007	IBA_2007_06ggainIB	GeneticGain	819	384	2	2.13281	IITA	0.00418134	0.14544	-0.3	TRUE	PASS	TRUE	PASS	ALL	-1.99718	PARTITIONED	PASS
logSHTWT	IBA	2012	IBA_2012	IBA_2012_11ggainIB	GeneticGain	682	621	1	1.09823	IITA	0.805277	0.806656	-0.28	TRUE	PASS	TRUE	PASS	IID	-0.581048	IDM	PASS
logSHTWT	IBA	2006	IBA_2006	IBA_2006_LOCGERM.2005.IBA	LocalGermplasm	712	634	1	1.12303	IITA	0.100366	0.0385012	-0.48	TRUE	PASS	TRUE	PASS	ALL	-0.848325	PARTITIONED	PASS
logSHTWT	IBA	2007	IBA_2007	IBA_2007_LOCGERM.2006.IBA	LocalGermplasm	591	549	1	1.0765	IITA	3.73459e-06	0.799242	-0.24	TRUE	PASS	TRUE	PASS	nonIDM	-2.06468	PARTITIONED	PASS
logSHTWT	MOK	2006	MOK_2006	MOK_2006_05ggainMK	GeneticGain	622	307	2	2.02606	IITA	0.130404	0.818025	-0.26		FAIL	FALSE	FAIL	ALL	-0.0175044	nonIDM	PASS
logSHTWT	MOK	2007	MOK_2007	MOK_2007_06ggainMK	GeneticGain	339	315	1	1.07619	IITA	0.0434926	0.163439	-0.28	TRUE	PASS	TRUE	PASS	ALL	-1.82806	nonIDM	PASS
logSHTWT	MOK	2008	MOK_2008	MOK_2008_07ggainMK	GeneticGain	381	350	1	1.08857	IITA	0.0212937	0.021481	-0.34	TRUE	PASS	TRUE	PASS	ALL	-1.2859	PARTITIONED	PASS
logSHTWT	MOK	2011	MOK_2011	MOK_2011_10ggainMK	GeneticGain	581	551	1	1.05445	IITA	0.204002	0.330044	-0.26	TRUE	PASS	TRUE	PASS	ALL	-0.812744	nonIDM	PASS
logSHTWT	MOK	2005	MOK_2005	MOK_2005_LOCGERM.2004.MOK	LocalGermplasm	181	151	1	1.19868	IITA	0.558136	0.746298	-0.5	TRUE	PASS	TRUE	PASS	nonIDM	-0.0930218	ALL	PASS
logSHTWT	UBJ	2006	UBJ_2006	UBJ_2006_05ggainUB	GeneticGain	724	377	2	1.92042	IITA	0.00831096	0.152047	-0.41	TRUE	PASS	TRUE	PASS	ALL	-1.91163	PARTITIONED	PASS
logSHTWT	UBJ	2007	UBJ_2007	UBJ_2007_06ggainUB	GeneticGain	821	412	2	1.99272	IITA	0.015508	0.127414	-0.39	TRUE	PASS	TRUE	PASS	ALL	-1.91756	PARTITIONED	PASS
logSHTWT	UBJ	2008	UBJ_2008	UBJ_2008_07ggainUB	GeneticGain	457	433	1	1.05543	IITA	0.00290507	0.741605	-0.18	TRUE	PASS	TRUE	PASS	nonIDM	-0.152355	ALL	PASS
logSHTWT	UBJ	2009	UBJ_2009	UBJ_2009_08GgainUB	GeneticGain	471	463	1	1.01728	IITA	0.0893306	0.693582	-0.19	TRUE	PASS	TRUE	PASS	ALL	-0.122454	nonIDM	PASS
logSHTWT	UBJ	2010	UBJ_2010	UBJ_2010_09ggainUB	GeneticGain	625	588	1	1.06293	IITA	0.00229048	0.884169	-0.16	TRUE	PASS	TRUE	PASS	nonIDM	-0.693778	ALL	PASS
logSHTWT	UBJ	2011	UBJ_2011	UBJ_2011_10ggainUB	GeneticGain	1272	620	2	2.05161	IITA	4.66732e-09	0.0015169	-0.52	TRUE	PASS	TRUE	PASS	ALL	-1.28255	PARTITIONED	PASS
logSHTWT	UBJ	2013	UBJ_2013	UBJ_2013_2012.GG.UBJ	GeneticGain	1326	662	2	2.00302	IITA	1.47643e-08	0.0110106	-0.37	TRUE	PASS	TRUE	PASS	ALL	-1.98331	PARTITIONED	PASS
logSHTWT	UBJ	2015	UBJ_2015	UBJ_2015_2014.GG.UBJ_preharvest_harvest data	GeneticGain	715	669	1	1.06876	IITA	4.30012e-06	0.206119	-0.22	TRUE	PASS	TRUE	PASS	ALL	-1.45881	nonIDM	PASS
logSHTWT	UBJ	2001	UBJ_2001	UBJ_2001_LOCGERM.2000.UBJ	LocalGermplasm	321	268	1	1.19776	IITA	0.0011239	0.796403	-0.37	TRUE	PASS	TRUE	PASS	nonIDM	-0.922158	ALL	PASS
logSHTWT	UBJ	2002	UBJ_2002	UBJ_2002_LOCGERM.2001.UBJ	LocalGermplasm	353	293	1	1.20478	IITA	0.312293	0.145411	-0.6	TRUE	PASS	TRUE	PASS	IDM	-0.236337	ALL	PASS
logSHTWT	UBJ	2003	UBJ_2003	UBJ_2003_LOCGERM.2002.UBJ	LocalGermplasm	521	445	1	1.17079	IITA	0.00912811	0.809094	-0.28	TRUE	PASS	TRUE	PASS	nonIDM	-1.3015	ALL	PASS
logSHTWT	UBJ	2004	UBJ_2004	UBJ_2004_LOCGERM.2003.UBJ	LocalGermplasm	595	515	1	1.15534	IITA	0.000326207	0.793164	-0.28	TRUE	PASS	TRUE	PASS	nonIDM	-1.43142	ALL	PASS
logSHTWT	UBJ	2005	UBJ_2005	UBJ_2005_LOCGERM.2004.UBJ	LocalGermplasm	606	576	1	1.05208	IITA	0.0666277	0.330965	-0.38	TRUE	PASS	TRUE	PASS	ALL	-0.890689	nonIDM	PASS
logSHTWT	UBJ	2006	UBJ_2006	UBJ_2006_LOCGERM.2005.UBJ	LocalGermplasm	599	566	1	1.0583	IITA	0.010532	0.829464	-0.32	TRUE	PASS	TRUE	PASS	nonIDM	-0.643304	ALL	PASS
logSHTWT	UBJ	2007	UBJ_2007	UBJ_2007_LOCGERM.2006.UBJ	LocalGermplasm	659	620	1	1.0629	IITA	0.338768	0.0621552	-0.53	TRUE	PASS	TRUE	PASS	IDM	-0.731216	ALL	PASS
logSHTWT	UBJ	2010	UBJ_2010	UBJ_2010_LOCGERM.2009.UBJ	LocalGermplasm	801	773	1	1.03622	IITA	0.000555517	0.163088	-0.43	TRUE	PASS	TRUE	PASS	ALL	-1.48644	nonIDM	PASS
logSHTWT	UBJ	2014	UBJ_2014	UBJ_2014_LOCGERM.2013.UBJ	LocalGermplasm	833	790	1	1.05443	IITA	1.80749e-05	0.938774	-0.22	TRUE	PASS	TRUE	PASS	nonIDM	-1.36035	ALL	PASS
logSHTWT	UBJ	2015	UBJ_2015	UBJ_2015_LOCGERM.2014.UBJ	LocalGermplasm	821	788	1	1.04188	IITA	0.0017345	0.903825	-0.24	TRUE	PASS	TRUE	PASS	nonIDM	-0.989715	ALL	PASS
logSHTWT	UBJ	2016	UBJ_2016	UBJ_2016_LOCGERM.2015.UBJ	LocalGermplasm	812	784	1	1.03571	IITA	2.95677e-05	0.891203	-0.22	TRUE	PASS	TRUE	PASS	nonIDM	-1.14539	ALL	PASS
logSHTWT	ZAR	2006	ZAR_2006	ZAR_2006_05ggainZA	GeneticGain	251	234	1	1.07265	IITA	0.975746	0.452824	-0.34	TRUE	PASS	TRUE	PASS	IDM	-0.452997	ALL	PASS
logSHTWT	ZAR	2007	ZAR_2007	ZAR_2007_06ggainZA	GeneticGain	293	280	1	1.04643	IITA	0.505162	0.155553	-0.39	TRUE	PASS	TRUE	PASS	IDM	-0.35204	ALL	PASS
logSHTWT	ZAR	2008	ZAR_2008	ZAR_2008_07ggainZA	GeneticGain	654	310	2	2.10968	IITA	0.0121496	0.952127	-0.23	TRUE	PASS	TRUE	PASS	nonIDM	-0.818295	ALL	PASS
logSHTWT	MAL	2007	MAL_2007	MAL_2007_06ggainMM	GeneticGain	215	208	1	1.03365	IITA	0.743552	0.567495	-0.28	TRUE	PASS	TRUE	PASS	IID	-0.849467	IDM	PASS
logSHTWT	MAL	2006	MAL_2006	MAL_2006_LOCGERM.2005.MAL	LocalGermplasm	131	125	1	1.048	IITA	0.603947	0.759635	-0.44	TRUE	PASS	TRUE	PASS	ALL	-0.0819469	nonIDM	PASS
logSHTWT	ONNE	2007	ONNE_2007	ONNE_2007_06ggainON	GeneticGain	300	283	1	1.06007	IITA	0.00408882	0.497864	-0.21	TRUE	PASS	TRUE	PASS	IID	-0.0144648	ALL	PASS
logSHTWT	ONNE	2008	ONNE_2008	ONNE_2008_07ggainON	GeneticGain	432	419	1	1.03103	IITA	0.0972395	0.65307	-0.2	TRUE	PASS	TRUE	PASS	ALL	-0.196578	nonIDM	PASS
HI	IBA	2001	IBA_2001	IBA_2001_00&01GGAINIB+RVA combined	GeneticGain	771	210	2	3.67143	IITA	0.000308218	0.280607	-0.45	TRUE	PASS	TRUE	PASS	IID	-3.99339	ALL	FAIL
HI	IBA	2006	IBA_2006	IBA_2006_05ggainIB	GeneticGain	820	380	2	2.15789	IITA	5.53127e-05	0.646888	-0.24	TRUE	PASS	TRUE	PASS	IID	-3.28521	nonIDM	FAIL
HI	IBA	2007	IBA_2007	IBA_2007_06ggainIB	GeneticGain	809	384	2	2.10677	IITA	0.00193922	0.879768	-0.21	TRUE	PASS	TRUE	PASS	IID	-11.1855	nonIDM	FAIL
HI	IBA	2012	IBA_2012	IBA_2012_11ggainIB	GeneticGain	671	612	1	1.09641	IITA	0.217637	0.870092	-0.21	TRUE	PASS	TRUE	PASS	nonIDM	-0.713991	ALL	PASS
HI	IBA	2006	IBA_2006	IBA_2006_LOCGERM.2005.IBA	LocalGermplasm	681	609	1	1.11823	IITA	0.006498	0.642451	-0.28	TRUE	PASS	TRUE	PASS	nonIDM	-0.0440637	ALL	PASS
HI	MOK	2006	MOK_2006	MOK_2006_05ggainMK	GeneticGain	622	307	2	2.02606	IITA	0.00507918	0.150054	-0.33	TRUE	PASS	TRUE	PASS	ALL	-1.95291	PARTITIONED	PASS
HI	MOK	2007	MOK_2007	MOK_2007_06ggainMK	GeneticGain	339	315	1	1.07619	IITA	0.881741	0.00288816	-0.63	TRUE	PASS	TRUE	PASS	IDM	-1.97787	PARTITIONED	PASS
HI	MOK	2008	MOK_2008	MOK_2008_07ggainMK	GeneticGain	381	350	1	1.08857	IITA	0.00347507	0.568485	-0.2	TRUE	PASS	TRUE	PASS	ALL	-0.127579	nonIDM	PASS
HI	MOK	2011	MOK_2011	MOK_2011_10ggainMK	GeneticGain	572	542	1	1.05535	IITA	0.000623852	0.491214	-0.22	TRUE	PASS	TRUE	PASS	ALL	-0.340621	nonIDM	PASS
HI	MOK	2005	MOK_2005	MOK_2005_LOCGERM.2004.MOK	LocalGermplasm	181	151	1	1.19868	IITA	0.0498669	0.776757	-0.41	TRUE	PASS	TRUE	PASS	nonIDM	-0.533426	ALL	PASS
HI	UBJ	2006	UBJ_2006	UBJ_2006_05ggainUB	GeneticGain	721	376	2	1.91755	IITA	0.000548648	0.219259	-0.29	TRUE	PASS	TRUE	PASS	ALL	-1.3337	nonIDM	PASS
HI	UBJ	2007	UBJ_2007	UBJ_2007_06ggainUB	GeneticGain	820	412	2	1.99029	IITA	0.516622	0.488023	-0.66	TRUE	PASS	TRUE	PASS	IID	-3.95041	ALL	FAIL
HI	UBJ	2008	UBJ_2008	UBJ_2008_07ggainUB	GeneticGain	456	432	1	1.05556	IITA	0.0123606	0.148307	-0.23	TRUE	PASS	TRUE	PASS	ALL	-1.99163	PARTITIONED	PASS
HI	UBJ	2009	UBJ_2009	UBJ_2009_08GgainUB	GeneticGain	471	463	1	1.01728	IITA	0.305362	0.14352	-0.37	TRUE	PASS	TRUE	PASS	ALL	-0.342606	IDM	PASS
HI	UBJ	2010	UBJ_2010	UBJ_2010_09ggainUB	GeneticGain	624	587	1	1.06303	IITA	8.17165e-06	0.0133955	-0.29	TRUE	PASS	TRUE	PASS	ALL	-1.98959	PARTITIONED	PASS
HI	UBJ	2011	UBJ_2011	UBJ_2011_10ggainUB	GeneticGain	1270	620	2	2.04839	IITA	2.96387e-11	0.0107919	-0.35	TRUE	PASS	TRUE	PASS	PARTITIONED	-0.624304	ALL	PASS
HI	UBJ	2013	UBJ_2013	UBJ_2013_2012.GG.UBJ	GeneticGain	1323	661	2	2.00151	IITA	1.71004e-10	0.0546757	-0.33	TRUE	PASS	TRUE	PASS	ALL	-0.332691	PARTITIONED	PASS
HI	UBJ	2015	UBJ_2015	UBJ_2015_2014.GG.UBJ_preharvest_harvest data	GeneticGain	713	667	1	1.06897	IITA	0.000120169	0.00502179	-0.27	TRUE	PASS	TRUE	PASS	ALL	-1.86595	PARTITIONED	PASS
HI	UBJ	2001	UBJ_2001	UBJ_2001_LOCGERM.2000.UBJ	LocalGermplasm	320	267	1	1.1985	IITA	7.7807e-06	0.785671	-0.37	TRUE	PASS	TRUE	PASS	nonIDM	-1.78171	ALL	PASS
HI	UBJ	2002	UBJ_2002	UBJ_2002_LOCGERM.2001.UBJ	LocalGermplasm	352	292	1	1.20548	IITA	0.00810179	0.826981	-0.35	TRUE	PASS	TRUE	PASS	nonIDM	-0.787032	ALL	PASS
HI	UBJ	2003	UBJ_2003	UBJ_2003_LOCGERM.2002.UBJ	LocalGermplasm	495	420	1	1.17857	IITA	2.33189e-06	0.814832	-0.27	TRUE	PASS	TRUE	PASS	nonIDM	-2.05485	PARTITIONED	PASS
HI	UBJ	2004	UBJ_2004	UBJ_2004_LOCGERM.2003.UBJ	LocalGermplasm	573	495	1	1.15758	IITA	0.00355762	0.219359	-0.41	TRUE	PASS	TRUE	PASS	ALL	-1.50729	nonIDM	PASS
HI	UBJ	2005	UBJ_2005	UBJ_2005_LOCGERM.2004.UBJ	LocalGermplasm	588	558	1	1.05376	IITA	0.000189116	0.354358	-0.33	TRUE	PASS	TRUE	PASS	ALL	-0.809988	nonIDM	PASS
HI	UBJ	2006	UBJ_2006	UBJ_2006_LOCGERM.2005.UBJ	LocalGermplasm	588	555	1	1.05946	IITA	5.54249e-05	0.721362	-0.29	TRUE	PASS	TRUE	PASS	nonIDM	-0.369446	ALL	PASS
HI	UBJ	2007	UBJ_2007	UBJ_2007_LOCGERM.2006.UBJ	LocalGermplasm	642	605	1	1.06116	IITA	0.01001	0.922905	-0.29	TRUE	PASS	TRUE	PASS	nonIDM	-0.148265	ALL	PASS
HI	UBJ	2010	UBJ_2010	UBJ_2010_LOCGERM.2009.UBJ	LocalGermplasm	794	766	1	1.03655	IITA	3.92697e-10	0.982215	-0.21	TRUE	PASS	TRUE	PASS	nonIDM	-1.45849	ALL	PASS
HI	ZAR	2006	ZAR_2006	ZAR_2006_05ggainZA	GeneticGain	250	233	1	1.07296	IITA	0.158571	0.97727	-0.2	TRUE	PASS	TRUE	PASS	nonIDM	-0.275979	ALL	PASS
HI	ZAR	2007	ZAR_2007	ZAR_2007_06ggainZA	GeneticGain	293	280	1	1.04643	IITA	0.000432933	0.939547	-0.18	TRUE	PASS	TRUE	PASS	nonIDM	-1.43713	ALL	PASS
HI	ZAR	2008	ZAR_2008	ZAR_2008_07ggainZA	GeneticGain	653	310	2	2.10645	IITA	2.27286e-05	0.78819	-0.24	TRUE	PASS	TRUE	PASS	nonIDM	-0.886231	ALL	PASS
HI	MAL	2007	MAL_2007	MAL_2007_06ggainMM	GeneticGain	215	208	1	1.03365	IITA	0.00163794	0.359653	-0.24	TRUE	PASS	TRUE	PASS	ALL	-0.809033	nonIDM	PASS
HI	MAL	2006	MAL_2006	MAL_2006_LOCGERM.2005.MAL	LocalGermplasm	131	125	1	1.048	IITA	0.00555957	0.811107	-0.39	TRUE	PASS	TRUE	PASS	nonIDM	-0.771628	ALL	PASS
HI	ONNE	2007	ONNE_2007	ONNE_2007_06ggainON	GeneticGain	300	283	1	1.06007	IITA	0.00360442	0.32235	-0.22	TRUE	PASS	TRUE	PASS	ALL	-0.927938	nonIDM	PASS
HI	ONNE	2008	ONNE_2008	ONNE_2008_07ggainON	GeneticGain	432	419	1	1.03103	IITA	0.05401	0.489653	-0.23	TRUE	PASS	TRUE	PASS	ALL	-0.484787	nonIDM	PASS
DM	IBA	2001	IBA_2001	IBA_2001_00&01GGAINIB+RVA combined	GeneticGain	753	209	2	3.60287	IITA	0.150262	0.00225476	-0.68	TRUE	PASS	TRUE	PASS	PARTITIONED	-0.0695881	IDM	PASS
DM	IBA	2006	IBA_2006	IBA_2006_05ggainIB	GeneticGain	750	378	2	1.98413	IITA	0.0100513	0.00160405	-0.6	TRUE	PASS	TRUE	PASS	ALL	-1.24756	PARTITIONED	PASS
DM	IBA	2007	IBA_2007	IBA_2007_06ggainIB	GeneticGain	772	382	2	2.02094	IITA	0.00342524	0.0476081	-0.42	TRUE	PASS	TRUE	PASS	ALL	-1.82152	PARTITIONED	PASS
DM	IBA	2012	IBA_2012	IBA_2012_11ggainIB	GeneticGain	508	487	1	1.04312	IITA	1.68903e-07	0.00882194	-0.24	TRUE	PASS	TRUE	PASS	ALL	-1.89966	PARTITIONED	PASS
DM	IBA	2014	IBA_2014	IBA_2014_2013.GG.IBA.harvest+preharvest	GeneticGain	701	648	1	1.08179	IITA	1.36563e-12	1.51059e-06	-0.32	TRUE	PASS	TRUE	PASS	ALL	-1.99077	PARTITIONED	PASS
DM	IBA	2006	IBA_2006	IBA_2006_LOCGERM.2005.IBA	LocalGermplasm	459	399	1	1.15038	IITA	0.00181522	0.131924	-0.4	TRUE	PASS	TRUE	PASS	ALL	-1.99218	PARTITIONED	PASS
DM	IBA	2007	IBA_2007	IBA_2007_LOCGERM.2006.IBA	LocalGermplasm	402	372	1	1.08065	IITA	1.14229e-06	0.999966	-0.25	TRUE	PASS	TRUE	PASS	nonIDM	-1.161	ALL	PASS
DM	IBA	2000	IBA_2000	IBA_2000_LOCGERM.1999.IBA	LocalGermplasm	224	189	1	1.18519	IITA	0.00188431	0.784674	-0.37	TRUE	PASS	TRUE	PASS	nonIDM	-1.0331	ALL	PASS
DM	MOK	2006	MOK_2006	MOK_2006_05ggainMK	GeneticGain	319	295	1	1.08136	IITA	0.169934	0.211648	-0.31	TRUE	PASS	TRUE	PASS	ALL	-1.13965	nonIDM	PASS
DM	MOK	2007	MOK_2007	MOK_2007_06ggainMK	GeneticGain	327	304	1	1.07566	IITA	0.00210439	0.982841	-0.19	TRUE	PASS	TRUE	PASS	nonIDM	-0.944385	ALL	PASS
DM	MOK	2008	MOK_2008	MOK_2008_07ggainMK	GeneticGain	356	328	1	1.08537	IITA	0.00151617	0.270977	-0.21	TRUE	PASS	TRUE	PASS	ALL	-1.11181	nonIDM	PASS
DM	MOK	2003	MOK_2003	MOK_2003_LOCGERM.2002.MOK	LocalGermplasm	232	231	1	1.00433	IITA	0.0189027	0.897498	-0.31	TRUE	PASS	TRUE	PASS	nonIDM	-0.68552	ALL	PASS
DM	MOK	2005	MOK_2005	MOK_2005_LOCGERM.2004.MOK	LocalGermplasm	167	141	1	1.1844	IITA	0.00996222	0.788204	-0.41	TRUE	PASS	TRUE	PASS	nonIDM	-0.855991	ALL	PASS
DM	UBJ	2006	UBJ_2006	UBJ_2006_05ggainUB	GeneticGain	371	356	1	1.04213	IITA	0.455168	0.172624	-0.3	TRUE	PASS	TRUE	PASS	ALL	-0.0548929	IDM	PASS
DM	UBJ	2007	UBJ_2007	UBJ_2007_06ggainUB	GeneticGain	397	386	1	1.0285	IITA	0.0328811	0.790105	-0.17	TRUE	PASS	TRUE	PASS	ALL	-1.96617	nonIDM	PASS
DM	UBJ	2008	UBJ_2008	UBJ_2008_07ggainUB	GeneticGain	421	400	1	1.0525	IITA	0.891832	0.172722	-0.33	TRUE	PASS	TRUE	PASS	IDM	-0.877551	ALL	PASS
DM	UBJ	2009	UBJ_2009	UBJ_2009_08GgainUB	GeneticGain	471	463	1	1.01728	IITA	0.000505344	0.0383728	-0.24	TRUE	PASS	TRUE	PASS	ALL	-1.99138	PARTITIONED	PASS
DM	UBJ	2010	UBJ_2010	UBJ_2010_09ggainUB	GeneticGain	625	588	1	1.06293	IITA	7.96659e-06	0.0004565	-0.44	TRUE	PASS	TRUE	PASS	ALL	-5.80709	PARTITIONED	PASS
DM	UBJ	2015	UBJ_2015	UBJ_2015_2014.GG.UBJ_preharvest_harvest data	GeneticGain	674	631	1	1.06815	IITA	8.85947e-10	0.0576127	-0.23	TRUE	PASS	TRUE	PASS	ALL	-1.48406	PARTITIONED	PASS
DM	UBJ	2001	UBJ_2001	UBJ_2001_LOCGERM.2000.UBJ	LocalGermplasm	319	266	1	1.19925	IITA	0.00967471	0.857451	-0.36	TRUE	PASS	TRUE	PASS	nonIDM	-0.684663	ALL	PASS
DM	UBJ	2002	UBJ_2002	UBJ_2002_LOCGERM.2001.UBJ	LocalGermplasm	343	285	1	1.20351	IITA	0.000240453	0.797334	-0.35	TRUE	PASS	TRUE	PASS	nonIDM	-1.27371	ALL	PASS
DM	UBJ	2004	UBJ_2004	UBJ_2004_LOCGERM.2003.UBJ	LocalGermplasm	563	486	1	1.15844	IITA	0.000121817	0.685529	-0.31	TRUE	PASS	TRUE	PASS	nonIDM	-0.113729	ALL	PASS
DM	UBJ	2005	UBJ_2005	UBJ_2005_LOCGERM.2004.UBJ	LocalGermplasm	593	562	1	1.05516	IITA	0.00296395	0.765614	-0.31	TRUE	PASS	TRUE	PASS	nonIDM	-1.08072	ALL	PASS
DM	UBJ	2006	UBJ_2006	UBJ_2006_LOCGERM.2005.UBJ	LocalGermplasm	601	567	1	1.05996	IITA	0.040817	0.449315	-0.45	TRUE	PASS	TRUE	PASS	ALL	-0.447987	nonIDM	PASS
DM	UBJ	2007	UBJ_2007	UBJ_2007_LOCGERM.2006.UBJ	LocalGermplasm	579	548	1	1.05657	IITA	0.00156	0.595744	-0.3	TRUE	PASS	TRUE	PASS	ALL	-0.177607	nonIDM	PASS
DM	UBJ	2010	UBJ_2010	UBJ_2010_LOCGERM.2009.UBJ	LocalGermplasm	750	721	1	1.04022	IITA	6.44661e-06	0.119547	-0.36	TRUE	PASS	TRUE	PASS	ALL	-1.98565	PARTITIONED	PASS
DM	UBJ	2014	UBJ_2014	UBJ_2014_LOCGERM.2013.UBJ	LocalGermplasm	745	704	1	1.05824	IITA	1.60709e-11	0.277082	-0.37	TRUE	PASS	TRUE	PASS	ALL	-1.17139	nonIDM	PASS
DM	UBJ	2015	UBJ_2015	UBJ_2015_LOCGERM.2014.UBJ	LocalGermplasm	614	584	1	1.05137	IITA	1.05672e-07	0.0174326	-0.45	TRUE	PASS	TRUE	PASS	ALL	-1.86378	PARTITIONED	PASS
DM	UBJ	2016	UBJ_2016	UBJ_2016_LOCGERM.2015.UBJ	LocalGermplasm	802	774	1	1.03618	IITA	1.47741e-12	0.0582257	-0.36	TRUE	PASS	TRUE	PASS	ALL	-1.72768	PARTITIONED	PASS
DM	ZAR	2006	ZAR_2006	ZAR_2006_05ggainZA	GeneticGain	221	212	1	1.04245	IITA	0.160833	0.0173589	-0.44	TRUE	PASS	TRUE	PASS	IDM	-0.0336242	PARTITIONED	PASS
DM	ZAR	2007	ZAR_2007	ZAR_2007_06ggainZA	GeneticGain	285	272	1	1.04779	IITA	0.0109111	0.250277	-0.23	TRUE	PASS	TRUE	PASS	ALL	-1.2966	nonIDM	PASS
DM	MAL	2007	MAL_2007	MAL_2007_06ggainMM	GeneticGain	192	186	1	1.03226	IITA	0.0369923	0.882774	-0.2	TRUE	PASS	TRUE	PASS	nonIDM	-0.150535	ALL	PASS
DM	MAL	2006	MAL_2006	MAL_2006_LOCGERM.2005.MAL	LocalGermplasm	123	117	1	1.05128	IITA	0.999098	0.998797	-0.56	TRUE	PASS	TRUE	PASS	IID	-1.0573	IDM	PASS
DM	ONNE	2007	ONNE_2007	ONNE_2007_06ggainON	GeneticGain	293	276	1	1.06159	IITA	0.00246838	0.0892514	-0.24	TRUE	PASS	TRUE	PASS	ALL	-1.99615	PARTITIONED	PASS
DM	ONNE	2008	ONNE_2008	ONNE_2008_07ggainON	GeneticGain	429	416	1	1.03125	IITA	0.00179894	0.770311	-0.16	TRUE	PASS	TRUE	PASS	nonIDM	-0.310324	ALL	PASS
logRTWT	umu	2012	umu:2012	tp1:umu:2012:set1		1385	472	3	2.93432	NRCRI	0.00190912	0.917823	-0.19	TRUE	PASS	TRUE	PASS	nonIDM	-1.05904	ALL	PASS
logRTWT	kano	2013	kano:2013	tp1:kano:2013:set1		567	223	3	2.5426	NRCRI	0.0139854	0.351596	-0.39	TRUE	PASS	TRUE	PASS	ALL	-0.867676	nonIDM	PASS
logRTWT	oto	2013	oto:2013	tp1:oto:2013:set1		574	227	3	2.52863	NRCRI	0.0771136	0.974572	-0.27	TRUE	PASS	FALSE	FAIL	IID	-6.15332	nonIDM	FAIL
logRTWT	umu	2014	umu:2014	tp1:umu:2014:set1		589	230	3	2.56087	NRCRI	0.0227526	0.265292	-0.37	TRUE	PASS	TRUE	PASS	IID	-3.71805	ALL	FAIL
logRTWT	umu	2014	umu:2014	tp2:umu:2014:set4		287	107	3	2.68224	NRCRI	0.14543	0.749935	-0.31	TRUE	PASS	TRUE	PASS	IID	-11.5598	nonIDM	FAIL
logRTWT	oto	2014	oto:2014	tp1:oto:2014:set1		571	219	3	2.60731	NRCRI	0.178831	0.908838	-0.28		FAIL	FALSE	FAIL	nonIDM	-0.317372	ALL	PASS
logRTWT	umu	2013	umu:2013	tp1:umu:2013:set1		565	226	3	2.5	NRCRI	0.000406726	0.429044	-0.38	TRUE	PASS	TRUE	PASS	ALL	-0.492028	nonIDM	PASS
logRTWT	umu	2013	umu:2013	tp2:umu:2013:set4		246	107	3	2.29907	NRCRI	0.2072	0.551186	-0.38	TRUE	PASS	TRUE	PASS	ALL	-0.3429	nonIDM	PASS
logRTWT	kano	2014	kano:2014	tp1:kano:2014:set1		142	140	1	1.01429	NRCRI	0.931117	0.350187	-0.35	TRUE	PASS	TRUE	PASS	IDM	-0.872296	ALL	PASS
logRTWT	umu	2013	umu:2013	tp2:umu:2013:set2		323	114	3	2.83333	NRCRI	0.0501676	0.99556	-0.32	TRUE	PASS	TRUE	PASS	nonIDM	-0.169195	ALL	PASS
logRTWT	umu	2014	umu:2014	tp2:umu:2014:set2		314	112	3	2.80357	NRCRI	0.0161202	0.874024	-0.35	TRUE	PASS	TRUE	PASS	nonIDM	-0.272198	ALL	PASS
logRTWT	kano	2014	kano:2014	tp1:kano:2014:set2		266	184	3	1.44565	NRCRI	0.787874	0.788778	-0.27		FAIL	FALSE	FAIL	IID	-0.318274	IDM	PASS
logRTWT	umu	2014	umu:2014	tp1:umu:2014:set2		608	216	3	2.81481	NRCRI	0.00932351	0.939482	-0.22	TRUE	PASS	TRUE	PASS	IID	-14.8233	nonIDM	FAIL
logRTWT	kano	2013	kano:2013	tp1:kano:2013:set2		540	236	3	2.28814	NRCRI	0.0223729	0.996799	-0.22	TRUE	PASS	TRUE	PASS	nonIDM	-0.477309	ALL	PASS
logRTWT	oto	2014	oto:2014	tp1:oto:2014:set2		650	237	3	2.74262	NRCRI	0.546671	0.820338	-0.25		FAIL	FALSE	FAIL	IID	-1.33207	nonIDM	PASS
logRTWT	umu	2014	umu:2014	tp2:umu:2014:set1		334	115	3	2.90435	NRCRI	5.81442e-05	0.749698	-0.31	TRUE	PASS	TRUE	PASS	nonIDM	-0.783472	ALL	PASS
logRTWT	umu	2014	umu:2014	tp2:umu:2014:set3		243	97	3	2.50515	NRCRI	0.0596498	0.992097	-0.35	TRUE	PASS	TRUE	PASS	nonIDM	-0.268648	ALL	PASS
logRTWT	umu	2013	umu:2013	tp2:umu:2013:set3		288	110	3	2.61818	NRCRI	0.0157748	0.769972	-0.31	TRUE	PASS	TRUE	PASS	IID	-0.0679728	nonIDM	PASS
logRTWT	umu	2013	umu:2013	tp2:umu:2013:set1		302	114	3	2.64912	NRCRI	0.0136466	0.728997	-0.32	TRUE	PASS	TRUE	PASS	nonIDM	-0.154089	ALL	PASS
logRTWT	oto	2013	oto:2013	tp1:oto:2013:set2		572	236	3	2.42373	NRCRI	0.000740895	0.833387	-0.22	TRUE	PASS	TRUE	PASS	nonIDM	-1.94024	ALL	PASS
logRTWT	umu	2013	umu:2013	tp1:umu:2013:set2		551	223	3	2.47085	NRCRI	0.609843	0.610238	-0.25		FAIL	FALSE	FAIL	IID	-3.41968	IDM	FAIL
logRTNO	umu	2012	umu:2012	tp1:umu:2012:set1		1385	472	3	2.93432	NRCRI	0.00408598	0.133931	-0.3	TRUE	PASS	TRUE	PASS	IID	-1.12481	ALL	PASS
logRTNO	kano	2013	kano:2013	tp1:kano:2013:set1		567	223	3	2.5426	NRCRI	0.313828	0.104761	-0.55	TRUE	PASS	TRUE	PASS	ALL	-0.272234	IDM	PASS
logRTNO	umu	2014	umu:2014	tp1:umu:2014:set1		589	230	3	2.56087	NRCRI	0.0540185	0.178588	-0.4	TRUE	PASS	TRUE	PASS	IID	-19.218	ALL	FAIL
logRTNO	umu	2014	umu:2014	tp2:umu:2014:set4		287	107	3	2.68224	NRCRI	0.0780118	0.681449	-0.33	TRUE	PASS	TRUE	PASS	IID	-5.58044	ALL	FAIL
logRTNO	oto	2014	oto:2014	tp1:oto:2014:set1		571	219	3	2.60731	NRCRI	0.032605	0.822911	-0.27	TRUE	PASS	TRUE	PASS	nonIDM	-0.890253	ALL	PASS
logRTNO	umu	2013	umu:2013	tp1:umu:2013:set1		603	227	3	2.65639	NRCRI	0.122661	0.888035	-0.28		FAIL	FALSE	FAIL	nonIDM	-0.47016	ALL	PASS
logRTNO	umu	2013	umu:2013	tp2:umu:2013:set4		246	107	3	2.29907	NRCRI	0.484847	0.943182	-0.32		FAIL	FALSE	FAIL	nonIDM	-0.0157738	ALL	PASS
logRTNO	kano	2014	kano:2014	tp1:kano:2014:set1		142	140	1	1.01429	NRCRI	0.978994	0.906985	-0.29	TRUE	PASS	TRUE	PASS	IID	-0.0234213	IDM	PASS
logRTNO	umu	2013	umu:2013	tp2:umu:2013:set2		322	114	3	2.82456	NRCRI	0.808069	0.00339419	-0.79	TRUE	PASS	TRUE	PASS	IDM	-1.94099	PARTITIONED	PASS
logRTNO	umu	2014	umu:2014	tp2:umu:2014:set2		314	112	3	2.80357	NRCRI	0.00628745	0.95723	-0.33	TRUE	PASS	TRUE	PASS	nonIDM	-0.605967	ALL	PASS
logRTNO	kano	2014	kano:2014	tp1:kano:2014:set2		265	184	3	1.44022	NRCRI	0.773591	0.774394	-0.27		FAIL	FALSE	FAIL	IDM	-0.000153555	ALL	PASS
logRTNO	umu	2014	umu:2014	tp1:umu:2014:set2		607	216	3	2.81019	NRCRI	0.00990759	0.994487	-0.23	TRUE	PASS	TRUE	PASS	IID	-18.6979	nonIDM	FAIL
logRTNO	kano	2013	kano:2013	tp1:kano:2013:set2		540	236	3	2.28814	NRCRI	0.118247	0.325054	-0.3	TRUE	PASS	TRUE	PASS	ALL	-0.0352578	IID	PASS
logRTNO	oto	2014	oto:2014	tp1:oto:2014:set2		649	237	3	2.7384	NRCRI	0.964646	0.903569	-0.28		FAIL	FALSE	FAIL	IID	-0.418964	nonIDM	PASS
logRTNO	umu	2014	umu:2014	tp2:umu:2014:set1		337	116	3	2.90517	NRCRI	4.92415e-06	0.879191	-0.38	TRUE	PASS	TRUE	PASS	nonIDM	-0.716312	ALL	PASS
logRTNO	umu	2014	umu:2014	tp2:umu:2014:set3		242	97	3	2.49485	NRCRI	0.238921	0.771765	-0.38	TRUE	PASS	TRUE	PASS	nonIDM	-0.0645375	ALL	PASS
logRTNO	umu	2013	umu:2013	tp2:umu:2013:set3		287	110	3	2.60909	NRCRI	0.507595	0.930922	-0.34		FAIL	FALSE	FAIL	nonIDM	-0.00189781	ALL	PASS
logRTNO	umu	2013	umu:2013	tp2:umu:2013:set1		302	114	3	2.64912	NRCRI	0.0953377	0.454991	-0.37	TRUE	PASS	TRUE	PASS	ALL	-0.558236	nonIDM	PASS
logRTNO	oto	2013	oto:2013	tp1:oto:2013:set2		571	236	3	2.41949	NRCRI	0.03123	0.882756	-0.22	TRUE	PASS	TRUE	PASS	IID	-3.43531	nonIDM	FAIL
logRTNO	umu	2013	umu:2013	tp1:umu:2013:set2		551	223	3	2.47085	NRCRI	0.986447	0.973114	-0.3		FAIL	FALSE	FAIL	IID	-0.295992	IDM	PASS
logSHTWT	umu	2012	umu:2012	tp1:umu:2012:set1		1383	472	3	2.93008	NRCRI	0.0400669	0.262982	-0.37	TRUE	PASS	TRUE	PASS	IID	-1.48264	ALL	PASS
logSHTWT	kano	2013	kano:2013	tp1:kano:2013:set1		570	223	3	2.55605	NRCRI	0.453035	0.702814	-0.28	TRUE	PASS	FALSE	FAIL	IID	-3.1968	nonIDM	FAIL
logSHTWT	oto	2013	oto:2013	tp1:oto:2013:set1		587	227	3	2.5859	NRCRI	0.0335917	0.95298	-0.26	TRUE	PASS	TRUE	PASS	IID	-15.6764	nonIDM	FAIL
logSHTWT	kano	2014	kano:2014	tp1:kano:2014:set1		144	142	1	1.01408	NRCRI	0.959162	0.421565	-0.33	TRUE	PASS	TRUE	PASS	IDM	-0.378883	ALL	PASS
logSHTWT	umu	2014	umu:2014	tp1:umu:2014:set1		590	230	3	2.56522	NRCRI	0.259072	0.814864	-0.27	TRUE	PASS	FALSE	FAIL	IID	-23.4365	nonIDM	FAIL
logSHTWT	umu	2014	umu:2014	tp2:umu:2014:set4		287	107	3	2.68224	NRCRI	0.000159934	0.795215	-0.29	TRUE	PASS	TRUE	PASS	IID	-1.84924	nonIDM	PASS
logSHTWT	oto	2014	oto:2014	tp1:oto:2014:set1		577	219	3	2.6347	NRCRI	0.80555	0.00134637	-0.61	TRUE	PASS	TRUE	PASS	IDM	-1.9394	PARTITIONED	PASS
logSHTWT	umu	2013	umu:2013	tp1:umu:2013:set1		565	226	3	2.5	NRCRI	0.00262222	0.14167	-0.52	TRUE	PASS	TRUE	PASS	IID	-0.542047	ALL	PASS
logSHTWT	umu	2013	umu:2013	tp2:umu:2013:set4		246	107	3	2.29907	NRCRI	0.00774394	0.971105	-0.3	TRUE	PASS	TRUE	PASS	nonIDM	-0.523662	ALL	PASS
logSHTWT	umu	2013	umu:2013	tp2:umu:2013:set2		322	114	3	2.82456	NRCRI	0.0360422	0.4163	-0.49	TRUE	PASS	TRUE	PASS	ALL	-0.63087	nonIDM	PASS
logSHTWT	umu	2014	umu:2014	tp2:umu:2014:set2		314	112	3	2.80357	NRCRI	0.0892013	0.146673	-0.55	TRUE	PASS	TRUE	PASS	ALL	-1.76803	PARTITIONED	PASS
logSHTWT	kano	2014	kano:2014	tp1:kano:2014:set2		272	184	3	1.47826	NRCRI	0.99609	0.995048	-0.27		FAIL	FALSE	FAIL	IDM	-1.29778e-05	ALL	PASS
logSHTWT	umu	2014	umu:2014	tp1:umu:2014:set2		606	215	3	2.8186	NRCRI	0.0575409	0.889749	-0.23	TRUE	PASS	TRUE	PASS	IID	-6.20152	nonIDM	FAIL
logSHTWT	kano	2013	kano:2013	tp1:kano:2013:set2		540	236	3	2.28814	NRCRI	0.0789676	0.851939	-0.24	TRUE	PASS	TRUE	PASS	nonIDM	-0.182054	ALL	PASS
logSHTWT	oto	2014	oto:2014	tp1:oto:2014:set2		651	237	3	2.74684	NRCRI	0.70352	0.841328	-0.25		FAIL	FALSE	FAIL	IID	-2.20717	nonIDM	FAIL
logSHTWT	umu	2014	umu:2014	tp2:umu:2014:set1		337	116	3	2.90517	NRCRI	0.00806591	0.935959	-0.27	TRUE	PASS	TRUE	PASS	IID	-0.826437	nonIDM	PASS
logSHTWT	umu	2014	umu:2014	tp2:umu:2014:set3		244	97	3	2.51546	NRCRI	0.0684101	0.950427	-0.35	TRUE	PASS	FALSE	FAIL	IID	-3.04368	nonIDM	FAIL
logSHTWT	umu	2013	umu:2013	tp2:umu:2013:set3		286	109	3	2.62385	NRCRI	0.0315648	0.894499	-0.32	TRUE	PASS	TRUE	PASS	nonIDM	-0.555364	ALL	PASS
logSHTWT	umu	2013	umu:2013	tp2:umu:2013:set1		301	114	3	2.64035	NRCRI	0.00398107	0.955768	-0.29	TRUE	PASS	TRUE	PASS	IID	-1.44689	nonIDM	PASS
logSHTWT	oto	2013	oto:2013	tp1:oto:2013:set2		558	233	3	2.39485	NRCRI	0.521048	0.555701	-0.42	TRUE	PASS	TRUE	PASS	ALL	-0.296512	nonIDM	PASS
logSHTWT	umu	2013	umu:2013	tp1:umu:2013:set2		553	223	3	2.47982	NRCRI	0.00810673	0.990234	-0.22	TRUE	PASS	TRUE	PASS	IID	-2.655	nonIDM	FAIL
DM	umu	2012	umu:2012	tp1:umu:2012:set1		1385	472	3	2.93432	NRCRI	0.0277746	0.905654	-0.21	TRUE	PASS	TRUE	PASS	nonIDM	-0.214031	ALL	PASS
DM	kano	2013	kano:2013	tp1:kano:2013:set1		567	224	3	2.53125	NRCRI	0.911579	0.982903	-0.35		FAIL	FALSE	FAIL	IID	-0.044417	ALL	PASS
DM	oto	2013	oto:2013	tp1:oto:2013:set1		481	221	3	2.17647	NRCRI	0.0410204	0.876316	-0.28	TRUE	PASS	TRUE	PASS	nonIDM	-0.612146	ALL	PASS
DM	umu	2014	umu:2014	tp1:umu:2014:set1		589	230	3	2.56087	NRCRI	0.0769794	0.873744	-0.28	TRUE	PASS	TRUE	PASS	nonIDM	-0.558953	ALL	PASS
DM	umu	2014	umu:2014	tp2:umu:2014:set4		280	105	3	2.66667	NRCRI	0.0448389	0.569367	-0.45	TRUE	PASS	TRUE	PASS	ALL	-0.313701	nonIDM	PASS
DM	oto	2014	oto:2014	tp1:oto:2014:set1		568	219	3	2.59361	NRCRI	0.00212699	0.0582288	-0.45	TRUE	PASS	TRUE	PASS	ALL	-1.85736	PARTITIONED	PASS
DM	umu	2013	umu:2013	tp1:umu:2013:set1		572	225	3	2.54222	NRCRI	0.000110202	0.361607	-0.5	TRUE	PASS	TRUE	PASS	ALL	-0.810365	nonIDM	PASS
DM	umu	2013	umu:2013	tp2:umu:2013:set4		241	107	3	2.25234	NRCRI	0.376693	0.828709	-0.64		FAIL	FALSE	FAIL	IDM	-0.725355	ALL	PASS
DM	kano	2014	kano:2014	tp1:kano:2014:set1		69	66	1	1.04545	NRCRI	0.899094	0.257999	-0.43	TRUE	PASS	TRUE	PASS	IDM	-0.149304	IID	PASS
DM	umu	2013	umu:2013	tp2:umu:2013:set2		322	114	3	2.82456	NRCRI	0.282432	0.977412	-0.31		FAIL	FALSE	FAIL	nonIDM	-0.158144	ALL	PASS
DM	kano	2014	kano:2014	tp1:kano:2014:set2		245	173	3	1.41618	NRCRI	0.971166	0.988502	-0.28		FAIL	FALSE	FAIL	ALL	-0.000225205	nonIDM	PASS
DM	umu	2014	umu:2014	tp1:umu:2014:set2		601	216	3	2.78241	NRCRI	0.00141914	0.915952	-0.22	TRUE	PASS	TRUE	PASS	IID	-12.7636	nonIDM	FAIL
DM	kano	2013	kano:2013	tp1:kano:2013:set2		525	234	3	2.24359	NRCRI	0.908501	0.151911	-0.44		FAIL	FALSE	FAIL	IID	-0.103003	IDM	PASS
DM	oto	2014	oto:2014	tp1:oto:2014:set2		632	235	3	2.68936	NRCRI	0.590763	0.0146641	-0.58	TRUE	PASS	TRUE	PASS	IDM	-2.28915	PARTITIONED	PASS
DM	umu	2014	umu:2014	tp2:umu:2014:set1		333	115	3	2.89565	NRCRI	0.0075183	0.349983	-0.42	TRUE	PASS	TRUE	PASS	ALL	-0.873197	nonIDM	PASS
DM	umu	2014	umu:2014	tp2:umu:2014:set3		238	97	3	2.45361	NRCRI	0.0415416	0.929591	-0.34	TRUE	PASS	TRUE	PASS	nonIDM	-0.011875	IID	PASS
DM	umu	2013	umu:2013	tp2:umu:2013:set3		283	110	3	2.57273	NRCRI	0.493793	0.291211	-0.48		FAIL	FALSE	FAIL	IDM	-0.0660461	ALL	PASS
DM	umu	2013	umu:2013	tp2:umu:2013:set1		303	115	3	2.63478	NRCRI	0.115205	0.838718	-0.29		FAIL	FALSE	FAIL	nonIDM	-0.511725	ALL	PASS
DM	oto	2013	oto:2013	tp1:oto:2013:set2		569	236	3	2.41102	NRCRI	0.741406	0.135575	-0.63	TRUE	PASS	TRUE	PASS	IDM	-1.92607	ALL	PASS
DM	umu	2013	umu:2013	tp1:umu:2013:set2		552	224	3	2.46429	NRCRI	0.00904527	0.984355	-0.22	TRUE	PASS	TRUE	PASS	nonIDM	-0.691609	ALL	PASS
HI	umu	2012	umu:2012	tp1:umu:2012:set1		1381	472	3	2.92585	NRCRI	3.12559e-07	0.138173	-0.32	TRUE	PASS	TRUE	PASS	ALL	-1.84566	PARTITIONED	PASS
HI	kano	2013	kano:2013	tp1:kano:2013:set1		567	223	3	2.5426	NRCRI	0.00380598	0.983591	-0.27	TRUE	PASS	TRUE	PASS	nonIDM	-0.822016	ALL	PASS
HI	oto	2013	oto:2013	tp1:oto:2013:set1		569	226	3	2.5177	NRCRI	0.011506	0.895724	-0.27	TRUE	PASS	TRUE	PASS	nonIDM	-1.01615	ALL	PASS
HI	umu	2014	umu:2014	tp1:umu:2014:set1		589	230	3	2.56087	NRCRI	2.86879e-05	0.939218	-0.28	TRUE	PASS	TRUE	PASS	nonIDM	-1.36314	ALL	PASS
HI	umu	2014	umu:2014	tp2:umu:2014:set4		287	107	3	2.68224	NRCRI	4.10302e-05	0.95994	-0.29	TRUE	PASS	TRUE	PASS	IID	-6.86752	nonIDM	FAIL
HI	oto	2014	oto:2014	tp1:oto:2014:set1		569	219	3	2.59817	NRCRI	0.121356	0.167945	-0.46	TRUE	PASS	TRUE	PASS	ALL	-1.67397	nonIDM	PASS
HI	umu	2013	umu:2013	tp1:umu:2013:set1		563	226	3	2.49115	NRCRI	4.47108e-05	0.615962	-0.29	TRUE	PASS	TRUE	PASS	nonIDM	-0.700245	ALL	PASS
HI	umu	2013	umu:2013	tp2:umu:2013:set4		246	107	3	2.29907	NRCRI	0.166362	0.964354	-0.3	TRUE	PASS	TRUE	PASS	nonIDM	-0.177116	ALL	PASS
HI	kano	2014	kano:2014	tp1:kano:2014:set1		141	139	1	1.01439	NRCRI	0.0790827	0.923365	-0.21	TRUE	PASS	TRUE	PASS	nonIDM	-0.63201	ALL	PASS
HI	umu	2013	umu:2013	tp2:umu:2013:set2		322	114	3	2.82456	NRCRI	0.260496	0.0858506	-0.55	TRUE	PASS	TRUE	PASS	IID	-3.53458	ALL	FAIL
HI	umu	2014	umu:2014	tp2:umu:2014:set2		314	112	3	2.80357	NRCRI	0.0109265	0.960468	-0.34	TRUE	PASS	TRUE	PASS	nonIDM	-0.625278	ALL	PASS
HI	kano	2014	kano:2014	tp1:kano:2014:set2		252	178	3	1.41573	NRCRI	0.959843	0.949009	-0.28		FAIL	FALSE	FAIL	IID	-0.153459	ALL	PASS
HI	umu	2014	umu:2014	tp1:umu:2014:set2		606	215	3	2.8186	NRCRI	0.0137111	0.952984	-0.23	TRUE	PASS	TRUE	PASS	IID	-29.0993	nonIDM	FAIL
HI	kano	2013	kano:2013	tp1:kano:2013:set2		540	236	3	2.28814	NRCRI	0.00338187	0.931913	-0.22	TRUE	PASS	TRUE	PASS	nonIDM	-1.20327	ALL	PASS
HI	oto	2014	oto:2014	tp1:oto:2014:set2		646	237	3	2.72574	NRCRI	0.935882	0.885843	-0.31		FAIL	FALSE	FAIL	IDM	-0.0126998	ALL	PASS
HI	umu	2014	umu:2014	tp2:umu:2014:set1		333	115	3	2.89565	NRCRI	0.0012727	0.946779	-0.28	TRUE	PASS	TRUE	PASS	nonIDM	-1.02405	ALL	PASS
HI	umu	2014	umu:2014	tp2:umu:2014:set3		243	97	3	2.50515	NRCRI	0.0385479	0.852528	-0.35	TRUE	PASS	TRUE	PASS	nonIDM	-0.858343	ALL	PASS
HI	umu	2013	umu:2013	tp2:umu:2013:set3		285	109	3	2.61468	NRCRI	0.0266367	0.891504	-0.32	TRUE	PASS	TRUE	PASS	nonIDM	-0.703573	ALL	PASS
HI	umu	2013	umu:2013	tp2:umu:2013:set1		301	114	3	2.64035	NRCRI	0.00287293	0.952506	-0.29	TRUE	PASS	TRUE	PASS	nonIDM	-0.0922745	IID	PASS
HI	oto	2013	oto:2013	tp1:oto:2013:set2		558	233	3	2.39485	NRCRI	0.292365	0.185723	-0.41	TRUE	PASS	FALSE	FAIL	IID	-9.42464	ALL	FAIL
HI	umu	2013	umu:2013	tp1:umu:2013:set2		551	223	3	2.47085	NRCRI	0.000638063	0.826187	-0.22	TRUE	PASS	TRUE	PASS	IID	-23.0308	nonIDM	FAIL
MCMDS	umu	2012	umu:2012	tp1:umu:2012:set1		1391	472	3	2.94703	NRCRI	1.58581e-06	0.986887	-0.19	TRUE	PASS	TRUE	PASS	IID	-4.76739	nonIDM	FAIL
MCMDS	kano	2013	kano:2013	tp1:kano:2013:set1		639	232	3	2.75431	NRCRI	0.0554181	0.843665	-0.28	TRUE	PASS	TRUE	PASS	IID	-0.48955	nonIDM	PASS
MCMDS	oto	2013	oto:2013	tp1:oto:2013:set1		665	234	3	2.84188	NRCRI	1.74274e-06	0.716678	-0.44	TRUE	PASS	TRUE	PASS	IID	-19.234	nonIDM	FAIL
MCMDS	kano	2014	kano:2014	tp1:kano:2014:set1		209	202	1	1.03465	NRCRI	0.0849506	0.873874	-0.21	TRUE	PASS	TRUE	PASS	IID	-0.559196	nonIDM	PASS
MCMDS	umu	2014	umu:2014	tp1:umu:2014:set1		612	231	3	2.64935	NRCRI	0.10284	0.639426	-0.73	TRUE	PASS	TRUE	PASS	IID	-21.1441	nonIDM	FAIL
MCMDS	umu	2014	umu:2014	tp2:umu:2014:set4		298	107	3	2.78505	NRCRI	0.0869365	0.2162	-0.66	TRUE	PASS	TRUE	PASS	IID	-5.79976	ALL	FAIL
MCMDS	oto	2014	oto:2014	tp1:oto:2014:set1		594	220	3	2.7	NRCRI	0.0469697	0.00147943	-0.82	TRUE	PASS	TRUE	PASS	IDM	-5.31715	IID	PASS
MCMDS	umu	2013	umu:2013	tp1:umu:2013:set1		680	234	3	2.90598	NRCRI	1.11616e-07	0.773239	-0.36	TRUE	PASS	TRUE	PASS	IID	-5.46191	nonIDM	FAIL
MCMDS	umu	2013	umu:2013	tp2:umu:2013:set4		318	110	3	2.89091	NRCRI	4.35064e-06	0.306381	-0.41	TRUE	PASS	TRUE	PASS	ALL	-0.524252	nonIDM	PASS
MCMDS	umu	2013	umu:2013	tp2:umu:2013:set2		342	114	3	3	NRCRI	0.402182	0.0847377	-0.83	TRUE	PASS	TRUE	PASS	IID	-4.75861	IDM	FAIL
MCMDS	umu	2014	umu:2014	tp2:umu:2014:set2		332	113	3	2.93805	NRCRI	0.414684	0.959012	-0.35		FAIL	FALSE	FAIL	IID	-1.31201	nonIDM	PASS
MCMDS	kano	2014	kano:2014	tp1:kano:2014:set2		397	217	3	1.82949	NRCRI	7.32318e-05	0.979159	-0.22	TRUE	PASS	TRUE	PASS	IID	-30.5787	nonIDM	FAIL
MCMDS	umu	2014	umu:2014	tp1:umu:2014:set2		640	220	3	2.90909	NRCRI	0.802876	1.49044e-06	-0.86	TRUE	PASS	TRUE	PASS	IID	-51.712	IDM	FAIL
MCMDS	kano	2013	kano:2013	tp1:kano:2013:set2		630	247	3	2.55061	NRCRI	1.61984e-05	0.962642	-0.23	TRUE	PASS	TRUE	PASS	IID	-51.6083	nonIDM	FAIL
MCMDS	oto	2014	oto:2014	tp1:oto:2014:set2		700	237	3	2.95359	NRCRI	0.264229	0.852153	-0.24		FAIL	FALSE	FAIL	IID	-0.0117555	nonIDM	PASS
MCMDS	umu	2014	umu:2014	tp2:umu:2014:set1		345	116	3	2.97414	NRCRI	0.000402401	0.929001	-0.28	TRUE	PASS	TRUE	PASS	IID	-7.947	nonIDM	FAIL
MCMDS	umu	2014	umu:2014	tp2:umu:2014:set3		280	99	3	2.82828	NRCRI	0.0500797	0.915272	-0.36	TRUE	PASS	TRUE	PASS	IID	-4.11622	nonIDM	FAIL
MCMDS	umu	2013	umu:2013	tp2:umu:2013:set3		324	110	3	2.94545	NRCRI	0.0138206	0.964074	-0.34	TRUE	PASS	TRUE	PASS	nonIDM	-0.612329	ALL	PASS
MCMDS	umu	2013	umu:2013	tp2:umu:2013:set1		327	116	3	2.81897	NRCRI	2.82262e-06	0.805425	-0.31	TRUE	PASS	TRUE	PASS	IID	-36.7457	nonIDM	FAIL
MCMDS	oto	2013	oto:2013	tp1:oto:2013:set2		730	250	3	2.92	NRCRI	0.41504	0.19946	-0.42	TRUE	PASS	TRUE	PASS	IDM	-0.0138452	ALL	PASS
MCMDS	umu	2013	umu:2013	tp1:umu:2013:set2		672	237	3	2.83544	NRCRI	0.0516684	1.49399e-10	-0.86	TRUE	PASS	TRUE	PASS	IID	-50.3238	IDM	FAIL
MCBBS	umu	2012	umu:2012	tp1:umu:2012:set1		1392	472	3	2.94915	NRCRI	0.909181	0.919626	-0.26		FAIL	FALSE	FAIL	IID	-0.468297	ALL	PASS
MCBBS	kano	2013	kano:2013	tp1:kano:2013:set1		631	231	3	2.7316	NRCRI	0.711278	0.112998	-0.48		FAIL	FALSE	FAIL	IDM	-0.820537	ALL	PASS
MCBBS	oto	2013	oto:2013	tp1:oto:2013:set1		658	233	3	2.82403	NRCRI	0.0147072	0.00748473	-0.8	TRUE	PASS	TRUE	PASS	IID	-4.54012	IDM	FAIL
MCBBS	umu	2014	umu:2014	tp1:umu:2014:set1		612	231	3	2.64935	NRCRI	0.0676802	0.245943	-0.39	TRUE	PASS	TRUE	PASS	ALL	-1.29578	nonIDM	PASS
MCBBS	umu	2014	umu:2014	tp2:umu:2014:set4		298	107	3	2.78505	NRCRI	0.174152	0.476366	-0.37		FAIL	FALSE	FAIL	IID	-0.00615307	ALL	PASS
MCBBS	oto	2014	oto:2014	tp1:oto:2014:set1		594	220	3	2.7	NRCRI	0.847869	0.341857	-0.43		FAIL	FALSE	FAIL	IDM	-0.10516	IID	PASS
MCBBS	umu	2013	umu:2013	tp1:umu:2013:set1		664	233	3	2.84979	NRCRI	0.00154526	0.867362	-0.26	TRUE	PASS	TRUE	PASS	IID	-2.12841	nonIDM	FAIL
MCBBS	umu	2013	umu:2013	tp2:umu:2013:set4		318	110	3	2.89091	NRCRI	0.599757	0.852017	-0.31		FAIL	FALSE	FAIL	nonIDM	-0.16285	ALL	PASS
MCBBS	umu	2013	umu:2013	tp2:umu:2013:set2		342	114	3	3	NRCRI	0.000149821	0.791741	-0.3	TRUE	PASS	TRUE	PASS	nonIDM	-1.74181	ALL	PASS
MCBBS	umu	2014	umu:2014	tp2:umu:2014:set2		332	113	3	2.93805	NRCRI	0.838652	0.146246	-0.8	TRUE	PASS	TRUE	PASS	IID	-5.40066	nonIDM	FAIL
MCBBS	kano	2014	kano:2014	tp1:kano:2014:set2		397	217	3	1.82949	NRCRI	2.61639e-09	0.964847	-0.25	TRUE	PASS	TRUE	PASS	IID	-39.6975	nonIDM	FAIL
MCBBS	umu	2014	umu:2014	tp1:umu:2014:set2		640	220	3	2.90909	NRCRI	0.93471	0.546763	-0.41	TRUE	PASS	FALSE	FAIL	IID	-11.4689	IDM	FAIL
MCBBS	kano	2013	kano:2013	tp1:kano:2013:set2		615	242	3	2.54132	NRCRI	0.0195052	0.894122	-0.23	TRUE	PASS	TRUE	PASS	nonIDM	-0.281919	ALL	PASS
MCBBS	oto	2014	oto:2014	tp1:oto:2014:set2		705	237	3	2.97468	NRCRI	0.485233	0.0256034	-0.58	TRUE	PASS	TRUE	PASS	IID	-8.0879	IDM	FAIL
MCBBS	umu	2014	umu:2014	tp2:umu:2014:set1		345	116	3	2.97414	NRCRI	0.00311322	0.945265	-0.28	TRUE	PASS	TRUE	PASS	nonIDM	-0.612847	ALL	PASS
MCBBS	umu	2014	umu:2014	tp2:umu:2014:set3		278	99	3	2.80808	NRCRI	0.225366	0.0467365	-0.66	TRUE	PASS	TRUE	PASS	IDM	-0.530128	PARTITIONED	PASS
MCBBS	umu	2013	umu:2013	tp2:umu:2013:set3		324	110	3	2.94545	NRCRI	0.00281409	0.884113	-0.34	TRUE	PASS	TRUE	PASS	nonIDM	-0.291856	ALL	PASS
MCBBS	umu	2013	umu:2013	tp2:umu:2013:set1		327	116	3	2.81897	NRCRI	0.597427	0.147242	-0.7	TRUE	PASS	TRUE	PASS	IID	-4.90085	IDM	FAIL
MCBBS	oto	2013	oto:2013	tp1:oto:2013:set2		731	250	3	2.924	NRCRI	0.750234	0.368246	-0.35		FAIL	FALSE	FAIL	IID	-1.11525	IDM	PASS
MCBBS	umu	2013	umu:2013	tp1:umu:2013:set2		669	237	3	2.82278	NRCRI	0.0165838	0.892131	-0.21	TRUE	PASS	TRUE	PASS	IID	-32.3697	nonIDM	FAIL
CBSDRS	KASESE	2013	KASESE:2013	KASESE:2013		452	288	2	1.56944	NaCRRI	0.000701014	0.235703	-0.37	TRUE	PASS	TRUE	PASS	ALL	-1.37833	nonIDM	PASS
CBSDRS	NGETTA	2013	NGETTA:2013	NGETTA:2013		488	311	2	1.56913	NaCRRI	4.00187e-12	0.221606	-0.34	TRUE	PASS	TRUE	PASS	ALL	-0.452879	nonIDM	PASS
CBSDRS	NAMULONGE	2014	NAMULONGE:2014	NAMULONGE:2014		592	300	2	1.97333	NaCRRI	3.96756e-05	0.0239598	-0.48	TRUE	PASS	TRUE	PASS	ALL	-1.77152	PARTITIONED	PASS
CBSDRS	NAMULONGE	2013	NAMULONGE:2013	NAMULONGE:2013		713	392	2	1.81888	NaCRRI	1.71759e-08	0.042862	-0.4	TRUE	PASS	TRUE	PASS	ALL	-1.97972	PARTITIONED	PASS
CBSDRS	NAMULONGE	2012	NAMULONGE:2012	NAMULONGE:2012		276	276	1	1	NaCRRI	0.000910394	0.986396	-0.19	TRUE	PASS	TRUE	PASS	nonIDM	-0.747709	ALL	PASS
MCMDS	KASESE	2013	KASESE:2013	KASESE:2013		520	308	2	1.68831	NaCRRI	0.000147082	0.645372	-0.26	TRUE	PASS	TRUE	PASS	nonIDM	-1.19188	ALL	PASS
MCMDS	NGETTA	2013	NGETTA:2013	NGETTA:2013		578	341	2	1.69501	NaCRRI	9.15782e-09	0.79328	-0.27	TRUE	PASS	TRUE	PASS	nonIDM	-1.93133	PARTITIONED	PASS
MCMDS	NAMULONGE	2014	NAMULONGE:2014	NAMULONGE:2014		713	327	2	2.18043	NaCRRI	2.06899e-07	0.875119	-0.27	TRUE	PASS	TRUE	PASS	nonIDM	-2.0247	PARTITIONED	PASS
MCMDS	NAMULONGE	2013	NAMULONGE:2013	NAMULONGE:2013		780	408	2	1.91176	NaCRRI	2.12675e-10	0.901965	-0.23	TRUE	PASS	TRUE	PASS	nonIDM	-2.01517	PARTITIONED	PASS
MCMDS	NAMULONGE	2012	NAMULONGE:2012	NAMULONGE:2012		288	288	1	1	NaCRRI	0.00280975	0.787162	-0.18	TRUE	PASS	TRUE	PASS	nonIDM	-0.506079	ALL	PASS
MCBSDS	KASESE	2013	KASESE:2013	KASESE:2013		520	308	2	1.68831	NaCRRI	0.051479	0.0172954	-0.54	TRUE	PASS	TRUE	PASS	ALL	-0.837632	PARTITIONED	PASS
MCBSDS	NGETTA	2013	NGETTA:2013	NGETTA:2013		583	343	2	1.69971	NaCRRI	0.000602757	0.00323586	-0.67	TRUE	PASS	TRUE	PASS	PARTITIONED	-0.791192	ALL	PASS
MCBSDS	NAMULONGE	2014	NAMULONGE:2014	NAMULONGE:2014		710	326	2	2.17791	NaCRRI	0.0241113	0.00738698	-0.62	TRUE	PASS	TRUE	PASS	ALL	-0.681326	PARTITIONED	PASS
MCBSDS	NAMULONGE	2013	NAMULONGE:2013	NAMULONGE:2013		780	408	2	1.91176	NaCRRI	4.26663e-05	0.128424	-0.34	TRUE	PASS	TRUE	PASS	ALL	-1.98296	PARTITIONED	PASS
MCBSDS	NAMULONGE	2012	NAMULONGE:2012	NAMULONGE:2012		288	288	1	1	NaCRRI	1.14763e-06	0.0200722	-0.28	TRUE	PASS	TRUE	PASS	ALL	-1.99433	PARTITIONED	PASS
logRTWT	KASESE	2013	KASESE:2013	KASESE:2013		434	282	2	1.53901	NaCRRI	0.000225625	0.608635	-0.26	TRUE	PASS	TRUE	PASS	nonIDM	-0.143163	ALL	PASS
logRTWT	NAMULONGE	2013	NAMULONGE:2013	NAMULONGE:2013		711	388	2	1.83247	NaCRRI	0.000468349	0.204703	-0.38	TRUE	PASS	TRUE	PASS	ALL	-1.60899	nonIDM	PASS
logRTWT	NAMULONGE	2012	NAMULONGE:2012	NAMULONGE:2012		277	277	1	1	NaCRRI	0.000881417	0.421958	-0.22	TRUE	PASS	TRUE	PASS	ALL	-0.559385	nonIDM	PASS
logRTWT	NGETTA	2013	NGETTA:2013	NGETTA:2013		441	290	2	1.52069	NaCRRI	0.000157463	0.0344089	-0.42	TRUE	PASS	TRUE	PASS	ALL	-1.9143	PARTITIONED	PASS
logRTNO	KASESE	2013	KASESE:2013	KASESE:2013		435	281	2	1.54804	NaCRRI	0.00320591	0.101353	-0.38	TRUE	PASS	TRUE	PASS	ALL	-1.90039	PARTITIONED	PASS
logRTNO	NAMULONGE	2013	NAMULONGE:2013	NAMULONGE:2013		705	389	2	1.81234	NaCRRI	0.00429293	0.0726209	-0.47	TRUE	PASS	TRUE	PASS	ALL	-1.86179	PARTITIONED	PASS
logRTNO	NAMULONGE	2012	NAMULONGE:2012	NAMULONGE:2012		279	279	1	1	NaCRRI	0.0197007	0.599113	-0.22	TRUE	PASS	TRUE	PASS	ALL	-0.197125	nonIDM	PASS
logRTNO	NGETTA	2013	NGETTA:2013	NGETTA:2013		439	291	2	1.50859	NaCRRI	0.0144971	0.0390755	-0.4	TRUE	PASS	TRUE	PASS	ALL	-1.71276	PARTITIONED	PASS

## Sheet: TableS07
SNP	Chr	Pos	RandomSample1	RandomSample2	RandomSample3
S1_26576	1	26576	nonIDM	nonIDM	nonIDM
S1_75465	1	75465	nonIDM	nonIDM	nonIDM
S1_75629	1	75629	nonIDM	nonIDM	nonIDM
S1_84637	1	84637	nonIDM	nonIDM	nonIDM
S1_84843	1	84843	nonIDM	nonIDM	IDM
S1_126289	1	126289	nonIDM	nonIDM	IDM
S1_126406	1	126406	nonIDM	nonIDM	nonIDM
S1_126442	1	126442	nonIDM	nonIDM	nonIDM
S1_126511	1	126511	IDM	nonIDM	nonIDM
S1_145739	1	145739	IDM	nonIDM	IDM
S1_145889	1	145889	nonIDM	nonIDM	nonIDM
S1_252326	1	252326	nonIDM	nonIDM	nonIDM
S1_252382	1	252382	nonIDM	nonIDM	nonIDM
S1_254148	1	254148	nonIDM	nonIDM	nonIDM
S1_260691	1	260691	nonIDM	nonIDM	nonIDM
S1_260701	1	260701	nonIDM	IDM	nonIDM
S1_260716	1	260716	nonIDM	nonIDM	nonIDM
S1_260815	1	260815	nonIDM	nonIDM	nonIDM
S1_292227	1	292227	nonIDM	nonIDM	nonIDM
S1_294221	1	294221	nonIDM	nonIDM	nonIDM
S1_294550	1	294550	nonIDM	nonIDM	nonIDM
S1_307966	1	307966	nonIDM	nonIDM	nonIDM
S1_311450	1	311450	nonIDM	nonIDM	nonIDM
S1_346031	1	346031	nonIDM	nonIDM	nonIDM
S1_346219	1	346219	nonIDM	nonIDM	nonIDM
S1_346224	1	346224	nonIDM	nonIDM	nonIDM
S1_354840	1	354840	nonIDM	nonIDM	nonIDM
S1_356953	1	356953	nonIDM	nonIDM	IDM
S1_572133	1	572133	nonIDM	nonIDM	nonIDM
S1_581139	1	581139	nonIDM	IDM	nonIDM
S1_582761	1	582761	nonIDM	nonIDM	nonIDM
S1_582943	1	582943	nonIDM	nonIDM	IDM
S1_583366	1	583366	nonIDM	nonIDM	nonIDM
S1_632382	1	632382	nonIDM	IDM	nonIDM
S1_633894	1	633894	nonIDM	nonIDM	nonIDM
S1_635988	1	635988	nonIDM	nonIDM	nonIDM
S1_636002	1	636002	nonIDM	nonIDM	nonIDM
S1_639631	1	639631	nonIDM	nonIDM	nonIDM
S1_647734	1	647734	nonIDM	IDM	nonIDM
S1_647747	1	647747	nonIDM	IDM	nonIDM
S1_647760	1	647760	nonIDM	nonIDM	nonIDM
S1_652613	1	652613	nonIDM	nonIDM	nonIDM
S1_652699	1	652699	nonIDM	nonIDM	nonIDM
S1_695262	1	695262	nonIDM	nonIDM	nonIDM
S1_697904	1	697904	nonIDM	nonIDM	nonIDM
S1_719628	1	719628	nonIDM	IDM	nonIDM
S1_719688	1	719688	nonIDM	nonIDM	nonIDM
S1_719722	1	719722	nonIDM	nonIDM	nonIDM
S1_793289	1	793289	nonIDM	nonIDM	nonIDM
S1_793325	1	793325	nonIDM	nonIDM	nonIDM
S1_793335	1	793335	nonIDM	nonIDM	IDM
S1_793343	1	793343	nonIDM	nonIDM	nonIDM
S1_793415	1	793415	IDM	nonIDM	nonIDM
S1_793451	1	793451	nonIDM	nonIDM	nonIDM
S1_793742	1	793742	IDM	IDM	nonIDM
S1_793775	1	793775	nonIDM	nonIDM	nonIDM
S1_793787	1	793787	nonIDM	nonIDM	nonIDM
S1_794146	1	794146	nonIDM	nonIDM	nonIDM
S1_805990	1	805990	nonIDM	IDM	nonIDM
S1_811711	1	811711	nonIDM	nonIDM	nonIDM
S1_811750	1	811750	IDM	nonIDM	nonIDM
S1_811756	1	811756	nonIDM	nonIDM	nonIDM
S1_816743	1	816743	nonIDM	nonIDM	nonIDM
S1_829890	1	829890	nonIDM	IDM	nonIDM
S1_830449	1	830449	nonIDM	IDM	nonIDM
S1_832434	1	832434	nonIDM	nonIDM	nonIDM
S1_832443	1	832443	nonIDM	nonIDM	nonIDM
S1_832786	1	832786	nonIDM	nonIDM	nonIDM
S1_847206	1	847206	nonIDM	nonIDM	IDM
S1_847822	1	847822	nonIDM	nonIDM	nonIDM
S1_868929	1	868929	nonIDM	nonIDM	nonIDM
S1_868970	1	868970	nonIDM	IDM	nonIDM
S1_876586	1	876586	nonIDM	nonIDM	nonIDM
S1_876608	1	876608	nonIDM	nonIDM	nonIDM
S1_876617	1	876617	nonIDM	IDM	nonIDM
S1_880050	1	880050	nonIDM	nonIDM	nonIDM
S1_881840	1	881840	nonIDM	nonIDM	nonIDM
S1_885211	1	885211	IDM	nonIDM	nonIDM
S1_885234	1	885234	IDM	nonIDM	nonIDM
S1_885619	1	885619	nonIDM	nonIDM	nonIDM
S1_885944	1	885944	nonIDM	nonIDM	nonIDM
S1_885961	1	885961	nonIDM	IDM	nonIDM
S1_885971	1	885971	nonIDM	nonIDM	nonIDM
S1_885995	1	885995	nonIDM	nonIDM	nonIDM
S1_947465	1	947465	nonIDM	nonIDM	nonIDM
S1_964392	1	964392	nonIDM	nonIDM	nonIDM
S1_964546	1	964546	nonIDM	nonIDM	IDM
S1_964594	1	964594	nonIDM	IDM	nonIDM
S1_970056	1	970056	IDM	nonIDM	nonIDM
S1_1075541	1	1075541	nonIDM	nonIDM	nonIDM
S1_1077841	1	1077841	IDM	nonIDM	nonIDM
S1_1077846	1	1077846	nonIDM	nonIDM	nonIDM
S1_1078141	1	1078141	nonIDM	nonIDM	nonIDM
S1_1084450	1	1084450	nonIDM	nonIDM	nonIDM
S1_1084456	1	1084456	nonIDM	nonIDM	nonIDM
S1_1132830	1	1132830	nonIDM	nonIDM	IDM
S1_1135600	1	1135600	nonIDM	nonIDM	nonIDM
S1_1135712	1	1135712	nonIDM	nonIDM	nonIDM
S1_1135728	1	1135728	nonIDM	nonIDM	IDM
S1_1136022	1	1136022	nonIDM	nonIDM	IDM
S1_1152126	1	1152126	IDM	nonIDM	nonIDM
S1_1152160	1	1152160	nonIDM	nonIDM	nonIDM
S1_1152190	1	1152190	nonIDM	nonIDM	nonIDM
S1_1152201	1	1152201	nonIDM	nonIDM	nonIDM
S1_1154974	1	1154974	nonIDM	nonIDM	nonIDM
S1_1155000	1	1155000	IDM	nonIDM	nonIDM
S1_1155112	1	1155112	IDM	nonIDM	nonIDM
S1_1155117	1	1155117	nonIDM	nonIDM	nonIDM
S1_1155148	1	1155148	nonIDM	nonIDM	nonIDM
S1_1155187	1	1155187	nonIDM	IDM	nonIDM
S1_1174219	1	1174219	nonIDM	nonIDM	nonIDM
S1_1210849	1	1210849	IDM	nonIDM	nonIDM
S1_1210902	1	1210902	IDM	nonIDM	nonIDM
S1_1211525	1	1211525	nonIDM	nonIDM	nonIDM
S1_1214719	1	1214719	nonIDM	nonIDM	IDM
S1_1216563	1	1216563	nonIDM	nonIDM	nonIDM
S1_1220950	1	1220950	nonIDM	nonIDM	nonIDM
S1_1262935	1	1262935	nonIDM	nonIDM	IDM
S1_1291241	1	1291241	nonIDM	nonIDM	nonIDM
S1_1292835	1	1292835	nonIDM	nonIDM	nonIDM
S1_1293303	1	1293303	nonIDM	IDM	nonIDM
S1_1310706	1	1310706	nonIDM	nonIDM	IDM
S1_1313587	1	1313587	nonIDM	nonIDM	nonIDM
S1_1314066	1	1314066	IDM	nonIDM	nonIDM
S1_1314094	1	1314094	nonIDM	nonIDM	IDM
S1_1314373	1	1314373	IDM	nonIDM	nonIDM
S1_1343882	1	1343882	IDM	nonIDM	nonIDM
S1_1343892	1	1343892	nonIDM	nonIDM	IDM
S1_1361434	1	1361434	nonIDM	nonIDM	nonIDM
S1_1361475	1	1361475	IDM	nonIDM	nonIDM
S1_1361524	1	1361524	nonIDM	nonIDM	nonIDM
S1_1367954	1	1367954	nonIDM	nonIDM	IDM
S1_1374141	1	1374141	nonIDM	nonIDM	IDM
S1_1374420	1	1374420	nonIDM	nonIDM	IDM
S1_1374438	1	1374438	nonIDM	nonIDM	nonIDM
S1_1376070	1	1376070	nonIDM	nonIDM	IDM
S1_1381958	1	1381958	IDM	nonIDM	nonIDM
S1_1381966	1	1381966	nonIDM	nonIDM	nonIDM
S1_1381983	1	1381983	nonIDM	nonIDM	IDM
S1_1411716	1	1411716	IDM	nonIDM	IDM
S1_1419661	1	1419661	nonIDM	nonIDM	nonIDM
S1_1421085	1	1421085	nonIDM	nonIDM	nonIDM
S1_1427092	1	1427092	nonIDM	nonIDM	nonIDM
S1_1427518	1	1427518	nonIDM	nonIDM	nonIDM
S1_1427538	1	1427538	nonIDM	nonIDM	nonIDM
S1_1430540	1	1430540	nonIDM	nonIDM	IDM
S1_1437922	1	1437922	nonIDM	nonIDM	nonIDM
S1_1437961	1	1437961	nonIDM	nonIDM	nonIDM
S1_1438142	1	1438142	nonIDM	nonIDM	nonIDM
S1_1438155	1	1438155	nonIDM	nonIDM	nonIDM
S1_1438161	1	1438161	IDM	nonIDM	IDM
S1_1438203	1	1438203	nonIDM	nonIDM	nonIDM
S1_1454085	1	1454085	nonIDM	nonIDM	nonIDM
S1_1454229	1	1454229	nonIDM	nonIDM	nonIDM
S1_1454465	1	1454465	nonIDM	nonIDM	IDM
S1_1538986	1	1538986	nonIDM	nonIDM	nonIDM
S1_1539000	1	1539000	nonIDM	nonIDM	nonIDM
S1_1556776	1	1556776	IDM	IDM	nonIDM
S1_1561683	1	1561683	nonIDM	nonIDM	nonIDM
S1_1561773	1	1561773	nonIDM	IDM	nonIDM
S1_1566091	1	1566091	nonIDM	nonIDM	nonIDM
S1_1566101	1	1566101	nonIDM	nonIDM	nonIDM
S1_1576656	1	1576656	nonIDM	nonIDM	nonIDM
S1_1576663	1	1576663	nonIDM	IDM	nonIDM
S1_1576672	1	1576672	nonIDM	nonIDM	nonIDM
S1_1576678	1	1576678	nonIDM	nonIDM	nonIDM
S1_1576710	1	1576710	nonIDM	nonIDM	nonIDM
S1_1576996	1	1576996	nonIDM	nonIDM	nonIDM
S1_1577002	1	1577002	nonIDM	nonIDM	nonIDM
S1_1577025	1	1577025	nonIDM	nonIDM	nonIDM
S1_1583036	1	1583036	IDM	IDM	nonIDM
S1_1583247	1	1583247	nonIDM	nonIDM	nonIDM
S1_1583263	1	1583263	IDM	nonIDM	nonIDM
S1_1584915	1	1584915	nonIDM	nonIDM	IDM
S1_1584942	1	1584942	nonIDM	nonIDM	nonIDM
S1_1585093	1	1585093	nonIDM	nonIDM	nonIDM
S1_1585100	1	1585100	nonIDM	nonIDM	nonIDM
S1_1585120	1	1585120	nonIDM	nonIDM	nonIDM
S1_1585147	1	1585147	nonIDM	nonIDM	nonIDM
S1_1585775	1	1585775	nonIDM	nonIDM	IDM
S1_1585782	1	1585782	nonIDM	nonIDM	nonIDM
S1_1585794	1	1585794	IDM	nonIDM	nonIDM
S1_1585827	1	1585827	nonIDM	nonIDM	nonIDM
S1_1585840	1	1585840	IDM	nonIDM	nonIDM
S1_1585851	1	1585851	nonIDM	nonIDM	nonIDM
S1_1585867	1	1585867	nonIDM	nonIDM	nonIDM
S1_1586833	1	1586833	nonIDM	nonIDM	nonIDM
S1_1586839	1	1586839	nonIDM	nonIDM	nonIDM
S1_1586863	1	1586863	IDM	nonIDM	nonIDM
S1_1588728	1	1588728	nonIDM	nonIDM	nonIDM
S1_1589412	1	1589412	nonIDM	nonIDM	nonIDM
S1_1589423	1	1589423	nonIDM	IDM	nonIDM
S1_1589434	1	1589434	nonIDM	nonIDM	nonIDM
S1_1589494	1	1589494	nonIDM	IDM	nonIDM
S1_1589597	1	1589597	nonIDM	nonIDM	IDM
S1_1589652	1	1589652	IDM	nonIDM	IDM
S1_1590008	1	1590008	nonIDM	IDM	IDM
S1_1590037	1	1590037	nonIDM	nonIDM	nonIDM
S1_1590069	1	1590069	IDM	IDM	nonIDM
S1_1615831	1	1615831	IDM	nonIDM	nonIDM
S1_1615914	1	1615914	nonIDM	nonIDM	nonIDM
S1_1616652	1	1616652	nonIDM	nonIDM	nonIDM
S1_1617596	1	1617596	nonIDM	nonIDM	nonIDM
S1_1617693	1	1617693	nonIDM	nonIDM	nonIDM
S1_1623128	1	1623128	nonIDM	nonIDM	nonIDM
S1_1623174	1	1623174	nonIDM	nonIDM	nonIDM
S1_1646082	1	1646082	IDM	nonIDM	nonIDM
S1_1646727	1	1646727	nonIDM	nonIDM	IDM
S1_1646754	1	1646754	nonIDM	IDM	nonIDM
S1_1648969	1	1648969	nonIDM	nonIDM	nonIDM
S1_1653403	1	1653403	nonIDM	nonIDM	nonIDM
S1_1653449	1	1653449	nonIDM	nonIDM	nonIDM
S1_1709772	1	1709772	nonIDM	nonIDM	nonIDM
S1_1709927	1	1709927	IDM	nonIDM	nonIDM
S1_1709934	1	1709934	nonIDM	nonIDM	nonIDM
S1_1709948	1	1709948	nonIDM	nonIDM	nonIDM
S1_1709964	1	1709964	nonIDM	nonIDM	nonIDM
S1_1710835	1	1710835	nonIDM	IDM	nonIDM
S1_1710938	1	1710938	IDM	nonIDM	nonIDM
S1_1725912	1	1725912	nonIDM	nonIDM	nonIDM
S1_1725996	1	1725996	IDM	nonIDM	nonIDM
S1_1726035	1	1726035	nonIDM	nonIDM	nonIDM
S1_1764419	1	1764419	nonIDM	IDM	IDM
S1_1764542	1	1764542	nonIDM	nonIDM	nonIDM
S1_1764584	1	1764584	nonIDM	nonIDM	nonIDM
S1_1764757	1	1764757	IDM	nonIDM	nonIDM
S1_1765222	1	1765222	nonIDM	nonIDM	nonIDM
S1_1765256	1	1765256	nonIDM	nonIDM	nonIDM
S1_1765328	1	1765328	nonIDM	nonIDM	nonIDM
S1_1808116	1	1808116	nonIDM	nonIDM	nonIDM
S1_1974849	1	1974849	nonIDM	nonIDM	nonIDM
S1_1975092	1	1975092	nonIDM	nonIDM	nonIDM
S1_1976249	1	1976249	IDM	IDM	nonIDM
S1_1976258	1	1976258	nonIDM	nonIDM	nonIDM
S1_1990070	1	1990070	IDM	nonIDM	nonIDM
S1_1996103	1	1996103	nonIDM	nonIDM	nonIDM
S1_1996234	1	1996234	nonIDM	nonIDM	nonIDM
S1_1996243	1	1996243	nonIDM	nonIDM	nonIDM
S1_1996258	1	1996258	IDM	nonIDM	nonIDM
S1_2022817	1	2022817	nonIDM	nonIDM	nonIDM
S1_2022859	1	2022859	nonIDM	nonIDM	IDM
S1_2022932	1	2022932	nonIDM	nonIDM	nonIDM
S1_2022966	1	2022966	IDM	nonIDM	IDM
S1_2051192	1	2051192	nonIDM	nonIDM	IDM
S1_2051274	1	2051274	nonIDM	nonIDM	nonIDM
S1_2051661	1	2051661	IDM	nonIDM	IDM
S1_2073351	1	2073351	nonIDM	nonIDM	nonIDM
S1_2073379	1	2073379	nonIDM	nonIDM	nonIDM
S1_2073510	1	2073510	nonIDM	nonIDM	nonIDM
S1_2095232	1	2095232	nonIDM	nonIDM	IDM
S1_2095570	1	2095570	nonIDM	nonIDM	nonIDM
S1_2095579	1	2095579	nonIDM	nonIDM	nonIDM
S1_2103812	1	2103812	IDM	IDM	IDM
S1_2104036	1	2104036	nonIDM	nonIDM	nonIDM
S1_2104050	1	2104050	nonIDM	nonIDM	nonIDM
S1_2104061	1	2104061	nonIDM	nonIDM	nonIDM
S1_2142358	1	2142358	IDM	nonIDM	nonIDM
S1_2142379	1	2142379	IDM	IDM	nonIDM
S1_2147232	1	2147232	nonIDM	nonIDM	nonIDM
S1_2147700	1	2147700	nonIDM	nonIDM	nonIDM
S1_2147889	1	2147889	nonIDM	nonIDM	nonIDM
S1_2147894	1	2147894	nonIDM	IDM	nonIDM
S1_2150891	1	2150891	nonIDM	nonIDM	nonIDM
S1_2155483	1	2155483	nonIDM	nonIDM	nonIDM
S1_2164798	1	2164798	nonIDM	nonIDM	nonIDM
S1_2179164	1	2179164	nonIDM	nonIDM	nonIDM
S1_2179198	1	2179198	nonIDM	nonIDM	nonIDM
S1_2185432	1	2185432	nonIDM	nonIDM	nonIDM
S1_2197849	1	2197849	nonIDM	nonIDM	IDM
S1_2198022	1	2198022	nonIDM	nonIDM	nonIDM
S1_2198062	1	2198062	nonIDM	nonIDM	nonIDM
S1_2198081	1	2198081	nonIDM	nonIDM	IDM
S1_2198088	1	2198088	nonIDM	nonIDM	nonIDM
S1_2198095	1	2198095	nonIDM	nonIDM	nonIDM
S1_2198129	1	2198129	nonIDM	nonIDM	IDM
S1_2198138	1	2198138	nonIDM	nonIDM	nonIDM
S1_2198148	1	2198148	nonIDM	nonIDM	nonIDM
S1_2198202	1	2198202	nonIDM	nonIDM	nonIDM
S1_2198237	1	2198237	nonIDM	nonIDM	nonIDM
S1_2198283	1	2198283	nonIDM	nonIDM	nonIDM
S1_2198291	1	2198291	nonIDM	nonIDM	nonIDM
S1_2208776	1	2208776	nonIDM	nonIDM	nonIDM
S1_2211946	1	2211946	nonIDM	IDM	nonIDM
S1_2215080	1	2215080	nonIDM	nonIDM	nonIDM
S1_2215105	1	2215105	nonIDM	IDM	nonIDM
S1_2215123	1	2215123	nonIDM	nonIDM	nonIDM
S1_2215376	1	2215376	IDM	IDM	nonIDM
S1_2215449	1	2215449	nonIDM	nonIDM	nonIDM
S1_2215483	1	2215483	nonIDM	nonIDM	nonIDM
S1_2217275	1	2217275	nonIDM	nonIDM	nonIDM
S1_2220167	1	2220167	nonIDM	nonIDM	nonIDM
S1_2220189	1	2220189	nonIDM	nonIDM	nonIDM
S1_2220237	1	2220237	nonIDM	IDM	nonIDM
S1_2223141	1	2223141	nonIDM	IDM	nonIDM
S1_2227407	1	2227407	nonIDM	nonIDM	nonIDM
S1_2227497	1	2227497	nonIDM	nonIDM	nonIDM
S1_2227826	1	2227826	nonIDM	nonIDM	nonIDM
S1_2227858	1	2227858	nonIDM	nonIDM	IDM
S1_2227898	1	2227898	nonIDM	nonIDM	nonIDM
S1_2228074	1	2228074	nonIDM	nonIDM	nonIDM
S1_2228111	1	2228111	nonIDM	IDM	nonIDM
S1_2228142	1	2228142	nonIDM	nonIDM	nonIDM
S1_2230764	1	2230764	IDM	nonIDM	nonIDM
S1_2234457	1	2234457	nonIDM	nonIDM	nonIDM
S1_2237583	1	2237583	nonIDM	nonIDM	nonIDM
S1_2250748	1	2250748	nonIDM	nonIDM	nonIDM
S1_2250883	1	2250883	nonIDM	nonIDM	nonIDM
S1_2281969	1	2281969	nonIDM	IDM	nonIDM
S1_2282061	1	2282061	nonIDM	nonIDM	nonIDM
S1_2282113	1	2282113	nonIDM	nonIDM	nonIDM
S1_2282126	1	2282126	nonIDM	nonIDM	nonIDM
S1_2282143	1	2282143	IDM	nonIDM	IDM
S1_2282281	1	2282281	nonIDM	nonIDM	nonIDM
S1_2282651	1	2282651	IDM	nonIDM	nonIDM
S1_2282698	1	2282698	nonIDM	nonIDM	nonIDM
S1_2365691	1	2365691	IDM	nonIDM	nonIDM
S1_2365716	1	2365716	nonIDM	nonIDM	nonIDM
S1_2365727	1	2365727	nonIDM	nonIDM	nonIDM
S1_2365947	1	2365947	nonIDM	nonIDM	nonIDM
S1_2386692	1	2386692	nonIDM	nonIDM	IDM
S1_2386742	1	2386742	nonIDM	nonIDM	nonIDM
S1_2386777	1	2386777	nonIDM	nonIDM	nonIDM
S1_2386783	1	2386783	nonIDM	nonIDM	nonIDM
S1_2391459	1	2391459	nonIDM	nonIDM	nonIDM
S1_2391483	1	2391483	nonIDM	nonIDM	nonIDM
S1_2391503	1	2391503	nonIDM	nonIDM	nonIDM
S1_2436296	1	2436296	nonIDM	nonIDM	nonIDM
S1_2459407	1	2459407	IDM	nonIDM	IDM
S1_2462459	1	2462459	nonIDM	IDM	IDM
S1_2462513	1	2462513	nonIDM	nonIDM	nonIDM
S1_2462660	1	2462660	nonIDM	nonIDM	nonIDM
S1_2483181	1	2483181	nonIDM	nonIDM	nonIDM
S1_2483412	1	2483412	IDM	nonIDM	nonIDM
S1_2483473	1	2483473	nonIDM	nonIDM	nonIDM
S1_2489839	1	2489839	nonIDM	nonIDM	nonIDM
S1_2490180	1	2490180	nonIDM	IDM	nonIDM
S1_2490221	1	2490221	IDM	nonIDM	nonIDM
S1_2490392	1	2490392	IDM	IDM	nonIDM
S1_2490406	1	2490406	nonIDM	IDM	nonIDM
S1_2490431	1	2490431	nonIDM	nonIDM	nonIDM
S1_2490438	1	2490438	nonIDM	IDM	nonIDM
S1_2490450	1	2490450	nonIDM	nonIDM	nonIDM
S1_2490474	1	2490474	nonIDM	nonIDM	nonIDM
S1_2490508	1	2490508	nonIDM	nonIDM	nonIDM
S1_2490577	1	2490577	nonIDM	nonIDM	IDM
S1_2490668	1	2490668	IDM	nonIDM	nonIDM
S1_2490681	1	2490681	nonIDM	nonIDM	nonIDM
S1_2501166	1	2501166	IDM	nonIDM	nonIDM
S1_2501179	1	2501179	nonIDM	nonIDM	IDM
S1_2502011	1	2502011	nonIDM	nonIDM	nonIDM
S1_2502017	1	2502017	IDM	nonIDM	nonIDM
S1_2502219	1	2502219	IDM	IDM	nonIDM
S1_2502227	1	2502227	nonIDM	nonIDM	nonIDM
S1_2582299	1	2582299	nonIDM	nonIDM	nonIDM
S1_2595139	1	2595139	nonIDM	nonIDM	IDM
S1_2602697	1	2602697	nonIDM	nonIDM	nonIDM
S1_2602733	1	2602733	nonIDM	nonIDM	nonIDM
S1_2602741	1	2602741	nonIDM	nonIDM	nonIDM
S1_2605261	1	2605261	nonIDM	IDM	nonIDM
S1_2620616	1	2620616	nonIDM	nonIDM	nonIDM
S1_2620628	1	2620628	nonIDM	nonIDM	nonIDM
S1_2620710	1	2620710	nonIDM	nonIDM	IDM
S1_2620726	1	2620726	nonIDM	nonIDM	nonIDM
S1_2620771	1	2620771	nonIDM	nonIDM	nonIDM
S1_2628090	1	2628090	IDM	IDM	nonIDM
S1_2630749	1	2630749	nonIDM	nonIDM	nonIDM
S1_2630761	1	2630761	nonIDM	nonIDM	nonIDM
S1_2630770	1	2630770	nonIDM	nonIDM	nonIDM
S1_2643261	1	2643261	nonIDM	nonIDM	nonIDM
S1_2643309	1	2643309	nonIDM	nonIDM	nonIDM
S1_2650773	1	2650773	nonIDM	nonIDM	IDM
S1_2650809	1	2650809	IDM	nonIDM	nonIDM
S1_2650821	1	2650821	nonIDM	nonIDM	IDM
S1_2655159	1	2655159	nonIDM	nonIDM	IDM
S1_2655164	1	2655164	nonIDM	nonIDM	nonIDM
S1_2655174	1	2655174	nonIDM	nonIDM	nonIDM
S1_2655180	1	2655180	nonIDM	nonIDM	IDM
S1_2660544	1	2660544	nonIDM	nonIDM	nonIDM
S1_2667350	1	2667350	nonIDM	nonIDM	nonIDM
S1_2667416	1	2667416	nonIDM	nonIDM	nonIDM
S1_2667430	1	2667430	nonIDM	nonIDM	nonIDM
S1_2671913	1	2671913	IDM	nonIDM	IDM
S1_2671918	1	2671918	nonIDM	nonIDM	nonIDM
S1_2671927	1	2671927	nonIDM	IDM	nonIDM
S1_2675446	1	2675446	IDM	nonIDM	IDM
S1_2700314	1	2700314	nonIDM	nonIDM	IDM
S1_2700329	1	2700329	nonIDM	nonIDM	nonIDM
S1_2700342	1	2700342	nonIDM	nonIDM	nonIDM
S1_2701316	1	2701316	nonIDM	nonIDM	nonIDM
S1_2701369	1	2701369	nonIDM	IDM	nonIDM
S1_2701379	1	2701379	nonIDM	IDM	nonIDM
S1_2701395	1	2701395	nonIDM	nonIDM	nonIDM
S1_2703220	1	2703220	nonIDM	nonIDM	nonIDM
S1_2703277	1	2703277	IDM	nonIDM	nonIDM
S1_2703304	1	2703304	IDM	IDM	nonIDM
S1_2703309	1	2703309	nonIDM	nonIDM	nonIDM
S1_2705585	1	2705585	nonIDM	nonIDM	nonIDM
S1_2705979	1	2705979	IDM	nonIDM	nonIDM
S1_2708183	1	2708183	nonIDM	nonIDM	nonIDM
S1_2708260	1	2708260	IDM	nonIDM	nonIDM
S1_2708294	1	2708294	nonIDM	nonIDM	nonIDM
S1_2730019	1	2730019	IDM	nonIDM	nonIDM
S1_2736323	1	2736323	nonIDM	nonIDM	nonIDM
S1_2752474	1	2752474	nonIDM	nonIDM	nonIDM
S1_2753239	1	2753239	nonIDM	nonIDM	nonIDM
S1_2753397	1	2753397	nonIDM	nonIDM	IDM
S1_2753403	1	2753403	nonIDM	IDM	IDM
S1_2753442	1	2753442	IDM	nonIDM	nonIDM
S1_2816664	1	2816664	nonIDM	nonIDM	nonIDM
S1_2983724	1	2983724	nonIDM	nonIDM	nonIDM
S1_2999604	1	2999604	nonIDM	nonIDM	nonIDM
S1_2999628	1	2999628	IDM	nonIDM	nonIDM
S1_3026491	1	3026491	nonIDM	nonIDM	nonIDM
S1_3028563	1	3028563	nonIDM	nonIDM	nonIDM
S1_3028568	1	3028568	nonIDM	nonIDM	nonIDM
S1_3031141	1	3031141	nonIDM	nonIDM	nonIDM
S1_3037303	1	3037303	IDM	nonIDM	nonIDM
S1_3037334	1	3037334	nonIDM	nonIDM	nonIDM
S1_3037340	1	3037340	IDM	IDM	nonIDM
S1_3037387	1	3037387	nonIDM	nonIDM	nonIDM
S1_3047789	1	3047789	nonIDM	nonIDM	nonIDM
S1_3047840	1	3047840	IDM	nonIDM	nonIDM
S1_3063589	1	3063589	nonIDM	nonIDM	nonIDM
S1_3071113	1	3071113	nonIDM	nonIDM	nonIDM
S1_3071134	1	3071134	nonIDM	nonIDM	nonIDM
S1_3071141	1	3071141	nonIDM	nonIDM	nonIDM
S1_3073360	1	3073360	nonIDM	nonIDM	nonIDM
S1_3073498	1	3073498	nonIDM	nonIDM	nonIDM
S1_3073708	1	3073708	nonIDM	nonIDM	nonIDM
S1_3073717	1	3073717	nonIDM	nonIDM	IDM
S1_3077765	1	3077765	IDM	nonIDM	nonIDM
S1_3084288	1	3084288	nonIDM	nonIDM	nonIDM
S1_3084319	1	3084319	nonIDM	IDM	IDM
S1_3084568	1	3084568	IDM	IDM	nonIDM
S1_3084577	1	3084577	nonIDM	nonIDM	nonIDM
S1_3084731	1	3084731	nonIDM	IDM	IDM
S1_3084751	1	3084751	nonIDM	nonIDM	nonIDM
S1_3096078	1	3096078	nonIDM	nonIDM	IDM
S1_3096447	1	3096447	nonIDM	nonIDM	nonIDM
S1_3096459	1	3096459	nonIDM	nonIDM	nonIDM
S1_3096464	1	3096464	IDM	nonIDM	nonIDM
S1_3096530	1	3096530	nonIDM	nonIDM	nonIDM
S1_3096738	1	3096738	nonIDM	nonIDM	nonIDM
S1_3096747	1	3096747	nonIDM	nonIDM	nonIDM
S1_3096757	1	3096757	IDM	nonIDM	nonIDM
S1_3097718	1	3097718	nonIDM	nonIDM	nonIDM
S1_3131696	1	3131696	IDM	nonIDM	nonIDM
S1_3131701	1	3131701	nonIDM	nonIDM	nonIDM
S1_3134590	1	3134590	nonIDM	nonIDM	nonIDM
S1_3134599	1	3134599	nonIDM	nonIDM	nonIDM
S1_3192411	1	3192411	nonIDM	nonIDM	nonIDM
S1_3208892	1	3208892	nonIDM	nonIDM	nonIDM
S1_3208907	1	3208907	nonIDM	nonIDM	nonIDM
S1_3267030	1	3267030	nonIDM	nonIDM	nonIDM
S1_3267041	1	3267041	nonIDM	nonIDM	nonIDM
S1_3267232	1	3267232	nonIDM	IDM	nonIDM
S1_3274544	1	3274544	IDM	nonIDM	nonIDM
S1_3274560	1	3274560	nonIDM	nonIDM	nonIDM
S1_3275226	1	3275226	IDM	nonIDM	IDM
S1_3410782	1	3410782	nonIDM	nonIDM	nonIDM
S1_3410865	1	3410865	nonIDM	nonIDM	nonIDM
S1_3416158	1	3416158	nonIDM	IDM	nonIDM
S1_3416164	1	3416164	nonIDM	nonIDM	nonIDM
S1_3416181	1	3416181	nonIDM	nonIDM	nonIDM
S1_3416218	1	3416218	nonIDM	nonIDM	nonIDM
S1_3416405	1	3416405	nonIDM	nonIDM	nonIDM
S1_3425782	1	3425782	nonIDM	nonIDM	nonIDM
S1_3425802	1	3425802	nonIDM	nonIDM	nonIDM
S1_3425897	1	3425897	nonIDM	nonIDM	nonIDM
S1_3425997	1	3425997	nonIDM	IDM	nonIDM
S1_3443860	1	3443860	nonIDM	nonIDM	nonIDM
S1_3443930	1	3443930	nonIDM	IDM	nonIDM
S1_3443952	1	3443952	nonIDM	nonIDM	nonIDM
S1_3443984	1	3443984	nonIDM	IDM	nonIDM
S1_3444014	1	3444014	nonIDM	nonIDM	nonIDM
S1_3455734	1	3455734	nonIDM	nonIDM	nonIDM
S1_3463185	1	3463185	nonIDM	nonIDM	IDM
S1_3463212	1	3463212	nonIDM	nonIDM	IDM
S1_3463451	1	3463451	nonIDM	nonIDM	nonIDM
S1_3463468	1	3463468	nonIDM	nonIDM	IDM
S1_3463565	1	3463565	nonIDM	nonIDM	nonIDM
S1_3463779	1	3463779	nonIDM	nonIDM	IDM
S1_3463838	1	3463838	nonIDM	nonIDM	nonIDM
S1_3463927	1	3463927	nonIDM	nonIDM	nonIDM
S1_3464033	1	3464033	nonIDM	nonIDM	nonIDM
S1_3465753	1	3465753	nonIDM	nonIDM	IDM
S1_3465794	1	3465794	nonIDM	nonIDM	nonIDM
S1_3468183	1	3468183	nonIDM	nonIDM	nonIDM
S1_3469226	1	3469226	IDM	IDM	nonIDM
S1_3478442	1	3478442	nonIDM	nonIDM	nonIDM
S1_3486022	1	3486022	nonIDM	nonIDM	nonIDM
S1_3490064	1	3490064	nonIDM	nonIDM	nonIDM
S1_3490082	1	3490082	nonIDM	nonIDM	nonIDM
S1_3492323	1	3492323	nonIDM	nonIDM	nonIDM
S1_3492350	1	3492350	nonIDM	nonIDM	IDM
S1_3502157	1	3502157	nonIDM	nonIDM	nonIDM
S1_3502281	1	3502281	IDM	nonIDM	nonIDM
S1_3503337	1	3503337	nonIDM	IDM	nonIDM
S1_3532500	1	3532500	nonIDM	nonIDM	nonIDM
S1_3532526	1	3532526	nonIDM	IDM	nonIDM
S1_3532570	1	3532570	nonIDM	nonIDM	nonIDM
S1_3532578	1	3532578	IDM	nonIDM	nonIDM
S1_3532776	1	3532776	nonIDM	IDM	IDM
S1_3554587	1	3554587	nonIDM	nonIDM	nonIDM
S1_3555409	1	3555409	nonIDM	nonIDM	nonIDM
S1_3556174	1	3556174	nonIDM	nonIDM	nonIDM
S1_3556207	1	3556207	nonIDM	nonIDM	nonIDM
S1_3556424	1	3556424	nonIDM	IDM	nonIDM
S1_3556549	1	3556549	nonIDM	nonIDM	IDM
S1_3585162	1	3585162	nonIDM	nonIDM	nonIDM
S1_3593214	1	3593214	nonIDM	nonIDM	nonIDM
S1_3593229	1	3593229	nonIDM	nonIDM	IDM
S1_3600041	1	3600041	nonIDM	nonIDM	nonIDM
S1_3604364	1	3604364	nonIDM	nonIDM	IDM
S1_3604389	1	3604389	nonIDM	nonIDM	nonIDM
S1_3604394	1	3604394	nonIDM	nonIDM	IDM
S1_3616117	1	3616117	nonIDM	nonIDM	IDM
S1_3616576	1	3616576	nonIDM	nonIDM	IDM
S1_3616628	1	3616628	IDM	nonIDM	nonIDM
S1_3623534	1	3623534	nonIDM	nonIDM	nonIDM
S1_3623539	1	3623539	nonIDM	nonIDM	nonIDM
S1_3623582	1	3623582	nonIDM	nonIDM	nonIDM
S1_3625444	1	3625444	nonIDM	nonIDM	nonIDM
S1_3625590	1	3625590	nonIDM	nonIDM	nonIDM
S1_3625612	1	3625612	nonIDM	nonIDM	IDM
S1_3625741	1	3625741	nonIDM	nonIDM	IDM
S1_3625755	1	3625755	nonIDM	nonIDM	nonIDM
S1_3625785	1	3625785	nonIDM	nonIDM	nonIDM
S1_3638240	1	3638240	nonIDM	nonIDM	IDM
S1_3638279	1	3638279	IDM	nonIDM	nonIDM
S1_3638307	1	3638307	nonIDM	nonIDM	IDM
S1_3638327	1	3638327	nonIDM	nonIDM	nonIDM
S1_3648760	1	3648760	nonIDM	nonIDM	nonIDM
S1_3657040	1	3657040	nonIDM	nonIDM	nonIDM
S1_3657065	1	3657065	nonIDM	nonIDM	nonIDM
S1_3666675	1	3666675	nonIDM	nonIDM	nonIDM
S1_3667179	1	3667179	nonIDM	nonIDM	nonIDM
S1_3667743	1	3667743	nonIDM	nonIDM	IDM
S1_3668517	1	3668517	nonIDM	nonIDM	nonIDM
S1_3670409	1	3670409	nonIDM	nonIDM	nonIDM
S1_3670558	1	3670558	IDM	nonIDM	nonIDM
S1_3670581	1	3670581	nonIDM	nonIDM	nonIDM
S1_3670733	1	3670733	nonIDM	nonIDM	nonIDM
S1_3670750	1	3670750	IDM	nonIDM	nonIDM
S1_3676781	1	3676781	nonIDM	nonIDM	nonIDM
S1_3679142	1	3679142	nonIDM	nonIDM	nonIDM
S1_3679164	1	3679164	nonIDM	IDM	nonIDM
S1_3706113	1	3706113	nonIDM	nonIDM	nonIDM
S1_3710230	1	3710230	nonIDM	nonIDM	nonIDM
S1_3710360	1	3710360	nonIDM	nonIDM	nonIDM
S1_3710644	1	3710644	nonIDM	nonIDM	nonIDM
S1_3710666	1	3710666	nonIDM	nonIDM	IDM
S1_3710684	1	3710684	nonIDM	nonIDM	nonIDM
S1_3716356	1	3716356	nonIDM	nonIDM	IDM
S1_3716599	1	3716599	nonIDM	nonIDM	nonIDM
S1_3720092	1	3720092	nonIDM	nonIDM	nonIDM
S1_3720386	1	3720386	nonIDM	nonIDM	IDM
S1_3720432	1	3720432	nonIDM	nonIDM	nonIDM
S1_3754766	1	3754766	nonIDM	IDM	nonIDM
S1_3763612	1	3763612	nonIDM	nonIDM	IDM
S1_3781436	1	3781436	IDM	nonIDM	nonIDM
S1_3781504	1	3781504	nonIDM	nonIDM	nonIDM
S1_3783953	1	3783953	IDM	nonIDM	nonIDM
S1_3784391	1	3784391	nonIDM	nonIDM	nonIDM
S1_3785919	1	3785919	nonIDM	nonIDM	nonIDM
S1_3859382	1	3859382	nonIDM	nonIDM	nonIDM
S1_3859440	1	3859440	nonIDM	nonIDM	nonIDM
S1_3859470	1	3859470	nonIDM	nonIDM	nonIDM
S1_3859506	1	3859506	nonIDM	nonIDM	nonIDM
S1_3859515	1	3859515	nonIDM	nonIDM	IDM
S1_3866988	1	3866988	IDM	nonIDM	nonIDM
S1_3867064	1	3867064	nonIDM	nonIDM	IDM
S1_3867075	1	3867075	nonIDM	nonIDM	nonIDM
S1_3867093	1	3867093	nonIDM	nonIDM	nonIDM
S1_3867276	1	3867276	nonIDM	nonIDM	nonIDM
S1_3874868	1	3874868	IDM	nonIDM	nonIDM
S1_3874894	1	3874894	nonIDM	nonIDM	nonIDM
S1_3878444	1	3878444	nonIDM	IDM	IDM
S1_3997280	1	3997280	nonIDM	IDM	nonIDM
S1_3997316	1	3997316	nonIDM	IDM	nonIDM
S1_3997330	1	3997330	nonIDM	nonIDM	nonIDM
S1_3997443	1	3997443	IDM	nonIDM	nonIDM
S1_4006147	1	4006147	nonIDM	IDM	nonIDM
S1_4007919	1	4007919	nonIDM	nonIDM	IDM
S1_4007943	1	4007943	nonIDM	nonIDM	IDM
S1_4009368	1	4009368	nonIDM	IDM	nonIDM
S1_4010046	1	4010046	nonIDM	nonIDM	nonIDM
S1_4010057	1	4010057	nonIDM	nonIDM	nonIDM
S1_4010073	1	4010073	nonIDM	nonIDM	nonIDM
S1_4017450	1	4017450	IDM	nonIDM	nonIDM
S1_4017490	1	4017490	nonIDM	nonIDM	nonIDM
S1_4018540	1	4018540	nonIDM	nonIDM	nonIDM
S1_4020079	1	4020079	nonIDM	nonIDM	nonIDM
S1_4023171	1	4023171	nonIDM	nonIDM	nonIDM
S1_4023177	1	4023177	nonIDM	nonIDM	nonIDM
S1_4023191	1	4023191	nonIDM	nonIDM	nonIDM
S1_4037744	1	4037744	IDM	nonIDM	nonIDM
S1_4048202	1	4048202	nonIDM	nonIDM	nonIDM
S1_4048350	1	4048350	nonIDM	nonIDM	nonIDM
S1_4048387	1	4048387	nonIDM	nonIDM	nonIDM
S1_4072062	1	4072062	nonIDM	nonIDM	nonIDM
S1_4072102	1	4072102	nonIDM	nonIDM	nonIDM
S1_4094612	1	4094612	nonIDM	nonIDM	nonIDM
S1_4098674	1	4098674	nonIDM	nonIDM	nonIDM
S1_4098850	1	4098850	nonIDM	nonIDM	nonIDM
S1_4098928	1	4098928	nonIDM	nonIDM	IDM
S1_4098967	1	4098967	nonIDM	nonIDM	nonIDM
S1_4098973	1	4098973	nonIDM	IDM	IDM
S1_4099009	1	4099009	nonIDM	nonIDM	nonIDM
S1_4099014	1	4099014	nonIDM	nonIDM	nonIDM
S1_4140131	1	4140131	nonIDM	nonIDM	nonIDM
S1_4141369	1	4141369	nonIDM	IDM	nonIDM
S1_4141403	1	4141403	IDM	IDM	nonIDM
S1_4141418	1	4141418	nonIDM	nonIDM	nonIDM
S1_4141459	1	4141459	nonIDM	IDM	IDM
S1_4141506	1	4141506	nonIDM	nonIDM	nonIDM
S1_4141541	1	4141541	nonIDM	nonIDM	nonIDM
S1_4141598	1	4141598	nonIDM	nonIDM	nonIDM
S1_4141739	1	4141739	nonIDM	IDM	nonIDM
S1_4141760	1	4141760	nonIDM	nonIDM	IDM
S1_4148837	1	4148837	nonIDM	nonIDM	nonIDM
S1_4153597	1	4153597	nonIDM	nonIDM	nonIDM
S1_4153715	1	4153715	nonIDM	nonIDM	nonIDM
S1_4154066	1	4154066	nonIDM	IDM	nonIDM
S1_4265507	1	4265507	nonIDM	nonIDM	nonIDM
S1_4265515	1	4265515	nonIDM	nonIDM	nonIDM
S1_4265533	1	4265533	nonIDM	nonIDM	IDM
S1_4265700	1	4265700	nonIDM	nonIDM	nonIDM
S1_4265802	1	4265802	nonIDM	nonIDM	nonIDM
S1_4270204	1	4270204	IDM	nonIDM	nonIDM
S1_4270230	1	4270230	nonIDM	nonIDM	nonIDM
S1_4270241	1	4270241	nonIDM	nonIDM	nonIDM
S1_4270652	1	4270652	nonIDM	IDM	nonIDM
S1_4270770	1	4270770	nonIDM	nonIDM	nonIDM
S1_4271825	1	4271825	IDM	nonIDM	nonIDM
S1_4271830	1	4271830	nonIDM	nonIDM	nonIDM
S1_4271864	1	4271864	nonIDM	nonIDM	nonIDM
S1_4271877	1	4271877	nonIDM	nonIDM	nonIDM
S1_4271887	1	4271887	nonIDM	IDM	nonIDM
S1_4271903	1	4271903	nonIDM	nonIDM	nonIDM
S1_4271911	1	4271911	nonIDM	nonIDM	nonIDM
S1_4271927	1	4271927	IDM	nonIDM	nonIDM
S1_4271963	1	4271963	nonIDM	nonIDM	nonIDM
S1_4286608	1	4286608	IDM	nonIDM	nonIDM
S1_4357055	1	4357055	nonIDM	nonIDM	nonIDM
S1_4357086	1	4357086	nonIDM	nonIDM	nonIDM
S1_4357094	1	4357094	nonIDM	IDM	nonIDM
S1_4357115	1	4357115	nonIDM	nonIDM	nonIDM
S1_4357199	1	4357199	nonIDM	nonIDM	nonIDM
S1_4357325	1	4357325	nonIDM	nonIDM	nonIDM
S1_4365599	1	4365599	nonIDM	IDM	nonIDM
S1_4365880	1	4365880	nonIDM	nonIDM	nonIDM
S1_4365947	1	4365947	nonIDM	nonIDM	nonIDM
S1_4369804	1	4369804	nonIDM	nonIDM	IDM
S1_4369840	1	4369840	nonIDM	IDM	nonIDM
S1_4371286	1	4371286	nonIDM	IDM	nonIDM
S1_4371403	1	4371403	nonIDM	IDM	nonIDM
S1_4371873	1	4371873	nonIDM	nonIDM	nonIDM
S1_4371886	1	4371886	nonIDM	nonIDM	nonIDM
S1_4375964	1	4375964	nonIDM	nonIDM	nonIDM
S1_4375969	1	4375969	nonIDM	IDM	nonIDM
S1_4376144	1	4376144	nonIDM	nonIDM	nonIDM
S1_4376201	1	4376201	nonIDM	nonIDM	nonIDM
S1_4382596	1	4382596	nonIDM	nonIDM	nonIDM
S1_4384480	1	4384480	nonIDM	nonIDM	nonIDM
S1_4392189	1	4392189	nonIDM	nonIDM	nonIDM
S1_4392194	1	4392194	IDM	nonIDM	nonIDM
S1_4392221	1	4392221	IDM	nonIDM	IDM
S1_4395531	1	4395531	nonIDM	nonIDM	nonIDM
S1_4398916	1	4398916	nonIDM	nonIDM	nonIDM
S1_4399257	1	4399257	nonIDM	nonIDM	nonIDM
S1_4399347	1	4399347	nonIDM	nonIDM	nonIDM
S1_4399376	1	4399376	nonIDM	nonIDM	nonIDM
S1_4400963	1	4400963	nonIDM	nonIDM	nonIDM
S1_4401209	1	4401209	nonIDM	nonIDM	nonIDM
S1_4401249	1	4401249	nonIDM	nonIDM	nonIDM
S1_4402202	1	4402202	nonIDM	nonIDM	nonIDM
S1_4412679	1	4412679	nonIDM	nonIDM	IDM
S1_4423877	1	4423877	IDM	nonIDM	nonIDM
S1_4424658	1	4424658	IDM	nonIDM	IDM
S1_4424695	1	4424695	nonIDM	nonIDM	nonIDM
S1_4424963	1	4424963	nonIDM	nonIDM	nonIDM
S1_4426072	1	4426072	nonIDM	nonIDM	nonIDM
S1_4426227	1	4426227	nonIDM	nonIDM	nonIDM
S1_4426453	1	4426453	IDM	nonIDM	nonIDM
S1_4429990	1	4429990	IDM	nonIDM	nonIDM
S1_4430000	1	4430000	nonIDM	nonIDM	nonIDM
S1_4430018	1	4430018	nonIDM	nonIDM	IDM
S1_4437649	1	4437649	nonIDM	nonIDM	nonIDM
S1_4438598	1	4438598	nonIDM	IDM	nonIDM
S1_4438604	1	4438604	nonIDM	nonIDM	nonIDM
S1_4442142	1	4442142	nonIDM	nonIDM	nonIDM
S1_4442275	1	4442275	nonIDM	IDM	nonIDM
S1_4442668	1	4442668	nonIDM	nonIDM	nonIDM
S1_4442680	1	4442680	IDM	nonIDM	nonIDM
S1_4442714	1	4442714	IDM	nonIDM	IDM
S1_4443631	1	4443631	nonIDM	nonIDM	nonIDM
S1_4458519	1	4458519	nonIDM	nonIDM	nonIDM
S1_4458566	1	4458566	nonIDM	nonIDM	nonIDM
S1_4458628	1	4458628	IDM	nonIDM	nonIDM
S1_4458637	1	4458637	IDM	nonIDM	nonIDM
S1_4458642	1	4458642	nonIDM	nonIDM	nonIDM
S1_4496380	1	4496380	IDM	nonIDM	nonIDM
S1_4496435	1	4496435	nonIDM	nonIDM	nonIDM
S1_4511809	1	4511809	nonIDM	nonIDM	nonIDM
S1_4511841	1	4511841	nonIDM	nonIDM	nonIDM
S1_4531522	1	4531522	nonIDM	nonIDM	nonIDM
S1_4533546	1	4533546	IDM	nonIDM	IDM
S1_4533569	1	4533569	IDM	nonIDM	nonIDM
S1_4564191	1	4564191	nonIDM	nonIDM	nonIDM
S1_4565522	1	4565522	nonIDM	nonIDM	nonIDM
S1_4565560	1	4565560	nonIDM	nonIDM	nonIDM
S1_4573650	1	4573650	IDM	nonIDM	nonIDM
S1_4573682	1	4573682	nonIDM	nonIDM	nonIDM
S1_4576155	1	4576155	nonIDM	nonIDM	nonIDM
S1_4576167	1	4576167	nonIDM	nonIDM	nonIDM
S1_4610386	1	4610386	nonIDM	nonIDM	IDM
S1_4664334	1	4664334	nonIDM	IDM	nonIDM
S1_4664356	1	4664356	nonIDM	nonIDM	nonIDM
S1_4667911	1	4667911	nonIDM	nonIDM	IDM
S1_4668044	1	4668044	nonIDM	nonIDM	IDM
S1_4668132	1	4668132	nonIDM	nonIDM	nonIDM
S1_4673804	1	4673804	nonIDM	nonIDM	nonIDM
S1_4687582	1	4687582	nonIDM	nonIDM	nonIDM
S1_4687590	1	4687590	nonIDM	IDM	IDM
S1_4696096	1	4696096	nonIDM	nonIDM	IDM
S1_4747130	1	4747130	IDM	nonIDM	IDM
S1_4747170	1	4747170	IDM	nonIDM	nonIDM
S1_4752301	1	4752301	nonIDM	nonIDM	nonIDM
S1_4752790	1	4752790	nonIDM	nonIDM	nonIDM
S1_4752817	1	4752817	IDM	nonIDM	nonIDM
S1_4752857	1	4752857	nonIDM	nonIDM	IDM
S1_4752869	1	4752869	IDM	nonIDM	nonIDM
S1_4753261	1	4753261	nonIDM	nonIDM	IDM
S1_4753288	1	4753288	nonIDM	nonIDM	nonIDM
S1_4766248	1	4766248	nonIDM	nonIDM	nonIDM
S1_4766296	1	4766296	nonIDM	nonIDM	IDM
S1_4766303	1	4766303	nonIDM	IDM	nonIDM
S1_4766340	1	4766340	nonIDM	nonIDM	nonIDM
S1_4782380	1	4782380	IDM	nonIDM	nonIDM
S1_4782414	1	4782414	nonIDM	nonIDM	nonIDM
S1_4782585	1	4782585	nonIDM	nonIDM	nonIDM
S1_4782623	1	4782623	nonIDM	nonIDM	nonIDM
S1_4782697	1	4782697	nonIDM	nonIDM	nonIDM
S1_4782749	1	4782749	nonIDM	nonIDM	nonIDM
S1_4782968	1	4782968	nonIDM	nonIDM	nonIDM
S1_4782992	1	4782992	nonIDM	nonIDM	nonIDM
S1_4814833	1	4814833	nonIDM	IDM	nonIDM
S1_4814853	1	4814853	nonIDM	nonIDM	IDM
S1_4855733	1	4855733	nonIDM	nonIDM	nonIDM
S1_4857025	1	4857025	nonIDM	nonIDM	nonIDM
S1_4861188	1	4861188	nonIDM	nonIDM	IDM
S1_4861218	1	4861218	nonIDM	nonIDM	nonIDM
S1_4890146	1	4890146	nonIDM	nonIDM	nonIDM
S1_4890220	1	4890220	nonIDM	IDM	IDM
S1_4890290	1	4890290	IDM	nonIDM	nonIDM
S1_4890330	1	4890330	nonIDM	nonIDM	nonIDM
S1_4890335	1	4890335	nonIDM	nonIDM	nonIDM
S1_4890344	1	4890344	nonIDM	nonIDM	nonIDM
S1_4894035	1	4894035	nonIDM	nonIDM	nonIDM
S1_4894068	1	4894068	nonIDM	nonIDM	nonIDM
S1_4894810	1	4894810	nonIDM	nonIDM	nonIDM
S1_4894940	1	4894940	nonIDM	nonIDM	nonIDM
S1_4895008	1	4895008	IDM	nonIDM	IDM
S1_4895031	1	4895031	nonIDM	nonIDM	nonIDM
S1_4895268	1	4895268	nonIDM	nonIDM	nonIDM
S1_4896289	1	4896289	nonIDM	nonIDM	nonIDM
S1_4919374	1	4919374	nonIDM	nonIDM	IDM
S1_4928947	1	4928947	IDM	IDM	nonIDM
S1_4929751	1	4929751	nonIDM	nonIDM	nonIDM
S1_4935603	1	4935603	nonIDM	IDM	nonIDM
S1_4935645	1	4935645	IDM	IDM	nonIDM
S1_4935777	1	4935777	nonIDM	nonIDM	nonIDM
S1_4935782	1	4935782	nonIDM	nonIDM	nonIDM
S1_4935801	1	4935801	nonIDM	IDM	nonIDM
S1_4935815	1	4935815	IDM	nonIDM	nonIDM
S1_4935916	1	4935916	nonIDM	nonIDM	nonIDM
S1_4935935	1	4935935	nonIDM	nonIDM	nonIDM
S1_4936152	1	4936152	IDM	nonIDM	nonIDM
S1_4980044	1	4980044	nonIDM	nonIDM	nonIDM
S1_5088188	1	5088188	nonIDM	IDM	nonIDM
S1_5088334	1	5088334	nonIDM	nonIDM	nonIDM
S1_5092230	1	5092230	nonIDM	IDM	nonIDM
S1_5092296	1	5092296	nonIDM	nonIDM	nonIDM
S1_5092305	1	5092305	nonIDM	nonIDM	nonIDM
S1_5130716	1	5130716	nonIDM	nonIDM	nonIDM
S1_5131376	1	5131376	nonIDM	nonIDM	nonIDM
S1_5134840	1	5134840	nonIDM	nonIDM	nonIDM
S1_5134879	1	5134879	IDM	nonIDM	nonIDM
S1_5138042	1	5138042	IDM	nonIDM	nonIDM
S1_5138070	1	5138070	nonIDM	nonIDM	nonIDM
S1_5148207	1	5148207	nonIDM	nonIDM	nonIDM
S1_5151992	1	5151992	nonIDM	nonIDM	IDM
S1_5163712	1	5163712	nonIDM	nonIDM	nonIDM
S1_5167969	1	5167969	nonIDM	IDM	nonIDM
S1_5170037	1	5170037	nonIDM	IDM	nonIDM
S1_5170066	1	5170066	nonIDM	IDM	nonIDM
S1_5170236	1	5170236	nonIDM	nonIDM	nonIDM
S1_5178655	1	5178655	nonIDM	nonIDM	nonIDM
S1_5178662	1	5178662	nonIDM	nonIDM	nonIDM
S1_5178671	1	5178671	nonIDM	nonIDM	nonIDM
S1_5178763	1	5178763	nonIDM	nonIDM	IDM
S1_5178968	1	5178968	nonIDM	nonIDM	nonIDM
S1_5179086	1	5179086	nonIDM	nonIDM	nonIDM
S1_5180638	1	5180638	nonIDM	nonIDM	IDM
S1_5180680	1	5180680	IDM	nonIDM	nonIDM
S1_5182011	1	5182011	nonIDM	IDM	nonIDM
S1_5182175	1	5182175	IDM	IDM	nonIDM
S1_5195279	1	5195279	nonIDM	IDM	nonIDM
S1_5209356	1	5209356	nonIDM	IDM	nonIDM
S1_5209377	1	5209377	IDM	IDM	nonIDM
S1_5209382	1	5209382	IDM	nonIDM	nonIDM
S1_5244040	1	5244040	nonIDM	nonIDM	nonIDM
S1_5256078	1	5256078	IDM	nonIDM	nonIDM
S1_5256199	1	5256199	nonIDM	nonIDM	IDM
S1_5256698	1	5256698	nonIDM	nonIDM	nonIDM
S1_5256756	1	5256756	nonIDM	nonIDM	nonIDM
S1_5256862	1	5256862	nonIDM	nonIDM	nonIDM
S1_5256870	1	5256870	nonIDM	nonIDM	nonIDM
S1_5257099	1	5257099	IDM	nonIDM	nonIDM
S1_5268710	1	5268710	nonIDM	IDM	nonIDM
S1_5279860	1	5279860	nonIDM	nonIDM	nonIDM
S1_5279883	1	5279883	nonIDM	nonIDM	nonIDM
S1_5286256	1	5286256	nonIDM	nonIDM	IDM
S1_5298513	1	5298513	nonIDM	nonIDM	nonIDM
S1_5298532	1	5298532	IDM	nonIDM	nonIDM
S1_5299732	1	5299732	nonIDM	IDM	IDM
S1_5299746	1	5299746	IDM	nonIDM	nonIDM
S1_5300329	1	5300329	nonIDM	nonIDM	IDM
S1_5300345	1	5300345	nonIDM	nonIDM	nonIDM
S1_5300564	1	5300564	IDM	nonIDM	nonIDM
S1_5300607	1	5300607	nonIDM	nonIDM	IDM
S1_5312881	1	5312881	nonIDM	nonIDM	nonIDM
S1_5312939	1	5312939	nonIDM	nonIDM	nonIDM
S1_5313170	1	5313170	IDM	nonIDM	nonIDM
S1_5313192	1	5313192	nonIDM	nonIDM	nonIDM
S1_5328330	1	5328330	nonIDM	IDM	nonIDM
S1_5332930	1	5332930	nonIDM	nonIDM	nonIDM
S1_5333115	1	5333115	nonIDM	IDM	nonIDM
S1_5333132	1	5333132	nonIDM	nonIDM	IDM
S1_5333324	1	5333324	nonIDM	nonIDM	nonIDM
S1_5333343	1	5333343	nonIDM	IDM	nonIDM
S1_5333386	1	5333386	IDM	IDM	IDM
S1_5333396	1	5333396	IDM	nonIDM	nonIDM
S1_5333418	1	5333418	IDM	nonIDM	IDM
S1_5382683	1	5382683	nonIDM	nonIDM	nonIDM
S1_5404338	1	5404338	IDM	nonIDM	nonIDM
S1_5409255	1	5409255	nonIDM	IDM	IDM
S1_5409341	1	5409341	nonIDM	nonIDM	nonIDM
S1_5414164	1	5414164	nonIDM	nonIDM	IDM
S1_5414407	1	5414407	nonIDM	nonIDM	nonIDM
S1_5414426	1	5414426	nonIDM	nonIDM	nonIDM
S1_6155551	1	6155551	nonIDM	nonIDM	nonIDM
S1_6222399	1	6222399	nonIDM	nonIDM	nonIDM
S1_6222444	1	6222444	nonIDM	nonIDM	nonIDM
S1_6222543	1	6222543	nonIDM	nonIDM	nonIDM
S1_6222550	1	6222550	nonIDM	nonIDM	nonIDM
S1_6222600	1	6222600	IDM	nonIDM	nonIDM
S1_6222612	1	6222612	nonIDM	nonIDM	nonIDM
S1_6228608	1	6228608	nonIDM	nonIDM	nonIDM
S1_6228613	1	6228613	IDM	nonIDM	nonIDM
S1_6228641	1	6228641	nonIDM	nonIDM	IDM
S1_6228661	1	6228661	nonIDM	IDM	nonIDM
S1_6231910	1	6231910	IDM	nonIDM	nonIDM
S1_6232002	1	6232002	nonIDM	nonIDM	nonIDM
S1_6232063	1	6232063	nonIDM	IDM	nonIDM
S1_6232076	1	6232076	nonIDM	nonIDM	nonIDM
S1_6232092	1	6232092	nonIDM	nonIDM	nonIDM
S1_6234380	1	6234380	nonIDM	nonIDM	nonIDM
S1_6234401	1	6234401	nonIDM	nonIDM	nonIDM
S1_6235687	1	6235687	nonIDM	nonIDM	nonIDM
S1_6236366	1	6236366	nonIDM	nonIDM	IDM
S1_6237932	1	6237932	nonIDM	nonIDM	nonIDM
S1_6237976	1	6237976	nonIDM	nonIDM	IDM
S1_6238104	1	6238104	nonIDM	nonIDM	nonIDM
S1_6238139	1	6238139	nonIDM	nonIDM	IDM
S1_6238220	1	6238220	nonIDM	nonIDM	IDM
S1_6238252	1	6238252	IDM	nonIDM	nonIDM
S1_6238258	1	6238258	nonIDM	IDM	nonIDM
S1_6238306	1	6238306	nonIDM	nonIDM	nonIDM
S1_6238353	1	6238353	nonIDM	nonIDM	nonIDM
S1_6238360	1	6238360	IDM	IDM	nonIDM
S1_6238380	1	6238380	nonIDM	nonIDM	nonIDM
S1_6238405	1	6238405	nonIDM	nonIDM	nonIDM
S1_6238486	1	6238486	nonIDM	nonIDM	nonIDM
S1_6241319	1	6241319	nonIDM	nonIDM	nonIDM
S1_6241429	1	6241429	nonIDM	nonIDM	nonIDM
S1_6263640	1	6263640	nonIDM	nonIDM	nonIDM
S1_6263754	1	6263754	nonIDM	nonIDM	nonIDM
S1_6264725	1	6264725	nonIDM	nonIDM	nonIDM
S1_6264768	1	6264768	nonIDM	nonIDM	nonIDM
S1_6264823	1	6264823	nonIDM	nonIDM	nonIDM
S1_6265293	1	6265293	IDM	IDM	nonIDM
S1_6267268	1	6267268	nonIDM	nonIDM	IDM
S1_6267275	1	6267275	nonIDM	nonIDM	IDM
S1_6267344	1	6267344	nonIDM	nonIDM	IDM
S1_6267592	1	6267592	nonIDM	IDM	nonIDM
S1_6267664	1	6267664	nonIDM	nonIDM	nonIDM
S1_6267684	1	6267684	nonIDM	nonIDM	nonIDM
S1_6267932	1	6267932	IDM	nonIDM	IDM
S1_6271931	1	6271931	nonIDM	nonIDM	nonIDM
S1_6272663	1	6272663	nonIDM	nonIDM	IDM
S1_6275302	1	6275302	nonIDM	nonIDM	IDM
S1_6287598	1	6287598	nonIDM	nonIDM	nonIDM
S1_6287666	1	6287666	nonIDM	IDM	nonIDM
S1_6294463	1	6294463	nonIDM	nonIDM	nonIDM
S1_6294625	1	6294625	nonIDM	nonIDM	nonIDM
S1_6294710	1	6294710	nonIDM	IDM	nonIDM
S1_6294883	1	6294883	nonIDM	nonIDM	nonIDM
S1_6295180	1	6295180	IDM	nonIDM	IDM
S1_6295216	1	6295216	nonIDM	nonIDM	nonIDM
S1_6295255	1	6295255	nonIDM	nonIDM	nonIDM
S1_6295274	1	6295274	IDM	nonIDM	IDM
S1_6295282	1	6295282	nonIDM	nonIDM	IDM
S1_6295339	1	6295339	nonIDM	IDM	nonIDM
S1_6295396	1	6295396	nonIDM	nonIDM	nonIDM
S1_6295738	1	6295738	nonIDM	IDM	nonIDM
S1_6298639	1	6298639	nonIDM	nonIDM	nonIDM
S1_6298670	1	6298670	nonIDM	nonIDM	nonIDM
S1_6302382	1	6302382	nonIDM	nonIDM	nonIDM
S1_6302425	1	6302425	nonIDM	nonIDM	nonIDM
S1_6302623	1	6302623	nonIDM	nonIDM	nonIDM
S1_6302789	1	6302789	nonIDM	nonIDM	nonIDM
S1_6303390	1	6303390	nonIDM	nonIDM	nonIDM
S1_6305217	1	6305217	nonIDM	nonIDM	nonIDM
S1_6314845	1	6314845	nonIDM	nonIDM	nonIDM
S1_6314856	1	6314856	nonIDM	nonIDM	nonIDM
S1_6318988	1	6318988	IDM	nonIDM	nonIDM
S1_6323228	1	6323228	nonIDM	nonIDM	nonIDM
S1_6323238	1	6323238	nonIDM	nonIDM	nonIDM
S1_6324499	1	6324499	nonIDM	nonIDM	IDM
S1_6324522	1	6324522	IDM	IDM	nonIDM
S1_6324528	1	6324528	nonIDM	IDM	nonIDM
S1_6324615	1	6324615	IDM	nonIDM	nonIDM
S1_6324647	1	6324647	nonIDM	IDM	nonIDM
S1_6324684	1	6324684	nonIDM	nonIDM	nonIDM
S1_6324885	1	6324885	IDM	nonIDM	nonIDM
S1_6324939	1	6324939	IDM	nonIDM	nonIDM
S1_6324967	1	6324967	nonIDM	nonIDM	nonIDM
S1_6325036	1	6325036	IDM	nonIDM	nonIDM
S1_6325049	1	6325049	nonIDM	IDM	nonIDM
S1_6326906	1	6326906	nonIDM	nonIDM	nonIDM
S1_6326932	1	6326932	nonIDM	nonIDM	nonIDM
S1_6326950	1	6326950	nonIDM	nonIDM	nonIDM
S1_6326973	1	6326973	nonIDM	nonIDM	nonIDM
S1_6327073	1	6327073	nonIDM	IDM	nonIDM
S1_6327094	1	6327094	IDM	IDM	nonIDM
S1_6327112	1	6327112	nonIDM	nonIDM	nonIDM
S1_6329956	1	6329956	nonIDM	nonIDM	IDM
S1_6337279	1	6337279	nonIDM	nonIDM	nonIDM
S1_6339343	1	6339343	nonIDM	nonIDM	IDM
S1_6339352	1	6339352	nonIDM	nonIDM	nonIDM
S1_6339358	1	6339358	nonIDM	nonIDM	nonIDM
S1_6369712	1	6369712	nonIDM	nonIDM	IDM
S1_6369827	1	6369827	nonIDM	nonIDM	nonIDM
S1_6370505	1	6370505	nonIDM	nonIDM	nonIDM
S1_6371689	1	6371689	nonIDM	nonIDM	nonIDM
S1_6371712	1	6371712	nonIDM	nonIDM	nonIDM
S1_6379547	1	6379547	IDM	nonIDM	nonIDM
S1_6379625	1	6379625	nonIDM	nonIDM	nonIDM
S1_6379666	1	6379666	nonIDM	nonIDM	nonIDM
S1_6379754	1	6379754	nonIDM	nonIDM	IDM
S1_6380357	1	6380357	nonIDM	nonIDM	nonIDM
S1_6380438	1	6380438	nonIDM	nonIDM	nonIDM
S1_6380450	1	6380450	nonIDM	nonIDM	nonIDM
S1_6380480	1	6380480	nonIDM	nonIDM	nonIDM
S1_6380531	1	6380531	nonIDM	nonIDM	nonIDM
S1_6381060	1	6381060	nonIDM	nonIDM	nonIDM
S1_6382705	1	6382705	IDM	nonIDM	nonIDM
S1_6382938	1	6382938	nonIDM	nonIDM	nonIDM
S1_6387682	1	6387682	IDM	nonIDM	nonIDM
S1_6387710	1	6387710	nonIDM	nonIDM	nonIDM
S1_6387728	1	6387728	nonIDM	nonIDM	nonIDM
S1_6391710	1	6391710	IDM	nonIDM	nonIDM
S1_6391742	1	6391742	IDM	nonIDM	nonIDM
S1_6391839	1	6391839	nonIDM	nonIDM	nonIDM
S1_6398101	1	6398101	nonIDM	nonIDM	nonIDM
S1_6398123	1	6398123	nonIDM	nonIDM	nonIDM
S1_6398942	1	6398942	nonIDM	nonIDM	nonIDM
S1_6399771	1	6399771	nonIDM	nonIDM	nonIDM
S1_6410295	1	6410295	nonIDM	nonIDM	nonIDM
S1_6506358	1	6506358	nonIDM	nonIDM	nonIDM
S1_6506380	1	6506380	nonIDM	nonIDM	nonIDM
S1_6506393	1	6506393	nonIDM	nonIDM	nonIDM
S1_6525790	1	6525790	nonIDM	nonIDM	nonIDM
S1_6525808	1	6525808	nonIDM	nonIDM	nonIDM
S1_6525832	1	6525832	nonIDM	nonIDM	nonIDM
S1_6533591	1	6533591	nonIDM	nonIDM	IDM
S1_6535330	1	6535330	nonIDM	IDM	nonIDM
S1_6535363	1	6535363	nonIDM	nonIDM	nonIDM
S1_6555094	1	6555094	nonIDM	IDM	nonIDM
S1_6555758	1	6555758	nonIDM	nonIDM	nonIDM
S1_6589200	1	6589200	nonIDM	nonIDM	nonIDM
S1_6639790	1	6639790	nonIDM	nonIDM	IDM
S1_6639832	1	6639832	nonIDM	nonIDM	nonIDM
S1_6639973	1	6639973	nonIDM	nonIDM	nonIDM
S1_6640125	1	6640125	nonIDM	nonIDM	nonIDM
S1_6667507	1	6667507	IDM	nonIDM	nonIDM
S1_6667532	1	6667532	IDM	nonIDM	nonIDM
S1_6689283	1	6689283	nonIDM	IDM	nonIDM
S1_6689312	1	6689312	nonIDM	nonIDM	nonIDM
S1_6689354	1	6689354	nonIDM	IDM	nonIDM
S1_6689567	1	6689567	nonIDM	nonIDM	nonIDM
S1_6692913	1	6692913	nonIDM	nonIDM	nonIDM
S1_6696064	1	6696064	IDM	nonIDM	nonIDM
S1_6708477	1	6708477	nonIDM	nonIDM	nonIDM
S1_6710644	1	6710644	nonIDM	nonIDM	nonIDM
S1_6710649	1	6710649	nonIDM	nonIDM	nonIDM
S1_6710654	1	6710654	nonIDM	nonIDM	nonIDM
S1_6710721	1	6710721	nonIDM	nonIDM	nonIDM
S1_6712091	1	6712091	nonIDM	nonIDM	nonIDM
S1_6720832	1	6720832	nonIDM	nonIDM	nonIDM
S1_6793825	1	6793825	nonIDM	nonIDM	nonIDM
S1_6793850	1	6793850	nonIDM	nonIDM	nonIDM
S1_6793869	1	6793869	nonIDM	nonIDM	nonIDM
S1_6793874	1	6793874	nonIDM	nonIDM	IDM
S1_6795444	1	6795444	nonIDM	IDM	nonIDM
S1_6795471	1	6795471	nonIDM	nonIDM	nonIDM
S1_6798669	1	6798669	nonIDM	nonIDM	nonIDM
S1_6798793	1	6798793	nonIDM	nonIDM	nonIDM
S1_6798801	1	6798801	nonIDM	nonIDM	IDM
S1_6798814	1	6798814	IDM	IDM	nonIDM
S1_6803976	1	6803976	nonIDM	nonIDM	nonIDM
S1_6804129	1	6804129	nonIDM	nonIDM	nonIDM
S1_6806511	1	6806511	nonIDM	IDM	nonIDM
S1_6806516	1	6806516	nonIDM	nonIDM	nonIDM
S1_6806522	1	6806522	nonIDM	nonIDM	nonIDM
S1_6806879	1	6806879	nonIDM	nonIDM	nonIDM
S1_6806957	1	6806957	nonIDM	nonIDM	nonIDM
S1_6807046	1	6807046	nonIDM	nonIDM	nonIDM
S1_6807089	1	6807089	nonIDM	nonIDM	nonIDM
S1_6813531	1	6813531	nonIDM	nonIDM	IDM
S1_6813548	1	6813548	nonIDM	nonIDM	nonIDM
S1_6814555	1	6814555	nonIDM	nonIDM	IDM
S1_6814577	1	6814577	nonIDM	nonIDM	nonIDM
S1_6814585	1	6814585	nonIDM	nonIDM	IDM
S1_6814596	1	6814596	nonIDM	nonIDM	nonIDM
S1_6814876	1	6814876	nonIDM	nonIDM	nonIDM
S1_6816463	1	6816463	nonIDM	nonIDM	IDM
S1_6816499	1	6816499	nonIDM	nonIDM	nonIDM
S1_6816788	1	6816788	nonIDM	nonIDM	nonIDM
S1_6816818	1	6816818	nonIDM	nonIDM	nonIDM
S1_6817022	1	6817022	nonIDM	nonIDM	nonIDM
S1_6817038	1	6817038	IDM	nonIDM	nonIDM
S1_6817068	1	6817068	nonIDM	nonIDM	nonIDM
S1_6817073	1	6817073	nonIDM	nonIDM	nonIDM
S1_6829883	1	6829883	nonIDM	nonIDM	nonIDM
S1_6831272	1	6831272	nonIDM	nonIDM	IDM
S1_6831296	1	6831296	nonIDM	nonIDM	nonIDM
S1_6832579	1	6832579	nonIDM	nonIDM	nonIDM
S1_6832609	1	6832609	nonIDM	nonIDM	nonIDM
S1_6832621	1	6832621	nonIDM	nonIDM	nonIDM
S1_6833813	1	6833813	nonIDM	nonIDM	nonIDM
S1_6833878	1	6833878	nonIDM	nonIDM	nonIDM
S1_6874240	1	6874240	nonIDM	nonIDM	nonIDM
S1_6874330	1	6874330	nonIDM	nonIDM	nonIDM
S1_6874336	1	6874336	IDM	nonIDM	IDM
S1_6874443	1	6874443	nonIDM	nonIDM	nonIDM
S1_6874449	1	6874449	nonIDM	nonIDM	nonIDM
S1_6874466	1	6874466	nonIDM	IDM	nonIDM
S1_6874490	1	6874490	nonIDM	nonIDM	nonIDM
S1_6874936	1	6874936	nonIDM	nonIDM	nonIDM
S1_6875177	1	6875177	nonIDM	nonIDM	nonIDM
S1_6875210	1	6875210	nonIDM	nonIDM	nonIDM
S1_6875228	1	6875228	nonIDM	nonIDM	IDM
S1_6875235	1	6875235	nonIDM	nonIDM	nonIDM
S1_6875313	1	6875313	IDM	nonIDM	IDM
S1_6875322	1	6875322	nonIDM	nonIDM	nonIDM
S1_6875543	1	6875543	nonIDM	nonIDM	nonIDM
S1_6875623	1	6875623	nonIDM	nonIDM	IDM
S1_6875830	1	6875830	nonIDM	nonIDM	IDM
S1_6875984	1	6875984	nonIDM	nonIDM	nonIDM
S1_6876153	1	6876153	nonIDM	nonIDM	IDM
S1_6876176	1	6876176	nonIDM	nonIDM	nonIDM
S1_6876192	1	6876192	nonIDM	nonIDM	nonIDM
S1_6876365	1	6876365	nonIDM	nonIDM	nonIDM
S1_6881032	1	6881032	nonIDM	nonIDM	nonIDM
S1_6881097	1	6881097	nonIDM	nonIDM	nonIDM
S1_6892934	1	6892934	nonIDM	nonIDM	nonIDM
S1_6892964	1	6892964	nonIDM	IDM	IDM
S1_6893060	1	6893060	nonIDM	nonIDM	nonIDM
S1_6893068	1	6893068	nonIDM	nonIDM	nonIDM
S1_6893073	1	6893073	nonIDM	nonIDM	nonIDM
S1_6893101	1	6893101	nonIDM	nonIDM	nonIDM
S1_6893106	1	6893106	nonIDM	nonIDM	nonIDM
S1_6915023	1	6915023	nonIDM	nonIDM	nonIDM
S1_6915041	1	6915041	nonIDM	nonIDM	nonIDM
S1_6915050	1	6915050	nonIDM	nonIDM	nonIDM
S1_6917901	1	6917901	nonIDM	IDM	nonIDM
S1_6917914	1	6917914	nonIDM	nonIDM	nonIDM
S1_6978791	1	6978791	nonIDM	nonIDM	IDM
S1_6979622	1	6979622	nonIDM	nonIDM	nonIDM
S1_6979661	1	6979661	nonIDM	nonIDM	nonIDM
S1_7019805	1	7019805	nonIDM	nonIDM	nonIDM
S1_7022310	1	7022310	nonIDM	nonIDM	nonIDM
S1_7022321	1	7022321	nonIDM	nonIDM	nonIDM
S1_7022405	1	7022405	IDM	nonIDM	nonIDM
S1_7022428	1	7022428	nonIDM	IDM	nonIDM
S1_7022446	1	7022446	IDM	nonIDM	IDM
S1_7022497	1	7022497	nonIDM	nonIDM	nonIDM
S1_7032363	1	7032363	IDM	nonIDM	nonIDM
S1_7032368	1	7032368	IDM	IDM	nonIDM
S1_7032376	1	7032376	nonIDM	IDM	nonIDM
S1_7034563	1	7034563	nonIDM	nonIDM	nonIDM
S1_7034590	1	7034590	nonIDM	nonIDM	nonIDM
S1_7034650	1	7034650	nonIDM	nonIDM	nonIDM
S1_7034661	1	7034661	nonIDM	nonIDM	nonIDM
S1_7038013	1	7038013	IDM	nonIDM	IDM
S1_7041538	1	7041538	nonIDM	IDM	nonIDM
S1_7041563	1	7041563	nonIDM	nonIDM	nonIDM
S1_7041592	1	7041592	nonIDM	nonIDM	nonIDM
S1_7041907	1	7041907	nonIDM	nonIDM	nonIDM
S1_7041923	1	7041923	nonIDM	nonIDM	IDM
S1_7043651	1	7043651	nonIDM	nonIDM	nonIDM
S1_7047624	1	7047624	nonIDM	nonIDM	nonIDM
S1_7047641	1	7047641	IDM	nonIDM	nonIDM
S1_7047646	1	7047646	IDM	nonIDM	nonIDM
S1_7047669	1	7047669	nonIDM	nonIDM	nonIDM
S1_7047676	1	7047676	IDM	nonIDM	nonIDM
S1_7047771	1	7047771	nonIDM	nonIDM	IDM
S1_7047801	1	7047801	nonIDM	nonIDM	nonIDM
S1_7050386	1	7050386	IDM	nonIDM	nonIDM
S1_7050408	1	7050408	nonIDM	nonIDM	nonIDM
S1_7050462	1	7050462	nonIDM	nonIDM	nonIDM
S1_7050533	1	7050533	nonIDM	nonIDM	IDM
S1_7050582	1	7050582	nonIDM	nonIDM	nonIDM
S1_7096289	1	7096289	IDM	nonIDM	nonIDM
S1_7096312	1	7096312	nonIDM	nonIDM	nonIDM
S1_7096758	1	7096758	nonIDM	nonIDM	nonIDM
S1_7258319	1	7258319	nonIDM	nonIDM	nonIDM
S1_7258355	1	7258355	nonIDM	nonIDM	nonIDM
S1_7303873	1	7303873	IDM	nonIDM	nonIDM
S1_7303989	1	7303989	nonIDM	nonIDM	nonIDM
S1_7307345	1	7307345	nonIDM	nonIDM	nonIDM
S1_7307361	1	7307361	nonIDM	nonIDM	nonIDM
S1_7318053	1	7318053	nonIDM	nonIDM	nonIDM
S1_7318439	1	7318439	nonIDM	nonIDM	IDM
S1_7318444	1	7318444	nonIDM	nonIDM	IDM
S1_7318474	1	7318474	nonIDM	IDM	nonIDM
S1_7344326	1	7344326	nonIDM	nonIDM	nonIDM
S1_7344393	1	7344393	nonIDM	nonIDM	nonIDM
S1_7344420	1	7344420	nonIDM	nonIDM	nonIDM
S1_7344926	1	7344926	nonIDM	nonIDM	nonIDM
S1_7345085	1	7345085	nonIDM	nonIDM	nonIDM
S1_7345092	1	7345092	nonIDM	nonIDM	nonIDM
S1_7345157	1	7345157	nonIDM	nonIDM	nonIDM
S1_7345183	1	7345183	IDM	nonIDM	nonIDM
S1_7345357	1	7345357	IDM	nonIDM	nonIDM
S1_7346342	1	7346342	nonIDM	nonIDM	nonIDM
S1_7346426	1	7346426	nonIDM	nonIDM	nonIDM
S1_7346467	1	7346467	nonIDM	nonIDM	nonIDM
S1_7346476	1	7346476	nonIDM	nonIDM	nonIDM
S1_7438974	1	7438974	nonIDM	nonIDM	nonIDM
S1_7439004	1	7439004	nonIDM	nonIDM	nonIDM
S1_7439154	1	7439154	nonIDM	nonIDM	IDM
S1_7450200	1	7450200	nonIDM	IDM	nonIDM
S1_7450645	1	7450645	IDM	nonIDM	nonIDM
S1_7450857	1	7450857	nonIDM	nonIDM	nonIDM
S1_7451408	1	7451408	nonIDM	nonIDM	IDM
S1_7457832	1	7457832	nonIDM	nonIDM	nonIDM
S1_7457868	1	7457868	nonIDM	nonIDM	nonIDM
S1_7460048	1	7460048	IDM	IDM	nonIDM
S1_7460073	1	7460073	nonIDM	nonIDM	nonIDM
S1_7460093	1	7460093	nonIDM	nonIDM	nonIDM
S1_7461314	1	7461314	nonIDM	nonIDM	nonIDM
S1_7461335	1	7461335	nonIDM	nonIDM	nonIDM
S1_7461353	1	7461353	nonIDM	nonIDM	nonIDM
S1_7461672	1	7461672	nonIDM	nonIDM	nonIDM
S1_7461708	1	7461708	nonIDM	nonIDM	nonIDM
S1_7461974	1	7461974	nonIDM	nonIDM	nonIDM
S1_7462004	1	7462004	nonIDM	nonIDM	nonIDM
S1_7462010	1	7462010	nonIDM	nonIDM	nonIDM
S1_7462070	1	7462070	nonIDM	nonIDM	nonIDM
S1_7462114	1	7462114	nonIDM	nonIDM	nonIDM
S1_7462127	1	7462127	nonIDM	nonIDM	nonIDM
S1_7463457	1	7463457	nonIDM	nonIDM	nonIDM
S1_7463835	1	7463835	nonIDM	IDM	nonIDM
S1_7475620	1	7475620	nonIDM	nonIDM	nonIDM
S1_7475643	1	7475643	nonIDM	nonIDM	nonIDM
S1_7475655	1	7475655	nonIDM	IDM	nonIDM
S1_7475869	1	7475869	nonIDM	nonIDM	nonIDM
S1_7475878	1	7475878	nonIDM	nonIDM	nonIDM
S1_7475895	1	7475895	nonIDM	nonIDM	nonIDM
S1_7475990	1	7475990	nonIDM	nonIDM	nonIDM
S1_7476017	1	7476017	nonIDM	nonIDM	nonIDM
S1_7476153	1	7476153	nonIDM	nonIDM	nonIDM
S1_7476495	1	7476495	nonIDM	IDM	nonIDM
S1_7489544	1	7489544	nonIDM	nonIDM	IDM
S1_7489564	1	7489564	nonIDM	IDM	nonIDM
S1_7489571	1	7489571	nonIDM	nonIDM	nonIDM
S1_7489642	1	7489642	nonIDM	nonIDM	nonIDM
S1_7489755	1	7489755	IDM	nonIDM	nonIDM
S1_7489787	1	7489787	nonIDM	nonIDM	nonIDM
S1_7489801	1	7489801	nonIDM	nonIDM	nonIDM
S1_7489824	1	7489824	nonIDM	nonIDM	nonIDM
S1_7489968	1	7489968	nonIDM	nonIDM	IDM
S1_7489997	1	7489997	nonIDM	nonIDM	nonIDM
S1_7491406	1	7491406	nonIDM	IDM	nonIDM
S1_7626814	1	7626814	nonIDM	nonIDM	nonIDM
S1_7639291	1	7639291	nonIDM	IDM	nonIDM
S1_7706013	1	7706013	nonIDM	nonIDM	nonIDM
S1_7706028	1	7706028	nonIDM	nonIDM	nonIDM
S1_7706062	1	7706062	nonIDM	nonIDM	nonIDM
S1_7706082	1	7706082	nonIDM	IDM	nonIDM
S1_7986380	1	7986380	IDM	nonIDM	nonIDM
S1_8341720	1	8341720	nonIDM	nonIDM	nonIDM
S1_8341735	1	8341735	nonIDM	nonIDM	nonIDM
S1_8440349	1	8440349	nonIDM	IDM	IDM
S1_8644785	1	8644785	nonIDM	nonIDM	nonIDM
S1_8645094	1	8645094	nonIDM	nonIDM	nonIDM
S1_8645353	1	8645353	nonIDM	nonIDM	nonIDM
S1_8764891	1	8764891	nonIDM	IDM	nonIDM
S1_8920394	1	8920394	nonIDM	nonIDM	IDM
S1_8966182	1	8966182	nonIDM	nonIDM	IDM
S1_8966302	1	8966302	nonIDM	nonIDM	nonIDM
S1_8966411	1	8966411	nonIDM	nonIDM	nonIDM
S1_8966656	1	8966656	IDM	nonIDM	nonIDM
S1_9229525	1	9229525	nonIDM	nonIDM	IDM
S1_9334177	1	9334177	nonIDM	nonIDM	nonIDM
S1_9334205	1	9334205	nonIDM	nonIDM	nonIDM
S1_9336331	1	9336331	nonIDM	nonIDM	nonIDM
S1_9336476	1	9336476	nonIDM	nonIDM	nonIDM
S1_9359474	1	9359474	nonIDM	nonIDM	nonIDM
S1_9403022	1	9403022	nonIDM	nonIDM	nonIDM
S1_9403423	1	9403423	nonIDM	nonIDM	nonIDM
S1_9416548	1	9416548	nonIDM	IDM	nonIDM
S1_9416611	1	9416611	nonIDM	nonIDM	nonIDM
S1_9593865	1	9593865	nonIDM	nonIDM	IDM
S1_9593886	1	9593886	nonIDM	nonIDM	nonIDM
S1_9647509	1	9647509	IDM	nonIDM	nonIDM
S1_9747959	1	9747959	nonIDM	nonIDM	nonIDM
S1_9747980	1	9747980	nonIDM	IDM	nonIDM
S1_9748004	1	9748004	nonIDM	nonIDM	nonIDM
S1_9748009	1	9748009	nonIDM	nonIDM	IDM
S1_9748109	1	9748109	nonIDM	nonIDM	nonIDM
S1_9748138	1	9748138	nonIDM	nonIDM	nonIDM
S1_9748146	1	9748146	nonIDM	nonIDM	nonIDM
S1_9748155	1	9748155	nonIDM	nonIDM	nonIDM
S1_9748195	1	9748195	nonIDM	IDM	IDM
S1_9748317	1	9748317	IDM	nonIDM	IDM
S1_9748344	1	9748344	nonIDM	nonIDM	nonIDM
S1_9748403	1	9748403	nonIDM	nonIDM	nonIDM
S1_9748439	1	9748439	nonIDM	nonIDM	nonIDM
S1_9750827	1	9750827	IDM	nonIDM	nonIDM
S1_9750853	1	9750853	nonIDM	nonIDM	nonIDM
S1_9751060	1	9751060	nonIDM	nonIDM	nonIDM
S1_9751071	1	9751071	IDM	nonIDM	nonIDM
S1_9751077	1	9751077	nonIDM	IDM	nonIDM
S1_9764569	1	9764569	nonIDM	nonIDM	nonIDM
S1_9764585	1	9764585	nonIDM	nonIDM	nonIDM
S1_9764607	1	9764607	IDM	IDM	nonIDM
S1_9764618	1	9764618	nonIDM	nonIDM	IDM
S1_9764639	1	9764639	nonIDM	nonIDM	nonIDM
S1_9764697	1	9764697	nonIDM	IDM	nonIDM
S1_9764840	1	9764840	nonIDM	nonIDM	nonIDM
S1_9764877	1	9764877	IDM	nonIDM	nonIDM
S1_9764891	1	9764891	nonIDM	nonIDM	nonIDM
S1_10147307	1	10147307	nonIDM	IDM	nonIDM
S1_10147312	1	10147312	nonIDM	nonIDM	nonIDM
S1_10147324	1	10147324	nonIDM	IDM	nonIDM
S1_10147358	1	10147358	nonIDM	nonIDM	nonIDM
S1_10147446	1	10147446	nonIDM	IDM	nonIDM
S1_10189278	1	10189278	nonIDM	nonIDM	nonIDM
S1_10530158	1	10530158	nonIDM	nonIDM	nonIDM
S1_10547093	1	10547093	nonIDM	nonIDM	nonIDM
S1_10547100	1	10547100	nonIDM	nonIDM	nonIDM
S1_10757645	1	10757645	nonIDM	nonIDM	IDM
S1_10851242	1	10851242	nonIDM	nonIDM	IDM
S1_10851335	1	10851335	nonIDM	nonIDM	nonIDM
S1_10851352	1	10851352	IDM	IDM	nonIDM
S1_10851395	1	10851395	nonIDM	IDM	IDM
S1_10851401	1	10851401	nonIDM	nonIDM	nonIDM
S1_10851615	1	10851615	nonIDM	nonIDM	nonIDM
S1_10852009	1	10852009	nonIDM	nonIDM	IDM
S1_10852036	1	10852036	IDM	nonIDM	nonIDM
S1_10853280	1	10853280	nonIDM	IDM	nonIDM
S1_10853319	1	10853319	nonIDM	IDM	nonIDM
S1_10853342	1	10853342	nonIDM	nonIDM	IDM
S1_10853486	1	10853486	nonIDM	nonIDM	nonIDM
S1_10853502	1	10853502	nonIDM	nonIDM	nonIDM
S1_10853520	1	10853520	nonIDM	nonIDM	nonIDM
S1_10943474	1	10943474	nonIDM	nonIDM	nonIDM
S1_10943486	1	10943486	nonIDM	nonIDM	nonIDM
S1_10943597	1	10943597	nonIDM	nonIDM	nonIDM
S1_10943617	1	10943617	nonIDM	nonIDM	nonIDM
S1_10984607	1	10984607	nonIDM	nonIDM	nonIDM
S1_11156634	1	11156634	nonIDM	nonIDM	nonIDM
S1_11246707	1	11246707	IDM	nonIDM	nonIDM
S1_11246886	1	11246886	IDM	nonIDM	nonIDM
S1_11467161	1	11467161	nonIDM	nonIDM	nonIDM
S1_11467527	1	11467527	nonIDM	nonIDM	nonIDM
S1_11468011	1	11468011	nonIDM	nonIDM	nonIDM
S1_11470730	1	11470730	nonIDM	nonIDM	nonIDM
S1_11470773	1	11470773	nonIDM	IDM	nonIDM
S1_11470803	1	11470803	nonIDM	nonIDM	nonIDM
S1_11473182	1	11473182	nonIDM	nonIDM	nonIDM
S1_11473288	1	11473288	nonIDM	nonIDM	nonIDM
S1_11473294	1	11473294	nonIDM	nonIDM	nonIDM
S1_11574674	1	11574674	IDM	nonIDM	nonIDM
S1_11574681	1	11574681	nonIDM	nonIDM	nonIDM
S1_11574696	1	11574696	IDM	IDM	nonIDM
S1_11574719	1	11574719	nonIDM	nonIDM	IDM
S1_11574983	1	11574983	nonIDM	nonIDM	nonIDM
S1_11614567	1	11614567	nonIDM	IDM	nonIDM
S1_11614599	1	11614599	nonIDM	nonIDM	IDM
S1_11614619	1	11614619	nonIDM	nonIDM	nonIDM
S1_11614626	1	11614626	nonIDM	IDM	nonIDM
S1_11614647	1	11614647	nonIDM	nonIDM	nonIDM
S1_11614690	1	11614690	nonIDM	nonIDM	nonIDM
S1_11614696	1	11614696	nonIDM	nonIDM	nonIDM
S1_11614706	1	11614706	nonIDM	nonIDM	nonIDM
S1_11614711	1	11614711	nonIDM	IDM	nonIDM
S1_11614718	1	11614718	IDM	nonIDM	nonIDM
S1_11614725	1	11614725	nonIDM	nonIDM	nonIDM
S1_11614752	1	11614752	nonIDM	nonIDM	nonIDM
S1_11614757	1	11614757	nonIDM	nonIDM	nonIDM
S1_11614763	1	11614763	nonIDM	IDM	nonIDM
S1_11756342	1	11756342	IDM	nonIDM	nonIDM
S1_11763800	1	11763800	nonIDM	IDM	nonIDM
S1_11766992	1	11766992	nonIDM	IDM	nonIDM
S1_11767730	1	11767730	nonIDM	nonIDM	nonIDM
S1_11771911	1	11771911	nonIDM	nonIDM	nonIDM
S1_11772302	1	11772302	nonIDM	nonIDM	nonIDM
S1_11772309	1	11772309	nonIDM	nonIDM	nonIDM
S1_11772380	1	11772380	nonIDM	nonIDM	IDM
S1_11774314	1	11774314	IDM	nonIDM	nonIDM
S1_11793754	1	11793754	nonIDM	nonIDM	nonIDM
S1_11793772	1	11793772	nonIDM	IDM	nonIDM
S1_11793797	1	11793797	nonIDM	nonIDM	nonIDM
S1_11793833	1	11793833	IDM	nonIDM	nonIDM
S1_11794344	1	11794344	nonIDM	nonIDM	nonIDM
S1_11794379	1	11794379	nonIDM	nonIDM	nonIDM
S1_11838933	1	11838933	nonIDM	nonIDM	nonIDM
S1_11839877	1	11839877	nonIDM	IDM	nonIDM
S1_12250727	1	12250727	nonIDM	nonIDM	nonIDM
S1_12250732	1	12250732	nonIDM	nonIDM	nonIDM
S1_12250837	1	12250837	nonIDM	IDM	nonIDM
S1_12255868	1	12255868	nonIDM	nonIDM	nonIDM
S1_12545133	1	12545133	nonIDM	nonIDM	nonIDM
S1_12545206	1	12545206	nonIDM	nonIDM	nonIDM
S1_12569956	1	12569956	nonIDM	nonIDM	nonIDM
S1_12569964	1	12569964	nonIDM	nonIDM	nonIDM
S1_12569980	1	12569980	nonIDM	nonIDM	nonIDM
S1_12570151	1	12570151	nonIDM	nonIDM	nonIDM
S1_12729462	1	12729462	nonIDM	nonIDM	nonIDM
S1_12729472	1	12729472	IDM	nonIDM	nonIDM
S1_12729477	1	12729477	nonIDM	nonIDM	nonIDM
S1_12919168	1	12919168	IDM	nonIDM	nonIDM
S1_12919177	1	12919177	nonIDM	nonIDM	nonIDM
S1_12919185	1	12919185	nonIDM	IDM	IDM
S1_13124885	1	13124885	IDM	nonIDM	nonIDM
S1_13141932	1	13141932	IDM	IDM	nonIDM
S1_13142271	1	13142271	nonIDM	nonIDM	nonIDM
S1_13146297	1	13146297	nonIDM	nonIDM	nonIDM
S1_13272482	1	13272482	nonIDM	IDM	nonIDM
S1_13292438	1	13292438	nonIDM	nonIDM	nonIDM
S1_13292453	1	13292453	nonIDM	nonIDM	nonIDM
S1_13292517	1	13292517	nonIDM	nonIDM	nonIDM
S1_13325389	1	13325389	nonIDM	nonIDM	nonIDM
S1_13417224	1	13417224	nonIDM	nonIDM	nonIDM
S1_13417237	1	13417237	nonIDM	nonIDM	nonIDM
S1_13418927	1	13418927	nonIDM	nonIDM	nonIDM
S1_13604651	1	13604651	nonIDM	IDM	nonIDM
S1_13604669	1	13604669	nonIDM	nonIDM	IDM
S1_13604696	1	13604696	nonIDM	nonIDM	nonIDM
S1_13604734	1	13604734	IDM	IDM	nonIDM
S1_13667833	1	13667833	nonIDM	nonIDM	nonIDM
S1_13668117	1	13668117	nonIDM	nonIDM	nonIDM
S1_13668188	1	13668188	nonIDM	nonIDM	nonIDM
S1_13668284	1	13668284	nonIDM	nonIDM	nonIDM
S1_13668302	1	13668302	nonIDM	nonIDM	nonIDM
S1_13668325	1	13668325	nonIDM	nonIDM	nonIDM
S1_13668354	1	13668354	nonIDM	nonIDM	nonIDM
S1_13670229	1	13670229	nonIDM	nonIDM	nonIDM
S1_13676738	1	13676738	nonIDM	IDM	nonIDM
S1_13676749	1	13676749	nonIDM	nonIDM	IDM
S1_13715008	1	13715008	nonIDM	nonIDM	nonIDM
S1_13913182	1	13913182	nonIDM	nonIDM	nonIDM
S1_13913229	1	13913229	nonIDM	nonIDM	IDM
S1_13922493	1	13922493	nonIDM	IDM	nonIDM
S1_13922518	1	13922518	nonIDM	nonIDM	IDM
S1_13922534	1	13922534	nonIDM	nonIDM	nonIDM
S1_13922541	1	13922541	IDM	nonIDM	IDM
S1_14061123	1	14061123	nonIDM	nonIDM	nonIDM
S1_14399015	1	14399015	nonIDM	nonIDM	nonIDM
S1_14407779	1	14407779	nonIDM	nonIDM	nonIDM
S1_14407792	1	14407792	nonIDM	nonIDM	nonIDM
S1_14407817	1	14407817	IDM	nonIDM	nonIDM
S1_14407833	1	14407833	nonIDM	nonIDM	IDM
S1_14407841	1	14407841	nonIDM	nonIDM	IDM
S1_14495987	1	14495987	nonIDM	nonIDM	nonIDM
S1_14499178	1	14499178	nonIDM	IDM	nonIDM
S1_14600690	1	14600690	nonIDM	nonIDM	IDM
S1_14600702	1	14600702	nonIDM	nonIDM	nonIDM
S1_14603415	1	14603415	nonIDM	nonIDM	nonIDM
S1_14605934	1	14605934	nonIDM	nonIDM	nonIDM
S1_14756185	1	14756185	nonIDM	IDM	nonIDM
S1_14815180	1	14815180	nonIDM	nonIDM	nonIDM
S1_14815186	1	14815186	nonIDM	nonIDM	nonIDM
S1_14815374	1	14815374	nonIDM	nonIDM	nonIDM
S1_14815496	1	14815496	IDM	nonIDM	nonIDM
S1_14815505	1	14815505	nonIDM	nonIDM	IDM
S1_14815520	1	14815520	nonIDM	nonIDM	nonIDM
S1_14815808	1	14815808	IDM	nonIDM	IDM
S1_14869967	1	14869967	nonIDM	nonIDM	IDM
S1_14871365	1	14871365	nonIDM	nonIDM	nonIDM
S1_15073043	1	15073043	nonIDM	nonIDM	nonIDM
S1_15073062	1	15073062	nonIDM	nonIDM	IDM
S1_15073273	1	15073273	IDM	nonIDM	nonIDM
S1_15073287	1	15073287	IDM	nonIDM	nonIDM
S1_15073312	1	15073312	IDM	nonIDM	nonIDM
S1_15073333	1	15073333	nonIDM	nonIDM	nonIDM
S1_15095158	1	15095158	nonIDM	nonIDM	IDM
S1_15095361	1	15095361	nonIDM	nonIDM	IDM
S1_15096543	1	15096543	nonIDM	nonIDM	nonIDM
S1_15159986	1	15159986	nonIDM	nonIDM	IDM
S1_15234263	1	15234263	IDM	IDM	nonIDM
S1_15440817	1	15440817	nonIDM	nonIDM	nonIDM
S1_15474304	1	15474304	nonIDM	IDM	nonIDM
S1_15474346	1	15474346	IDM	nonIDM	nonIDM
S1_15474378	1	15474378	IDM	nonIDM	nonIDM
S1_15618312	1	15618312	nonIDM	nonIDM	nonIDM
S1_15623398	1	15623398	nonIDM	nonIDM	IDM
S1_15623638	1	15623638	nonIDM	nonIDM	nonIDM
S1_15630973	1	15630973	nonIDM	nonIDM	nonIDM
S1_15748773	1	15748773	nonIDM	nonIDM	nonIDM
S1_15750107	1	15750107	nonIDM	IDM	nonIDM
S1_15756540	1	15756540	IDM	nonIDM	nonIDM
S1_15886887	1	15886887	nonIDM	nonIDM	nonIDM
S1_16044597	1	16044597	nonIDM	IDM	IDM
S1_16335841	1	16335841	nonIDM	nonIDM	nonIDM
S1_16335852	1	16335852	IDM	nonIDM	nonIDM
S1_16335872	1	16335872	nonIDM	nonIDM	nonIDM
S1_16367414	1	16367414	nonIDM	nonIDM	nonIDM
S1_16367430	1	16367430	nonIDM	nonIDM	nonIDM
S1_16367443	1	16367443	nonIDM	nonIDM	IDM
S1_16490785	1	16490785	IDM	IDM	nonIDM
S1_16520778	1	16520778	nonIDM	nonIDM	nonIDM
S1_16520852	1	16520852	nonIDM	nonIDM	nonIDM
S1_16520882	1	16520882	IDM	nonIDM	nonIDM
S1_16520914	1	16520914	nonIDM	nonIDM	IDM
S1_16520947	1	16520947	nonIDM	nonIDM	IDM
S1_16520958	1	16520958	IDM	nonIDM	nonIDM
S1_16781581	1	16781581	nonIDM	nonIDM	nonIDM
S1_16783878	1	16783878	IDM	IDM	nonIDM
S1_16783934	1	16783934	nonIDM	nonIDM	nonIDM
S1_16783955	1	16783955	IDM	nonIDM	nonIDM
S1_16783974	1	16783974	nonIDM	nonIDM	nonIDM
S1_16833603	1	16833603	nonIDM	nonIDM	nonIDM
S1_16891206	1	16891206	nonIDM	nonIDM	nonIDM
S1_16918245	1	16918245	nonIDM	nonIDM	nonIDM
S1_16918293	1	16918293	nonIDM	nonIDM	nonIDM
S1_16922476	1	16922476	nonIDM	nonIDM	nonIDM
S1_16943170	1	16943170	nonIDM	nonIDM	nonIDM
S1_16943176	1	16943176	IDM	nonIDM	nonIDM
S1_16943181	1	16943181	nonIDM	nonIDM	IDM
S1_16945369	1	16945369	nonIDM	nonIDM	nonIDM
S1_16984199	1	16984199	nonIDM	nonIDM	nonIDM
S1_16990783	1	16990783	nonIDM	IDM	nonIDM
S1_16996212	1	16996212	nonIDM	nonIDM	nonIDM
S1_16996236	1	16996236	nonIDM	nonIDM	nonIDM
S1_16996248	1	16996248	nonIDM	IDM	nonIDM
S1_16997116	1	16997116	nonIDM	nonIDM	nonIDM
S1_16997129	1	16997129	nonIDM	nonIDM	nonIDM
S1_16997213	1	16997213	IDM	nonIDM	nonIDM
S1_16997543	1	16997543	nonIDM	nonIDM	IDM
S1_17015136	1	17015136	nonIDM	nonIDM	nonIDM
S1_17015223	1	17015223	nonIDM	nonIDM	nonIDM
S1_17045603	1	17045603	IDM	nonIDM	nonIDM
S1_17045621	1	17045621	nonIDM	nonIDM	nonIDM
S1_17045684	1	17045684	nonIDM	nonIDM	nonIDM
S1_17045810	1	17045810	IDM	nonIDM	nonIDM
S1_17045843	1	17045843	nonIDM	nonIDM	nonIDM
S1_17050373	1	17050373	nonIDM	nonIDM	nonIDM
S1_17051648	1	17051648	nonIDM	nonIDM	nonIDM
S1_17051895	1	17051895	nonIDM	nonIDM	nonIDM
S1_17127492	1	17127492	nonIDM	nonIDM	nonIDM
S1_17137854	1	17137854	nonIDM	nonIDM	nonIDM
S1_17137867	1	17137867	nonIDM	nonIDM	IDM
S1_17138394	1	17138394	nonIDM	nonIDM	nonIDM
S1_17193170	1	17193170	nonIDM	nonIDM	nonIDM
S1_17196220	1	17196220	nonIDM	nonIDM	nonIDM
S1_17198882	1	17198882	nonIDM	nonIDM	nonIDM
S1_17198906	1	17198906	IDM	nonIDM	nonIDM
S1_17198925	1	17198925	nonIDM	nonIDM	nonIDM
S1_17198938	1	17198938	IDM	nonIDM	nonIDM
S1_17266524	1	17266524	nonIDM	nonIDM	nonIDM
S1_17266534	1	17266534	nonIDM	nonIDM	IDM
S1_17266548	1	17266548	IDM	nonIDM	IDM
S1_17266693	1	17266693	nonIDM	nonIDM	nonIDM
S1_17266708	1	17266708	nonIDM	nonIDM	nonIDM
S1_17266720	1	17266720	IDM	nonIDM	nonIDM
S1_17266745	1	17266745	nonIDM	nonIDM	nonIDM
S1_17288790	1	17288790	nonIDM	nonIDM	nonIDM
S1_17333588	1	17333588	nonIDM	nonIDM	nonIDM
S1_17333662	1	17333662	nonIDM	IDM	nonIDM
S1_17408833	1	17408833	nonIDM	nonIDM	nonIDM
S1_17408936	1	17408936	nonIDM	nonIDM	nonIDM
S1_17408962	1	17408962	nonIDM	nonIDM	nonIDM
S1_17408976	1	17408976	nonIDM	nonIDM	nonIDM
S1_17408983	1	17408983	nonIDM	nonIDM	nonIDM
S1_17480254	1	17480254	nonIDM	nonIDM	nonIDM
S1_17480479	1	17480479	nonIDM	IDM	nonIDM
S1_17482176	1	17482176	nonIDM	nonIDM	nonIDM
S1_17482368	1	17482368	nonIDM	nonIDM	IDM
S1_17482387	1	17482387	nonIDM	nonIDM	nonIDM
S1_17505717	1	17505717	nonIDM	nonIDM	nonIDM
S1_17507020	1	17507020	nonIDM	nonIDM	nonIDM
S1_17507046	1	17507046	nonIDM	nonIDM	IDM
S1_17508558	1	17508558	nonIDM	nonIDM	nonIDM
S1_17537219	1	17537219	nonIDM	IDM	nonIDM
S1_17537254	1	17537254	nonIDM	nonIDM	nonIDM
S1_17537295	1	17537295	IDM	nonIDM	IDM
S1_17538434	1	17538434	nonIDM	nonIDM	nonIDM
S1_17601262	1	17601262	nonIDM	nonIDM	nonIDM
S1_17601274	1	17601274	nonIDM	nonIDM	IDM
S1_17601286	1	17601286	nonIDM	nonIDM	nonIDM
S1_17601300	1	17601300	IDM	nonIDM	nonIDM
S1_17601314	1	17601314	nonIDM	nonIDM	nonIDM
S1_17601339	1	17601339	nonIDM	nonIDM	nonIDM
S1_17670115	1	17670115	IDM	nonIDM	nonIDM
S1_17670143	1	17670143	nonIDM	nonIDM	nonIDM
S1_17709379	1	17709379	nonIDM	IDM	nonIDM
S1_17709394	1	17709394	nonIDM	nonIDM	nonIDM
S1_17830376	1	17830376	nonIDM	nonIDM	nonIDM
S1_17830417	1	17830417	nonIDM	nonIDM	nonIDM
S1_17832312	1	17832312	IDM	nonIDM	nonIDM
S1_17844533	1	17844533	nonIDM	nonIDM	IDM
S1_17844718	1	17844718	nonIDM	nonIDM	nonIDM
S1_17845458	1	17845458	nonIDM	IDM	nonIDM
S1_17845474	1	17845474	IDM	nonIDM	IDM
S1_17857604	1	17857604	nonIDM	nonIDM	IDM
S1_17857615	1	17857615	nonIDM	nonIDM	nonIDM
S1_17858646	1	17858646	IDM	nonIDM	nonIDM
S1_17858895	1	17858895	IDM	nonIDM	nonIDM
S1_17858912	1	17858912	nonIDM	IDM	nonIDM
S1_17883232	1	17883232	nonIDM	IDM	nonIDM
S1_17902883	1	17902883	nonIDM	IDM	nonIDM
S1_17902926	1	17902926	nonIDM	nonIDM	nonIDM
S1_17902994	1	17902994	nonIDM	nonIDM	nonIDM
S1_17925362	1	17925362	nonIDM	nonIDM	nonIDM
S1_17996590	1	17996590	nonIDM	nonIDM	nonIDM
S1_18023555	1	18023555	nonIDM	nonIDM	nonIDM
S1_18023560	1	18023560	nonIDM	nonIDM	nonIDM
S1_18023596	1	18023596	nonIDM	nonIDM	nonIDM
S1_18035865	1	18035865	nonIDM	nonIDM	nonIDM
S1_18035926	1	18035926	nonIDM	nonIDM	nonIDM
S1_18035967	1	18035967	nonIDM	nonIDM	nonIDM
S1_18040505	1	18040505	nonIDM	nonIDM	nonIDM
S1_18056957	1	18056957	IDM	nonIDM	IDM
S1_18056987	1	18056987	nonIDM	IDM	nonIDM
S1_18076895	1	18076895	nonIDM	nonIDM	nonIDM
S1_18076953	1	18076953	nonIDM	nonIDM	nonIDM
S1_18076967	1	18076967	nonIDM	nonIDM	nonIDM
S1_18079422	1	18079422	nonIDM	nonIDM	nonIDM
S1_18079576	1	18079576	IDM	nonIDM	nonIDM
S1_18099133	1	18099133	nonIDM	IDM	nonIDM
S1_18115937	1	18115937	nonIDM	nonIDM	nonIDM
S1_18120004	1	18120004	IDM	IDM	nonIDM
S1_18120566	1	18120566	nonIDM	nonIDM	nonIDM
S1_18120589	1	18120589	nonIDM	nonIDM	nonIDM
S1_18120600	1	18120600	nonIDM	nonIDM	nonIDM
S1_18128470	1	18128470	nonIDM	nonIDM	nonIDM
S1_18128487	1	18128487	nonIDM	IDM	nonIDM
S1_18128503	1	18128503	IDM	nonIDM	nonIDM
S1_18190894	1	18190894	nonIDM	nonIDM	IDM
S1_18191451	1	18191451	nonIDM	nonIDM	nonIDM
S1_18224597	1	18224597	nonIDM	IDM	IDM
S1_18227935	1	18227935	nonIDM	nonIDM	nonIDM
S1_18227948	1	18227948	nonIDM	IDM	nonIDM
S1_18228388	1	18228388	nonIDM	nonIDM	nonIDM
S1_18265193	1	18265193	nonIDM	nonIDM	nonIDM
S1_18265546	1	18265546	nonIDM	IDM	nonIDM
S1_18265564	1	18265564	nonIDM	nonIDM	nonIDM
S1_18265607	1	18265607	IDM	nonIDM	nonIDM
S1_18266959	1	18266959	nonIDM	nonIDM	nonIDM
S1_18287922	1	18287922	nonIDM	nonIDM	nonIDM
S1_18288059	1	18288059	IDM	nonIDM	nonIDM
S1_18289487	1	18289487	nonIDM	nonIDM	nonIDM
S1_18289518	1	18289518	nonIDM	nonIDM	nonIDM
S1_18290376	1	18290376	nonIDM	nonIDM	nonIDM
S1_18290406	1	18290406	nonIDM	nonIDM	IDM
S1_18327355	1	18327355	nonIDM	nonIDM	nonIDM
S1_18350218	1	18350218	nonIDM	nonIDM	nonIDM
S1_18355165	1	18355165	nonIDM	nonIDM	nonIDM
S1_18355172	1	18355172	nonIDM	nonIDM	nonIDM
S1_18355424	1	18355424	nonIDM	nonIDM	nonIDM
S1_18355471	1	18355471	nonIDM	nonIDM	nonIDM
S1_18363275	1	18363275	nonIDM	nonIDM	nonIDM
S1_18363345	1	18363345	nonIDM	nonIDM	nonIDM
S1_18363369	1	18363369	nonIDM	nonIDM	nonIDM
S1_18379325	1	18379325	nonIDM	nonIDM	nonIDM
S1_18379343	1	18379343	nonIDM	nonIDM	nonIDM
S1_18385981	1	18385981	nonIDM	nonIDM	nonIDM
S1_18390419	1	18390419	nonIDM	nonIDM	IDM
S1_18434357	1	18434357	nonIDM	nonIDM	nonIDM
S1_18434374	1	18434374	nonIDM	nonIDM	nonIDM
S1_18434396	1	18434396	nonIDM	nonIDM	nonIDM
S1_18517058	1	18517058	nonIDM	nonIDM	nonIDM
S1_18517191	1	18517191	nonIDM	nonIDM	nonIDM
S1_18548184	1	18548184	nonIDM	nonIDM	nonIDM
S1_18548192	1	18548192	nonIDM	nonIDM	nonIDM
S1_18548197	1	18548197	nonIDM	nonIDM	IDM
S1_18572445	1	18572445	nonIDM	nonIDM	nonIDM
S1_18572475	1	18572475	nonIDM	nonIDM	nonIDM
S1_18572487	1	18572487	nonIDM	nonIDM	nonIDM
S1_18572538	1	18572538	nonIDM	nonIDM	nonIDM
S1_18572865	1	18572865	nonIDM	nonIDM	nonIDM
S1_18586458	1	18586458	nonIDM	nonIDM	nonIDM
S1_18588407	1	18588407	nonIDM	nonIDM	nonIDM
S1_18588414	1	18588414	nonIDM	IDM	nonIDM
S1_18601155	1	18601155	nonIDM	nonIDM	nonIDM
S1_18609292	1	18609292	nonIDM	nonIDM	nonIDM
S1_18624601	1	18624601	nonIDM	IDM	nonIDM
S1_18624631	1	18624631	IDM	nonIDM	nonIDM
S1_18633458	1	18633458	nonIDM	nonIDM	IDM
S1_18633540	1	18633540	nonIDM	nonIDM	nonIDM
S1_18633561	1	18633561	nonIDM	nonIDM	nonIDM
S1_18633627	1	18633627	nonIDM	IDM	IDM
S1_18633676	1	18633676	nonIDM	nonIDM	nonIDM
S1_18639644	1	18639644	nonIDM	IDM	nonIDM
S1_18639659	1	18639659	nonIDM	nonIDM	IDM
S1_18639800	1	18639800	IDM	nonIDM	IDM
S1_18639829	1	18639829	IDM	nonIDM	nonIDM
S1_18639889	1	18639889	nonIDM	nonIDM	nonIDM
S1_18639899	1	18639899	nonIDM	nonIDM	nonIDM
S1_18639930	1	18639930	nonIDM	nonIDM	IDM
S1_18640097	1	18640097	nonIDM	nonIDM	nonIDM
S1_18640485	1	18640485	nonIDM	nonIDM	nonIDM
S1_18642382	1	18642382	nonIDM	nonIDM	IDM
S1_18642387	1	18642387	nonIDM	IDM	IDM
S1_18642418	1	18642418	nonIDM	nonIDM	nonIDM
S1_18642505	1	18642505	nonIDM	nonIDM	nonIDM
S1_18642531	1	18642531	nonIDM	nonIDM	nonIDM
S1_18645374	1	18645374	IDM	nonIDM	nonIDM
S1_18646159	1	18646159	nonIDM	nonIDM	nonIDM
S1_18646196	1	18646196	nonIDM	nonIDM	IDM
S1_18648263	1	18648263	nonIDM	nonIDM	nonIDM
S1_18648300	1	18648300	nonIDM	nonIDM	nonIDM
S1_18661527	1	18661527	nonIDM	IDM	nonIDM
S1_18661545	1	18661545	IDM	nonIDM	nonIDM
S1_18679444	1	18679444	nonIDM	nonIDM	nonIDM
S1_18679577	1	18679577	nonIDM	nonIDM	nonIDM
S1_18679583	1	18679583	nonIDM	nonIDM	IDM
S1_18679607	1	18679607	IDM	nonIDM	nonIDM
S1_18687386	1	18687386	nonIDM	IDM	IDM
S1_18693854	1	18693854	nonIDM	nonIDM	nonIDM
S1_18717883	1	18717883	nonIDM	nonIDM	nonIDM
S1_18717900	1	18717900	nonIDM	nonIDM	nonIDM
S1_18835798	1	18835798	IDM	nonIDM	nonIDM
S1_18836029	1	18836029	nonIDM	nonIDM	nonIDM
S1_18837021	1	18837021	IDM	nonIDM	nonIDM
S1_18837026	1	18837026	nonIDM	nonIDM	nonIDM
S1_18843337	1	18843337	nonIDM	nonIDM	nonIDM
S1_18843352	1	18843352	IDM	nonIDM	nonIDM
S1_18843370	1	18843370	nonIDM	nonIDM	nonIDM
S1_18844819	1	18844819	IDM	IDM	nonIDM
S1_18859504	1	18859504	nonIDM	nonIDM	nonIDM
S1_18859858	1	18859858	nonIDM	nonIDM	nonIDM
S1_18859904	1	18859904	nonIDM	nonIDM	nonIDM
S1_18859943	1	18859943	nonIDM	nonIDM	nonIDM
S1_18864554	1	18864554	nonIDM	nonIDM	nonIDM
S1_18864578	1	18864578	nonIDM	nonIDM	nonIDM
S1_18884987	1	18884987	nonIDM	IDM	IDM
S1_18886107	1	18886107	nonIDM	nonIDM	nonIDM
S1_18898124	1	18898124	IDM	nonIDM	nonIDM
S1_18898169	1	18898169	nonIDM	nonIDM	IDM
S1_18920782	1	18920782	nonIDM	nonIDM	nonIDM
S1_18920813	1	18920813	nonIDM	nonIDM	nonIDM
S1_18920838	1	18920838	nonIDM	nonIDM	nonIDM
S1_18920911	1	18920911	nonIDM	nonIDM	nonIDM
S1_18921417	1	18921417	IDM	IDM	nonIDM
S1_18921425	1	18921425	nonIDM	nonIDM	nonIDM
S1_18924525	1	18924525	nonIDM	nonIDM	nonIDM
S1_18924531	1	18924531	nonIDM	nonIDM	nonIDM
S1_18924578	1	18924578	nonIDM	nonIDM	nonIDM
S1_18926601	1	18926601	nonIDM	nonIDM	nonIDM
S1_18926856	1	18926856	nonIDM	nonIDM	nonIDM
S1_18938496	1	18938496	nonIDM	nonIDM	nonIDM
S1_18964609	1	18964609	nonIDM	nonIDM	nonIDM
S1_18964615	1	18964615	nonIDM	nonIDM	nonIDM
S1_18965354	1	18965354	nonIDM	IDM	nonIDM
S1_18966460	1	18966460	IDM	nonIDM	nonIDM
S1_18979061	1	18979061	nonIDM	nonIDM	nonIDM
S1_19014527	1	19014527	nonIDM	nonIDM	nonIDM
S1_19014886	1	19014886	nonIDM	nonIDM	nonIDM
S1_19015415	1	19015415	nonIDM	nonIDM	nonIDM
S1_19015457	1	19015457	nonIDM	nonIDM	nonIDM
S1_19016084	1	19016084	nonIDM	nonIDM	IDM
S1_19027191	1	19027191	nonIDM	nonIDM	nonIDM
S1_19027254	1	19027254	nonIDM	nonIDM	nonIDM
S1_19033671	1	19033671	nonIDM	nonIDM	nonIDM
S1_19033688	1	19033688	nonIDM	nonIDM	IDM
S1_19033716	1	19033716	nonIDM	nonIDM	nonIDM
S1_19079737	1	19079737	nonIDM	IDM	nonIDM
S1_19104390	1	19104390	IDM	IDM	nonIDM
S1_19104399	1	19104399	IDM	nonIDM	nonIDM
S1_19104614	1	19104614	nonIDM	nonIDM	nonIDM
S1_19123848	1	19123848	nonIDM	nonIDM	nonIDM
S1_19123863	1	19123863	IDM	IDM	nonIDM
S1_19123874	1	19123874	nonIDM	nonIDM	nonIDM
S1_19126406	1	19126406	nonIDM	nonIDM	nonIDM
S1_19139295	1	19139295	nonIDM	nonIDM	nonIDM
S1_19139376	1	19139376	IDM	nonIDM	nonIDM
S1_19150581	1	19150581	nonIDM	nonIDM	nonIDM
S1_19150677	1	19150677	nonIDM	nonIDM	nonIDM
S1_19152055	1	19152055	nonIDM	IDM	IDM
S1_19152908	1	19152908	nonIDM	nonIDM	nonIDM
S1_19153612	1	19153612	nonIDM	nonIDM	nonIDM
S1_19177197	1	19177197	IDM	nonIDM	IDM
S1_19177224	1	19177224	nonIDM	nonIDM	nonIDM
S1_19177317	1	19177317	IDM	IDM	nonIDM
S1_19209981	1	19209981	nonIDM	nonIDM	nonIDM
S1_19210054	1	19210054	nonIDM	IDM	IDM
S1_19210088	1	19210088	nonIDM	nonIDM	nonIDM
S1_19210099	1	19210099	nonIDM	IDM	nonIDM
S1_19210105	1	19210105	nonIDM	nonIDM	nonIDM
S1_19239498	1	19239498	nonIDM	nonIDM	nonIDM
S1_19253730	1	19253730	nonIDM	nonIDM	nonIDM
S1_19254157	1	19254157	IDM	nonIDM	nonIDM
S1_19334975	1	19334975	nonIDM	nonIDM	IDM
S1_19335255	1	19335255	nonIDM	nonIDM	IDM
S1_19335588	1	19335588	IDM	nonIDM	nonIDM
S1_19336486	1	19336486	nonIDM	nonIDM	nonIDM
S1_19336495	1	19336495	nonIDM	nonIDM	nonIDM
S1_19352417	1	19352417	nonIDM	nonIDM	nonIDM
S1_19352427	1	19352427	nonIDM	nonIDM	nonIDM
S1_19352499	1	19352499	nonIDM	nonIDM	nonIDM
S1_19352542	1	19352542	nonIDM	IDM	nonIDM
S1_19359275	1	19359275	nonIDM	nonIDM	nonIDM
S1_19372990	1	19372990	nonIDM	IDM	nonIDM
S1_19372998	1	19372998	nonIDM	nonIDM	nonIDM
S1_19373008	1	19373008	nonIDM	nonIDM	nonIDM
S1_19373081	1	19373081	nonIDM	nonIDM	nonIDM
S1_19373357	1	19373357	nonIDM	nonIDM	IDM
S1_19373377	1	19373377	nonIDM	nonIDM	nonIDM
S1_19373389	1	19373389	IDM	nonIDM	nonIDM
S1_19374156	1	19374156	nonIDM	IDM	nonIDM
S1_19374177	1	19374177	nonIDM	nonIDM	nonIDM
S1_19374234	1	19374234	nonIDM	nonIDM	nonIDM
S1_19374390	1	19374390	nonIDM	IDM	nonIDM
S1_19374420	1	19374420	nonIDM	nonIDM	nonIDM
S1_19374472	1	19374472	nonIDM	nonIDM	IDM
S1_19375434	1	19375434	nonIDM	nonIDM	nonIDM
S1_19375747	1	19375747	nonIDM	nonIDM	nonIDM
S1_19375789	1	19375789	nonIDM	nonIDM	nonIDM
S1_19375947	1	19375947	nonIDM	nonIDM	nonIDM
S1_19379003	1	19379003	nonIDM	nonIDM	IDM
S1_19379075	1	19379075	nonIDM	nonIDM	nonIDM
S1_19379221	1	19379221	IDM	IDM	nonIDM
S1_19379233	1	19379233	IDM	nonIDM	nonIDM
S1_19379261	1	19379261	nonIDM	nonIDM	nonIDM
S1_19379323	1	19379323	nonIDM	nonIDM	nonIDM
S1_19379332	1	19379332	nonIDM	nonIDM	nonIDM
S1_19379685	1	19379685	nonIDM	nonIDM	nonIDM
S1_19379700	1	19379700	nonIDM	nonIDM	nonIDM
S1_19379713	1	19379713	nonIDM	nonIDM	nonIDM
S1_19379730	1	19379730	nonIDM	nonIDM	nonIDM
S1_19379864	1	19379864	nonIDM	nonIDM	nonIDM
S1_19381040	1	19381040	nonIDM	nonIDM	nonIDM
S1_19384130	1	19384130	nonIDM	IDM	nonIDM
S1_19389293	1	19389293	nonIDM	nonIDM	nonIDM
S1_19390677	1	19390677	nonIDM	nonIDM	nonIDM
S1_19390686	1	19390686	nonIDM	nonIDM	nonIDM
S1_19390822	1	19390822	nonIDM	nonIDM	nonIDM
S1_19393398	1	19393398	nonIDM	IDM	nonIDM
S1_19393410	1	19393410	nonIDM	nonIDM	nonIDM
S1_19394218	1	19394218	nonIDM	nonIDM	nonIDM
S1_19394237	1	19394237	nonIDM	nonIDM	nonIDM
S1_19394455	1	19394455	nonIDM	nonIDM	IDM
S1_19394603	1	19394603	IDM	nonIDM	nonIDM
S1_19394623	1	19394623	nonIDM	nonIDM	nonIDM
S1_19394746	1	19394746	nonIDM	nonIDM	nonIDM
S1_19396130	1	19396130	nonIDM	nonIDM	nonIDM
S1_19399196	1	19399196	nonIDM	nonIDM	nonIDM
S1_19399242	1	19399242	nonIDM	nonIDM	nonIDM
S1_19399293	1	19399293	nonIDM	nonIDM	nonIDM
S1_19399424	1	19399424	nonIDM	nonIDM	nonIDM
S1_19410994	1	19410994	nonIDM	nonIDM	nonIDM
S1_19434370	1	19434370	nonIDM	nonIDM	nonIDM
S1_19434705	1	19434705	nonIDM	nonIDM	IDM
S1_19434711	1	19434711	nonIDM	nonIDM	nonIDM
S1_19434731	1	19434731	nonIDM	nonIDM	IDM
S1_19434806	1	19434806	nonIDM	nonIDM	nonIDM
S1_19436661	1	19436661	nonIDM	nonIDM	nonIDM
S1_19446425	1	19446425	nonIDM	nonIDM	nonIDM
S1_19446448	1	19446448	nonIDM	nonIDM	nonIDM
S1_19446665	1	19446665	nonIDM	IDM	nonIDM
S1_19463231	1	19463231	IDM	nonIDM	nonIDM
S1_19463808	1	19463808	nonIDM	nonIDM	IDM
S1_19463958	1	19463958	IDM	nonIDM	nonIDM
S1_19463985	1	19463985	nonIDM	nonIDM	IDM
S1_19480721	1	19480721	IDM	nonIDM	nonIDM
S1_19480730	1	19480730	nonIDM	nonIDM	nonIDM
S1_19480873	1	19480873	IDM	nonIDM	nonIDM
S1_19480879	1	19480879	nonIDM	IDM	nonIDM
S1_19480893	1	19480893	nonIDM	IDM	nonIDM
S1_19481429	1	19481429	nonIDM	nonIDM	nonIDM
S1_19482487	1	19482487	nonIDM	nonIDM	IDM
S1_19489321	1	19489321	nonIDM	nonIDM	nonIDM
S1_19489362	1	19489362	nonIDM	nonIDM	nonIDM
S1_19489692	1	19489692	IDM	nonIDM	IDM
S1_19489710	1	19489710	nonIDM	nonIDM	nonIDM
S1_19489817	1	19489817	nonIDM	IDM	IDM
S1_19490055	1	19490055	nonIDM	nonIDM	nonIDM
S1_19490613	1	19490613	nonIDM	IDM	nonIDM
S1_19492679	1	19492679	nonIDM	nonIDM	nonIDM
S1_19492754	1	19492754	nonIDM	nonIDM	nonIDM
S1_19492834	1	19492834	nonIDM	nonIDM	nonIDM
S1_19493795	1	19493795	nonIDM	nonIDM	nonIDM
S1_19493807	1	19493807	IDM	nonIDM	nonIDM
S1_19494158	1	19494158	nonIDM	nonIDM	nonIDM
S1_19494365	1	19494365	nonIDM	nonIDM	nonIDM
S1_19494464	1	19494464	nonIDM	nonIDM	nonIDM
S1_19496609	1	19496609	nonIDM	nonIDM	nonIDM
S1_19496997	1	19496997	IDM	nonIDM	nonIDM
S1_19498413	1	19498413	nonIDM	nonIDM	IDM
S1_19498623	1	19498623	nonIDM	nonIDM	nonIDM
S1_19499052	1	19499052	nonIDM	nonIDM	IDM
S1_19499059	1	19499059	nonIDM	nonIDM	nonIDM
S1_19505778	1	19505778	nonIDM	nonIDM	nonIDM
S1_19510220	1	19510220	nonIDM	nonIDM	nonIDM
S1_19510262	1	19510262	nonIDM	nonIDM	nonIDM
S1_19510287	1	19510287	nonIDM	IDM	nonIDM
S1_19510294	1	19510294	IDM	IDM	nonIDM
S1_19510626	1	19510626	nonIDM	nonIDM	nonIDM
S1_19517433	1	19517433	IDM	IDM	nonIDM
S1_19517702	1	19517702	nonIDM	nonIDM	nonIDM
S1_19517721	1	19517721	nonIDM	nonIDM	nonIDM
S1_19517848	1	19517848	nonIDM	IDM	nonIDM
S1_19517862	1	19517862	nonIDM	IDM	nonIDM
S1_19517923	1	19517923	nonIDM	nonIDM	nonIDM
S1_19518146	1	19518146	IDM	nonIDM	nonIDM
S1_19518367	1	19518367	nonIDM	nonIDM	nonIDM
S1_19520800	1	19520800	nonIDM	nonIDM	nonIDM
S1_19523419	1	19523419	nonIDM	nonIDM	nonIDM
S1_19523467	1	19523467	nonIDM	nonIDM	nonIDM
S1_19523497	1	19523497	IDM	nonIDM	nonIDM
S1_19562067	1	19562067	nonIDM	nonIDM	IDM
S1_19570077	1	19570077	nonIDM	nonIDM	IDM
S1_19570085	1	19570085	IDM	nonIDM	nonIDM
S1_19570720	1	19570720	IDM	IDM	nonIDM
S1_19570818	1	19570818	nonIDM	nonIDM	nonIDM
S1_19570959	1	19570959	nonIDM	nonIDM	nonIDM
S1_19570980	1	19570980	nonIDM	nonIDM	nonIDM
S1_19571143	1	19571143	nonIDM	nonIDM	nonIDM
S1_19571185	1	19571185	nonIDM	IDM	nonIDM
S1_19588179	1	19588179	nonIDM	nonIDM	nonIDM
S1_19588278	1	19588278	nonIDM	nonIDM	nonIDM
S1_19618817	1	19618817	nonIDM	nonIDM	IDM
S1_19618847	1	19618847	nonIDM	nonIDM	nonIDM
S1_19624787	1	19624787	IDM	nonIDM	nonIDM
S1_19624809	1	19624809	IDM	IDM	nonIDM
S1_19625114	1	19625114	IDM	nonIDM	nonIDM
S1_19625318	1	19625318	nonIDM	IDM	nonIDM
S1_19646841	1	19646841	nonIDM	nonIDM	nonIDM
S1_19646978	1	19646978	nonIDM	IDM	nonIDM
S1_19646995	1	19646995	nonIDM	nonIDM	IDM
S1_19661696	1	19661696	nonIDM	nonIDM	nonIDM
S1_19675515	1	19675515	nonIDM	IDM	nonIDM
S1_19675790	1	19675790	IDM	nonIDM	nonIDM
S1_19675825	1	19675825	nonIDM	nonIDM	nonIDM
S1_19676001	1	19676001	nonIDM	nonIDM	nonIDM
S1_19676027	1	19676027	nonIDM	nonIDM	nonIDM
S1_19676043	1	19676043	nonIDM	nonIDM	nonIDM
S1_19764286	1	19764286	nonIDM	nonIDM	IDM
S1_19764310	1	19764310	nonIDM	nonIDM	nonIDM
S1_19774265	1	19774265	IDM	IDM	nonIDM
S1_19774307	1	19774307	nonIDM	IDM	nonIDM
S1_19792060	1	19792060	nonIDM	nonIDM	nonIDM
S1_19792072	1	19792072	IDM	nonIDM	nonIDM
S1_19796431	1	19796431	nonIDM	IDM	nonIDM
S1_19821283	1	19821283	nonIDM	nonIDM	nonIDM
S1_19831653	1	19831653	nonIDM	nonIDM	nonIDM
S1_19831701	1	19831701	nonIDM	nonIDM	nonIDM
S1_19831707	1	19831707	nonIDM	IDM	nonIDM
S1_19833776	1	19833776	nonIDM	nonIDM	nonIDM
S1_19833794	1	19833794	nonIDM	IDM	nonIDM
S1_19834533	1	19834533	nonIDM	nonIDM	nonIDM
S1_19834886	1	19834886	nonIDM	nonIDM	nonIDM
S1_19834929	1	19834929	nonIDM	nonIDM	nonIDM
S1_19838425	1	19838425	nonIDM	nonIDM	nonIDM
S1_19838440	1	19838440	nonIDM	nonIDM	IDM
S1_19838728	1	19838728	nonIDM	nonIDM	nonIDM
S1_19872638	1	19872638	nonIDM	nonIDM	IDM
S1_19875242	1	19875242	nonIDM	nonIDM	IDM
S1_19875449	1	19875449	nonIDM	nonIDM	nonIDM
S1_19875476	1	19875476	nonIDM	nonIDM	nonIDM
S1_19877074	1	19877074	nonIDM	nonIDM	nonIDM
S1_19877178	1	19877178	nonIDM	nonIDM	nonIDM
S1_19877489	1	19877489	nonIDM	nonIDM	nonIDM
S1_19877500	1	19877500	nonIDM	nonIDM	nonIDM
S1_19893177	1	19893177	nonIDM	nonIDM	nonIDM
S1_19893199	1	19893199	nonIDM	nonIDM	nonIDM
S1_19893320	1	19893320	nonIDM	nonIDM	IDM
S1_19893494	1	19893494	nonIDM	nonIDM	nonIDM
S1_19895893	1	19895893	nonIDM	nonIDM	nonIDM
S1_19901331	1	19901331	nonIDM	nonIDM	nonIDM
S1_19901423	1	19901423	nonIDM	nonIDM	nonIDM
S1_19901446	1	19901446	nonIDM	nonIDM	nonIDM
S1_19903714	1	19903714	nonIDM	nonIDM	nonIDM
S1_19946926	1	19946926	nonIDM	IDM	nonIDM
S1_19947006	1	19947006	nonIDM	nonIDM	nonIDM
S1_19948976	1	19948976	nonIDM	nonIDM	nonIDM
S1_19949059	1	19949059	nonIDM	nonIDM	nonIDM
S1_19949068	1	19949068	nonIDM	nonIDM	nonIDM
S1_19949074	1	19949074	nonIDM	nonIDM	nonIDM
S1_19949586	1	19949586	IDM	nonIDM	nonIDM
S1_19949591	1	19949591	nonIDM	IDM	nonIDM
S1_19951099	1	19951099	nonIDM	nonIDM	nonIDM
S1_19951315	1	19951315	nonIDM	nonIDM	IDM
S1_19986511	1	19986511	nonIDM	nonIDM	nonIDM
S1_19986538	1	19986538	nonIDM	nonIDM	IDM
S1_19986682	1	19986682	nonIDM	nonIDM	nonIDM
S1_19986692	1	19986692	nonIDM	nonIDM	nonIDM
S1_19988456	1	19988456	nonIDM	nonIDM	nonIDM
S1_19988564	1	19988564	nonIDM	nonIDM	nonIDM
S1_20012177	1	20012177	nonIDM	IDM	nonIDM
S1_20012219	1	20012219	nonIDM	nonIDM	IDM
S1_20012989	1	20012989	IDM	IDM	nonIDM
S1_20027711	1	20027711	nonIDM	nonIDM	IDM
S1_20027826	1	20027826	nonIDM	nonIDM	IDM
S1_20034292	1	20034292	nonIDM	IDM	nonIDM
S1_20034302	1	20034302	nonIDM	nonIDM	nonIDM
S1_20036236	1	20036236	nonIDM	nonIDM	nonIDM
S1_20036245	1	20036245	nonIDM	nonIDM	nonIDM
S1_20036271	1	20036271	nonIDM	nonIDM	nonIDM
S1_20037406	1	20037406	nonIDM	nonIDM	nonIDM
S1_20037424	1	20037424	nonIDM	nonIDM	nonIDM
S1_20037447	1	20037447	nonIDM	nonIDM	IDM
S1_20037455	1	20037455	nonIDM	nonIDM	nonIDM
S1_20037463	1	20037463	IDM	IDM	nonIDM
S1_20038808	1	20038808	IDM	IDM	nonIDM
S1_20038876	1	20038876	IDM	nonIDM	nonIDM
S1_20038923	1	20038923	nonIDM	IDM	nonIDM
S1_20040864	1	20040864	nonIDM	nonIDM	nonIDM
S1_20040881	1	20040881	IDM	nonIDM	nonIDM
S1_20040940	1	20040940	nonIDM	nonIDM	IDM
S1_20040981	1	20040981	nonIDM	nonIDM	nonIDM
S1_20041003	1	20041003	nonIDM	nonIDM	nonIDM
S1_20041132	1	20041132	IDM	nonIDM	IDM
S1_20043563	1	20043563	nonIDM	IDM	nonIDM
S1_20043607	1	20043607	IDM	nonIDM	IDM
S1_20071769	1	20071769	nonIDM	nonIDM	nonIDM
S1_20071796	1	20071796	nonIDM	nonIDM	nonIDM
S1_20071848	1	20071848	nonIDM	nonIDM	nonIDM
S1_20073342	1	20073342	nonIDM	IDM	nonIDM
S1_20074355	1	20074355	nonIDM	nonIDM	nonIDM
S1_20077466	1	20077466	nonIDM	nonIDM	nonIDM
S1_20077649	1	20077649	nonIDM	nonIDM	IDM
S1_20077755	1	20077755	nonIDM	nonIDM	nonIDM
S1_20078534	1	20078534	nonIDM	nonIDM	nonIDM
S1_20176099	1	20176099	nonIDM	nonIDM	nonIDM
S1_20176118	1	20176118	nonIDM	nonIDM	nonIDM
S1_20199737	1	20199737	nonIDM	nonIDM	nonIDM
S1_20199849	1	20199849	nonIDM	IDM	nonIDM
S1_20206658	1	20206658	nonIDM	IDM	nonIDM
S1_20206677	1	20206677	nonIDM	nonIDM	nonIDM
S1_20206706	1	20206706	nonIDM	nonIDM	IDM
S1_20215939	1	20215939	nonIDM	nonIDM	IDM
S1_20215971	1	20215971	nonIDM	nonIDM	nonIDM
S1_20215977	1	20215977	nonIDM	nonIDM	nonIDM
S1_20221361	1	20221361	nonIDM	nonIDM	nonIDM
S1_20251996	1	20251996	nonIDM	nonIDM	nonIDM
S1_20254878	1	20254878	nonIDM	nonIDM	nonIDM
S1_20260640	1	20260640	nonIDM	IDM	nonIDM
S1_20272405	1	20272405	nonIDM	nonIDM	nonIDM
S1_20272657	1	20272657	IDM	IDM	nonIDM
S1_20272693	1	20272693	nonIDM	IDM	nonIDM
S1_20284528	1	20284528	nonIDM	nonIDM	IDM
S1_20284538	1	20284538	nonIDM	IDM	nonIDM
S1_20284600	1	20284600	nonIDM	nonIDM	nonIDM
S1_20286027	1	20286027	nonIDM	nonIDM	nonIDM
S1_20286034	1	20286034	IDM	nonIDM	nonIDM
S1_20288128	1	20288128	nonIDM	IDM	nonIDM
S1_20288286	1	20288286	nonIDM	nonIDM	nonIDM
S1_20312238	1	20312238	nonIDM	nonIDM	nonIDM
S1_20317325	1	20317325	nonIDM	nonIDM	nonIDM
S1_20345157	1	20345157	nonIDM	nonIDM	nonIDM
S1_20347943	1	20347943	nonIDM	nonIDM	nonIDM
S1_20347986	1	20347986	nonIDM	nonIDM	nonIDM
S1_20351464	1	20351464	nonIDM	nonIDM	nonIDM
S1_20354328	1	20354328	nonIDM	nonIDM	nonIDM
S1_20354343	1	20354343	nonIDM	nonIDM	nonIDM
S1_20354377	1	20354377	nonIDM	nonIDM	nonIDM
S1_20379913	1	20379913	nonIDM	nonIDM	nonIDM
S1_20380055	1	20380055	nonIDM	IDM	nonIDM
S1_20385635	1	20385635	IDM	nonIDM	nonIDM
S1_20385673	1	20385673	IDM	nonIDM	nonIDM
S1_20385861	1	20385861	nonIDM	nonIDM	nonIDM
S1_20398295	1	20398295	IDM	nonIDM	nonIDM
S1_20398305	1	20398305	IDM	nonIDM	nonIDM
S1_20398315	1	20398315	IDM	IDM	nonIDM
S1_20399302	1	20399302	nonIDM	nonIDM	nonIDM
S1_20399340	1	20399340	nonIDM	nonIDM	nonIDM
S1_20399356	1	20399356	IDM	nonIDM	nonIDM
S1_20399419	1	20399419	nonIDM	nonIDM	nonIDM
S1_20399434	1	20399434	nonIDM	nonIDM	nonIDM
S1_20399452	1	20399452	IDM	nonIDM	nonIDM
[truncated: 72,529 more rows]

## Sheet: TableS08
Sample	SampleMethod	CorGRMs
0	IDMs	0.302288
1	Random	0.992528
2	Random	0.992406
3	Random	0.992172
4	Random	0.992448
5	Random	0.992577

## Sheet: TableS09
V1	V2	V3	V4	V5
0.422308	413	413	413	1_26576
-1	0	0	0	1_26624
-1	0	0	0	1_26659
-1	0	0	0	1_26662
-1	0	0	0	1_27720
-1	0	0	0	1_27724
-1	0	0	0	1_27739
-1	0	0	0	1_27746
-1	0	0	0	1_27861
-1	0	0	0	1_27874
0.22873	430	430	430	1_75465
0.152752	430	430	430	1_75629
0.415409	435	435	435	1_84637
-1	0	0	0	1_84746
-1	0	0	0	1_84799
-1	0	0	0	1_84827
-1	0	0	0	1_84838
0	437	437	437	1_84843
-1	0	0	0	1_84868
-1	0	0	0	1_84975
-1	0	0	0	1_126181
-1	0	0	0	1_126189
-1	0	0	0	1_126190
-1	0	0	0	1_126230
-1	0	0	0	1_126256
-1	0	0	0	1_126260
-1	0	0	0	1_126261
-1	0	0	0	1_126269
-1	0	0	0	1_126270
-1	0	0	0	1_126277
-1	0	0	0	1_126282
0	446	446	446	1_126289
0.219383	446	446	446	1_126406
-1	0	0	0	1_126409
0.165159	446	446	446	1_126442
-1	0	0	0	1_126463
-1	0	0	0	1_126477
-1	0	0	0	1_126481
-1	0	0	0	1_126501
0.386719	446	446	446	1_126511
-1	0	0	0	1_126543
-1	0	0	0	1_126546
-1	0	0	0	1_126575
-1	0	0	0	1_126581
-1	0	0	0	1_126583
-1	0	0	0	1_126584
-1	0	0	0	1_126630
-1	0	0	0	1_126633
-1	0	0	0	1_126655
-1	0	0	0	1_126681
-1	0	0	0	1_126707
-1	0	0	0	1_126708
-1	0	0	0	1_126711
-1	0	0	0	1_127196
-1	0	0	0	1_127241
-1	0	0	0	1_137051
-1	0	0	0	1_137062
-1	0	0	0	1_143855
-1	0	0	0	1_143943
-1	0	0	0	1_144275
-1	0	0	0	1_144281
0.220452	450	450	450	1_145739
0.355149	450	450	450	1_145889
-1	0	0	0	1_145960
-1	0	0	0	1_146000
-1	0	0	0	1_146013
-1	0	0	0	1_146026
-1	0	0	0	1_147839
-1	0	0	0	1_147849
-1	0	0	0	1_147860
-1	0	0	0	1_147862
-1	0	0	0	1_176603
-1	0	0	0	1_176604
-1	0	0	0	1_176757
-1	0	0	0	1_184758
-1	0	0	0	1_184820
-1	0	0	0	1_185023
-1	0	0	0	1_185025
-1	0	0	0	1_185026
-1	0	0	0	1_185027
-1	0	0	0	1_185028
-1	0	0	0	1_185031
-1	0	0	0	1_185032
-1	0	0	0	1_185034
-1	0	0	0	1_185035
-1	0	0	0	1_185078
-1	0	0	0	1_185117
-1	0	0	0	1_185138
-1	0	0	0	1_185140
-1	0	0	0	1_185522
-1	0	0	0	1_200110
-1	0	0	0	1_252301
0.271212	453	453	453	1_252326
-1	0	0	0	1_252329
-1	0	0	0	1_252376
0.012293	453	453	453	1_252382
-1	0	0	0	1_252391
-1	0	0	0	1_252397
-1	0	0	0	1_252398
-1	0	0	0	1_252403
-1	0	0	0	1_252409
-1	0	0	0	1_252441
-1	0	0	0	1_252450
-1	0	0	0	1_253194
-1	0	0	0	1_253294
-1	0	0	0	1_253550
-1	0	0	0	1_253596
-1	0	0	0	1_253605
-1	0	0	0	1_253608
-1	0	0	0	1_253684
-1	0	0	0	1_253728
-1	0	0	0	1_253730
-1	0	0	0	1_253732
-1	0	0	0	1_253935
-1	0	0	0	1_253958
-1	0	0	0	1_253984
-1	0	0	0	1_253990
-1	0	0	0	1_254015
-1	0	0	0	1_254029
-1	0	0	0	1_254074
-1	0	0	0	1_254121
0	453	453	453	1_254148
-1	0	0	0	1_255877
-1	0	0	0	1_255879
-1	0	0	0	1_255883
-1	0	0	0	1_255885
-1	0	0	0	1_255889
-1	0	0	0	1_255916
-1	0	0	0	1_255925
-1	0	0	0	1_255931
-1	0	0	0	1_260659
0.634324	453	453	453	1_260691
0.222081	453	453	453	1_260701
0.142601	453	453	453	1_260716
-1	0	0	0	1_260788
-1	0	0	0	1_260807
0	453	453	453	1_260815
-1	0	0	0	1_260833
-1	0	0	0	1_288512
-1	0	0	0	1_292067
-1	0	0	0	1_292079
-1	0	0	0	1_292090
-1	0	0	0	1_292197
-1	0	0	0	1_292219
0	459	459	459	1_292227
-1	0	0	0	1_292233
-1	0	0	0	1_293629
-1	0	0	0	1_293659
-1	0	0	0	1_293678
-1	0	0	0	1_293687
0	459	459	459	1_294221
0	459	459	459	1_294550
-1	0	0	0	1_295200
-1	0	0	0	1_295222
-1	0	0	0	1_295223
-1	0	0	0	1_295225
-1	0	0	0	1_295230
-1	0	0	0	1_295231
-1	0	0	0	1_295234
-1	0	0	0	1_295246
-1	0	0	0	1_295269
-1	0	0	0	1_295270
-1	0	0	0	1_295278
-1	0	0	0	1_295281
-1	0	0	0	1_307906
-1	0	0	0	1_307950
-1	0	0	0	1_307957
0	459	459	459	1_307966
-1	0	0	0	1_308014
-1	0	0	0	1_308015
-1	0	0	0	1_308025
-1	0	0	0	1_308066
-1	0	0	0	1_308324
-1	0	0	0	1_308345
-1	0	0	0	1_308381
0.001663	459	459	459	1_311450
-1	0	0	0	1_340005
-1	0	0	0	1_340133
-1	0	0	0	1_342688
-1	0	0	0	1_342781
-1	0	0	0	1_342806
0.331346	459	459	459	1_346031
-1	0	0	0	1_346039
-1	0	0	0	1_346041
-1	0	0	0	1_346044
-1	0	0	0	1_346046
-1	0	0	0	1_346050
-1	0	0	0	1_346051
0.108908	459	459	459	1_346219
0.40747	459	459	459	1_346224
-1	0	0	0	1_354662
-1	0	0	0	1_354684
-1	0	0	0	1_354723
-1	0	0	0	1_354737
-1	0	0	0	1_354774
-1	0	0	0	1_354795
-1	0	0	0	1_354828
0.114309	459	459	459	1_354840
-1	0	0	0	1_354848
-1	0	0	0	1_354849
-1	0	0	0	1_354850
-1	0	0	0	1_354851
-1	0	0	0	1_354852
-1	0	0	0	1_354860
-1	0	0	0	1_354861
-1	0	0	0	1_354867
-1	0	0	0	1_354888
-1	0	0	0	1_354902
-1	0	0	0	1_356180
-1	0	0	0	1_356189
-1	0	0	0	1_356190
-1	0	0	0	1_356195
-1	0	0	0	1_356309
-1	0	0	0	1_356328
-1	0	0	0	1_356336
-1	0	0	0	1_356495
-1	0	0	0	1_356496
-1	0	0	0	1_356498
0	459	459	459	1_356953
-1	0	0	0	1_357009
-1	0	0	0	1_357010
-1	0	0	0	1_428041
-1	0	0	0	1_428070
-1	0	0	0	1_428071
-1	0	0	0	1_428074
-1	0	0	0	1_428075
-1	0	0	0	1_428185
-1	0	0	0	1_428187
-1	0	0	0	1_428190
-1	0	0	0	1_428199
-1	0	0	0	1_432870
-1	0	0	0	1_432876
-1	0	0	0	1_432921
-1	0	0	0	1_508729
-1	0	0	0	1_510169
-1	0	0	0	1_510193
-1	0	0	0	1_510204
-1	0	0	0	1_572056
-1	0	0	0	1_572123
-1	0	0	0	1_572126
0.776213	509	509	509	1_572133
0	509	509	509	1_581139
-1	0	0	0	1_581162
-1	0	0	0	1_581166
-1	0	0	0	1_581168
-1	0	0	0	1_581229
-1	0	0	0	1_581263
-1	0	0	0	1_581273
-1	0	0	0	1_581281
-1	0	0	0	1_582708
-1	0	0	0	1_582718
0.193122	509	509	509	1_582761
0	509	509	509	1_582943
-1	0	0	0	1_583200
-1	0	0	0	1_583204
-1	0	0	0	1_583244
-1	0	0	0	1_583245
-1	0	0	0	1_583246
-1	0	0	0	1_583247
0	509	509	509	1_583366
-1	0	0	0	1_615032
-1	0	0	0	1_615055
-1	0	0	0	1_615060
-1	0	0	0	1_616442
-1	0	0	0	1_616452
-1	0	0	0	1_618844
-1	0	0	0	1_618860
-1	0	0	0	1_618870
-1	0	0	0	1_618906
-1	0	0	0	1_618913
-1	0	0	0	1_632331
-1	0	0	0	1_632359
0	528	528	528	1_632382
-1	0	0	0	1_633876
-1	0	0	0	1_633887
0	528	528	528	1_633894
-1	0	0	0	1_633922
-1	0	0	0	1_633923
-1	0	0	0	1_633941
-1	0	0	0	1_633998
0.133256	528	528	528	1_635988
0	528	528	528	1_636002
-1	0	0	0	1_636018
-1	0	0	0	1_636229
0.056135	532	532	532	1_639631
-1	0	0	0	1_640019
-1	0	0	0	1_640044
-1	0	0	0	1_647714
0	532	532	532	1_647734
0.116497	532	532	532	1_647747
0.32572	532	532	532	1_647760
0	533	533	533	1_652613
-1	0	0	0	1_652653
-1	0	0	0	1_652654
-1	0	0	0	1_652655
0	533	533	533	1_652699
-1	0	0	0	1_652701
-1	0	0	0	1_652720
-1	0	0	0	1_652836
-1	0	0	0	1_652838
-1	0	0	0	1_652842
0.008795	547	547	547	1_695262
-1	0	0	0	1_695276
-1	0	0	0	1_695415
0.341255	547	547	547	1_697904
-1	0	0	0	1_719560
0	555	555	555	1_719628
0.86575	555	555	555	1_719688
0.214128	555	555	555	1_719722
-1	0	0	0	1_719851
-1	0	0	0	1_719884
-1	0	0	0	1_753162
-1	0	0	0	1_753210
-1	0	0	0	1_753220
-1	0	0	0	1_753254
-1	0	0	0	1_764473
-1	0	0	0	1_764477
-1	0	0	0	1_764480
-1	0	0	0	1_764481
-1	0	0	0	1_764483
-1	0	0	0	1_793016
-1	0	0	0	1_793031
0	565	565	565	1_793289
0	565	565	565	1_793325
0	565	565	565	1_793335
0.331685	565	565	565	1_793343
-1	0	0	0	1_793383
-1	0	0	0	1_793386
0.087606	565	565	565	1_793415
0	565	565	565	1_793451
0.205514	565	565	565	1_793742
0	565	565	565	1_793775
0.428282	565	565	565	1_793787
0.326524	565	565	565	1_794146
-1	0	0	0	1_797318
-1	0	0	0	1_797338
-1	0	0	0	1_797352
-1	0	0	0	1_797373
0.252445	565	565	565	1_805990
-1	0	0	0	1_806029
-1	0	0	0	1_806036
-1	0	0	0	1_806271
-1	0	0	0	1_806324
-1	0	0	0	1_806326
-1	0	0	0	1_806332
-1	0	0	0	1_806368
-1	0	0	0	1_806369
-1	0	0	0	1_806374
-1	0	0	0	1_806430
-1	0	0	0	1_806451
-1	0	0	0	1_806453
-1	0	0	0	1_806467
-1	0	0	0	1_806495
-1	0	0	0	1_806539
-1	0	0	0	1_806545
-1	0	0	0	1_806549
-1	0	0	0	1_806598
-1	0	0	0	1_806610
-1	0	0	0	1_811696
0.134511	565	565	565	1_811711
-1	0	0	0	1_811720
-1	0	0	0	1_811736
-1	0	0	0	1_811739
-1	0	0	0	1_811741
0	565	565	565	1_811750
0	565	565	565	1_811756
-1	0	0	0	1_816599
-1	0	0	0	1_816736
-1	0	0	0	1_816740
0	565	565	565	1_816743
-1	0	0	0	1_816752
-1	0	0	0	1_816754
-1	0	0	0	1_816779
-1	0	0	0	1_816788
0	565	565	565	1_829890
-1	0	0	0	1_829912
-1	0	0	0	1_829930
0.266076	565	565	565	1_830449
0.293356	565	565	565	1_832434
0.228922	565	565	565	1_832443
-1	0	0	0	1_832448
-1	0	0	0	1_832654
-1	0	0	0	1_832693
-1	0	0	0	1_832747
-1	0	0	0	1_832751
0	565	565	565	1_832786
-1	0	0	0	1_832787
-1	0	0	0	1_844765
-1	0	0	0	1_847182
-1	0	0	0	1_847183
0.022533	565	565	565	1_847206
0.021301	565	565	565	1_847822
-1	0	0	0	1_863034
-1	0	0	0	1_863046
-1	0	0	0	1_863052
-1	0	0	0	1_863055
-1	0	0	0	1_863070
-1	0	0	0	1_863080
-1	0	0	0	1_863098
-1	0	0	0	1_863109
-1	0	0	0	1_863110
-1	0	0	0	1_868883
-1	0	0	0	1_868895
-1	0	0	0	1_868916
-1	0	0	0	1_868920
0	575	575	575	1_868929
-1	0	0	0	1_868965
-1	0	0	0	1_868966
0	575	575	575	1_868970
-1	0	0	0	1_868981
-1	0	0	0	1_868983
-1	0	0	0	1_869000
-1	0	0	0	1_875146
-1	0	0	0	1_875147
-1	0	0	0	1_875171
-1	0	0	0	1_875175
-1	0	0	0	1_875176
-1	0	0	0	1_876204
-1	0	0	0	1_876216
-1	0	0	0	1_876240
-1	0	0	0	1_876257
0.149483	577	577	577	1_876586
0	577	577	577	1_876608
0	577	577	577	1_876617
-1	0	0	0	1_878214
-1	0	0	0	1_878221
-1	0	0	0	1_878224
-1	0	0	0	1_878387
-1	0	0	0	1_878406
-1	0	0	0	1_878422
0	578	578	578	1_880050
-1	0	0	0	1_881807
0	578	578	578	1_881840
-1	0	0	0	1_885177
0.07741	578	578	578	1_885211
0	578	578	578	1_885234
-1	0	0	0	1_885238
-1	0	0	0	1_885305
-1	0	0	0	1_885358
0	578	578	578	1_885619
0	578	578	578	1_885944
0	578	578	578	1_885961
0	578	578	578	1_885971
0.385381	578	578	578	1_885995
-1	0	0	0	1_943164
-1	0	0	0	1_943286
-1	0	0	0	1_945830
0	578	578	578	1_947465
-1	0	0	0	1_947479
-1	0	0	0	1_947482
-1	0	0	0	1_947524
-1	0	0	0	1_950675
-1	0	0	0	1_950680
-1	0	0	0	1_950684
-1	0	0	0	1_950692
0	578	578	578	1_964392
-1	0	0	0	1_964394
-1	0	0	0	1_964402
0.29327	578	578	578	1_964546
-1	0	0	0	1_964550
0.354815	578	578	578	1_964594
-1	0	0	0	1_964606
-1	0	0	0	1_964614
-1	0	0	0	1_964632
0	578	578	578	1_970056
-1	0	0	0	1_970119
-1	0	0	0	1_970120
-1	0	0	0	1_1019522
-1	0	0	0	1_1019527
-1	0	0	0	1_1019528
-1	0	0	0	1_1019531
-1	0	0	0	1_1019549
-1	0	0	0	1_1019561
-1	0	0	0	1_1021996
-1	0	0	0	1_1021998
-1	0	0	0	1_1022012
-1	0	0	0	1_1022013
-1	0	0	0	1_1022037
0.247111	602	602	602	1_1075541
-1	0	0	0	1_1075573
0	602	602	602	1_1077841
0	602	602	602	1_1077846
-1	0	0	0	1_1077865
-1	0	0	0	1_1077871
0	602	602	602	1_1078141
-1	0	0	0	1_1080724
-1	0	0	0	1_1080759
-1	0	0	0	1_1083673
0	602	602	602	1_1084450
0	602	602	602	1_1084456
0	610	610	610	1_1132830
0	610	610	610	1_1135600
-1	0	0	0	1_1135693
0	610	610	610	1_1135712
-1	0	0	0	1_1135717
-1	0	0	0	1_1135722
-1	0	0	0	1_1135724
-1	0	0	0	1_1135725
0.037725	610	610	610	1_1135728
-1	0	0	0	1_1135757
-1	0	0	0	1_1135777
-1	0	0	0	1_1135778
-1	0	0	0	1_1135811
0.023146	610	610	610	1_1136022
-1	0	0	0	1_1148933
-1	0	0	0	1_1148985
-1	0	0	0	1_1148986
0.457647	621	621	621	1_1152126
0.139152	621	621	621	1_1152160
-1	0	0	0	1_1152161
-1	0	0	0	1_1152162
-1	0	0	0	1_1152163
0.029765	621	621	621	1_1152190
-1	0	0	0	1_1152191
0	621	621	621	1_1152201
-1	0	0	0	1_1154942
-1	0	0	0	1_1154956
0	624	624	624	1_1154974
0.175619	624	624	624	1_1155000
-1	0	0	0	1_1155014
-1	0	0	0	1_1155016
-1	0	0	0	1_1155018
-1	0	0	0	1_1155019
0	624	624	624	1_1155112
0.135002	624	624	624	1_1155117
0	624	624	624	1_1155148
0	624	624	624	1_1155187
-1	0	0	0	1_1163469
-1	0	0	0	1_1163470
-1	0	0	0	1_1163486
-1	0	0	0	1_1163492
0	624	624	624	1_1174219
-1	0	0	0	1_1174236
-1	0	0	0	1_1174346
-1	0	0	0	1_1174355
-1	0	0	0	1_1174366
0	624	624	624	1_1210849
-1	0	0	0	1_1210858
-1	0	0	0	1_1210868
-1	0	0	0	1_1210875
0	624	624	624	1_1210902
-1	0	0	0	1_1211141
-1	0	0	0	1_1211270
0	624	624	624	1_1211525
-1	0	0	0	1_1212882
-1	0	0	0	1_1212898
-1	0	0	0	1_1212925
-1	0	0	0	1_1212969
-1	0	0	0	1_1212970
0	624	624	624	1_1214719
0.419441	624	624	624	1_1216563
-1	0	0	0	1_1220931
-1	0	0	0	1_1220940
0	624	624	624	1_1220950
0	624	624	624	1_1262935
-1	0	0	0	1_1263205
-1	0	0	0	1_1263217
-1	0	0	0	1_1263220
-1	0	0	0	1_1263224
-1	0	0	0	1_1263236
-1	0	0	0	1_1263300
-1	0	0	0	1_1264653
-1	0	0	0	1_1267649
-1	0	0	0	1_1267650
-1	0	0	0	1_1267662
-1	0	0	0	1_1267675
-1	0	0	0	1_1270438
-1	0	0	0	1_1270439
-1	0	0	0	1_1270441
-1	0	0	0	1_1270452
-1	0	0	0	1_1270478
0.464565	644	644	644	1_1291241
-1	0	0	0	1_1291900
-1	0	0	0	1_1291901
-1	0	0	0	1_1291946
-1	0	0	0	1_1291964
-1	0	0	0	1_1292012
-1	0	0	0	1_1292016
-1	0	0	0	1_1292041
-1	0	0	0	1_1292045
-1	0	0	0	1_1292048
-1	0	0	0	1_1292059
-1	0	0	0	1_1292088
-1	0	0	0	1_1292147
-1	0	0	0	1_1292171
-1	0	0	0	1_1292188
-1	0	0	0	1_1292197
-1	0	0	0	1_1292745
-1	0	0	0	1_1292785
0	644	644	644	1_1292835
-1	0	0	0	1_1292836
-1	0	0	0	1_1292856
-1	0	0	0	1_1292880
-1	0	0	0	1_1293090
-1	0	0	0	1_1293095
-1	0	0	0	1_1293102
-1	0	0	0	1_1293103
-1	0	0	0	1_1293114
-1	0	0	0	1_1293124
-1	0	0	0	1_1293126
-1	0	0	0	1_1293129
-1	0	0	0	1_1293144
-1	0	0	0	1_1293149
0.019027	644	644	644	1_1293303
-1	0	0	0	1_1310674
0	644	644	644	1_1310706
-1	0	0	0	1_1310749
-1	0	0	0	1_1310753
-1	0	0	0	1_1310762
-1	0	0	0	1_1310768
-1	0	0	0	1_1312007
-1	0	0	0	1_1312012
-1	0	0	0	1_1312396
-1	0	0	0	1_1312505
0	644	644	644	1_1313587
-1	0	0	0	1_1313975
-1	0	0	0	1_1313992
-1	0	0	0	1_1314061
-1	0	0	0	1_1314064
0	644	644	644	1_1314066
-1	0	0	0	1_1314068
-1	0	0	0	1_1314069
-1	0	0	0	1_1314072
-1	0	0	0	1_1314074
0	644	644	644	1_1314094
0	644	644	644	1_1314373
-1	0	0	0	1_1314857
-1	0	0	0	1_1315076
0	644	644	644	1_1343882
0.06072	644	644	644	1_1343892
-1	0	0	0	1_1345512
-1	0	0	0	1_1345559
-1	0	0	0	1_1345632
-1	0	0	0	1_1345636
-1	0	0	0	1_1345678
-1	0	0	0	1_1345726
-1	0	0	0	1_1345731
-1	0	0	0	1_1345732
-1	0	0	0	1_1345736
-1	0	0	0	1_1345788
-1	0	0	0	1_1361323
-1	0	0	0	1_1361364
-1	0	0	0	1_1361373
-1	0	0	0	1_1361380
0	650	650	650	1_1361434
-1	0	0	0	1_1361440
-1	0	0	0	1_1361444
-1	0	0	0	1_1361450
-1	0	0	0	1_1361451
-1	0	0	0	1_1361460
0	650	650	650	1_1361475
-1	0	0	0	1_1361501
-1	0	0	0	1_1361508
-1	0	0	0	1_1361517
0.215445	650	650	650	1_1361524
-1	0	0	0	1_1361585
-1	0	0	0	1_1363081
-1	0	0	0	1_1363102
0	653	653	653	1_1367954
-1	0	0	0	1_1367991
0	659	659	659	1_1374141
-1	0	0	0	1_1374381
-1	0	0	0	1_1374382
0.384052	659	659	659	1_1374420
0	659	659	659	1_1374438
0	661	661	661	1_1376070
-1	0	0	0	1_1376109
-1	0	0	0	1_1376187
-1	0	0	0	1_1376196
-1	0	0	0	1_1380992
0	663	663	663	1_1381958
0	663	663	663	1_1381966
0.338158	663	663	663	1_1381983
0	677	677	677	1_1411716
0.465407	678	678	678	1_1419661
-1	0	0	0	1_1420950
-1	0	0	0	1_1421049
-1	0	0	0	1_1421059
-1	0	0	0	1_1421066
-1	0	0	0	1_1421067
0	678	678	678	1_1421085
-1	0	0	0	1_1427074
0	685	685	685	1_1427092
-1	0	0	0	1_1427103
-1	0	0	0	1_1427108
-1	0	0	0	1_1427109
-1	0	0	0	1_1427241
-1	0	0	0	1_1427259
0.13118	685	685	685	1_1427518
0.133873	685	685	685	1_1427538
-1	0	0	0	1_1430528
-1	0	0	0	1_1430531
0	688	688	688	1_1430540
-1	0	0	0	1_1430546
0	689	689	689	1_1437922
0	689	689	689	1_1437961
0.133571	689	689	689	1_1438142
0	689	689	689	1_1438155
0	689	689	689	1_1438161
-1	0	0	0	1_1438183
0	689	689	689	1_1438203
0	697	697	697	1_1454085
-1	0	0	0	1_1454089
-1	0	0	0	1_1454120
0	697	697	697	1_1454229
0	697	697	697	1_1454465
-1	0	0	0	1_1457519
-1	0	0	0	1_1462850
-1	0	0	0	1_1512516
-1	0	0	0	1_1512521
0.182682	709	709	709	1_1538986
0	709	709	709	1_1539000
-1	0	0	0	1_1542363
-1	0	0	0	1_1542376
-1	0	0	0	1_1542432
[truncated: 213,682+ more rows]

## Sheet: TableS10
Trait	LOCATION	YEAR.HARVESTED	LOC.YEAR	LOC.YEAR.TRIAL	TRIAL.TYPE	Nobs	Nclone	Nrep	ObsToCloneRatio	INSTITUTE	TrialNo	LRT_IDM	LRT_nonIDM	CorEsts	LRTnullSig	Filter1	LRTnonIIDsig	Filter2	BestModel	DiffFrom2ndBest	SecondBestModel	Filter3	Models	LL	Npar	AIC	Source	Var	PVE	LRT_null
[truncated: 3,031 more rows]

[truncated: 11 more sheets: TableS11, TableS12, TableS13, TableS14, TableS15, TableS16, TableS17, TableS18, TableS19, TableS20, TableS21]
